# Supplementary material for: Eco-evolutionary Dynamics of Prokaryotic and Viral Communities in a Glacial Foreland
Source: Research Square preprint supplement (doi:10.21203/rs.3.rs-6681177/v1), 2025-12-02
Supplement: Supplementary file 1 [file 08c08e39e0cf3dc644bb83aa.xlsx]

## Sheet: Table S1
sample	Site	Sulfate (mg/Kg)	Nitrate (mg/kg)	ammonia (mg/kg)	age (year)	reads number of metagenomes
1-1	S1	862.282	16.4263	12.0708	1	57787453
1-4	S1	822.229	14.9978	12.3062	1	59615292
1-8	S1	37.8802	12.41	12.2502	1	63337303
2-4	S2	384.359	17.1593	11.4891	5	48570088
2-56	S2	606.212	15.1496	12.3848	5	53762951
2-66	S2	536.27	17.361	10.1778	5	57983164
3-26	S3	427.708	40.971	13.0727	12	54781979
3-4	S3	325.906	66.667	12.1634	12	54704231
3-5	S3	595.55	62.7527	12.5919	12	48896403
4-2	S4	119.235	169.425	12.4328	41	59995207
4-6	S4	524.001	76.2999	11.0743	41	52628714
4-7	S4	183.329	294.125	10.4845	41	58746017
5-5	S5	61.909	150.239	0.922623	51	61484770
5-6	S5	36.4899	208.412	13.3903	51	61586749
5-7	S5	66.132	145.48	0.958627	51	54595459
6-2	S6	17.4254	189.62	12.8067	63	57787523
6-3	S6	59.0539	116.746	12.1885	63	52387137
6-4	S6	13.9467	40.5455	14.4258	63	56362975
7-1	S7	78.6061	64.9027	17.91	91	57297342
7-2	S7	30.3061	41.3042	22.3405	91	60668164
7-6	S7	20.6319	134.281	13.525	91	59291100
8-3	S8	78.9115	156.678	7.56481	131	51097480
8-4	S8	22.4637	89.9858	9.18575	131	64912348
8-5	S8	14.3007	64.3793	12.5264	131	50474471

## Sheet: Table S2
Species_clusters	Classification
1-1_bin.1	d__Bacteria;p__Actinobacteriota;c__Actinomycetia;o__Mycobacteriales;f__SCTD01;g__JAENVS01;s__
1-1_bin.10	d__Bacteria;p__Chloroflexota;c__Anaerolineae;o__Anaerolineales;f__EnvOPS12;g__OLB14;s__
1-1_bin.11	d__Bacteria;p__Patescibacteria;c__Saccharimonadia;o__Saccharimonadales;f__JACDFO01;g__;s__
1-1_bin.12	d__Bacteria;p__Patescibacteria;c__Saccharimonadia;o__Saccharimonadales;f__JACDFO01;g__JACDFO01;s__
1-1_bin.13	d__Bacteria;p__Patescibacteria;c__Paceibacteria;o__UBA9983_A;f__UBA2103;g__C7867-001;s__
1-1_bin.15	d__Bacteria;p__Elusimicrobiota;c__Elusimicrobia;o__UBA1565;f__UBA9628;g__GWA2-66-18;s__
1-1_bin.17	d__Bacteria;p__Proteobacteria;c__Gammaproteobacteria;o__JAHJQQ01;f__JAHJQQ01;g__JAHJQQ01;s__
1-1_bin.18	d__Bacteria;p__Proteobacteria;c__Gammaproteobacteria;o__;f__;g__;s__
1-1_bin.19	d__Bacteria;p__Bacteroidota;c__Bacteroidia;o__Cytophagales;f__Cyclobacteriaceae;g__ELB16-189;s__
1-1_bin.2	d__Bacteria;p__Actinobacteriota;c__Acidimicrobiia;o__Acidimicrobiales;f__AC-14;g__CADCTB01;s__
1-1_bin.20	d__Bacteria;p__Bacteroidota;c__Bacteroidia;o__AKYH767;f__Palsa-965;g__GCA-2737665;s__
1-1_bin.21	d__Bacteria;p__Proteobacteria;c__Alphaproteobacteria;o__Sphingomonadales;f__Sphingomonadaceae;g__Sphingorhabdus_B;s__
1-1_bin.22	d__Bacteria;p__Bacteroidota;c__Bacteroidia;o__AKYH767;f__B-17BO;g__UBA4416;s__
1-1_bin.23	d__Bacteria;p__Proteobacteria;c__Gammaproteobacteria;o__SG8-11;f__SG8-11;g__UBA6921;s__
1-1_bin.25	d__Bacteria;p__Proteobacteria;c__Gammaproteobacteria;o__Burkholderiales;f__Gallionellaceae;g__39-52-133;s__
1-1_bin.26	d__Bacteria;p__Proteobacteria;c__Gammaproteobacteria;o__Burkholderiales;f__RBG-16-58-11;g__RBG-16-58-11;s__
1-1_bin.3	d__Bacteria;p__Proteobacteria;c__Alphaproteobacteria;o__Sphingomonadales;f__Sphingomonadaceae;g__Sphingorhabdus_B;s__Sphingorhabdus_B sp001464315
1-1_bin.4	d__Bacteria;p__Proteobacteria;c__Gammaproteobacteria;o__Nevskiales;f__Nevskiaceae;g__Stagnimonas;s__
1-1_bin.5	d__Bacteria;p__RBG-13-61-14;c__;o__;f__;g__;s__
1-1_bin.6	d__Bacteria;p__Proteobacteria;c__Gammaproteobacteria;o__SZUA-229;f__SZUA-229;g__JACPVK01;s__
1-1_bin.7	d__Bacteria;p__Bacteroidota;c__Bacteroidia;o__Chitinophagales;f__Chitinophagaceae;g__Lacibacter;s__
1-1_bin.8	d__Bacteria;p__Actinobacteriota;c__Acidimicrobiia;o__Acidimicrobiales;f__CADCTF01;g__;s__
1-1_bin.9	d__Bacteria;p__Proteobacteria;c__Gammaproteobacteria;o__Burkholderiales;f__Burkholderiaceae;g__LMDS01;s__
1-4_bin.1	d__Bacteria;p__Proteobacteria;c__Gammaproteobacteria;o__Burkholderiales;f__Thiobacillaceae;g__;s__
1-4_bin.10	d__Bacteria;p__Proteobacteria;c__Gammaproteobacteria;o__Burkholderiales;f__Rhodocyclaceae;g__CAJAWW01;s__
1-4_bin.11	d__Bacteria;p__Proteobacteria;c__Alphaproteobacteria;o__Rickettsiales;f__UBA3002;g__QFOX01;s__
1-4_bin.12	d__Bacteria;p__Bacteroidota;c__Bacteroidia;o__Flavobacteriales;f__Crocinitomicaceae;g__;s__
1-4_bin.13	d__Bacteria;p__Actinobacteriota;c__Acidimicrobiia;o__Acidimicrobiales;f__Ilumatobacteraceae;g__UBA668;s__
1-4_bin.14	d__Bacteria;p__Actinobacteriota;c__Acidimicrobiia;o__Acidimicrobiales;f__JACDEA01;g__JACCXE01;s__
1-4_bin.15	d__Bacteria;p__Proteobacteria;c__Gammaproteobacteria;o__Burkholderiales;f__Burkholderiaceae;g__Ramlibacter;s__
1-4_bin.16	d__Bacteria;p__Proteobacteria;c__Alphaproteobacteria;o__Caulobacterales;f__Hyphomonadaceae;g__UBA7672;s__
1-4_bin.17	d__Bacteria;p__Gemmatimonadota;c__Gemmatimonadetes;o__Gemmatimonadales;f__Gemmatimonadaceae;g__PNKF01;s__
1-4_bin.18	d__Bacteria;p__Patescibacteria;c__Saccharimonadia;o__Saccharimonadales;f__2-12-FULL-41-12;g__;s__
1-4_bin.19	d__Bacteria;p__Proteobacteria;c__Gammaproteobacteria;o__Acidiferrobacterales;f__UBA6901;g__UBA6901;s__
1-4_bin.2	d__Bacteria;p__Patescibacteria;c__Saccharimonadia;o__Saccharimonadales;f__JACDFO01;g__JACDFO01;s__
1-4_bin.20	d__Bacteria;p__Actinobacteriota;c__Actinomycetia;o__Mycobacteriales;f__JADGOU01;g__;s__
1-4_bin.21	d__Bacteria;p__Proteobacteria;c__Gammaproteobacteria;o__Nevskiales;f__Nevskiaceae;g__JACPFV01;s__
1-4_bin.22	d__Bacteria;p__Cyanobacteria;c__Cyanobacteriia;o__Cyanobacteriales;f__Microcoleaceae;g__Microcoleus;s__
1-4_bin.23	d__Bacteria;p__Proteobacteria;c__Gammaproteobacteria;o__Burkholderiales;f__Burkholderiaceae;g__Limnobacter;s__
1-4_bin.24	d__Bacteria;p__Verrucomicrobiota;c__Verrucomicrobiae;o__Opitutales;f__Opitutaceae;g__ER46;s__
1-4_bin.25	d__Bacteria;p__Proteobacteria;c__Gammaproteobacteria;o__Nevskiales;f__Nevskiaceae;g__;s__
1-4_bin.3	d__Bacteria;p__Verrucomicrobiota;c__Verrucomicrobiae;o__Pedosphaerales;f__SXQI01;g__;s__
1-4_bin.5	d__Bacteria;p__Actinobacteriota;c__Actinomycetia;o__Actinomycetales;f__Micrococcaceae;g__Arthrobacter_I;s__
1-4_bin.6	d__Bacteria;p__Patescibacteria;c__Paceibacteria;o__UBA9983_A;f__UBA2103;g__C7867-001;s__
1-4_bin.7	d__Bacteria;p__Patescibacteria;c__Saccharimonadia;o__Saccharimonadales;f__;g__;s__
1-4_bin.8	d__Bacteria;p__Actinobacteriota;c__Thermoleophilia;o__Solirubrobacterales;f__Solirubrobacteraceae;g__SEOHO-28;s__
1-8_bin.10	d__Bacteria;p__Patescibacteria;c__Saccharimonadia;o__UBA4664;f__;g__;s__
1-8_bin.12	d__Bacteria;p__Actinobacteriota;c__Actinomycetia;o__Actinomycetales;f__Micrococcaceae;g__Pseudarthrobacter;s__Pseudarthrobacter sulfonivorans_A
1-8_bin.13	d__Bacteria;p__Patescibacteria;c__Paceibacteria;o__UBA9983_A;f__UBA6899;g__;s__
1-8_bin.14	d__Bacteria;p__Actinobacteriota;c__Actinomycetia;o__Mycobacteriales;f__SCTD01;g__SCTD01;s__
1-8_bin.15	d__Bacteria;p__Actinobacteriota;c__Thermoleophilia;o__Solirubrobacterales;f__Solirubrobacteraceae;g__LC5-1;s__
1-8_bin.17	d__Bacteria;p__Gemmatimonadota;c__Gemmatimonadetes;o__Gemmatimonadales;f__Gemmatimonadaceae;g__UBA4720;s__
1-8_bin.18	d__Bacteria;p__Actinobacteriota;c__Acidimicrobiia;o__Acidimicrobiales;f__GCA-2861595;g__;s__
1-8_bin.19	d__Bacteria;p__Proteobacteria;c__Gammaproteobacteria;o__Burkholderiales;f__Burkholderiaceae;g__Ramlibacter;s__
1-8_bin.2	d__Bacteria;p__Actinobacteriota;c__Actinomycetia;o__Mycobacteriales;f__SCTD01;g__;s__
1-8_bin.20	d__Bacteria;p__Gemmatimonadota;c__Gemmatimonadetes;o__Gemmatimonadales;f__Gemmatimonadaceae;g__JACDCY01;s__
1-8_bin.21	d__Bacteria;p__Actinobacteriota;c__UBA4738;o__;f__;g__;s__
1-8_bin.22	d__Bacteria;p__Proteobacteria;c__Gammaproteobacteria;o__Burkholderiales;f__Sulfuricellaceae_A;g__;s__
1-8_bin.23	d__Bacteria;p__Actinobacteriota;c__UBA4738;o__AC-67;f__AC-67;g__;s__
1-8_bin.24	d__Bacteria;p__Bacteroidota;c__Bacteroidia;o__AKYH767;f__B-17BO;g__JAFLBH01;s__
1-8_bin.26	d__Bacteria;p__Actinobacteriota;c__Acidimicrobiia;o__Acidimicrobiales;f__AC-14;g__;s__
1-8_bin.27	d__Bacteria;p__Bacteroidota;c__Bacteroidia;o__Chitinophagales;f__Chitinophagaceae;g__Ginsengibacter;s__
1-8_bin.28	d__Bacteria;p__Actinobacteriota;c__Actinomycetia;o__Propionibacteriales;f__Nocardioidaceae;g__Nocardioides;s__
1-8_bin.29	d__Bacteria;p__Acidobacteriota;c__Blastocatellia;o__Pyrinomonadales;f__Pyrinomonadaceae;g__OLB17;s__
1-8_bin.3	d__Bacteria;p__Proteobacteria;c__Alphaproteobacteria;o__Caulobacterales;f__Caulobacteraceae;g__Brevundimonas;s__
1-8_bin.30	d__Bacteria;p__Patescibacteria;c__Saccharimonadia;o__Saccharimonadales;f__UBA10212;g__;s__
1-8_bin.31	d__Bacteria;p__Proteobacteria;c__Gammaproteobacteria;o__Nevskiales;f__Nevskiaceae;g__Solimonas_A;s__
1-8_bin.32	d__Bacteria;p__Chloroflexota;c__Limnocylindria;o__P2-11E;f__P2-11E;g__JACDAF01;s__
1-8_bin.33	d__Bacteria;p__Proteobacteria;c__Gammaproteobacteria;o__Burkholderiales;f__Gallionellaceae;g__Nitrotoga;s__
1-8_bin.34	d__Bacteria;p__Actinobacteriota;c__Thermoleophilia;o__Solirubrobacterales;f__Solirubrobacteraceae;g__SEOHO-28;s__
1-8_bin.35	d__Bacteria;p__Actinobacteriota;c__UBA4738;o__AC-67;f__AC-67;g__;s__
1-8_bin.36	d__Bacteria;p__Patescibacteria;c__Saccharimonadia;o__;f__;g__;s__
1-8_bin.37	d__Bacteria;p__Bacteroidota;c__Bacteroidia;o__Chitinophagales;f__Chitinophagaceae;g__Ferruginibacter;s__
1-8_bin.38	d__Bacteria;p__Proteobacteria;c__Alphaproteobacteria;o__Sphingomonadales;f__Sphingomonadaceae;g__Allosphingosinicella;s__
1-8_bin.39	d__Bacteria;p__Actinobacteriota;c__Acidimicrobiia;o__Acidimicrobiales;f__;g__;s__
1-8_bin.4	d__Bacteria;p__Proteobacteria;c__Gammaproteobacteria;o__Xanthomonadales;f__Xanthomonadaceae;g__Lysobacter;s__
1-8_bin.42	d__Bacteria;p__Actinobacteriota;c__Actinomycetia;o__Mycobacteriales;f__SCTD01;g__;s__
1-8_bin.43	d__Bacteria;p__Patescibacteria;c__Saccharimonadia;o__Saccharimonadales;f__JACDFO01;g__;s__
1-8_bin.44	d__Bacteria;p__Actinobacteriota;c__Acidimicrobiia;o__Acidimicrobiales;f__CADCTF01;g__;s__
1-8_bin.45	d__Bacteria;p__Actinobacteriota;c__UBA4738;o__AC-67;f__AC-67;g__;s__
1-8_bin.5	d__Bacteria;p__Patescibacteria;c__Saccharimonadia;o__Saccharimonadales;f__2-12-FULL-41-12;g__;s__
1-8_bin.6	d__Bacteria;p__Actinobacteriota;c__UBA4738;o__AC-67;f__;g__;s__
1-8_bin.7	d__Bacteria;p__Proteobacteria;c__Gammaproteobacteria;o__Xanthomonadales;f__Xanthomonadaceae;g__Thermomonas;s__
1-8_bin.8	d__Bacteria;p__Nitrospirota;c__Nitrospiria;o__2-01-FULL-66-17;f__2-01-FULL-66-17;g__;s__
1-8_bin.9	d__Bacteria;p__Chloroflexota;c__Anaerolineae;o__Anaerolineales;f__EnvOPS12;g__UBA12294;s__
1-8_vamb_6729	d__Bacteria;p__Actinobacteriota;c__Acidimicrobiia;o__IMCC26256;f__;g__;s__
1-8_vamb_8486	d__Bacteria;p__Actinobacteriota;c__Actinomycetia;o__Propionibacteriales;f__Nocardioidaceae;g__Nocardioides_B;s__
1-8_vamb_8682	d__Bacteria;p__Patescibacteria;c__Microgenomatia;o__Levybacterales;f__UBA12049;g__JACDET01;s__
2-4_bin.1	d__Bacteria;p__Acidobacteriota;c__Blastocatellia;o__Pyrinomonadales;f__Pyrinomonadaceae;g__OLB17;s__
2-4_bin.10	d__Bacteria;p__Verrucomicrobiota;c__Verrucomicrobiae;o__Opitutales;f__Opitutaceae;g__Lacunisphaera;s__
2-4_bin.12	d__Bacteria;p__Proteobacteria;c__Gammaproteobacteria;o__Nevskiales;f__Nevskiaceae;g__;s__
2-4_bin.13	d__Bacteria;p__Verrucomicrobiota;c__Verrucomicrobiae;o__Pedosphaerales;f__SIBH01;g__SIBH01;s__
2-4_bin.14	d__Bacteria;p__Acidobacteriota;c__Acidobacteriae;o__Acidobacteriales;f__;g__;s__
2-4_bin.15	d__Bacteria;p__Proteobacteria;c__Gammaproteobacteria;o__REEB76;f__REEB76;g__;s__
2-4_bin.16	d__Bacteria;p__Chloroflexota;c__Limnocylindria;o__QHBO01;f__QHBO01;g__;s__
2-4_bin.18	d__Bacteria;p__Proteobacteria;c__Gammaproteobacteria;o__Steroidobacterales;f__Steroidobacteraceae;g__SCUD01;s__
2-4_bin.19	d__Bacteria;p__Planctomycetota;c__Planctomycetia;o__Pirellulales;f__Pirellulaceae;g__;s__
2-4_bin.2	d__Bacteria;p__Nitrospirota;c__Nitrospiria;o__Nitrospirales;f__Nitrospiraceae;g__Nitrospira_F;s__Nitrospira_F sp002083565
2-4_bin.20	d__Bacteria;p__Bacteroidota;c__Bacteroidia;o__Cytophagales;f__;g__;s__
2-4_bin.21	d__Bacteria;p__Bacteroidota;c__Bacteroidia;o__AKYH767;f__Palsa-965;g__GCA-2737665;s__
2-4_bin.22	d__Bacteria;p__Chloroflexota;c__Anaerolineae;o__Anaerolineales;f__EnvOPS12;g__UBA12294;s__
2-4_bin.23	d__Bacteria;p__Proteobacteria;c__Gammaproteobacteria;o__Acidiferrobacterales;f__UBA6901;g__JACREH01;s__
2-4_bin.24	d__Bacteria;p__Proteobacteria;c__Gammaproteobacteria;o__Burkholderiales;f__Burkholderiaceae;g__Hydrogenophaga;s__Hydrogenophaga sp018780385
2-4_bin.25	d__Bacteria;p__Proteobacteria;c__Alphaproteobacteria;o__Micropepsales;f__Micropepsaceae;g__SZUA-430;s__
2-4_bin.26	d__Bacteria;p__Proteobacteria;c__Gammaproteobacteria;o__Burkholderiales;f__Sulfuricellaceae_A;g__;s__
2-4_bin.27	d__Bacteria;p__Chloroflexota;c__Limnocylindria;o__Limnocylindrales;f__CSP1-4;g__UBA5189;s__
2-4_bin.28	d__Bacteria;p__Verrucomicrobiota;c__Verrucomicrobiae;o__Pedosphaerales;f__;g__;s__
2-4_bin.29	d__Bacteria;p__Chloroflexota;c__Limnocylindria;o__P2-11E;f__P2-11E;g__CF-39;s__
2-4_bin.4	d__Bacteria;p__Bacteroidota;c__Bacteroidia;o__Chitinophagales;f__Chitinophagaceae;g__Lacibacter;s__
2-4_bin.5	d__Bacteria;p__Gemmatimonadota;c__Gemmatimonadetes;o__Gemmatimonadales;f__GWC2-71-9;g__Palsa-1233;s__
2-4_bin.6	d__Bacteria;p__Proteobacteria;c__Alphaproteobacteria;o__Sphingomonadales;f__Sphingomonadaceae;g__Novosphingobium;s__
2-4_bin.9	d__Bacteria;p__Patescibacteria;c__Paceibacteria;o__UBA9983_A;f__SBAW01;g__GWA1-54-10;s__
2-56_bin.10	d__Bacteria;p__Patescibacteria;c__Paceibacteria;o__UBA9983_A;f__UBA5272;g__UBA11704;s__
2-56_bin.12	d__Bacteria;p__Chloroflexota;c__Limnocylindria;o__Limnocylindrales;f__CSP1-4;g__UBA5189;s__
2-56_bin.13	d__Bacteria;p__Proteobacteria;c__Gammaproteobacteria;o__Acidiferrobacterales;f__Sulfurifustaceae;g__Sulfuricaulis;s__
2-56_bin.14	d__Bacteria;p__Myxococcota;c__Myxococcia;o__Myxococcales;f__Anaeromyxobacteraceae;g__;s__
2-56_bin.16	d__Bacteria;p__Proteobacteria;c__Gammaproteobacteria;o__Burkholderiales;f__SG8-41;g__UBA5216;s__
2-56_bin.17	d__Bacteria;p__Proteobacteria;c__Gammaproteobacteria;o__Burkholderiales;f__Usitatibacteraceae;g__FEB-7;s__
2-56_bin.18	d__Bacteria;p__Chloroflexota;c__Anaerolineae;o__Anaerolineales;f__EnvOPS12;g__UBA12294;s__
2-56_bin.19	d__Bacteria;p__Bacteroidota;c__Bacteroidia;o__AKYH767;f__B-17BO;g__JADJDM01;s__
2-56_bin.2	d__Bacteria;p__Eisenbacteria;c__RBG-16-71-46;o__SZUA-252;f__SZUA-252;g__SZUA-252;s__
2-56_bin.21	d__Bacteria;p__Proteobacteria;c__Gammaproteobacteria;o__Burkholderiales;f__Burkholderiaceae;g__Ramlibacter;s__
2-56_bin.22	d__Bacteria;p__Acidobacteriota;c__Thermoanaerobaculia;o__Gp7-AA8;f__Gp7-AA8;g__QHVT01;s__
2-56_bin.23	d__Bacteria;p__Eisenbacteria;c__RBG-16-71-46;o__RBG-16-71-46;f__RBG-16-71-46;g__WS-11;s__
2-56_bin.24	d__Bacteria;p__Proteobacteria;c__Gammaproteobacteria;o__Pseudomonadales;f__Moraxellaceae;g__;s__
2-56_bin.25	d__Bacteria;p__Proteobacteria;c__Gammaproteobacteria;o__Steroidobacterales;f__Steroidobacteraceae;g__RPQJ01;s__
2-56_bin.26	d__Bacteria;p__Proteobacteria;c__Gammaproteobacteria;o__Burkholderiales;f__Rhodocyclaceae;g__;s__
2-56_bin.27	d__Bacteria;p__Planctomycetota;c__PLA2;o__;f__;g__;s__
2-56_bin.29	d__Bacteria;p__Proteobacteria;c__Alphaproteobacteria;o__Sphingomonadales;f__Sphingomonadaceae;g__UBA1936;s__
2-56_bin.3	d__Bacteria;p__Proteobacteria;c__Gammaproteobacteria;o__Nevskiales;f__;g__;s__
2-56_bin.30	d__Bacteria;p__Chloroflexota;c__Anaerolineae;o__Thermoflexales;f__J036;g__JADKDT01;s__
2-56_bin.32	d__Bacteria;p__Proteobacteria;c__Gammaproteobacteria;o__Burkholderiales;f__Sulfuricellaceae_A;g__;s__
2-56_bin.4	d__Bacteria;p__Nitrospirota;c__Nitrospiria;o__2-01-FULL-66-17;f__2-01-FULL-66-17;g__;s__
2-56_bin.5	d__Bacteria;p__Acidobacteriota;c__Mor1;o__Mor1;f__;g__;s__
2-56_bin.6	d__Bacteria;p__Verrucomicrobiota;c__Verrucomicrobiae;o__Pedosphaerales;f__;g__;s__
2-56_bin.8	d__Bacteria;p__Desulfobacterota;c__Desulfuromonadia;o__Geobacterales;f__Pseudopelobacteraceae;g__JACRCG01;s__
2-56_bin.9	d__Bacteria;p__Acidobacteriota;c__Mor1;o__Mor1;f__;g__;s__
2-66_bin.1	d__Bacteria;p__Proteobacteria;c__Gammaproteobacteria;o__Burkholderiales;f__RBG-16-58-11;g__;s__
2-66_bin.10	d__Bacteria;p__Bacteroidota;c__Bacteroidia;o__Cytophagales;f__Cyclobacteriaceae;g__ELB16-189;s__
2-66_bin.11	d__Bacteria;p__Acidobacteriota;c__Thermoanaerobaculia;o__UBA5704;f__UBA5704;g__JACTMI01;s__
2-66_bin.12	d__Bacteria;p__Proteobacteria;c__Gammaproteobacteria;o__Acidiferrobacterales;f__Sulfurifustaceae;g__SCRL01;s__
2-66_bin.13	d__Bacteria;p__Proteobacteria;c__Gammaproteobacteria;o__Burkholderiales;f__Burkholderiaceae;g__Rhodoferax;s__
2-66_bin.14	d__Bacteria;p__Proteobacteria;c__Gammaproteobacteria;o__Acidiferrobacterales;f__UBA6901;g__;s__
2-66_bin.15	d__Bacteria;p__Verrucomicrobiota;c__Verrucomicrobiae;o__Pedosphaerales;f__PALSA-1396;g__PALSA-1396;s__
2-66_bin.16	d__Bacteria;p__Patescibacteria;c__Paceibacteria;o__UBA9983_A;f__SBAW01;g__GWA1-54-10;s__
2-66_bin.17	d__Bacteria;p__Patescibacteria;c__Paceibacteria;o__UBA9983_A;f__Zambryskibacteraceae;g__UBA5004;s__
2-66_bin.19	d__Bacteria;p__Proteobacteria;c__Gammaproteobacteria;o__CAIRSR01;f__CAIRSR01;g__;s__
2-66_bin.2	d__Bacteria;p__Proteobacteria;c__Alphaproteobacteria;o__Micropepsales;f__Micropepsaceae;g__SZUA-430;s__
2-66_bin.20	d__Bacteria;p__Proteobacteria;c__Gammaproteobacteria;o__Pseudomonadales;f__Pseudomonadaceae;g__Pseudomonas_E;s__
2-66_bin.23	d__Bacteria;p__Actinobacteriota;c__Actinomycetia;o__Actinomycetales;f__Micrococcaceae;g__Pseudarthrobacter;s__Pseudarthrobacter sulfonivorans_A
2-66_bin.24	d__Bacteria;p__Gemmatimonadota;c__Gemmatimonadetes;o__Gemmatimonadales;f__GWC2-71-9;g__JABFSM01;s__
2-66_bin.25	d__Bacteria;p__Proteobacteria;c__Gammaproteobacteria;o__Pseudomonadales;f__Moraxellaceae;g__UBA2031;s__
2-66_bin.26	d__Bacteria;p__Chloroflexota;c__Anaerolineae;o__Anaerolineales;f__EnvOPS12;g__OLB14;s__
2-66_bin.27	d__Bacteria;p__Actinobacteriota;c__Actinomycetia;o__Propionibacteriales;f__Nocardioidaceae;g__Nocardioides;s__
2-66_bin.28	d__Bacteria;p__Proteobacteria;c__Gammaproteobacteria;o__Pseudomonadales;f__Moraxellaceae;g__;s__
2-66_bin.29	d__Bacteria;p__Proteobacteria;c__Gammaproteobacteria;o__Acidiferrobacterales;f__Sulfurifustaceae;g__Sulfuricaulis;s__
2-66_bin.4	d__Bacteria;p__Proteobacteria;c__Gammaproteobacteria;o__Burkholderiales;f__SG8-41;g__UBA5216;s__
2-66_bin.6	d__Bacteria;p__Bacteroidota;c__UBA10030;o__UBA10030;f__UBA10030;g__2-02-FULL-55-14;s__
2-66_bin.9	d__Bacteria;p__Nitrospirota;c__Nitrospiria;o__Nitrospirales;f__Nitrospiraceae;g__Palsa-1315;s__
3-26_bin.1	d__Bacteria;p__Actinobacteriota;c__Actinomycetia;o__Propionibacteriales;f__Nocardioidaceae;g__Marmoricola;s__
3-26_bin.10	d__Bacteria;p__Proteobacteria;c__Alphaproteobacteria;o__Sphingomonadales;f__Sphingomonadaceae;g__Sphingobium;s__
3-26_bin.11	d__Bacteria;p__Bacteroidota;c__Bacteroidia;o__Flavobacteriales;f__Flavobacteriaceae;g__Flavobacterium;s__
3-26_bin.13	d__Bacteria;p__Proteobacteria;c__Gammaproteobacteria;o__Xanthomonadales;f__Xanthomonadaceae;g__Lysobacter_A;s__
3-26_bin.14	d__Bacteria;p__Proteobacteria;c__Gammaproteobacteria;o__Xanthomonadales;f__Xanthomonadaceae;g__Arenimonas;s__
3-26_bin.15	d__Bacteria;p__Acidobacteriota;c__Vicinamibacteria;o__Vicinamibacterales;f__SCN-69-37;g__SYFT01;s__
3-26_bin.16	d__Bacteria;p__Proteobacteria;c__Gammaproteobacteria;o__Xanthomonadales;f__Xanthomonadaceae;g__Arenimonas;s__
3-26_bin.17	d__Bacteria;p__Patescibacteria;c__Saccharimonadia;o__Saccharimonadales;f__UBA1547;g__UBA6022;s__
3-26_bin.18	d__Bacteria;p__Proteobacteria;c__Gammaproteobacteria;o__Nevskiales;f__Nevskiaceae;g__Stagnimonas;s__
3-26_bin.19	d__Bacteria;p__Patescibacteria;c__Saccharimonadia;o__Saccharimonadales;f__UBA5946;g__;s__
3-26_bin.2	d__Bacteria;p__Acidobacteriota;c__Blastocatellia;o__Pyrinomonadales;f__Pyrinomonadaceae;g__QHXM01;s__
3-26_bin.20	d__Bacteria;p__Proteobacteria;c__Gammaproteobacteria;o__Burkholderiales;f__Burkholderiaceae;g__Massilia;s__Massilia sp900129765
3-26_bin.3	d__Bacteria;p__Proteobacteria;c__Alphaproteobacteria;o__Sphingomonadales;f__Sphingomonadaceae;g__Allosphingosinicella;s__
3-26_bin.4	d__Bacteria;p__Actinobacteriota;c__Actinomycetia;o__Propionibacteriales;f__Nocardioidaceae;g__Marmoricola;s__
3-26_bin.5	d__Bacteria;p__Proteobacteria;c__Alphaproteobacteria;o__Caulobacterales;f__Caulobacteraceae;g__Caulobacter;s__
3-26_bin.6	d__Bacteria;p__Acidobacteriota;c__Thermoanaerobaculia;o__UBA5066;f__Gp7-AA6;g__Gp7-AA6;s__
3-26_bin.8	d__Bacteria;p__Patescibacteria;c__Saccharimonadia;o__Saccharimonadales;f__2-12-FULL-41-12;g__;s__
3-26_bin.9	d__Bacteria;p__Proteobacteria;c__Gammaproteobacteria;o__Burkholderiales;f__Burkholderiaceae;g__JACCZX01;s__
3-26_vamb_9119	d__Bacteria;p__Bacteroidota;c__Bacteroidia;o__Flavobacteriales;f__Flavobacteriaceae;g__Flavobacterium;s__
3-4_bin.10	d__Bacteria;p__Acidobacteriota;c__Thermoanaerobaculia;o__Gp7-AA8;f__Gp7-AA8;g__QHVT01;s__
3-4_bin.11	d__Bacteria;p__Proteobacteria;c__Gammaproteobacteria;o__Steroidobacterales;f__Steroidobacteraceae;g__SCUD01;s__
3-4_bin.12	d__Bacteria;p__Bacteroidota;c__Bacteroidia;o__Flavobacteriales;f__Flavobacteriaceae;g__Flavobacterium;s__
3-4_bin.13	d__Bacteria;p__Proteobacteria;c__Gammaproteobacteria;o__Burkholderiales;f__Burkholderiaceae;g__Massilia;s__
3-4_bin.14	d__Bacteria;p__Proteobacteria;c__Gammaproteobacteria;o__Xanthomonadales;f__Xanthomonadaceae;g__Arenimonas;s__
3-4_bin.15	d__Bacteria;p__Actinobacteriota;c__Actinomycetia;o__Propionibacteriales;f__Nocardioidaceae;g__Marmoricola;s__
3-4_bin.16	d__Bacteria;p__Bacteroidota;c__Bacteroidia;o__Sphingobacteriales;f__Sphingobacteriaceae;g__Mucilaginibacter;s__
3-4_bin.18	d__Bacteria;p__Bacteroidota;c__Bacteroidia;o__Flavobacteriales;f__Flavobacteriaceae;g__Flavobacterium;s__
3-4_bin.19	d__Bacteria;p__Bacteroidota;c__Bacteroidia;o__AKYH767;f__B-17BO;g__UBA4416;s__
3-4_bin.2	d__Bacteria;p__Proteobacteria;c__Gammaproteobacteria;o__Burkholderiales;f__Burkholderiaceae;g__CAIMXF01;s__
3-4_bin.20	d__Bacteria;p__Patescibacteria;c__Paceibacteria;o__UBA9983_A;f__UBA6065;g__UBA6065;s__
3-4_bin.3	d__Bacteria;p__Actinobacteriota;c__Actinomycetia;o__Actinomycetales;f__Micrococcaceae;g__Pseudarthrobacter;s__Pseudarthrobacter sulfonivorans_A
3-4_bin.4	d__Bacteria;p__Proteobacteria;c__Alphaproteobacteria;o__Rhizobiales;f__Aestuariivirgaceae;g__Aestuariivirga;s__
3-4_bin.5	d__Bacteria;p__Gemmatimonadota;c__Gemmatimonadetes;o__Gemmatimonadales;f__Gemmatimonadaceae;g__UBA4720;s__
3-4_bin.6	d__Bacteria;p__Zixibacteria;c__MSB-5A5;o__DSPP01;f__WJJR01;g__JACQFV01;s__
3-4_bin.9	d__Bacteria;p__Acidobacteriota;c__Vicinamibacteria;o__Vicinamibacterales;f__UBA2999;g__JAENWD01;s__
3-5_bin.1	d__Bacteria;p__Acidobacteriota;c__Thermoanaerobaculia;o__Gp7-AA8;f__Gp7-AA8;g__QHVT01;s__
3-5_bin.10	d__Bacteria;p__Actinobacteriota;c__Thermoleophilia;o__Solirubrobacterales;f__70-9;g__;s__
3-5_bin.11	d__Bacteria;p__Proteobacteria;c__Gammaproteobacteria;o__Acidiferrobacterales;f__UBA6901;g__UBA6901;s__
3-5_bin.12	d__Bacteria;p__Proteobacteria;c__Gammaproteobacteria;o__Burkholderiales;f__Burkholderiaceae;g__Massilia;s__
3-5_bin.13	d__Bacteria;p__Acidobacteriota;c__Blastocatellia;o__Pyrinomonadales;f__Pyrinomonadaceae;g__UBA11740;s__
3-5_bin.2	d__Bacteria;p__Proteobacteria;c__Gammaproteobacteria;o__Burkholderiales;f__SG8-39;g__;s__
3-5_bin.4	d__Bacteria;p__Proteobacteria;c__Alphaproteobacteria;o__Sphingomonadales;f__Sphingomonadaceae;g__Novosphingobium;s__
3-5_bin.6	d__Bacteria;p__Proteobacteria;c__Gammaproteobacteria;o__Burkholderiales;f__Burkholderiaceae;g__Polaromonas;s__
3-5_bin.7	d__Bacteria;p__Proteobacteria;c__Gammaproteobacteria;o__Xanthomonadales;f__Xanthomonadaceae;g__Arenimonas;s__
3-5_bin.8	d__Bacteria;p__Acidobacteriota;c__Acidobacteriae;o__;f__;g__;s__
3-5_bin.9	d__Bacteria;p__Proteobacteria;c__Gammaproteobacteria;o__Burkholderiales;f__Burkholderiaceae;g__CADEEN01;s__
4-2_bin.1	d__Bacteria;p__Proteobacteria;c__Gammaproteobacteria;o__Burkholderiales;f__Usitatibacteraceae;g__Usitatibacter;s__
4-2_bin.10	d__Bacteria;p__Acidobacteriota;c__Acidobacteriae;o__Acidoferrales;f__UBA7541;g__Palsa-360;s__
4-2_bin.12	d__Bacteria;p__Acidobacteriota;c__Acidobacteriae;o__Acidobacteriales;f__Acidobacteriaceae;g__Terracidiphilus;s__
4-2_bin.13	d__Bacteria;p__Actinobacteriota;c__Thermoleophilia;o__Solirubrobacterales;f__Solirubrobacteraceae;g__Palsa-744;s__
4-2_bin.14	d__Bacteria;p__Chloroflexota;c__Limnocylindria;o__Limnocylindrales;f__CSP1-4;g__;s__
4-2_bin.2	d__Bacteria;p__Acidobacteriota;c__Blastocatellia;o__Pyrinomonadales;f__Pyrinomonadaceae;g__OLB17;s__
4-2_bin.4	d__Bacteria;p__Actinobacteriota;c__Acidimicrobiia;o__Acidimicrobiales;f__Ilumatobacteraceae;g__JAENVT01;s__
4-2_bin.5	d__Bacteria;p__Gemmatimonadota;c__Gemmatimonadetes;o__Gemmatimonadales;f__GWC2-71-9;g__JACDDX01;s__
4-2_bin.6	d__Bacteria;p__Proteobacteria;c__Gammaproteobacteria;o__Pseudomonadales;f__Pseudomonadaceae;g__Pseudomonas_E;s__Pseudomonas_E fluorescens_W
4-2_bin.7	d__Bacteria;p__Nitrospirota;c__Nitrospiria;o__Nitrospirales;f__Nitrospiraceae;g__Palsa-1315;s__
4-2_bin.8	d__Bacteria;p__Planctomycetota;c__GCA-002687715;o__GCA-002687715;f__CAIWVZ01;g__;s__
4-2_bin.9	d__Bacteria;p__Methylomirabilota;c__Methylomirabilia;o__Rokubacteriales;f__CSP1-6;g__;s__
4-6_bin.1	d__Bacteria;p__Proteobacteria;c__Gammaproteobacteria;o__Acidiferrobacterales;f__UBA6901;g__;s__
4-6_bin.10	d__Bacteria;p__Proteobacteria;c__Gammaproteobacteria;o__Xanthomonadales;f__Xanthomonadaceae;g__Arenimonas;s__
4-6_bin.11	d__Bacteria;p__Eisenbacteria;c__RBG-16-71-46;o__RBG-16-71-46;f__RBG-16-71-46;g__WS-8;s__
4-6_bin.12	d__Bacteria;p__Acidobacteriota;c__Blastocatellia;o__Pyrinomonadales;f__Pyrinomonadaceae;g__PSRF01;s__
4-6_bin.13	d__Bacteria;p__Gemmatimonadota;c__Gemmatimonadetes;o__Gemmatimonadales;f__Gemmatimonadaceae;g__UBA4720;s__
4-6_bin.14	d__Bacteria;p__Bacteroidota;c__Bacteroidia;o__Flavobacteriales;f__Flavobacteriaceae;g__Flavobacterium;s__
4-6_bin.15	d__Bacteria;p__Proteobacteria;c__Gammaproteobacteria;o__Xanthomonadales;f__Xanthomonadaceae;g__Arenimonas;s__
4-6_bin.16	d__Bacteria;p__Bacteroidota;c__Bacteroidia;o__Flavobacteriales;f__Flavobacteriaceae;g__Flavobacterium;s__
4-6_bin.17	d__Bacteria;p__Actinobacteriota;c__Acidimicrobiia;o__Acidimicrobiales;f__Ilumatobacteraceae;g__JAENVT01;s__
4-6_bin.18	d__Bacteria;p__Chloroflexota;c__Anaerolineae;o__Anaerolineales;f__UBA6663;g__;s__
4-6_bin.19	d__Bacteria;p__Bacteroidota;c__Bacteroidia;o__Flavobacteriales;f__Crocinitomicaceae;g__;s__
4-6_bin.2	d__Bacteria;p__Proteobacteria;c__Gammaproteobacteria;o__Burkholderiales;f__SG8-39;g__;s__
4-6_bin.20	d__Bacteria;p__Proteobacteria;c__Gammaproteobacteria;o__Steroidobacterales;f__Steroidobacteraceae;g__FEN-1191;s__
4-6_bin.21	d__Bacteria;p__Patescibacteria;c__Paceibacteria;o__UBA9983_A;f__DSPV01;g__;s__
4-6_bin.3	d__Bacteria;p__Nitrospirota;c__Nitrospiria;o__Nitrospirales;f__Nitrospiraceae;g__Palsa-1315;s__
4-6_bin.4	d__Bacteria;p__Acidobacteriota;c__Mor1;o__Mor1;f__;g__;s__
4-6_bin.5	d__Bacteria;p__Acidobacteriota;c__Acidobacteriae;o__Acidobacteriales;f__SbA1;g__QIAJ01;s__
4-6_bin.7	d__Bacteria;p__Bacteroidota;c__Bacteroidia;o__Flavobacteriales;f__Crocinitomicaceae;g__;s__
4-6_bin.8	d__Bacteria;p__Proteobacteria;c__Alphaproteobacteria;o__Rhizobiales;f__Aestuariivirgaceae;g__Aestuariivirga;s__
4-6_bin.9	d__Bacteria;p__Armatimonadota;c__Fimbriimonadia;o__Fimbriimonadales;f__ATM1;g__JACDEQ01;s__
4-7_bin.1	d__Bacteria;p__Proteobacteria;c__Gammaproteobacteria;o__Burkholderiales;f__Burkholderiaceae;g__Janthinobacterium;s__
4-7_bin.2	d__Bacteria;p__Proteobacteria;c__Alphaproteobacteria;o__Rhizobiales;f__Xanthobacteraceae;g__Bradyrhizobium;s__
4-7_bin.3	d__Bacteria;p__Chloroflexota;c__Limnocylindria;o__Limnocylindrales;f__CSP1-4;g__Chersky-267;s__
4-7_bin.4	d__Bacteria;p__Proteobacteria;c__Gammaproteobacteria;o__Steroidobacterales;f__Steroidobacteraceae;g__FEN-1191;s__
4-7_bin.5	d__Bacteria;p__Acidobacteriota;c__Acidobacteriae;o__Acidoferrales;f__UBA7541;g__Palsa-360;s__
4-7_bin.6	d__Bacteria;p__Acidobacteriota;c__Acidobacteriae;o__Acidobacteriales;f__SbA1;g__;s__
5-5_bin.1	d__Bacteria;p__Proteobacteria;c__Alphaproteobacteria;o__Sphingomonadales;f__Sphingomonadaceae;g__Sphingorhabdus_B;s__
5-5_bin.2	d__Bacteria;p__Actinobacteriota;c__Actinomycetia;o__Actinomycetales;f__Micrococcaceae;g__Arthrobacter_I;s__
5-6_bin.1	d__Bacteria;p__Methylomirabilota;c__Methylomirabilia;o__Rokubacteriales;f__CSP1-6;g__;s__
5-6_bin.11	d__Bacteria;p__Proteobacteria;c__Gammaproteobacteria;o__Burkholderiales;f__Burkholderiaceae;g__DSNY01;s__
5-6_bin.12	d__Bacteria;p__Proteobacteria;c__Gammaproteobacteria;o__Steroidobacterales;f__Steroidobacteraceae;g__FEN-1191;s__
5-6_bin.13	d__Bacteria;p__Acidobacteriota;c__Acidobacteriae;o__Acidobacteriales;f__SbA1;g__JABCYV01;s__
5-6_bin.15	d__Bacteria;p__Nitrospirota;c__Nitrospiria;o__Nitrospirales;f__Nitrospiraceae;g__Palsa-1315;s__
5-6_bin.16	d__Bacteria;p__Proteobacteria;c__Alphaproteobacteria;o__Sphingomonadales;f__Sphingomonadaceae;g__Allosphingosinicella;s__
5-6_bin.2	d__Bacteria;p__Acidobacteriota;c__Thermoanaerobaculia;o__Gp7-AA8;f__Gp7-AA8;g__JADGNZ01;s__
5-6_bin.4	d__Bacteria;p__Verrucomicrobiota;c__Verrucomicrobiae;o__Pedosphaerales;f__Pedosphaeraceae;g__;s__
5-6_bin.5	d__Bacteria;p__Proteobacteria;c__Alphaproteobacteria;o__Rhizobiales;f__Xanthobacteraceae;g__Z2-YC6860;s__
5-6_bin.6	d__Bacteria;p__Actinobacteriota;c__Thermoleophilia;o__Solirubrobacterales;f__Solirubrobacteraceae;g__Palsa-744;s__
5-6_bin.7	d__Bacteria;p__Patescibacteria;c__Paceibacteria;o__UBA9983_A;f__UBA9973;g__UBA9973;s__
5-6_bin.8	d__Bacteria;p__Proteobacteria;c__Alphaproteobacteria;o__Micropepsales;f__Micropepsaceae;g__;s__
5-6_bin.9	d__Bacteria;p__Proteobacteria;c__Gammaproteobacteria;o__Steroidobacterales;f__Steroidobacteraceae;g__Bog-1198;s__
5-7_bin.1	d__Bacteria;p__Methylomirabilota;c__Methylomirabilia;o__Rokubacteriales;f__CSP1-6;g__;s__
5-7_bin.10	d__Bacteria;p__Proteobacteria;c__Gammaproteobacteria;o__Steroidobacterales;f__Steroidobacteraceae;g__FEN-1191;s__
5-7_bin.11	d__Bacteria;p__Proteobacteria;c__Gammaproteobacteria;o__Pseudomonadales;f__Pseudomonadaceae;g__Pseudomonas_E;s__
5-7_bin.13	d__Bacteria;p__Proteobacteria;c__Alphaproteobacteria;o__Sphingomonadales;f__Sphingomonadaceae;g__Allosphingosinicella;s__
5-7_bin.14	d__Bacteria;p__Proteobacteria;c__Gammaproteobacteria;o__Burkholderiales;f__Burkholderiaceae;g__CAIMXF01;s__
5-7_bin.15	d__Bacteria;p__Nitrospirota;c__Nitrospiria;o__Nitrospirales;f__Nitrospiraceae;g__Palsa-1315;s__
5-7_bin.16	d__Bacteria;p__Proteobacteria;c__Gammaproteobacteria;o__Burkholderiales;f__Usitatibacteraceae;g__Usitatibacter;s__
5-7_bin.17	d__Bacteria;p__Proteobacteria;c__Gammaproteobacteria;o__Burkholderiales;f__Burkholderiaceae;g__Collimonas;s__
5-7_bin.18	d__Bacteria;p__Actinobacteriota;c__Acidimicrobiia;o__IMCC26256;f__PALSA-555;g__;s__
5-7_bin.19	d__Bacteria;p__Gemmatimonadota;c__Gemmatimonadetes;o__Gemmatimonadales;f__GWC2-71-9;g__;s__
5-7_bin.2	d__Bacteria;p__Gemmatimonadota;c__Gemmatimonadetes;o__Gemmatimonadales;f__GWC2-71-9;g__20CM-2-65-7;s__
5-7_bin.20	d__Bacteria;p__Chloroflexota;c__Limnocylindria;o__Limnocylindrales;f__CSP1-4;g__SPCO01;s__
5-7_bin.21	d__Bacteria;p__Actinobacteriota;c__Actinomycetia;o__Actinomycetales;f__Micrococcaceae;g__Arthrobacter_I;s__
5-7_bin.24	d__Bacteria;p__Gemmatimonadota;c__Gemmatimonadetes;o__Gemmatimonadales;f__Gemmatimonadaceae;g__UBA4720;s__
5-7_bin.25	d__Bacteria;p__Bdellovibrionota;c__Bdellovibrionia_A;o__UBA1018;f__UBA1018;g__;s__
5-7_bin.26	d__Bacteria;p__Proteobacteria;c__Gammaproteobacteria;o__Steroidobacterales;f__Steroidobacteraceae;g__Bog-1198;s__
5-7_bin.3	d__Bacteria;p__Proteobacteria;c__Alphaproteobacteria;o__Sphingomonadales;f__Sphingomonadaceae;g__Sphingomicrobium;s__
5-7_bin.4	d__Bacteria;p__Acidobacteriota;c__Blastocatellia;o__Pyrinomonadales;f__Pyrinomonadaceae;g__UBA11740;s__
5-7_bin.5	d__Bacteria;p__Desulfobacterota_B;c__Binatia;o__UBA9968;f__UBA9968;g__DP-20;s__
5-7_bin.6	d__Bacteria;p__Verrucomicrobiota;c__Verrucomicrobiae;o__Chthoniobacterales;f__UBA10450;g__Palsa-1382;s__
5-7_bin.7	d__Bacteria;p__Patescibacteria;c__Paceibacteria;o__UBA6257;f__2-01-FULL-56-20;g__;s__
5-7_bin.8	d__Bacteria;p__Proteobacteria;c__Gammaproteobacteria;o__Burkholderiales;f__SG8-39;g__RBG-16-66-20;s__
5-7_bin.9	d__Bacteria;p__Acidobacteriota;c__Acidobacteriae;o__Acidobacteriales;f__SbA1;g__;s__
6-2_bin.1	d__Bacteria;p__Acidobacteriota;c__Blastocatellia;o__UBA7656;f__UBA7656;g__JADGNW01;s__
6-2_bin.12	d__Bacteria;p__Proteobacteria;c__Alphaproteobacteria;o__Rhizobiales;f__Xanthobacteraceae;g__Z2-YC6860;s__
6-2_bin.13	d__Bacteria;p__Proteobacteria;c__Gammaproteobacteria;o__Steroidobacterales;f__Steroidobacteraceae;g__;s__
6-2_bin.14	d__Bacteria;p__Acidobacteriota;c__Mor1;o__Mor1;f__;g__;s__
6-2_bin.15	d__Bacteria;p__Proteobacteria;c__Gammaproteobacteria;o__Burkholderiales;f__SG8-39;g__VBDM01;s__
6-2_bin.16	d__Bacteria;p__Proteobacteria;c__Alphaproteobacteria;o__Rhizobiales;f__Xanthobacteraceae;g__Z2-YC6860;s__
6-2_bin.17	d__Bacteria;p__Proteobacteria;c__Gammaproteobacteria;o__Burkholderiales;f__SG8-40;g__JACQAP01;s__
6-2_bin.4	d__Bacteria;p__Actinobacteriota;c__Actinomycetia;o__Actinomycetales;f__Micrococcaceae;g__Arthrobacter_I;s__
6-2_bin.6	d__Bacteria;p__Acidobacteriota;c__Blastocatellia;o__Pyrinomonadales;f__Pyrinomonadaceae;g__PSRF01;s__
6-2_bin.9	d__Bacteria;p__Nitrospirota;c__Nitrospiria;o__Nitrospirales;f__Nitrospiraceae;g__Palsa-1315;s__
6-3_bin.1	d__Bacteria;p__Proteobacteria;c__Alphaproteobacteria;o__Micropepsales;f__Micropepsaceae;g__;s__
6-3_bin.2	d__Bacteria;p__Proteobacteria;c__Gammaproteobacteria;o__Steroidobacterales;f__Steroidobacteraceae;g__13-2-20CM-66-19;s__
6-3_bin.3	d__Bacteria;p__Actinobacteriota;c__UBA4738;o__UBA4738;f__HRBIN12;g__AC-51;s__
6-3_bin.4	d__Bacteria;p__Methylomirabilota;c__Methylomirabilia;o__Rokubacteriales;f__CSP1-6;g__;s__
6-3_bin.5	d__Bacteria;p__Acidobacteriota;c__Blastocatellia;o__Pyrinomonadales;f__Pyrinomonadaceae;g__UBA11740;s__
6-3_bin.6	d__Bacteria;p__Acidobacteriota;c__Blastocatellia;o__UBA7656;f__UBA7656;g__JADGNW01;s__
6-3_bin.8	d__Bacteria;p__Acidobacteriota;c__Blastocatellia;o__Pyrinomonadales;f__Pyrinomonadaceae;g__PSRF01;s__
6-3_bin.9	d__Bacteria;p__Gemmatimonadota;c__Gemmatimonadetes;o__Gemmatimonadales;f__GWC2-71-9;g__AG25;s__
6-3_vamb_24029	d__Bacteria;p__Acidobacteriota;c__Acidobacteriae;o__Acidobacteriales;f__SbA1;g__Gp1-AA133;s__
6-4_bin.1	d__Bacteria;p__CSP1-3;c__CSP1-3;o__CSP1-3;f__CSP1-3;g__JACQHU01;s__
6-4_bin.11	d__Bacteria;p__Proteobacteria;c__Gammaproteobacteria;o__Burkholderiales;f__Leeiaceae;g__;s__
6-4_bin.12	d__Bacteria;p__Actinobacteriota;c__Thermoleophilia;o__Gaiellales;f__Gaiellaceae;g__Palsa-739;s__
6-4_bin.15	d__Bacteria;p__Actinobacteriota;c__Thermoleophilia;o__Solirubrobacterales;f__Solirubrobacteraceae;g__Palsa-744;s__
6-4_bin.16	d__Bacteria;p__Proteobacteria;c__Gammaproteobacteria;o__Burkholderiales;f__SG8-40;g__JACQAP01;s__
6-4_bin.17	d__Bacteria;p__Proteobacteria;c__Alphaproteobacteria;o__Caulobacterales;f__TH1-2;g__Terricaulis;s__
6-4_bin.2	d__Bacteria;p__Eisenbacteria;c__RBG-16-71-46;o__SZUA-252;f__SZUA-252;g__WS-9;s__
6-4_bin.4	d__Bacteria;p__Acidobacteriota;c__Acidobacteriae;o__Acidobacteriales;f__DSPA01;g__DSPA01;s__
6-4_bin.5	d__Bacteria;p__Acidobacteriota;c__Thermoanaerobaculia;o__UBA5066;f__Gp7-AA6;g__Gp7-AA6;s__
6-4_bin.6	d__Bacteria;p__Proteobacteria;c__Gammaproteobacteria;o__Pseudomonadales;f__Moraxellaceae;g__Aquirhabdus;s__
6-4_bin.9	d__Bacteria;p__Proteobacteria;c__Gammaproteobacteria;o__Steroidobacterales;f__Steroidobacteraceae;g__13-2-20CM-66-19;s__
7-1_bin.1	d__Bacteria;p__Bacteroidota;c__Bacteroidia;o__Flavobacteriales;f__Flavobacteriaceae;g__Flavobacterium;s__
7-1_bin.10	d__Bacteria;p__Bacteroidota;c__Bacteroidia;o__AKYH767;f__B-17BO;g__JADJDM01;s__
7-1_bin.11	d__Bacteria;p__Methylomirabilota;c__Methylomirabilia;o__Rokubacteriales;f__CSP1-6;g__;s__
7-1_bin.12	d__Bacteria;p__Proteobacteria;c__Gammaproteobacteria;o__Burkholderiales;f__Burkholderiaceae;g__CADEEN01;s__
7-1_bin.14	d__Bacteria;p__Proteobacteria;c__Gammaproteobacteria;o__Burkholderiales;f__Burkholderiaceae;g__Massilia;s__
7-1_bin.15	d__Bacteria;p__Eisenbacteria;c__RBG-16-71-46;o__RBG-16-71-46;f__RBG-16-71-46;g__CAIXRL01;s__
7-1_bin.16	d__Bacteria;p__Desulfobacterota;c__Desulfuromonadia;o__Geobacterales;f__Pseudopelobacteraceae;g__CAIPTY01;s__
7-1_bin.17	d__Bacteria;p__Proteobacteria;c__Gammaproteobacteria;o__Steroidobacterales;f__Steroidobacteraceae;g__FEN-1191;s__
7-1_bin.2	d__Bacteria;p__Acidobacteriota;c__Vicinamibacteria;o__Fen-336;f__Fen-336;g__CADEEV01;s__
7-1_bin.3	d__Bacteria;p__Gemmatimonadota;c__Gemmatimonadetes;o__Gemmatimonadales;f__JACORV01;g__;s__
7-1_bin.4	d__Bacteria;p__Gemmatimonadota;c__Gemmatimonadetes;o__Gemmatimonadales;f__Gemmatimonadaceae;g__UBA4720;s__
7-1_bin.5	d__Bacteria;p__Bacteroidota;c__Bacteroidia;o__AKYH767;f__B-17BO;g__UBA4416;s__
7-1_bin.7	d__Bacteria;p__Bacteroidota;c__Bacteroidia;o__Flavobacteriales;f__Flavobacteriaceae;g__Flavobacterium;s__
7-1_bin.8	d__Bacteria;p__Patescibacteria;c__Saccharimonadia;o__Saccharimonadales;f__UBA4665;g__PMNU01;s__
7-1_bin.9	d__Bacteria;p__Acidobacteriota;c__Vicinamibacteria;o__Vicinamibacterales;f__UBA2999;g__Gp6-AA40;s__
7-1_vamb_12200	d__Bacteria;p__Bacteroidota;c__Bacteroidia;o__Flavobacteriales;f__Flavobacteriaceae;g__Flavobacterium;s__
7-2_bin.1	d__Bacteria;p__Proteobacteria;c__Gammaproteobacteria;o__Steroidobacterales;f__Steroidobacteraceae;g__;s__
7-2_bin.10	d__Bacteria;p__Acidobacteriota;c__Acidobacteriae;o__Acidoferrales;f__UBA7541;g__Palsa-295;s__
7-2_bin.11	d__Bacteria;p__Proteobacteria;c__Alphaproteobacteria;o__ATCC43930;f__Stellaceae;g__Aliidongia;s__
7-2_bin.13	d__Bacteria;p__Methylomirabilota;c__Methylomirabilia;o__Rokubacteriales;f__CSP1-6;g__;s__
7-2_bin.14	d__Bacteria;p__Proteobacteria;c__Alphaproteobacteria;o__Rhizobiales;f__Xanthobacteraceae;g__Z2-YC6860;s__
7-2_bin.15	d__Bacteria;p__Gemmatimonadota;c__Gemmatimonadetes;o__Gemmatimonadales;f__Gemmatimonadaceae;g__UBA4720;s__
7-2_bin.17	d__Bacteria;p__Proteobacteria;c__Gammaproteobacteria;o__Pseudomonadales;f__Pseudomonadaceae;g__Pseudomonas_E;s__
7-2_bin.18	d__Bacteria;p__Acidobacteriota;c__Acidobacteriae;o__Acidoferrales;f__UBA7541;g__;s__
7-2_bin.19	d__Bacteria;p__Bacteroidota;c__Bacteroidia;o__Chitinophagales;f__Chitinophagaceae;g__Puia;s__
7-2_bin.2	d__Bacteria;p__Tectomicrobia;c__Entotheonellia;o__Entotheonellales;f__Entotheonellaceae;g__SXND01;s__
7-2_bin.20	d__Bacteria;p__Acidobacteriota;c__Acidobacteriae;o__Acidobacteriales;f__SbA1;g__Sulfotelmatobacter;s__
7-2_bin.3	d__Bacteria;p__Proteobacteria;c__Alphaproteobacteria;o__Micropepsales;f__Micropepsaceae;g__;s__
7-2_bin.4	d__Bacteria;p__Verrucomicrobiota;c__Verrucomicrobiae;o__Methylacidiphilales;f__UBA1321;g__JABDGH01;s__
7-2_bin.5	d__Bacteria;p__Acidobacteriota;c__Acidobacteriae;o__Acidobacteriales;f__Acidobacteriaceae;g__Edaphobacter;s__
7-2_bin.6	d__Bacteria;p__Actinobacteriota;c__Thermoleophilia;o__Solirubrobacterales;f__Solirubrobacteraceae;g__Palsa-744;s__
7-2_bin.7	d__Bacteria;p__Proteobacteria;c__Alphaproteobacteria;o__Reyranellales;f__Reyranellaceae;g__;s__
7-2_bin.8	d__Bacteria;p__Proteobacteria;c__Gammaproteobacteria;o__Burkholderiales;f__Burkholderiaceae;g__Paraburkholderia;s__
7-2_bin.9	d__Bacteria;p__Acidobacteriota;c__Acidobacteriae;o__Acidoferrales;f__UBA7541;g__Acidoferrum;s__
7-2_vamb_4504	d__Bacteria;p__Proteobacteria;c__Gammaproteobacteria;o__Burkholderiales;f__Burkholderiaceae;g__Janthinobacterium;s__
7-6_bin.1	d__Bacteria;p__Patescibacteria;c__Paceibacteria;o__UBA9983_A;f__UBA6899;g__;s__
7-6_bin.11	d__Bacteria;p__Proteobacteria;c__Gammaproteobacteria;o__Burkholderiales;f__SG8-39;g__VBDM01;s__
7-6_bin.12	d__Bacteria;p__Proteobacteria;c__Gammaproteobacteria;o__Burkholderiales;f__Burkholderiaceae;g__Collimonas;s__
7-6_bin.2	d__Bacteria;p__Proteobacteria;c__Gammaproteobacteria;o__Burkholderiales;f__Burkholderiaceae;g__;s__
7-6_bin.4	d__Bacteria;p__Chloroflexota;c__Limnocylindria;o__QHBO01;f__QHBO01;g__CF-167;s__
7-6_bin.5	d__Bacteria;p__Actinobacteriota;c__UBA4738;o__UBA4738;f__HRBIN12;g__AC-51;s__
7-6_bin.6	d__Bacteria;p__Patescibacteria;c__Paceibacteria;o__UBA9983_A;f__UBA2100;g__UBA10103;s__
7-6_bin.7	d__Bacteria;p__Proteobacteria;c__Gammaproteobacteria;o__Burkholderiales;f__SG8-39;g__RBG-16-66-20;s__
7-6_bin.8	d__Bacteria;p__Patescibacteria;c__Paceibacteria;o__UBA9983_A;f__CAJBRS01;g__;s__
7-6_bin.9	d__Bacteria;p__Acidobacteriota;c__Acidobacteriae;o__Acidoferrales;f__UBA7541;g__Palsa-360;s__
7-6_vamb_11278	d__Bacteria;p__Acidobacteriota;c__Blastocatellia;o__UBA7656;f__UBA7656;g__JADGNW01;s__
8-3_bin.1	d__Bacteria;p__Proteobacteria;c__Gammaproteobacteria;o__Burkholderiales;f__Burkholderiaceae;g__Variovorax;s__
8-3_bin.2	d__Bacteria;p__Proteobacteria;c__Gammaproteobacteria;o__Steroidobacterales;f__Steroidobacteraceae;g__FEN-1191;s__
8-3_bin.3	d__Bacteria;p__Patescibacteria;c__Paceibacteria;o__UBA9983_A;f__UBA2103;g__C7867-001;s__
8-4_bin.1	d__Bacteria;p__Acidobacteriota;c__Blastocatellia;o__Chloracidobacteriales;f__Chloracidobacteriaceae;g__;s__
8-4_bin.10	d__Bacteria;p__Desulfobacterota_B;c__Binatia;o__HRBIN30;f__JAGDMS01;g__;s__
8-4_bin.12	d__Bacteria;p__Tectomicrobia;c__Entotheonellia;o__Entotheonellales;f__Entotheonellaceae;g__SXND01;s__
8-4_bin.14	d__Bacteria;p__Verrucomicrobiota;c__Verrucomicrobiae;o__Chthoniobacterales;f__UBA10450;g__AV80;s__
8-4_bin.15	d__Bacteria;p__Gemmatimonadota;c__Gemmatimonadetes;o__Gemmatimonadales;f__GWC2-71-9;g__40CM-2-70-7;s__
8-4_bin.17	d__Bacteria;p__Desulfobacterota_B;c__Binatia;o__JACPRU01;f__JACPRU01;g__;s__
8-4_bin.18	d__Bacteria;p__Proteobacteria;c__Alphaproteobacteria;o__Rhizobiales;f__Xanthobacteraceae;g__;s__
8-4_bin.19	d__Bacteria;p__Proteobacteria;c__Gammaproteobacteria;o__Burkholderiales;f__Burkholderiaceae;g__Glaciimonas;s__
8-4_bin.2	d__Bacteria;p__Bacteroidota;c__UBA10030;o__UBA10030;f__SZUA-254;g__VBOC01;s__
8-4_bin.20	d__Bacteria;p__Actinobacteriota;c__Acidimicrobiia;o__IMCC26256;f__PALSA-610;g__;s__
8-4_bin.22	d__Bacteria;p__Nitrospirota;c__Nitrospiria;o__Nitrospirales;f__Nitrospiraceae;g__Palsa-1315;s__
8-4_bin.23	d__Bacteria;p__Acidobacteriota;c__Blastocatellia;o__Pyrinomonadales;f__Pyrinomonadaceae;g__UBA11740;s__
8-4_bin.25	d__Bacteria;p__Methylomirabilota;c__Methylomirabilia;o__Rokubacteriales;f__CSP1-6;g__;s__
8-4_bin.3	d__Bacteria;p__Desulfobacterota_B;c__Binatia;o__Bin18;f__Bin18;g__;s__
8-4_bin.4	d__Bacteria;p__Acidobacteriota;c__Thermoanaerobaculia;o__UBA5066;f__Gp7-AA6;g__;s__
8-4_bin.5	d__Bacteria;p__Verrucomicrobiota;c__Verrucomicrobiae;o__Chthoniobacterales;f__UBA10450;g__AV40;s__
8-4_bin.6	d__Bacteria;p__Proteobacteria;c__Alphaproteobacteria;o__Micropepsales;f__Micropepsaceae;g__;s__
8-4_bin.7	d__Bacteria;p__Acidobacteriota;c__Thermoanaerobaculia;o__Gp7-AA8;f__Gp7-AA8;g__JADGNZ01;s__
8-4_bin.8	d__Bacteria;p__Proteobacteria;c__Gammaproteobacteria;o__Burkholderiales;f__Burkholderiaceae;g__Albitalea;s__
8-4_bin.9	d__Bacteria;p__Planctomycetota;c__Phycisphaerae;o__UBA1845;f__UTPLA1;g__JAFGQA01;s__
8-5_bin.10	d__Bacteria;p__Myxococcota;c__Polyangia;o__Palsa-1104;f__Palsa-1104;g__;s__
8-5_bin.11	d__Bacteria;p__Gemmatimonadota;c__Gemmatimonadetes;o__Gemmatimonadales;f__GWC2-71-9;g__JACDDX01;s__
8-5_bin.12	d__Bacteria;p__Chloroflexota;c__Limnocylindria;o__P2-11E;f__P2-11E;g__CF-39;s__
8-5_bin.13	d__Bacteria;p__Gemmatimonadota;c__Gemmatimonadetes;o__Gemmatimonadales;f__GWC2-71-9;g__;s__
8-5_bin.14	d__Bacteria;p__Gemmatimonadota;c__Gemmatimonadetes;o__Gemmatimonadales;f__Gemmatimonadaceae;g__JABWBJ01;s__
8-5_bin.15	d__Bacteria;p__Verrucomicrobiota;c__Verrucomicrobiae;o__Chthoniobacterales;f__UBA10450;g__Palsa-1382;s__
8-5_bin.2	d__Bacteria;p__Proteobacteria;c__Alphaproteobacteria;o__Sphingomonadales;f__Sphingomonadaceae;g__Sphingomicrobium;s__
8-5_bin.3	d__Bacteria;p__Actinobacteriota;c__Thermoleophilia;o__Gaiellales;f__Gaiellaceae;g__3-1-20CM-4-69-9;s__
8-5_bin.4	d__Bacteria;p__Proteobacteria;c__Alphaproteobacteria;o__Rhizobiales;f__Xanthobacteraceae;g__Z2-YC6860;s__
8-5_bin.5	d__Bacteria;p__Acidobacteriota;c__Thermoanaerobaculia;o__UBA5066;f__Gp7-AA6;g__Gp7-AA6;s__
8-5_bin.6	d__Bacteria;p__Proteobacteria;c__Alphaproteobacteria;o__Micropepsales;f__Micropepsaceae;g__;s__
8-5_bin.7	d__Bacteria;p__Acidobacteriota;c__Acidobacteriae;o__Acidoferrales;f__UBA7541;g__Acidoferrum;s__
8-5_bin.8	d__Bacteria;p__Acidobacteriota;c__Blastocatellia;o__Pyrinomonadales;f__Pyrinomonadaceae;g__UBA11740;s__
1-1_bin.14	d__Archaea;p__Thermoplasmatota;c__E2;o__UBA9212;f__;g__;s__
1-8_bin.1	d__Archaea;p__Thermoplasmatota;c__SW-10-69-26;o__JACQPN01;f__;g__;s__
2-56_bin.15	d__Archaea;p__Thermoplasmatota;c__SW-10-69-26;o__JACQPN01;f__;g__;s__
2-66_bin.22	d__Archaea;p__Thermoproteota;c__Nitrososphaeria;o__Nitrososphaerales;f__Nitrosopumilaceae;g__Nitrosarchaeum;s__
6-2_bin.8	d__Archaea;p__Thermoproteota;c__Nitrososphaeria;o__Nitrososphaerales;f__Nitrosopumilaceae;g__TA-20;s__
6-4_bin.10	d__Archaea;p__Thermoproteota;c__Nitrososphaeria;o__Nitrososphaerales;f__Nitrosopumilaceae;g__TA-20;s__
7-1_bin.6	d__Archaea;p__Thermoproteota;c__Nitrososphaeria;o__Nitrososphaerales;f__Nitrosopumilaceae;g__Nitrosarchaeum;s__
7-6_bin.13	d__Archaea;p__Thermoproteota;c__Nitrososphaeria;o__Nitrososphaerales;f__Nitrosopumilaceae;g__TA-20;s__
8-3_bin.4	d__Archaea;p__Thermoplasmatota;c__Thermoplasmata;o__UBA184;f__UBA184;g__UBA184;s__
8-4_bin.11	d__Archaea;p__Thermoplasmatota;c__Thermoplasmata;o__;f__;g__;s__
8-4_bin.13	d__Archaea;p__Thermoplasmatota;c__Thermoplasmata;o__UBA184;f__UBA184;g__UBA184;s__

## Sheet: Table S3
species-level MAGs	taxonomy	orders	DsrA	DsrB	AprA	AprB	Sat	dsrE	dsrF	dsrH
1-1_bin.17	d__Bacteria;p__Proteobacteria;c__Gammaproteobacteria;o__JAHJQQ01;f__JAHJQQ01;g__JAHJQQ01;s__	o__JAHJQQ01	1-1_bin.17~1-1_NODE_824_length_15110_cov_8.989107_14	1-1_bin.17~1-1_NODE_824_length_15110_cov_8.989107_15	1-1_bin.17~1-1_NODE_1863_length_10264_cov_8.175629_2;1-1_bin.17~1-1_NODE_1863_length_10264_cov_8.175629_3	1-1_bin.17~1-1_NODE_1863_length_10264_cov_8.175629_4	NA	NA	1-1_bin.17~1-1_NODE_824_length_15110_cov_8.989107_13	1-1_bin.17~1-1_NODE_824_length_15110_cov_8.989107_12
1-1_bin.23	d__Bacteria;p__Proteobacteria;c__Gammaproteobacteria;o__SG8-11;f__SG8-11;g__UBA6921;s__	o__SG8-11	1-1_bin.23~1-1_NODE_973_length_13982_cov_9.564443_9;1-1_bin.23~1-1_NODE_20024_length_2946_cov_9.424767_1	1-1_bin.23~1-1_NODE_973_length_13982_cov_9.564443_9;1-1_bin.23~1-1_NODE_20024_length_2946_cov_9.424767_2	NA	NA	1-1_bin.23~1-1_NODE_1940_length_10042_cov_10.225393_1;1-1_bin.23~1-1_NODE_1940_length_10042_cov_10.225393_2;1-1_bin.23~1-1_NODE_7695_length_4912_cov_8.887173_2	1-1_bin.23~1-1_NODE_1940_length_10042_cov_10.225393_1;1-1_bin.23~1-1_NODE_1940_length_10042_cov_10.225393_2;1-1_bin.23~1-1_NODE_7695_length_4912_cov_8.887173_2	NA	NA
1-4_bin.19	d__Bacteria;p__Proteobacteria;c__Gammaproteobacteria;o__Acidiferrobacterales;f__UBA6901;g__UBA6901;s__	o__Acidiferrobacterales	1-4_bin.19~1-4_NODE_21143_length_3114_cov_9.189278_1	1-4_bin.19~1-4_NODE_21143_length_3114_cov_9.189278_2	1-4_bin.19~1-4_NODE_21528_length_3087_cov_4.595317_1	1-4_bin.19~1-4_NODE_21528_length_3087_cov_4.595317_2	1-4_bin.19~1-4_NODE_1188_length_13496_cov_10.128785_1;1-4_bin.19~1-4_NODE_7236_length_5313_cov_8.002092_4;NA	1-4_bin.19~1-4_NODE_1188_length_13496_cov_10.128785_1;1-4_bin.19~1-4_NODE_7236_length_5313_cov_8.002092_4;NA	NA	NA
1-4_bin.1	d__Bacteria;p__Proteobacteria;c__Gammaproteobacteria;o__Burkholderiales;f__Thiobacillaceae;g__;s__	o__Burkholderiales	1-4_bin.1~1-4_NODE_12289_length_4066_cov_16.547494_7	1-4_bin.1~1-4_NODE_12289_length_4066_cov_16.547494_8	1-4_bin.1~1-4_NODE_4955_length_6400_cov_16.388968_1	NA	NA	NA	1-4_bin.1~1-4_NODE_12289_length_4066_cov_16.547494_6	1-4_bin.1~1-4_NODE_12289_length_4066_cov_16.547494_5
2-4_bin.23	d__Bacteria;p__Proteobacteria;c__Gammaproteobacteria;o__Acidiferrobacterales;f__UBA6901;g__JACREH01;s__	o__Acidiferrobacterales	2-4_bin.23~2-4_NODE_17837_length_3204_cov_5.740235_3	2-4_bin.23~2-4_NODE_17837_length_3204_cov_5.740235_4	NA	NA	2-4_bin.23~2-4_NODE_18100_length_3179_cov_5.011524_6;NA;NA	2-4_bin.23~2-4_NODE_18100_length_3179_cov_5.011524_6;NA;NA	NA	NA
2-4_bin.26	d__Bacteria;p__Proteobacteria;c__Gammaproteobacteria;o__Burkholderiales;f__Sulfuricellaceae_A;g__;s__	o__Burkholderiales	2-4_bin.26~2-4_NODE_4913_length_6284_cov_5.629796_4	2-4_bin.26~2-4_NODE_4913_length_6284_cov_5.629796_5	2-4_bin.26~2-4_NODE_1313_length_12666_cov_6.297122_10;2-4_bin.26~2-4_NODE_17371_length_3251_cov_7.729662_1	NA	2-4_bin.26~2-4_NODE_1410_length_12254_cov_7.170834_1;2-4_bin.26~2-4_NODE_17371_length_3251_cov_7.729662_3;NA	2-4_bin.26~2-4_NODE_1410_length_12254_cov_7.170834_1;2-4_bin.26~2-4_NODE_17371_length_3251_cov_7.729662_3;NA	2-4_bin.26~2-4_NODE_4913_length_6284_cov_5.629796_3	2-4_bin.26~2-4_NODE_4913_length_6284_cov_5.629796_2
2-56_bin.13	d__Bacteria;p__Proteobacteria;c__Gammaproteobacteria;o__Acidiferrobacterales;f__Sulfurifustaceae;g__Sulfuricaulis;s__	o__Acidiferrobacterales	2-56_bin.13~2-56_NODE_51792_length_2078_cov_4.417202_1	2-56_bin.13~2-56_NODE_51792_length_2078_cov_4.417202_2	NA	NA	2-56_bin.13~2-56_NODE_5491_length_7011_cov_3.114434_6;2-56_bin.13~2-56_NODE_1483_length_13642_cov_4.079635_1;2-56_bin.13~2-56_NODE_31204_length_2716_cov_3.166855_1	2-56_bin.13~2-56_NODE_5491_length_7011_cov_3.114434_6;2-56_bin.13~2-56_NODE_1483_length_13642_cov_4.079635_1;2-56_bin.13~2-56_NODE_31204_length_2716_cov_3.166855_1	NA	NA
2-56_bin.32	d__Bacteria;p__Proteobacteria;c__Gammaproteobacteria;o__Burkholderiales;f__Sulfuricellaceae_A;g__;s__	o__Burkholderiales	2-56_bin.32~2-56_NODE_32058_length_2679_cov_3.211509_1;2-56_bin.32~2-56_NODE_51446_length_2085_cov_3.520690_3	2-56_bin.32~2-56_NODE_32058_length_2679_cov_3.211509_1;2-56_bin.32~2-56_NODE_51446_length_2085_cov_3.520690_4	2-56_bin.32~2-56_NODE_30217_length_2764_cov_4.444444_1;2-56_bin.32~2-56_NODE_32125_length_2675_cov_6.172901_4	NA	2-56_bin.32~2-56_NODE_17468_length_3737_cov_7.639870_1;2-56_bin.32~2-56_NODE_32125_length_2675_cov_6.172901_2;NA	2-56_bin.32~2-56_NODE_17468_length_3737_cov_7.639870_1;2-56_bin.32~2-56_NODE_32125_length_2675_cov_6.172901_2;NA	NA	NA
2-66_bin.13	d__Bacteria;p__Proteobacteria;c__Gammaproteobacteria;o__Burkholderiales;f__Burkholderiaceae;g__Rhodoferax;s__	o__Burkholderiales	2-66_bin.13~2-66_NODE_485_length_20206_cov_7.833904_8	2-66_bin.13~2-66_NODE_485_length_20206_cov_7.833904_9	2-66_bin.13~2-66_NODE_770_length_15384_cov_8.713615_9	2-66_bin.13~2-66_NODE_770_length_15384_cov_8.713615_10	2-66_bin.13~2-66_NODE_614_length_17482_cov_7.523326_2;2-66_bin.13~2-66_NODE_614_length_17482_cov_7.523326_3;2-66_bin.13~2-66_NODE_770_length_15384_cov_8.713615_11	2-66_bin.13~2-66_NODE_614_length_17482_cov_7.523326_2;2-66_bin.13~2-66_NODE_614_length_17482_cov_7.523326_3;2-66_bin.13~2-66_NODE_770_length_15384_cov_8.713615_11	2-66_bin.13~2-66_NODE_485_length_20206_cov_7.833904_7	2-66_bin.13~2-66_NODE_485_length_20206_cov_7.833904_6
2-66_bin.14	d__Bacteria;p__Proteobacteria;c__Gammaproteobacteria;o__Acidiferrobacterales;f__UBA6901;g__;s__	o__Acidiferrobacterales	2-66_bin.14~2-66_NODE_1182_length_12077_cov_7.934038_12	2-66_bin.14~2-66_NODE_1182_length_12077_cov_7.934038_13	NA	NA	2-66_bin.14~2-66_NODE_731_length_15753_cov_9.411263_19;NA;NA	2-66_bin.14~2-66_NODE_731_length_15753_cov_9.411263_19;NA;NA	2-66_bin.14~2-66_NODE_1182_length_12077_cov_7.934038_11	2-66_bin.14~2-66_NODE_1182_length_12077_cov_7.934038_10
2-66_bin.19	d__Bacteria;p__Proteobacteria;c__Gammaproteobacteria;o__CAIRSR01;f__CAIRSR01;g__;s__	o__CAIRSR01	2-66_bin.19~2-66_NODE_1389_length_11082_cov_7.586560_13;2-66_bin.19~2-66_NODE_2115_length_8834_cov_7.958537_1	2-66_bin.19~2-66_NODE_1389_length_11082_cov_7.586560_13;2-66_bin.19~2-66_NODE_2115_length_8834_cov_7.958537_2	2-66_bin.19~2-66_NODE_155_length_37239_cov_8.164506_4	2-66_bin.19~2-66_NODE_155_length_37239_cov_8.164506_3	2-66_bin.19~2-66_NODE_155_length_37239_cov_8.164506_2;NA;NA	2-66_bin.19~2-66_NODE_155_length_37239_cov_8.164506_2;NA;NA	2-66_bin.19~2-66_NODE_1389_length_11082_cov_7.586560_12	2-66_bin.19~2-66_NODE_1389_length_11082_cov_7.586560_11
2-66_bin.29	d__Bacteria;p__Proteobacteria;c__Gammaproteobacteria;o__Acidiferrobacterales;f__Sulfurifustaceae;g__Sulfuricaulis;s__	o__Acidiferrobacterales	2-66_bin.29~2-66_NODE_1897_length_9432_cov_8.897835_6	2-66_bin.29~2-66_NODE_1897_length_9432_cov_8.897835_7	NA	NA	2-66_bin.29~2-66_NODE_891_length_14298_cov_7.635962_1;2-66_bin.29~2-66_NODE_1946_length_9279_cov_8.876301_1;2-66_bin.29~2-66_NODE_26981_length_2464_cov_6.697385_1	2-66_bin.29~2-66_NODE_891_length_14298_cov_7.635962_1;2-66_bin.29~2-66_NODE_1946_length_9279_cov_8.876301_1;2-66_bin.29~2-66_NODE_26981_length_2464_cov_6.697385_1	2-66_bin.29~2-66_NODE_1897_length_9432_cov_8.897835_5	2-66_bin.29~2-66_NODE_1897_length_9432_cov_8.897835_4

## Sheet: Table S4
Genes	KO number	Threshold	Score	Evalue	Description	Symbol
1-1_bin.17~1-1_NODE_824_length_15110_cov_8.989107_2	K13628	138.6	76.4	1.5e-19	iron-sulfur cluster assembly protein	iscA/DsrR
1-1_bin.17~1-1_NODE_824_length_15110_cov_8.989107_3	K02224	181.1	555.6	1.2e-164	cobyrinic acid a,c-diamide synthase [EC:6.3.5.9 6.3.5.11]	cbiA/DsrN
1-1_bin.17~1-1_NODE_824_length_15110_cov_8.989107_4	K00185	315.73	162.3	1.3e-45	dimethyl sulfoxide reductase membrane subunit	dmsC
1-1_bin.17~1-1_NODE_824_length_15110_cov_8.989107_5	K08358	260.33	254.1	9.7e-74	tetrathionate reductase subunit B	ttrB
1-1_bin.17~1-1_NODE_824_length_15110_cov_8.989107_7	K15022	647.33	274.2	1.7e-79	formate dehydrogenase (NADP+) beta subunit [EC:1.17.1.10]	fdhB/DsrL
1-1_bin.17~1-1_NODE_824_length_15110_cov_8.989107_8	K18501	936.23	508.7	1.1e-150	heterodisulfide reductase iron-sulfur subunit	hmeD
1-1_bin.17~1-1_NODE_824_length_15110_cov_8.989107_9	K18500	410.63	170	5.9e-48	heterodisulfide reductase cytochrome b-like subunit	hmeC
1-1_bin.17~1-1_NODE_824_length_15110_cov_8.989107_10	K11179	132.67	164.8	1.4e-46	tRNA 2-thiouridine synthesizing protein E [EC:2.8.1.-]	dsrC
1-1_bin.17~1-1_NODE_824_length_15110_cov_8.989107_11	K07237	37.17	93.8	4.6e-25	tRNA 2-thiouridine synthesizing protein B	dsrH
1-1_bin.17~1-1_NODE_824_length_15110_cov_8.989107_12	K07236	59.73	161.2	1.3e-45	tRNA 2-thiouridine synthesizing protein C	dsrF
1-1_bin.17~1-1_NODE_824_length_15110_cov_8.989107_13	K07235	79.3	162.4	6.8e-46	tRNA 2-thiouridine synthesizing protein D [EC:2.8.1.-]	dsrE
1-1_bin.17~1-1_NODE_824_length_15110_cov_8.989107_14	K11181	378.2	551.9	3.3e-164	dissimilatory sulfite reductase beta subunit [EC:1.8.99.5]	dsrB
1-1_bin.17~1-1_NODE_824_length_15110_cov_8.989107_15	K11180	320.53	639.4	1.4e-190	dissimilatory sulfite reductase alpha subunit [EC:1.8.99.5]	dsrA
1-1_bin.17~1-1_NODE_824_length_15110_cov_8.989107_16	K00474	365.97	46.6	1.5e-10	trimethyllysine dioxygenase [EC:1.14.11.8]	TMLHE
1-1_bin.23~1-1_NODE_973_length_13982_cov_9.564443_1	K13811	440.5	73.6	7e-19	3'-phosphoadenosine 5'-phosphosulfate synthase [EC:2.7.7.4 2.7.1.25]
1-1_bin.23~1-1_NODE_973_length_13982_cov_9.564443_2	K01011	197.97	313.3	2.2e-91	thiosulfate/3-mercaptopyruvate sulfurtransferase [EC:2.8.1.1 2.8.1.2]
1-1_bin.23~1-1_NODE_973_length_13982_cov_9.564443_3	K11179	132.67	143.8	3.7e-40	tRNA 2-thiouridine synthesizing protein E [EC:2.8.1.-]
1-1_bin.23~1-1_NODE_973_length_13982_cov_9.564443_7	K00471	403.4	55.6	2.5e-13	gamma-butyrobetaine dioxygenase [EC:1.14.11.1]
1-1_bin.23~1-1_NODE_973_length_13982_cov_9.564443_8	K11180	320.53	653.8	5.9e-195	dissimilatory sulfite reductase alpha subunit [EC:1.8.99.5]	dsrA
1-1_bin.23~1-1_NODE_973_length_13982_cov_9.564443_9	K11181	378.2	550.8	7.2e-164	dissimilatory sulfite reductase beta subunit [EC:1.8.99.5]	dsrB
1-1_bin.23~1-1_NODE_973_length_13982_cov_9.564443_10	K07235	79.3	164.2	1.9e-46	tRNA 2-thiouridine synthesizing protein D [EC:2.8.1.-]	dsrE
1-1_bin.23~1-1_NODE_973_length_13982_cov_9.564443_11	K07236	59.73	158.3	9.8e-45	tRNA 2-thiouridine synthesizing protein C	dsrF
1-1_bin.23~1-1_NODE_973_length_13982_cov_9.564443_12	K07237	37.17	112.2	9.4e-31	tRNA 2-thiouridine synthesizing protein B	dsrH
1-1_bin.23~1-1_NODE_973_length_13982_cov_9.564443_13	K11179	132.67	167.4	2.2e-47	tRNA 2-thiouridine synthesizing protein E [EC:2.8.1.-]	dsrC
1-1_bin.23~1-1_NODE_973_length_13982_cov_9.564443_14	K18500	410.63	145.4	1.8e-40	heterodisulfide reductase cytochrome b-like subunit	hmeC
1-1_bin.23~1-1_NODE_973_length_13982_cov_9.564443_15	K18501	936.23	374.7	4.4e-110	heterodisulfide reductase iron-sulfur subunit	hmeD
1-1_bin.23~1-1_NODE_973_length_13982_cov_9.564443_16	K15022	647.33	302.4	4.7e-88	formate dehydrogenase (NADP+) beta subunit [EC:1.17.1.10]	fdhB
1-1_bin.23~1-1_NODE_973_length_13982_cov_9.564443_17	K08358	260.33	239	4.1e-69	tetrathionate reductase subunit B	ttrB
1-4_bin.19~1-4_NODE_21143_length_3114_cov_9.189278_1	K11181	378.2	65.8	1.9e-16	dissimilatory sulfite reductase beta subunit [EC:1.8.99.5]	DsrB
1-4_bin.19~1-4_NODE_21143_length_3114_cov_9.189278_2	K11180	320.53	655.1	2.4e-195	dissimilatory sulfite reductase alpha subunit [EC:1.8.99.5]	DsrA
1-4_bin.19~1-4_NODE_21143_length_3114_cov_9.189278_3	K00471	403.4	50.6	7.8e-12	gamma-butyrobetaine dioxygenase [EC:1.14.11.1]
1-4_bin.1~1-4_NODE_15359_length_3645_cov_16.700557_1	K11180	320.53	577	1.2e-171	dissimilatory sulfite reductase alpha subunit [EC:1.8.99.5]	DsrA
1-4_bin.1~1-4_NODE_15359_length_3645_cov_16.700557_4	K23077	127.03	94.6	2.8e-25	dissimilatory sulfite reductase related protein
1-4_bin.1~1-4_NODE_15359_length_3645_cov_16.700557_5	K01011	197.97	269.3	5e-78	thiosulfate/3-mercaptopyruvate sulfurtransferase [EC:2.8.1.1 2.8.1.2]
2-4_bin.23~2-4_NODE_17837_length_3204_cov_5.740235_1	K00471	403.4	44.1	7.3e-10	gamma-butyrobetaine dioxygenase [EC:1.14.11.1]
2-4_bin.23~2-4_NODE_17837_length_3204_cov_5.740235_2	K11180	320.53	650.8	4.8e-194	dissimilatory sulfite reductase alpha subunit [EC:1.8.99.5]	DsrA
2-4_bin.23~2-4_NODE_17837_length_3204_cov_5.740235_3	K11181	378.2	133.4	5.1e-37	dissimilatory sulfite reductase beta subunit [EC:1.8.99.5]	DsrB
2-4_bin.26~2-4_NODE_4913_length_6284_cov_5.629796_1	K07237	37.17	108.4	1.3e-29	tRNA 2-thiouridine synthesizing protein B	DsrH
2-4_bin.26~2-4_NODE_4913_length_6284_cov_5.629796_2	K07236	59.73	157.7	1.5e-44	tRNA 2-thiouridine synthesizing protein C	DsrF
2-4_bin.26~2-4_NODE_4913_length_6284_cov_5.629796_3	K07235	79.3	155.3	1e-43	tRNA 2-thiouridine synthesizing protein D [EC:2.8.1.-]	DsrE
2-4_bin.26~2-4_NODE_4913_length_6284_cov_5.629796_4	K11181	378.2	559.7	1.4e-166	dissimilatory sulfite reductase beta subunit [EC:1.8.99.5]	DsrB
2-4_bin.26~2-4_NODE_4913_length_6284_cov_5.629796_5	K11180	320.53	626.1	1.4e-186	dissimilatory sulfite reductase alpha subunit [EC:1.8.99.5]	DsrA
2-4_bin.26~2-4_NODE_4913_length_6284_cov_5.629796_8	K11179	132.67	100.8	5.5e-27	tRNA 2-thiouridine synthesizing protein E [EC:2.8.1.-]
2-4_bin.26~2-4_NODE_4913_length_6284_cov_5.629796_9	K01011	197.97	290	2.6e-84	thiosulfate/3-mercaptopyruvate sulfurtransferase [EC:2.8.1.1 2.8.1.2]
2-56_bin.13~2-56_NODE_22128_length_3279_cov_3.416253_1	K11180	320.53	610.9	5.9e-182	dissimilatory sulfite reductase alpha subunit [EC:1.8.99.5]
2-56_bin.13~2-56_NODE_22128_length_3279_cov_3.416253_2	K00471	403.4	48	5.1e-11	gamma-butyrobetaine dioxygenase [EC:1.14.11.1]
2-56_bin.32~2-56_NODE_51446_length_2085_cov_3.520690_1	K07236	59.73	85.9	1.7e-22	tRNA 2-thiouridine synthesizing protein C
2-56_bin.32~2-56_NODE_51446_length_2085_cov_3.520690_2	K07235	79.3	154.3	2e-43	tRNA 2-thiouridine synthesizing protein D [EC:2.8.1.-]
2-56_bin.32~2-56_NODE_51446_length_2085_cov_3.520690_3	K11181	378.2	559.9	1.2e-166	dissimilatory sulfite reductase beta subunit [EC:1.8.99.5]
2-56_bin.32~2-56_NODE_51446_length_2085_cov_3.520690_4	K11180	320.53	78.1	3.6e-20	dissimilatory sulfite reductase alpha subunit [EC:1.8.99.5]
2-66_bin.13~2-66_NODE_485_length_20206_cov_7.833904_1	K15022	647.33	314.9	7.9e-92	formate dehydrogenase (NADP+) beta subunit [EC:1.17.1.10]
2-66_bin.13~2-66_NODE_485_length_20206_cov_7.833904_2	K18501	936.23	498.1	1.7e-147	heterodisulfide reductase iron-sulfur subunit
2-66_bin.13~2-66_NODE_485_length_20206_cov_7.833904_3	K18500	410.63	159	1.2e-44	heterodisulfide reductase cytochrome b-like subunit
2-66_bin.13~2-66_NODE_485_length_20206_cov_7.833904_4	K11179	132.67	169.6	4.4e-48	tRNA 2-thiouridine synthesizing protein E [EC:2.8.1.-]
2-66_bin.13~2-66_NODE_485_length_20206_cov_7.833904_5	K07237	37.17	106.1	7.1e-29	tRNA 2-thiouridine synthesizing protein B
2-66_bin.13~2-66_NODE_485_length_20206_cov_7.833904_6	K07236	59.73	150.3	2.9e-42	tRNA 2-thiouridine synthesizing protein C
2-66_bin.13~2-66_NODE_485_length_20206_cov_7.833904_7	K07235	79.3	151.9	1.1e-42	tRNA 2-thiouridine synthesizing protein D [EC:2.8.1.-]
2-66_bin.13~2-66_NODE_485_length_20206_cov_7.833904_8	K11181	378.2	567.9	4.4e-169	dissimilatory sulfite reductase beta subunit [EC:1.8.99.5]
2-66_bin.13~2-66_NODE_485_length_20206_cov_7.833904_9	K11180	320.53	630.8	5.7e-188	dissimilatory sulfite reductase alpha subunit [EC:1.8.99.5]
2-66_bin.13~2-66_NODE_485_length_20206_cov_7.833904_12	K11179	132.67	105.6	1.8e-28	tRNA 2-thiouridine synthesizing protein E [EC:2.8.1.-]
2-66_bin.13~2-66_NODE_485_length_20206_cov_7.833904_14	K00471	403.4	52.7	1.8e-12	gamma-butyrobetaine dioxygenase [EC:1.14.11.1]
2-66_bin.13~2-66_NODE_485_length_20206_cov_7.833904_15	K00523	369.87	411.9	3.1e-121	CDP-4-dehydro-6-deoxyglucose reductase, E3 [EC:1.17.1.1]
2-66_bin.13~2-66_NODE_485_length_20206_cov_7.833904_16	K01356	127.17	45.9	4.1e-10	repressor LexA [EC:3.4.21.88]
2-66_bin.13~2-66_NODE_485_length_20206_cov_7.833904_18	K07181	153.37	54.7	5.9e-13	c-di-GMP phosphodiesterase [EC:3.1.4.52]
2-66_bin.13~2-66_NODE_485_length_20206_cov_7.833904_19	K03821	182.13	66.7	9.5e-17	poly[(R)-3-hydroxyalkanoate] polymerase subunit PhaC [EC:2.3.1.304]
2-66_bin.13~2-66_NODE_485_length_20206_cov_7.833904_20	K24291	553.27	28.8	4.2e-05	[2-(trimethylamino)ethyl]phosphonate dioxygenase [EC:1.14.11.72]
2-66_bin.13~2-66_NODE_485_length_20206_cov_7.833904_22	K07092	72.57	79.3	1.5e-20	uncharacterized protein
2-66_bin.13~2-66_NODE_485_length_20206_cov_7.833904_23	K04085	37.03	99.7	1e-26	tRNA 2-thiouridine synthesizing protein A [EC:2.8.1.-]
2-66_bin.13~2-66_NODE_485_length_20206_cov_7.833904_24	K03342	525.7	282.2	7.8e-82	para-aminobenzoate synthetase / 4-amino-4-deoxychorismate lyase [EC:2.6.1.85 4.1.3.38]
2-66_bin.14~2-66_NODE_1182_length_12077_cov_7.934038_1	K02224	181.1	320.4	1.9e-93	cobyrinic acid a,c-diamide synthase [EC:6.3.5.9 6.3.5.11]
2-66_bin.14~2-66_NODE_1182_length_12077_cov_7.934038_2	K00185	315.73	161.5	2.2e-45	dimethyl sulfoxide reductase membrane subunit
2-66_bin.14~2-66_NODE_1182_length_12077_cov_7.934038_3	K08358	260.33	229.5	3.1e-66	tetrathionate reductase subunit B
2-66_bin.14~2-66_NODE_1182_length_12077_cov_7.934038_5	K00266	508.27	306.9	2.1e-89	glutamate synthase (NADPH) small chain [EC:1.4.1.13]	gltD
2-66_bin.14~2-66_NODE_1182_length_12077_cov_7.934038_6	K18501	936.23	487.8	2.2e-144	heterodisulfide reductase iron-sulfur subunit
2-66_bin.14~2-66_NODE_1182_length_12077_cov_7.934038_7	K18500	410.63	148	2.9e-41	heterodisulfide reductase cytochrome b-like subunit
2-66_bin.14~2-66_NODE_1182_length_12077_cov_7.934038_8	K11179	132.67	166.5	4.1e-47	tRNA 2-thiouridine synthesizing protein E [EC:2.8.1.-]
2-66_bin.14~2-66_NODE_1182_length_12077_cov_7.934038_9	K07237	37.17	107.8	2.1e-29	tRNA 2-thiouridine synthesizing protein B
2-66_bin.14~2-66_NODE_1182_length_12077_cov_7.934038_10	K07236	59.73	159.9	3.4e-45	tRNA 2-thiouridine synthesizing protein C
2-66_bin.14~2-66_NODE_1182_length_12077_cov_7.934038_11	K07235	79.3	165.5	7.4e-47	tRNA 2-thiouridine synthesizing protein D [EC:2.8.1.-]
2-66_bin.14~2-66_NODE_1182_length_12077_cov_7.934038_12	K11181	378.2	554.4	5.8e-165	dissimilatory sulfite reductase beta subunit [EC:1.8.99.5]
2-66_bin.14~2-66_NODE_1182_length_12077_cov_7.934038_13	K11180	320.53	568.3	5.1e-169	dissimilatory sulfite reductase alpha subunit [EC:1.8.99.5]
2-66_bin.19~2-66_NODE_2115_length_8834_cov_7.958537_1	K11181	378.2	268.2	5.4e-78	dissimilatory sulfite reductase beta subunit [EC:1.8.99.5]
2-66_bin.19~2-66_NODE_2115_length_8834_cov_7.958537_2	K11180	320.53	649.5	1.2e-193	dissimilatory sulfite reductase alpha subunit [EC:1.8.99.5]
2-66_bin.19~2-66_NODE_2115_length_8834_cov_7.958537_3	K00471	403.4	49	2.4e-11	gamma-butyrobetaine dioxygenase [EC:1.14.11.1]
2-66_bin.19~2-66_NODE_2115_length_8834_cov_7.958537_7	K11179	132.67	120.3	5.9e-33	tRNA 2-thiouridine synthesizing protein E [EC:2.8.1.-]
2-66_bin.19~2-66_NODE_2115_length_8834_cov_7.958537_10	K07686	278.07	64.5	6.9e-16	two-component system, NarL family, uhpT operon response regulator UhpA
2-66_bin.19~2-66_NODE_2115_length_8834_cov_7.958537_11	K07336	90	254.7	6.9e-74	PKHD-type hydroxylase [EC:1.14.11.-]
2-66_bin.29~2-66_NODE_1897_length_9432_cov_8.897835_1	K18500	410.63	76	2.3e-19	heterodisulfide reductase cytochrome b-like subunit
2-66_bin.29~2-66_NODE_1897_length_9432_cov_8.897835_2	K11179	132.67	162.9	5e-46	tRNA 2-thiouridine synthesizing protein E [EC:2.8.1.-]
2-66_bin.29~2-66_NODE_1897_length_9432_cov_8.897835_3	K07237	37.17	101.8	1.6e-27	tRNA 2-thiouridine synthesizing protein B
2-66_bin.29~2-66_NODE_1897_length_9432_cov_8.897835_4	K07236	59.73	160.9	1.6e-45	tRNA 2-thiouridine synthesizing protein C
2-66_bin.29~2-66_NODE_1897_length_9432_cov_8.897835_5	K07235	79.3	162.3	7.3e-46	tRNA 2-thiouridine synthesizing protein D [EC:2.8.1.-]
2-66_bin.29~2-66_NODE_1897_length_9432_cov_8.897835_6	K11181	378.2	553.7	9.1e-165	dissimilatory sulfite reductase beta subunit [EC:1.8.99.5]
2-66_bin.29~2-66_NODE_1897_length_9432_cov_8.897835_7	K11180	320.53	647.8	3.9e-193	dissimilatory sulfite reductase alpha subunit [EC:1.8.99.5]
2-66_bin.29~2-66_NODE_1897_length_9432_cov_8.897835_8	K00471	403.4	47.9	5.1e-11	gamma-butyrobetaine dioxygenase [EC:1.14.11.1]
2-66_bin.29~2-66_NODE_1897_length_9432_cov_8.897835_12	K11179	132.67	129.4	9.6e-36	tRNA 2-thiouridine synthesizing protein E [EC:2.8.1.-]
2-66_bin.29~2-66_NODE_1897_length_9432_cov_8.897835_13	K01011	197.97	300.2	2.1e-87	thiosulfate/3-mercaptopyruvate sulfurtransferase [EC:2.8.1.1 2.8.1.2]
3-5_bin.11~3-5_NODE_2276_length_6220_cov_4.283212_1	K00185	315.73	109	2e-29	dimethyl sulfoxide reductase membrane subunit
3-5_bin.11~3-5_NODE_2276_length_6220_cov_4.283212_2	K08358	260.33	229.5	3.1e-66	tetrathionate reductase subunit B
3-5_bin.11~3-5_NODE_2276_length_6220_cov_4.283212_4	K00266	508.27	306.9	2.1e-89	glutamate synthase (NADPH) small chain [EC:1.4.1.13]	gltD
3-5_bin.11~3-5_NODE_2276_length_6220_cov_4.283212_5	K18501	936.23	487.2	3.5e-144	heterodisulfide reductase iron-sulfur subunit
3-5_bin.11~3-5_NODE_2276_length_6220_cov_4.283212_6	K18500	410.63	112.7	1.5e-30	heterodisulfide reductase cytochrome b-like subunit
4-6_bin.1~4-6_NODE_3955_length_6220_cov_4.762530_1	K07237	37.17	108.2	1.6e-29	tRNA 2-thiouridine synthesizing protein B
4-6_bin.1~4-6_NODE_3955_length_6220_cov_4.762530_2	K11179	132.67	166.5	4.1e-47	tRNA 2-thiouridine synthesizing protein E [EC:2.8.1.-]
4-6_bin.1~4-6_NODE_3955_length_6220_cov_4.762530_3	K18500	410.63	148	2.9e-41	heterodisulfide reductase cytochrome b-like subunit
4-6_bin.1~4-6_NODE_3955_length_6220_cov_4.762530_4	K18501	936.23	467.9	2.6e-138	heterodisulfide reductase iron-sulfur subunit
4-6_bin.1~4-6_NODE_3955_length_6220_cov_4.762530_5	K00266	508.27	305.1	7e-89	glutamate synthase (NADPH) small chain [EC:1.4.1.13]

## Sheet: Table S5
Protein ID	MAGs	Site	evalue for rubisco_form_I	evalue for rubisco_form_II	evalue for rubisco_form_III	evalue for rubisco_form_II_III	evalue for rubisco_form_IV	order	dsrA
1-1_bin.15~1-1_NODE_3005_length_8033_cov_4.394209_3	1-1_bin.15	S1	8e-18	NA	5.7e-37	2.3e-13	2.1e-96	o__UBA1565	NA
1-1_bin.17~1-1_NODE_3751_length_7213_cov_8.644733_2	1-1_bin.17	S1	1.6e-262	4e-51	7.9e-124	1.3e-60	2.5e-62	o__JAHJQQ01	1-1_bin.17~1-1_NODE_824_length_15110_cov_8.989107_14
1-1_bin.23~1-1_NODE_7850_length_4855_cov_10.854375_3	1-1_bin.23	S1	4.9e-282	1.8e-50	1.2e-118	4.7e-63	3.2e-61	o__SG8-11	1-1_bin.23~1-1_NODE_973_length_13982_cov_9.564443_9;1-1_bin.23~1-1_NODE_20024_length_2946_cov_9.424767_1
1-1_bin.23~1-1_NODE_8579_length_4648_cov_11.214457_3	1-1_bin.23	S1	3.9e-107	1.6e-16	5.3e-47	3.9e-30	7.3e-21	o__SG8-11	1-1_bin.23~1-1_NODE_973_length_13982_cov_9.564443_9;1-1_bin.23~1-1_NODE_20024_length_2946_cov_9.424767_1
1-1_bin.25~1-1_NODE_400_length_21370_cov_6.072390_21	1-1_bin.25	S1	7.1e-265	9.1e-52	5.8e-124	1.3e-60	6.7e-63	o__Burkholderiales	NA
1-1_bin.5~1-1_NODE_2429_length_9026_cov_5.655445_1	1-1_bin.5	S1	2.2e-08	NA	2.2e-22	3.7e-12	1e-55	o__	NA
1-1_bin.5~1-1_NODE_6888_length_5202_cov_5.280163_8	1-1_bin.5	S1	5.3e-12	0.00028	3.4e-27	4.1e-09	4.5e-55	o__	NA
1-1_bin.9~1-1_NODE_147_length_35660_cov_21.010111_7	1-1_bin.9	S1	4e-283	1.4e-47	8e-118	2e-58	5.4e-63	o__Burkholderiales	NA
1-4_bin.10~1-4_NODE_2152_length_9933_cov_8.256631_2	1-4_bin.10	S1	9e-282	1.9e-50	2.6e-123	1.9e-63	7e-63	o__Burkholderiales	NA
1-4_bin.12~1-4_NODE_7579_length_5185_cov_6.032164_1	1-4_bin.12	S1	NA	NA	NA	NA	0.00031	o__Flavobacteriales	NA
1-4_bin.17~1-4_NODE_45_length_58261_cov_7.201543_14	1-4_bin.17	S1	1.4e-29	2.5e-21	1.3e-63	7.6e-34	2e-147	o__Gemmatimonadales	NA
1-4_bin.21~1-4_NODE_82554_length_1604_cov_13.528728_1	1-4_bin.21	S1	1.2e-148	1e-27	3.8e-69	8.6e-24	2.9e-35	o__Nevskiales	NA
1-4_bin.22~1-4_NODE_30267_length_2621_cov_17.433359_3	1-4_bin.22	S1	2.3e-273	5.4e-55	5.1e-121	1.6e-61	8.5e-60	o__Cyanobacteriales	NA
1-8_bin.19~1-8_NODE_120_length_73628_cov_51.291778_25	1-8_bin.19	S1	1.4e-283	5.1e-47	9.9e-120	1.4e-58	2.4e-64	o__Burkholderiales	NA
1-8_bin.21~1-8_NODE_3292_length_10563_cov_5.652265_2	1-8_bin.21	S1	2.2e-266	5.3e-52	2.1e-129	6.4e-62	3e-69	o__	NA
1-8_bin.23~1-8_NODE_3804_length_9672_cov_5.890922_7	1-8_bin.23	S1	3.1e-268	1.9e-47	3.3e-125	5.4e-62	2.3e-61	o__AC-67	NA
1-8_bin.26~1-8_NODE_118_length_74060_cov_16.194392_40	1-8_bin.26	S1	4.2e-12	5.8e-08	1e-32	7e-11	8.6e-55	o__Acidimicrobiales	NA
1-8_bin.32~1-8_NODE_3226_length_10698_cov_6.624824_5	1-8_bin.32	S1	2.2e-282	2.1e-47	2.9e-120	3e-59	7.7e-66	o__P2-11E	NA
1-8_bin.6~1-8_NODE_98_length_80637_cov_8.403912_32	1-8_bin.6	S1	3.3e-266	4.4e-51	1.4e-124	8.9e-62	2.8e-63	o__AC-67	NA
1-8_vamb_6729~1-8_NODE_1364_length_18516_cov_18.009100_8	1-8_vamb_6729	S1	2.5e-21	5.1e-13	1.5e-51	6.9e-29	2.3e-91	o__IMCC26256	NA
1-8_vamb_6729~1-8_NODE_184_length_60754_cov_18.418475_38	1-8_vamb_6729	S1	4.5e-275	9.4e-51	6e-124	2e-61	4.6e-63	o__IMCC26256	NA
2-4_bin.26~2-4_NODE_6249_length_5561_cov_7.040501_1	2-4_bin.26	S2	3.2e-06	NA	NA	NA	NA	o__Burkholderiales	2-4_bin.26~2-4_NODE_4913_length_6284_cov_5.629796_4
2-4_bin.4~2-4_NODE_11126_length_4119_cov_3.656250_3	2-4_bin.4	S2	6.2e-34	5.8e-23	1.6e-73	1.5e-42	2.5e-134	o__Chitinophagales	NA
2-56_bin.15~2-56_NODE_15685_length_3960_cov_3.780538_1	2-56_bin.15	S2	2.6e-70	1.6e-46	3.5e-113	5.8e-69	2.9e-71	o__JACQPN01	NA
2-56_bin.17~2-56_NODE_923_length_17251_cov_9.555536_2	2-56_bin.17	S2	2.9e-288	1.5e-47	8.5e-124	5.9e-61	1.4e-65	o__Burkholderiales	NA
2-56_bin.6~2-56_NODE_11855_length_4619_cov_4.021253_6	2-56_bin.6	S2	2.5e-30	4.2e-30	6.8e-71	2.7e-47	1.2e-136	o__Pedosphaerales	NA
2-66_bin.11~2-66_NODE_10583_length_3933_cov_6.017277_1	2-66_bin.11	S2	NA	NA	1.1e-07	NA	3.1e-24	o__UBA5704	NA
2-66_bin.13~2-66_NODE_707_length_16066_cov_7.255012_8	2-66_bin.13	S2	7e-263	4.4e-55	9.2e-127	1.9e-64	3.8e-63	o__Burkholderiales	2-66_bin.13~2-66_NODE_485_length_20206_cov_7.833904_8
2-66_bin.14~2-66_NODE_43534_length_1953_cov_7.616965_1	2-66_bin.14	S2	1.4e-51	NA	4.3e-15	NA	NA	o__Acidiferrobacterales	2-66_bin.14~2-66_NODE_1182_length_12077_cov_7.934038_12
2-66_bin.15~2-66_NODE_17744_length_3042_cov_3.960830_1	2-66_bin.15	S2	2.7e-06	2.7e-05	4.7e-22	1.1e-07	2.9e-24	o__Pedosphaerales	NA
2-66_bin.19~2-66_NODE_365_length_23838_cov_7.727873_21	2-66_bin.19	S2	1e-15	3.6e-05	5.2e-45	7e-14	9.5e-97	o__CAIRSR01	2-66_bin.19~2-66_NODE_1389_length_11082_cov_7.586560_13;2-66_bin.19~2-66_NODE_2115_length_8834_cov_7.958537_1
2-66_bin.19~2-66_NODE_828_length_14760_cov_8.606120_12	2-66_bin.19	S2	2.5e-42	NA	5.2e-10	NA	NA	o__CAIRSR01	2-66_bin.19~2-66_NODE_1389_length_11082_cov_7.586560_13;2-66_bin.19~2-66_NODE_2115_length_8834_cov_7.958537_1
2-66_bin.29~2-66_NODE_8061_length_4512_cov_10.141126_1	2-66_bin.29	S2	3.6e-184	1e-30	6.9e-77	3.1e-47	4e-39	o__Acidiferrobacterales	2-66_bin.29~2-66_NODE_1897_length_9432_cov_8.897835_6
3-26_bin.16~3-26_NODE_85_length_78778_cov_35.209227_57	3-26_bin.16	S3	3.5e-14	NA	5.7e-38	4.4e-13	2.4e-63	o__Xanthomonadales	NA
3-26_bin.9~3-26_NODE_9227_length_4243_cov_5.788921_2	3-26_bin.9	S3	1.8e-14	9.8e-07	7.1e-28	1.5e-13	8.1e-104	o__Burkholderiales	NA
3-4_bin.16~3-4_NODE_23829_length_2239_cov_2.828297_1	3-4_bin.16	S3	1.1e-17	7.6e-12	3.3e-37	5.5e-25	4.5e-68	o__Sphingobacteriales	NA
3-4_bin.16~3-4_NODE_4534_length_5192_cov_3.508663_1	3-4_bin.16	S3	1e-05	NA	2.9e-17	1.9e-05	8e-41	o__Sphingobacteriales	NA
3-5_bin.12~3-5_NODE_10786_length_2846_cov_3.717664_5	3-5_bin.12	S3	3.6e-21	4.2e-17	1.2e-42	1.1e-32	2.2e-81	o__Burkholderiales	NA
4-2_bin.14~4-2_NODE_30360_length_1939_cov_5.022824_3	4-2_bin.14	S4	9.4e-84	6.1e-09	2.6e-34	3.1e-17	3.4e-08	o__Limnocylindrales	NA
4-2_bin.1~4-2_NODE_6312_length_4299_cov_6.336946_5	4-2_bin.1	S4	NA	NA	NA	NA	1.1e-07	o__Burkholderiales	NA
4-2_bin.1~4-2_NODE_9074_length_3606_cov_4.371726_4	4-2_bin.1	S4	NA	NA	NA	NA	4.1e-09	o__Burkholderiales	NA
4-2_bin.5~4-2_NODE_73_length_41277_cov_7.246907_8	4-2_bin.5	S4	1.7e-14	NA	1e-26	1.3e-11	2e-104	o__Gemmatimonadales	NA
4-6_bin.18~4-6_NODE_31454_length_2050_cov_3.429574_3	4-6_bin.18	S4	NA	NA	NA	NA	3.7e-13	o__Anaerolineales	NA
4-7_bin.2~4-7_NODE_2974_length_4361_cov_5.150488_5	4-7_bin.2	S4	1.2e-289	4.2e-51	8.1e-125	2e-63	8.7e-65	o__Rhizobiales	NA
5-6_bin.11~5-6_NODE_8579_length_3960_cov_4.906786_3	5-6_bin.11	S5	1.4e-05	NA	1e-21	3.5e-09	1.6e-96	o__Burkholderiales	NA
5-6_bin.9~5-6_NODE_289_length_34186_cov_12.905365_11	5-6_bin.9	S5	3.4e-276	7e-50	5.8e-123	2.5e-63	1.8e-61	o__Steroidobacterales	NA
5-7_bin.14~5-7_NODE_206_length_53388_cov_11.412484_45	5-7_bin.14	S5	4.2e-275	2.3e-47	1.8e-121	8.9e-64	1.2e-59	o__Burkholderiales	NA
5-7_bin.16~5-7_NODE_1154_length_14480_cov_4.730329_10	5-7_bin.16	S5	1.7e-15	1.9e-06	8.8e-33	1.7e-14	3.2e-114	o__Burkholderiales	NA
5-7_bin.17~5-7_NODE_19274_length_2758_cov_3.699223_3	5-7_bin.17	S5	7.5e-35	1.9e-27	5e-69	2.3e-47	2.6e-138	o__Burkholderiales	NA
5-7_bin.26~5-7_NODE_5430_length_5754_cov_5.909809_2	5-7_bin.26	S5	4.8e-275	7.7e-50	1.1e-122	2.2e-63	8.3e-61	o__Steroidobacterales	NA
7-1_bin.12~7-1_NODE_118_length_64561_cov_11.368741_1	7-1_bin.12	S7	8.7e-48	NA	3.5e-13	NA	7.8e-06	o__Burkholderiales	NA
7-1_bin.12~7-1_NODE_119_length_64500_cov_10.724354_78	7-1_bin.12	S7	3.9e-228	3.8e-41	3.8e-107	4.6e-60	2.9e-51	o__Burkholderiales	NA
7-1_bin.2~7-1_NODE_1303_length_13587_cov_3.957582_4	7-1_bin.2	S7	4.8e-285	4.7e-51	1.6e-120	1.6e-60	6.1e-61	o__Fen-336	NA
7-1_bin.6~7-1_NODE_24710_length_2265_cov_2.870136_1	7-1_bin.6	S7	1.9e-43	2.2e-22	2.5e-83	8.6e-33	2.8e-38	o__Nitrososphaerales	NA
7-2_bin.11~7-2_NODE_9035_length_5489_cov_5.576371_4	7-2_bin.11	S7	3.7e-284	3.2e-51	6.4e-126	6.3e-63	1.2e-65	o__ATCC43930	NA
7-6_bin.12~7-6_NODE_18302_length_2305_cov_3.502667_2	7-6_bin.12	S7	3.4e-34	1.8e-27	5.5e-70	4.1e-48	5.8e-135	o__Burkholderiales	NA
7-6_bin.12~7-6_NODE_8636_length_3265_cov_2.897196_4	7-6_bin.12	S7	NA	NA	NA	NA	1.9e-20	o__Burkholderiales	NA
8-4_bin.19~8-4_NODE_14592_length_3971_cov_4.731103_3	8-4_bin.19	S8	2.5e-273	2.1e-53	1.8e-127	1.3e-67	1.6e-64	o__Burkholderiales	NA
8-4_bin.25~8-4_NODE_1563_length_13487_cov_34.872767_6	8-4_bin.25	S8	1.2e-14	1.7e-10	4.5e-41	4.4e-24	4.3e-51	o__Rokubacteriales	NA
8-5_bin.11~8-5_NODE_392_length_26580_cov_24.746089_3	8-5_bin.11	S8	1.7e-14	1.5e-06	3.3e-31	3.8e-15	7.4e-107	o__Gemmatimonadales	NA
8-5_bin.3~8-5_NODE_154_length_43708_cov_8.643094_46	8-5_bin.3	S8	9.9e-09	1.9e-05	6.5e-25	4.3e-09	3.2e-52	o__Gaiellales	NA

## Sheet: Table S6
Protein ID	evalue for asrC	evalue for dsrA	evalue for dsrB
4-2_bin.9~4-2_NODE_4705_length_4937_cov_5.053667_3	6.5e-18	3.5e-13	1.1e-18
5-6_bin.1~5-6_NODE_16237_length_2761_cov_5.365115_2	6.6e-17	3.4e-12	1.9e-17
5-7_bin.1~5-7_NODE_41518_length_1819_cov_21.641723_2	7.2e-18	6.2e-13	1.3e-18
6-3_bin.4~6-3_NODE_3920_length_5948_cov_5.867130_6	1.2e-17	9.6e-13	2e-18
7-1_bin.11~7-1_NODE_1503_length_12474_cov_6.252436_2	1.2e-17	9.6e-13	2e-18
7-2_bin.13~7-2_NODE_11911_length_4571_cov_7.770372_2	5.6e-16	6.5e-13	1.2e-18
8-4_bin.25~8-4_NODE_12493_length_4354_cov_35.540591_2	1.8e-21	3.4e-15	5.7e-23
8-4_bin.25~8-4_NODE_75_length_75105_cov_26.214191_16	0.00033	NA	NA

## Sheet: Table S7
MAGs	genes	KOs	e-value	description of KOs	classification
2-66_bin.22	2-66_bin.22~2-66_NODE_418_25	K10945	6.9e-56	methane/ammonia monooxygenase subunit B	d__Archaea;p__Thermoproteota;c__Nitrososphaeria;o__Nitrososphaerales;f__Nitrosopumilaceae;g__Nitrosarchaeum;s__
2-66_bin.22	2-66_bin.22~2-66_NODE_418_26	K10946	2.9e-51	methane/ammonia monooxygenase subunit C	d__Archaea;p__Thermoproteota;c__Nitrososphaeria;o__Nitrososphaerales;f__Nitrosopumilaceae;g__Nitrosarchaeum;s__
2-66_bin.22	2-66_bin.22~2-66_NODE_418_28	K10944	3.3e-53	methane/ammonia monooxygenase subunit A [EC:1.14.18.3 1.14.99.39]	d__Archaea;p__Thermoproteota;c__Nitrososphaeria;o__Nitrososphaerales;f__Nitrosopumilaceae;g__Nitrosarchaeum;s__
2-66_bin.9	2-66_bin.9~2-66_NODE_5588_5	K10946	3.4e-104	methane/ammonia monooxygenase subunit C	d__Bacteria;p__Nitrospirota;c__Nitrospiria;o__Nitrospirales;f__Nitrospiraceae;g__Palsa-1315;s__
2-66_bin.9	2-66_bin.9~2-66_NODE_13738_2	K10946	1.2e-70	methane/ammonia monooxygenase subunit C	d__Bacteria;p__Nitrospirota;c__Nitrospiria;o__Nitrospirales;f__Nitrospiraceae;g__Palsa-1315;s__
4-2_bin.12	4-2_bin.12~4-2_NODE_21903_3	K10946	9.5e-39	methane/ammonia monooxygenase subunit C	d__Bacteria;p__Acidobacteriota;c__Acidobacteriae;o__Acidobacteriales;f__Acidobacteriaceae;g__Terracidiphilus;s__
4-2_bin.7	4-2_bin.7~4-2_NODE_5892_3	K10946	1.1e-20	methane/ammonia monooxygenase subunit C	d__Bacteria;p__Nitrospirota;c__Nitrospiria;o__Nitrospirales;f__Nitrospiraceae;g__Palsa-1315;s__
4-2_bin.7	4-2_bin.7~4-2_NODE_20292_2	K10945	1.8e-144	methane/ammonia monooxygenase subunit B	d__Bacteria;p__Nitrospirota;c__Nitrospiria;o__Nitrospirales;f__Nitrospiraceae;g__Palsa-1315;s__
4-2_bin.7	4-2_bin.7~4-2_NODE_20292_3	K10944	2.8e-95	methane/ammonia monooxygenase subunit A [EC:1.14.18.3 1.14.99.39]	d__Bacteria;p__Nitrospirota;c__Nitrospiria;o__Nitrospirales;f__Nitrospiraceae;g__Palsa-1315;s__
4-6_bin.3	4-6_bin.3~4-6_NODE_6763_2	K10946	1.6e-104	methane/ammonia monooxygenase subunit C	d__Bacteria;p__Nitrospirota;c__Nitrospiria;o__Nitrospirales;f__Nitrospiraceae;g__Palsa-1315;s__
5-7_bin.15	5-7_bin.15~5-7_NODE_14317_2	K10946	3.3e-104	methane/ammonia monooxygenase subunit C	d__Bacteria;p__Nitrospirota;c__Nitrospiria;o__Nitrospirales;f__Nitrospiraceae;g__Palsa-1315;s__
6-2_bin.8	6-2_bin.8~6-2_NODE_14_40	K10945	1.3e-51	methane/ammonia monooxygenase subunit B	d__Archaea;p__Thermoproteota;c__Nitrososphaeria;o__Nitrososphaerales;f__Nitrosopumilaceae;g__TA-20;s__
6-2_bin.8	6-2_bin.8~6-2_NODE_14_41	K10946	4.7e-50	methane/ammonia monooxygenase subunit C	d__Archaea;p__Thermoproteota;c__Nitrososphaeria;o__Nitrososphaerales;f__Nitrosopumilaceae;g__TA-20;s__
6-2_bin.8	6-2_bin.8~6-2_NODE_14_43	K10944	7.9e-53	methane/ammonia monooxygenase subunit A [EC:1.14.18.3 1.14.99.39]	d__Archaea;p__Thermoproteota;c__Nitrososphaeria;o__Nitrososphaerales;f__Nitrosopumilaceae;g__TA-20;s__
6-2_bin.9	6-2_bin.9~6-2_NODE_2024_1	K10944	1e-66	methane/ammonia monooxygenase subunit A [EC:1.14.18.3 1.14.99.39]	d__Bacteria;p__Nitrospirota;c__Nitrospiria;o__Nitrospirales;f__Nitrospiraceae;g__Palsa-1315;s__
6-2_bin.9	6-2_bin.9~6-2_NODE_2024_2	K10945	8.9e-145	methane/ammonia monooxygenase subunit B	d__Bacteria;p__Nitrospirota;c__Nitrospiria;o__Nitrospirales;f__Nitrospiraceae;g__Palsa-1315;s__
6-4_bin.10	6-4_bin.10~6-4_NODE_530_3	K10945	1.2e-51	methane/ammonia monooxygenase subunit B	d__Archaea;p__Thermoproteota;c__Nitrososphaeria;o__Nitrososphaerales;f__Nitrosopumilaceae;g__TA-20;s__
6-4_bin.10	6-4_bin.10~6-4_NODE_530_4	K10946	9.9e-51	methane/ammonia monooxygenase subunit C	d__Archaea;p__Thermoproteota;c__Nitrososphaeria;o__Nitrososphaerales;f__Nitrosopumilaceae;g__TA-20;s__
6-4_bin.10	6-4_bin.10~6-4_NODE_530_6	K10944	7.9e-53	methane/ammonia monooxygenase subunit A [EC:1.14.18.3 1.14.99.39]	d__Archaea;p__Thermoproteota;c__Nitrososphaeria;o__Nitrososphaerales;f__Nitrosopumilaceae;g__TA-20;s__
7-1_bin.6	7-1_bin.6~7-1_NODE_16302_1	K10946	3.6e-52	methane/ammonia monooxygenase subunit C	d__Archaea;p__Thermoproteota;c__Nitrososphaeria;o__Nitrososphaerales;f__Nitrosopumilaceae;g__Nitrosarchaeum;s__
7-1_bin.6	7-1_bin.6~7-1_NODE_16302_3	K10944	1.4e-52	methane/ammonia monooxygenase subunit A [EC:1.14.18.3 1.14.99.39]	d__Archaea;p__Thermoproteota;c__Nitrososphaeria;o__Nitrososphaerales;f__Nitrosopumilaceae;g__Nitrosarchaeum;s__
7-2_bin.13	7-2_bin.13~7-2_NODE_8962_2	K10945	5.7e-147	methane/ammonia monooxygenase subunit B	d__Bacteria;p__Methylomirabilota;c__Methylomirabilia;o__Rokubacteriales;f__CSP1-6;g__;s__
7-2_bin.13	7-2_bin.13~7-2_NODE_8962_3	K10944	1.1e-94	methane/ammonia monooxygenase subunit A [EC:1.14.18.3 1.14.99.39]	d__Bacteria;p__Methylomirabilota;c__Methylomirabilia;o__Rokubacteriales;f__CSP1-6;g__;s__
7-2_bin.13	7-2_bin.13~7-2_NODE_8962_4	K10946	4.3e-95	methane/ammonia monooxygenase subunit C	d__Bacteria;p__Methylomirabilota;c__Methylomirabilia;o__Rokubacteriales;f__CSP1-6;g__;s__
	7-2_bin.13~7-2_NODE_4345_5	K07156	4.6e-29	copper resistance protein C	d__Bacteria;p__Methylomirabilota;c__Methylomirabilia;o__Rokubacteriales;f__CSP1-7;g__;s__
	7-2_bin.13~7-2_NODE_4345_6	K07245	7.6e-39	copper resistance protein D	d__Bacteria;p__Methylomirabilota;c__Methylomirabilia;o__Rokubacteriales;f__CSP1-8;g__;s__
7-6_bin.13	7-6_bin.13~7-6_NODE_2143_4	K10945	2.1e-51	methane/ammonia monooxygenase subunit B	d__Archaea;p__Thermoproteota;c__Nitrososphaeria;o__Nitrososphaerales;f__Nitrosopumilaceae;g__TA-20;s__
7-6_bin.13	7-6_bin.13~7-6_NODE_2143_5	K10946	1.9e-44	methane/ammonia monooxygenase subunit C	d__Archaea;p__Thermoproteota;c__Nitrososphaeria;o__Nitrososphaerales;f__Nitrosopumilaceae;g__TA-20;s__
7-6_bin.13	7-6_bin.13~7-6_NODE_2143_6	K10944	3.1e-50	methane/ammonia monooxygenase subunit A [EC:1.14.18.3 1.14.99.39]	d__Archaea;p__Thermoproteota;c__Nitrososphaeria;o__Nitrososphaerales;f__Nitrosopumilaceae;g__TA-20;s__
8-4_bin.17	8-4_bin.17~8-4_NODE_335_27	K10946	1.9e-104	methane/ammonia monooxygenase subunit C	d__Bacteria;p__Desulfobacterota_B;c__Binatia;o__JACPRU01;f__JACPRU01;g__;s__
8-4_bin.17	8-4_bin.17~8-4_NODE_335_28	K10944	2.9e-107	methane/ammonia monooxygenase subunit A [EC:1.14.18.3 1.14.99.39]	d__Bacteria;p__Desulfobacterota_B;c__Binatia;o__JACPRU01;f__JACPRU01;g__;s__
8-4_bin.17	8-4_bin.17~8-4_NODE_335_29	K10945	4e-152	methane/ammonia monooxygenase subunit B	d__Bacteria;p__Desulfobacterota_B;c__Binatia;o__JACPRU01;f__JACPRU01;g__;s__
8-4_bin.17	8-4_bin.17~8-4_NODE_504_18	K10946	2.1e-77	methane/ammonia monooxygenase subunit C	d__Bacteria;p__Desulfobacterota_B;c__Binatia;o__JACPRU01;f__JACPRU01;g__;s__
8-4_bin.17	8-4_bin.17~8-4_NODE_504_19	K10944	1.4e-79	methane/ammonia monooxygenase subunit A [EC:1.14.18.3 1.14.99.39]	d__Bacteria;p__Desulfobacterota_B;c__Binatia;o__JACPRU01;f__JACPRU01;g__;s__
8-4_bin.17	8-4_bin.17~8-4_NODE_504_20	K10945	7.2e-139	methane/ammonia monooxygenase subunit B	d__Bacteria;p__Desulfobacterota_B;c__Binatia;o__JACPRU01;f__JACPRU01;g__;s__
8-4_bin.17	8-4_bin.17~8-4_NODE_504_22	K07156	9.3e-36	copper resistance protein C	d__Bacteria;p__Desulfobacterota_B;c__Binatia;o__JACPRU01;f__JACPRU02;g__;s__
8-4_bin.17	8-4_bin.17~8-4_NODE_504_24	K07245	3e-30	copper resistance protein D	d__Bacteria;p__Desulfobacterota_B;c__Binatia;o__JACPRU01;f__JACPRU03;g__;s__
8-4_bin.17	8-4_bin.17~8-4_NODE_504_25	K10946	4.9e-46	methane/ammonia monooxygenase subunit C	d__Bacteria;p__Desulfobacterota_B;c__Binatia;o__JACPRU01;f__JACPRU01;g__;s__
8-4_bin.22	8-4_bin.22~8-4_NODE_11319_6	K10946	6.9e-53	methane/ammonia monooxygenase subunit C	d__Bacteria;p__Nitrospirota;c__Nitrospiria;o__Nitrospirales;f__Nitrospiraceae;g__Palsa-1315;s__
8-4_bin.3	8-4_bin.3~8-4_NODE_14676_2	K10945	1.5e-145	methane/ammonia monooxygenase subunit B	d__Bacteria;p__Desulfobacterota_B;c__Binatia;o__Bin18;f__Bin18;g__;s__
8-4_bin.3	8-4_bin.3~8-4_NODE_14676_3	K10944	2e-95	methane/ammonia monooxygenase subunit A [EC:1.14.18.3 1.14.99.39]	d__Bacteria;p__Desulfobacterota_B;c__Binatia;o__Bin18;f__Bin18;g__;s__

## Sheet: Table S8
viruses	host	host_taxonomy	tool	class	genus	order
8-3_NODE_149	1-1_bin.22	d__Bacteria;p__Bacteroidota;c__Bacteroidia;o__AKYH767;f__B-17BO;g__UBA4416;s__	CRISPR_spacer	c__Bacteroidia	g__UBA4416	o__AKYH767
6-3_NODE_693	1-1_bin.22	d__Bacteria;p__Bacteroidota;c__Bacteroidia;o__AKYH767;f__B-17BO;g__UBA4416;s__	CRISPR_spacer	c__Bacteroidia	g__UBA4416	o__AKYH767
4-7_NODE_1681	1-1_bin.22	d__Bacteria;p__Bacteroidota;c__Bacteroidia;o__AKYH767;f__B-17BO;g__UBA4416;s__	CRISPR_spacer	c__Bacteroidia	g__UBA4416	o__AKYH767
4-2_NODE_955	1-1_bin.22	d__Bacteria;p__Bacteroidota;c__Bacteroidia;o__AKYH767;f__B-17BO;g__UBA4416;s__	CRISPR_spacer	c__Bacteroidia	g__UBA4416	o__AKYH767
7-2_NODE_1188	1-1_bin.22	d__Bacteria;p__Bacteroidota;c__Bacteroidia;o__AKYH767;f__B-17BO;g__UBA4416;s__	CRISPR_spacer	c__Bacteroidia	g__UBA4416	o__AKYH767
7-1_NODE_48	1-1_bin.22	d__Bacteria;p__Bacteroidota;c__Bacteroidia;o__AKYH767;f__B-17BO;g__UBA4416;s__	CRISPR_spacer	c__Bacteroidia	g__UBA4416	o__AKYH767
3-26_NODE_23_1	1-1_bin.22	d__Bacteria;p__Bacteroidota;c__Bacteroidia;o__AKYH767;f__B-17BO;g__UBA4416;s__	CRISPR_spacer	c__Bacteroidia	g__UBA4416	o__AKYH767
2-56_NODE_29	1-1_bin.22	d__Bacteria;p__Bacteroidota;c__Bacteroidia;o__AKYH767;f__B-17BO;g__UBA4416;s__	CRISPR_spacer	c__Bacteroidia	g__UBA4416	o__AKYH767
2-4_NODE_41	1-1_bin.22	d__Bacteria;p__Bacteroidota;c__Bacteroidia;o__AKYH767;f__B-17BO;g__UBA4416;s__	CRISPR_spacer	c__Bacteroidia	g__UBA4416	o__AKYH767
8-4_NODE_13	1-1_bin.22	d__Bacteria;p__Bacteroidota;c__Bacteroidia;o__AKYH767;f__B-17BO;g__UBA4416;s__	CRISPR_spacer	c__Bacteroidia	g__UBA4416	o__AKYH767
4-6_NODE_1223	1-1_bin.22	d__Bacteria;p__Bacteroidota;c__Bacteroidia;o__AKYH767;f__B-17BO;g__UBA4416;s__	CRISPR_spacer	c__Bacteroidia	g__UBA4416	o__AKYH767
4-7_NODE_1340	1-1_bin.22	d__Bacteria;p__Bacteroidota;c__Bacteroidia;o__AKYH767;f__B-17BO;g__UBA4416;s__	CRISPR_spacer	c__Bacteroidia	g__UBA4416	o__AKYH767
4-2_NODE_1621	1-1_bin.22	d__Bacteria;p__Bacteroidota;c__Bacteroidia;o__AKYH767;f__B-17BO;g__UBA4416;s__	CRISPR_spacer	c__Bacteroidia	g__UBA4416	o__AKYH767
7-6_NODE_416	1-1_bin.22	d__Bacteria;p__Bacteroidota;c__Bacteroidia;o__AKYH767;f__B-17BO;g__UBA4416;s__	CRISPR_spacer	c__Bacteroidia	g__UBA4416	o__AKYH767
7-6_NODE_285	1-1_bin.22	d__Bacteria;p__Bacteroidota;c__Bacteroidia;o__AKYH767;f__B-17BO;g__UBA4416;s__	CRISPR_spacer	c__Bacteroidia	g__UBA4416	o__AKYH767
8-3_NODE_1523	1-1_bin.22	d__Bacteria;p__Bacteroidota;c__Bacteroidia;o__AKYH767;f__B-17BO;g__UBA4416;s__	CRISPR_spacer	c__Bacteroidia	g__UBA4416	o__AKYH767
6-3_NODE_65	1-1_bin.22	d__Bacteria;p__Bacteroidota;c__Bacteroidia;o__AKYH767;f__B-17BO;g__UBA4416;s__	CRISPR_spacer	c__Bacteroidia	g__UBA4416	o__AKYH767
7-1_NODE_55	1-1_bin.22	d__Bacteria;p__Bacteroidota;c__Bacteroidia;o__AKYH767;f__B-17BO;g__UBA4416;s__	CRISPR_spacer	c__Bacteroidia	g__UBA4416	o__AKYH767
4-6_NODE_1325	1-1_bin.22	d__Bacteria;p__Bacteroidota;c__Bacteroidia;o__AKYH767;f__B-17BO;g__UBA4416;s__	CRISPR_spacer	c__Bacteroidia	g__UBA4416	o__AKYH767
7-1_NODE_1159	1-1_bin.22	d__Bacteria;p__Bacteroidota;c__Bacteroidia;o__AKYH767;f__B-17BO;g__UBA4416;s__	CRISPR_spacer	c__Bacteroidia	g__UBA4416	o__AKYH767
3-4_NODE_1539	1-1_bin.22	d__Bacteria;p__Bacteroidota;c__Bacteroidia;o__AKYH767;f__B-17BO;g__UBA4416;s__	CRISPR_spacer	c__Bacteroidia	g__UBA4416	o__AKYH767
6-3_NODE_1377	1-1_bin.22	d__Bacteria;p__Bacteroidota;c__Bacteroidia;o__AKYH767;f__B-17BO;g__UBA4416;s__	CRISPR_spacer	c__Bacteroidia	g__UBA4416	o__AKYH767
7-6_NODE_8	1-1_bin.22	d__Bacteria;p__Bacteroidota;c__Bacteroidia;o__AKYH767;f__B-17BO;g__UBA4416;s__	CRISPR_spacer	c__Bacteroidia	g__UBA4416	o__AKYH767
8-4_NODE_18	1-1_bin.22	d__Bacteria;p__Bacteroidota;c__Bacteroidia;o__AKYH767;f__B-17BO;g__UBA4416;s__	CRISPR_spacer	c__Bacteroidia	g__UBA4416	o__AKYH767
7-2_NODE_1429	1-1_bin.22	d__Bacteria;p__Bacteroidota;c__Bacteroidia;o__AKYH767;f__B-17BO;g__UBA4416;s__	CRISPR_spacer	c__Bacteroidia	g__UBA4416	o__AKYH767
7-6_NODE_70_1	1-4_bin.22	d__Bacteria;p__Cyanobacteria;c__Cyanobacteriia;o__Cyanobacteriales;f__Microcoleaceae;g__Microcoleus;s__	CRISPR_spacer	c__Cyanobacteriia	g__Microcoleus	o__Cyanobacteriales
8-5_NODE_1402	1-4_bin.22	d__Bacteria;p__Cyanobacteria;c__Cyanobacteriia;o__Cyanobacteriales;f__Microcoleaceae;g__Microcoleus;s__	CRISPR_spacer	c__Cyanobacteriia	g__Microcoleus	o__Cyanobacteriales
4-2_NODE_1445	1-4_bin.22	d__Bacteria;p__Cyanobacteria;c__Cyanobacteriia;o__Cyanobacteriales;f__Microcoleaceae;g__Microcoleus;s__	CRISPR_spacer	c__Cyanobacteriia	g__Microcoleus	o__Cyanobacteriales
5-6_NODE_341_1	1-4_bin.22	d__Bacteria;p__Cyanobacteria;c__Cyanobacteriia;o__Cyanobacteriales;f__Microcoleaceae;g__Microcoleus;s__	CRISPR_spacer	c__Cyanobacteriia	g__Microcoleus	o__Cyanobacteriales
7-2_NODE_122	1-4_bin.3	d__Bacteria;p__Verrucomicrobiota;c__Verrucomicrobiae;o__Pedosphaerales;f__SXQI01;g__;s__	CRISPR_spacer	c__Verrucomicrobiae	g__	o__Pedosphaerales
8-4_NODE_1934	1-4_bin.3	d__Bacteria;p__Verrucomicrobiota;c__Verrucomicrobiae;o__Pedosphaerales;f__SXQI01;g__;s__	CRISPR_spacer	c__Verrucomicrobiae	g__	o__Pedosphaerales
7-6_NODE_5497	1-8_bin.18	d__Bacteria;p__Actinobacteriota;c__Acidimicrobiia;o__Acidimicrobiales;f__GCA-2861595;g__;s__	CRISPR_spacer	c__Acidimicrobiia	g__	o__Acidimicrobiales
5-6_NODE_730	1-8_bin.18	d__Bacteria;p__Actinobacteriota;c__Acidimicrobiia;o__Acidimicrobiales;f__GCA-2861595;g__;s__	CRISPR_spacer	c__Acidimicrobiia	g__	o__Acidimicrobiales
7-1_NODE_975	1-8_bin.18	d__Bacteria;p__Actinobacteriota;c__Acidimicrobiia;o__Acidimicrobiales;f__GCA-2861595;g__;s__	CRISPR_spacer	c__Acidimicrobiia	g__	o__Acidimicrobiales
3-4_NODE_458	1-8_bin.45	d__Bacteria;p__Actinobacteriota;c__UBA4738;o__AC-67;f__AC-67;g__;s__	CRISPR_spacer	c__UBA4738	g__	o__AC-67
7-2_NODE_5205	1-8_bin.45	d__Bacteria;p__Actinobacteriota;c__UBA4738;o__AC-67;f__AC-67;g__;s__	CRISPR_spacer	c__UBA4738	g__	o__AC-67
2-4_NODE_3308	1-8_bin.45	d__Bacteria;p__Actinobacteriota;c__UBA4738;o__AC-67;f__AC-67;g__;s__	CRISPR_spacer	c__UBA4738	g__	o__AC-67
4-6_NODE_867	1-8_bin.45	d__Bacteria;p__Actinobacteriota;c__UBA4738;o__AC-67;f__AC-67;g__;s__	CRISPR_spacer	c__UBA4738	g__	o__AC-67
8-3_NODE_870	1-8_bin.45	d__Bacteria;p__Actinobacteriota;c__UBA4738;o__AC-67;f__AC-67;g__;s__	CRISPR_spacer	c__UBA4738	g__	o__AC-67
7-1_NODE_862	1-8_bin.45	d__Bacteria;p__Actinobacteriota;c__UBA4738;o__AC-67;f__AC-67;g__;s__	CRISPR_spacer	c__UBA4738	g__	o__AC-67
5-7_NODE_786	1-8_bin.45	d__Bacteria;p__Actinobacteriota;c__UBA4738;o__AC-67;f__AC-67;g__;s__	CRISPR_spacer	c__UBA4738	g__	o__AC-67
8-3_NODE_422	1-8_bin.45	d__Bacteria;p__Actinobacteriota;c__UBA4738;o__AC-67;f__AC-67;g__;s__	CRISPR_spacer	c__UBA4738	g__	o__AC-67
4-6_NODE_289	1-8_bin.45	d__Bacteria;p__Actinobacteriota;c__UBA4738;o__AC-67;f__AC-67;g__;s__	CRISPR_spacer	c__UBA4738	g__	o__AC-67
8-5_NODE_260	1-8_bin.45	d__Bacteria;p__Actinobacteriota;c__UBA4738;o__AC-67;f__AC-67;g__;s__	CRISPR_spacer	c__UBA4738	g__	o__AC-67
7-6_NODE_544	1-8_bin.45	d__Bacteria;p__Actinobacteriota;c__UBA4738;o__AC-67;f__AC-67;g__;s__	CRISPR_spacer	c__UBA4738	g__	o__AC-67
3-26_NODE_1713	1-8_bin.45	d__Bacteria;p__Actinobacteriota;c__UBA4738;o__AC-67;f__AC-67;g__;s__	CRISPR_spacer	c__UBA4738	g__	o__AC-67
5-6_NODE_1425	1-8_bin.45	d__Bacteria;p__Actinobacteriota;c__UBA4738;o__AC-67;f__AC-67;g__;s__	CRISPR_spacer	c__UBA4738	g__	o__AC-67
4-2_NODE_732_1	1-8_bin.45	d__Bacteria;p__Actinobacteriota;c__UBA4738;o__AC-67;f__AC-67;g__;s__	CRISPR_spacer	c__UBA4738	g__	o__AC-67
4-2_NODE_5018	1-8_bin.45	d__Bacteria;p__Actinobacteriota;c__UBA4738;o__AC-67;f__AC-67;g__;s__	CRISPR_spacer	c__UBA4738	g__	o__AC-67
2-56_NODE_408	1-8_bin.45	d__Bacteria;p__Actinobacteriota;c__UBA4738;o__AC-67;f__AC-67;g__;s__	CRISPR_spacer	c__UBA4738	g__	o__AC-67
5-5_NODE_978	1-8_bin.45	d__Bacteria;p__Actinobacteriota;c__UBA4738;o__AC-67;f__AC-67;g__;s__	CRISPR_spacer	c__UBA4738	g__	o__AC-67
3-4_NODE_786	1-8_bin.45	d__Bacteria;p__Actinobacteriota;c__UBA4738;o__AC-67;f__AC-67;g__;s__	CRISPR_spacer	c__UBA4738	g__	o__AC-67
6-3_NODE_1168	1-8_bin.45	d__Bacteria;p__Actinobacteriota;c__UBA4738;o__AC-67;f__AC-67;g__;s__	CRISPR_spacer	c__UBA4738	g__	o__AC-67
4-7_NODE_152	1-8_bin.45	d__Bacteria;p__Actinobacteriota;c__UBA4738;o__AC-67;f__AC-67;g__;s__	CRISPR_spacer	c__UBA4738	g__	o__AC-67
8-3_NODE_226	1-8_bin.45	d__Bacteria;p__Actinobacteriota;c__UBA4738;o__AC-67;f__AC-67;g__;s__	CRISPR_spacer	c__UBA4738	g__	o__AC-67
6-3_NODE_2816	1-8_bin.45	d__Bacteria;p__Actinobacteriota;c__UBA4738;o__AC-67;f__AC-67;g__;s__	CRISPR_spacer	c__UBA4738	g__	o__AC-67
7-6_NODE_641	1-8_bin.45	d__Bacteria;p__Actinobacteriota;c__UBA4738;o__AC-67;f__AC-67;g__;s__	CRISPR_spacer	c__UBA4738	g__	o__AC-67
8-3_NODE_2280	1-8_bin.45	d__Bacteria;p__Actinobacteriota;c__UBA4738;o__AC-67;f__AC-67;g__;s__	CRISPR_spacer	c__UBA4738	g__	o__AC-67
6-2_NODE_902	1-8_bin.45	d__Bacteria;p__Actinobacteriota;c__UBA4738;o__AC-67;f__AC-67;g__;s__	CRISPR_spacer	c__UBA4738	g__	o__AC-67
4-6_NODE_80	2-4_bin.19	d__Bacteria;p__Planctomycetota;c__Planctomycetia;o__Pirellulales;f__Pirellulaceae;g__;s__	CRISPR_spacer	c__Planctomycetia	g__	o__Pirellulales
5-6_NODE_507	2-4_bin.19	d__Bacteria;p__Planctomycetota;c__Planctomycetia;o__Pirellulales;f__Pirellulaceae;g__;s__	CRISPR_spacer	c__Planctomycetia	g__	o__Pirellulales
2-66_NODE_59	2-4_bin.19	d__Bacteria;p__Planctomycetota;c__Planctomycetia;o__Pirellulales;f__Pirellulaceae;g__;s__	CRISPR_spacer	c__Planctomycetia	g__	o__Pirellulales
1-4_NODE_62	2-4_bin.19	d__Bacteria;p__Planctomycetota;c__Planctomycetia;o__Pirellulales;f__Pirellulaceae;g__;s__	CRISPR_spacer	c__Planctomycetia	g__	o__Pirellulales
6-4_NODE_166	2-4_bin.19	d__Bacteria;p__Planctomycetota;c__Planctomycetia;o__Pirellulales;f__Pirellulaceae;g__;s__	CRISPR_spacer	c__Planctomycetia	g__	o__Pirellulales
2-4_NODE_2477	2-56_bin.21	d__Bacteria;p__Proteobacteria;c__Gammaproteobacteria;o__Burkholderiales;f__Burkholderiaceae;g__Ramlibacter;s__	CRISPR_spacer	c__Gammaproteobacteria	g__Ramlibacter	o__Burkholderiales
4-7_NODE_1647	2-56_bin.21	d__Bacteria;p__Proteobacteria;c__Gammaproteobacteria;o__Burkholderiales;f__Burkholderiaceae;g__Ramlibacter;s__	CRISPR_spacer	c__Gammaproteobacteria	g__Ramlibacter	o__Burkholderiales
8-3_NODE_3411	2-56_bin.21	d__Bacteria;p__Proteobacteria;c__Gammaproteobacteria;o__Burkholderiales;f__Burkholderiaceae;g__Ramlibacter;s__	CRISPR_spacer	c__Gammaproteobacteria	g__Ramlibacter	o__Burkholderiales
3-26_NODE_593	2-56_bin.21	d__Bacteria;p__Proteobacteria;c__Gammaproteobacteria;o__Burkholderiales;f__Burkholderiaceae;g__Ramlibacter;s__	CRISPR_spacer	c__Gammaproteobacteria	g__Ramlibacter	o__Burkholderiales
1-4_NODE_186	2-56_bin.21	d__Bacteria;p__Proteobacteria;c__Gammaproteobacteria;o__Burkholderiales;f__Burkholderiaceae;g__Ramlibacter;s__	CRISPR_spacer	c__Gammaproteobacteria	g__Ramlibacter	o__Burkholderiales
2-56_NODE_101	2-56_bin.21	d__Bacteria;p__Proteobacteria;c__Gammaproteobacteria;o__Burkholderiales;f__Burkholderiaceae;g__Ramlibacter;s__	CRISPR_spacer	c__Gammaproteobacteria	g__Ramlibacter	o__Burkholderiales
5-5_NODE_1138	2-56_bin.21	d__Bacteria;p__Proteobacteria;c__Gammaproteobacteria;o__Burkholderiales;f__Burkholderiaceae;g__Ramlibacter;s__	CRISPR_spacer	c__Gammaproteobacteria	g__Ramlibacter	o__Burkholderiales
4-2_NODE_513	2-56_bin.21	d__Bacteria;p__Proteobacteria;c__Gammaproteobacteria;o__Burkholderiales;f__Burkholderiaceae;g__Ramlibacter;s__	CRISPR_spacer	c__Gammaproteobacteria	g__Ramlibacter	o__Burkholderiales
3-26_NODE_665	2-56_bin.21	d__Bacteria;p__Proteobacteria;c__Gammaproteobacteria;o__Burkholderiales;f__Burkholderiaceae;g__Ramlibacter;s__	CRISPR_spacer	c__Gammaproteobacteria	g__Ramlibacter	o__Burkholderiales
8-3_NODE_2690	2-56_bin.21	d__Bacteria;p__Proteobacteria;c__Gammaproteobacteria;o__Burkholderiales;f__Burkholderiaceae;g__Ramlibacter;s__	CRISPR_spacer	c__Gammaproteobacteria	g__Ramlibacter	o__Burkholderiales
7-6_NODE_805	2-56_bin.21	d__Bacteria;p__Proteobacteria;c__Gammaproteobacteria;o__Burkholderiales;f__Burkholderiaceae;g__Ramlibacter;s__	CRISPR_spacer	c__Gammaproteobacteria	g__Ramlibacter	o__Burkholderiales
7-6_NODE_782	2-56_bin.21	d__Bacteria;p__Proteobacteria;c__Gammaproteobacteria;o__Burkholderiales;f__Burkholderiaceae;g__Ramlibacter;s__	CRISPR_spacer	c__Gammaproteobacteria	g__Ramlibacter	o__Burkholderiales
4-2_NODE_153	2-56_bin.21	d__Bacteria;p__Proteobacteria;c__Gammaproteobacteria;o__Burkholderiales;f__Burkholderiaceae;g__Ramlibacter;s__	CRISPR_spacer	c__Gammaproteobacteria	g__Ramlibacter	o__Burkholderiales
7-6_NODE_2264	2-56_bin.21	d__Bacteria;p__Proteobacteria;c__Gammaproteobacteria;o__Burkholderiales;f__Burkholderiaceae;g__Ramlibacter;s__	CRISPR_spacer	c__Gammaproteobacteria	g__Ramlibacter	o__Burkholderiales
7-1_NODE_27985_1	2-56_bin.21	d__Bacteria;p__Proteobacteria;c__Gammaproteobacteria;o__Burkholderiales;f__Burkholderiaceae;g__Ramlibacter;s__	CRISPR_spacer	c__Gammaproteobacteria	g__Ramlibacter	o__Burkholderiales
4-2_NODE_1205	2-56_bin.21	d__Bacteria;p__Proteobacteria;c__Gammaproteobacteria;o__Burkholderiales;f__Burkholderiaceae;g__Ramlibacter;s__	CRISPR_spacer	c__Gammaproteobacteria	g__Ramlibacter	o__Burkholderiales
7-2_NODE_971	2-56_bin.25	d__Bacteria;p__Proteobacteria;c__Gammaproteobacteria;o__Steroidobacterales;f__Steroidobacteraceae;g__RPQJ01;s__	CRISPR_spacer	c__Gammaproteobacteria	g__RPQJ01	o__Steroidobacterales
7-6_NODE_440	2-56_bin.25	d__Bacteria;p__Proteobacteria;c__Gammaproteobacteria;o__Steroidobacterales;f__Steroidobacteraceae;g__RPQJ01;s__	CRISPR_spacer	c__Gammaproteobacteria	g__RPQJ01	o__Steroidobacterales
4-6_NODE_96	2-56_bin.25	d__Bacteria;p__Proteobacteria;c__Gammaproteobacteria;o__Steroidobacterales;f__Steroidobacteraceae;g__RPQJ01;s__	CRISPR_spacer	c__Gammaproteobacteria	g__RPQJ01	o__Steroidobacterales
7-2_NODE_1125	2-56_bin.8	d__Bacteria;p__Desulfobacterota;c__Desulfuromonadia;o__Geobacterales;f__Pseudopelobacteraceae;g__JACRCG01;s__	CRISPR_spacer	c__Desulfuromonadia	g__JACRCG01	o__Geobacterales
4-7_NODE_240	2-56_bin.8	d__Bacteria;p__Desulfobacterota;c__Desulfuromonadia;o__Geobacterales;f__Pseudopelobacteraceae;g__JACRCG01;s__	CRISPR_spacer	c__Desulfuromonadia	g__JACRCG01	o__Geobacterales
2-4_NODE_40	2-56_bin.8	d__Bacteria;p__Desulfobacterota;c__Desulfuromonadia;o__Geobacterales;f__Pseudopelobacteraceae;g__JACRCG01;s__	CRISPR_spacer	c__Desulfuromonadia	g__JACRCG01	o__Geobacterales
3-4_NODE_361	2-56_bin.8	d__Bacteria;p__Desulfobacterota;c__Desulfuromonadia;o__Geobacterales;f__Pseudopelobacteraceae;g__JACRCG01;s__	CRISPR_spacer	c__Desulfuromonadia	g__JACRCG01	o__Geobacterales
7-2_NODE_643	2-56_bin.8	d__Bacteria;p__Desulfobacterota;c__Desulfuromonadia;o__Geobacterales;f__Pseudopelobacteraceae;g__JACRCG01;s__	CRISPR_spacer	c__Desulfuromonadia	g__JACRCG01	o__Geobacterales
7-6_NODE_765_1	2-56_bin.8	d__Bacteria;p__Desulfobacterota;c__Desulfuromonadia;o__Geobacterales;f__Pseudopelobacteraceae;g__JACRCG01;s__	CRISPR_spacer	c__Desulfuromonadia	g__JACRCG01	o__Geobacterales
5-7_NODE_5008	2-56_bin.8	d__Bacteria;p__Desulfobacterota;c__Desulfuromonadia;o__Geobacterales;f__Pseudopelobacteraceae;g__JACRCG01;s__	CRISPR_spacer	c__Desulfuromonadia	g__JACRCG01	o__Geobacterales
4-7_NODE_136	2-56_bin.8	d__Bacteria;p__Desulfobacterota;c__Desulfuromonadia;o__Geobacterales;f__Pseudopelobacteraceae;g__JACRCG01;s__	CRISPR_spacer	c__Desulfuromonadia	g__JACRCG01	o__Geobacterales
8-3_NODE_2	2-56_bin.8	d__Bacteria;p__Desulfobacterota;c__Desulfuromonadia;o__Geobacterales;f__Pseudopelobacteraceae;g__JACRCG01;s__	CRISPR_spacer	c__Desulfuromonadia	g__JACRCG01	o__Geobacterales
3-4_NODE_727	2-56_bin.8	d__Bacteria;p__Desulfobacterota;c__Desulfuromonadia;o__Geobacterales;f__Pseudopelobacteraceae;g__JACRCG01;s__	CRISPR_spacer	c__Desulfuromonadia	g__JACRCG01	o__Geobacterales
6-2_NODE_4587	2-56_bin.8	d__Bacteria;p__Desulfobacterota;c__Desulfuromonadia;o__Geobacterales;f__Pseudopelobacteraceae;g__JACRCG01;s__	CRISPR_spacer	c__Desulfuromonadia	g__JACRCG01	o__Geobacterales
5-6_NODE_1377	2-56_bin.8	d__Bacteria;p__Desulfobacterota;c__Desulfuromonadia;o__Geobacterales;f__Pseudopelobacteraceae;g__JACRCG01;s__	CRISPR_spacer	c__Desulfuromonadia	g__JACRCG01	o__Geobacterales
5-7_NODE_1152	2-56_bin.8	d__Bacteria;p__Desulfobacterota;c__Desulfuromonadia;o__Geobacterales;f__Pseudopelobacteraceae;g__JACRCG01;s__	CRISPR_spacer	c__Desulfuromonadia	g__JACRCG01	o__Geobacterales
6-4_NODE_469	2-56_bin.8	d__Bacteria;p__Desulfobacterota;c__Desulfuromonadia;o__Geobacterales;f__Pseudopelobacteraceae;g__JACRCG01;s__	CRISPR_spacer	c__Desulfuromonadia	g__JACRCG01	o__Geobacterales
4-2_NODE_3958	2-56_bin.8	d__Bacteria;p__Desulfobacterota;c__Desulfuromonadia;o__Geobacterales;f__Pseudopelobacteraceae;g__JACRCG01;s__	CRISPR_spacer	c__Desulfuromonadia	g__JACRCG01	o__Geobacterales
4-7_NODE_197	2-56_bin.8	d__Bacteria;p__Desulfobacterota;c__Desulfuromonadia;o__Geobacterales;f__Pseudopelobacteraceae;g__JACRCG01;s__	CRISPR_spacer	c__Desulfuromonadia	g__JACRCG01	o__Geobacterales
5-5_NODE_3437	2-56_bin.8	d__Bacteria;p__Desulfobacterota;c__Desulfuromonadia;o__Geobacterales;f__Pseudopelobacteraceae;g__JACRCG01;s__	CRISPR_spacer	c__Desulfuromonadia	g__JACRCG01	o__Geobacterales
5-7_NODE_1195	2-56_bin.8	d__Bacteria;p__Desulfobacterota;c__Desulfuromonadia;o__Geobacterales;f__Pseudopelobacteraceae;g__JACRCG01;s__	CRISPR_spacer	c__Desulfuromonadia	g__JACRCG01	o__Geobacterales
3-5_NODE_405	2-66_bin.13	d__Bacteria;p__Proteobacteria;c__Gammaproteobacteria;o__Burkholderiales;f__Burkholderiaceae;g__Rhodoferax;s__	CRISPR_spacer	c__Gammaproteobacteria	g__Rhodoferax	o__Burkholderiales
8-5_NODE_1775	2-66_bin.13	d__Bacteria;p__Proteobacteria;c__Gammaproteobacteria;o__Burkholderiales;f__Burkholderiaceae;g__Rhodoferax;s__	CRISPR_spacer	c__Gammaproteobacteria	g__Rhodoferax	o__Burkholderiales
7-2_NODE_3322	2-66_bin.13	d__Bacteria;p__Proteobacteria;c__Gammaproteobacteria;o__Burkholderiales;f__Burkholderiaceae;g__Rhodoferax;s__	CRISPR_spacer	c__Gammaproteobacteria	g__Rhodoferax	o__Burkholderiales
5-7_NODE_3410	2-66_bin.19	d__Bacteria;p__Proteobacteria;c__Gammaproteobacteria;o__CAIRSR01;f__CAIRSR01;g__;s__	CRISPR_spacer	c__Gammaproteobacteria	g__	o__CAIRSR01
4-2_NODE_4850	2-66_bin.19	d__Bacteria;p__Proteobacteria;c__Gammaproteobacteria;o__CAIRSR01;f__CAIRSR01;g__;s__	CRISPR_spacer	c__Gammaproteobacteria	g__	o__CAIRSR01
4-7_NODE_2101_1	3-26_bin.10	d__Bacteria;p__Proteobacteria;c__Alphaproteobacteria;o__Sphingomonadales;f__Sphingomonadaceae;g__Sphingobium;s__	CRISPR_spacer	c__Alphaproteobacteria	g__Sphingobium	o__Sphingomonadales
3-26_NODE_656	3-26_bin.10	d__Bacteria;p__Proteobacteria;c__Alphaproteobacteria;o__Sphingomonadales;f__Sphingomonadaceae;g__Sphingobium;s__	CRISPR_spacer	c__Alphaproteobacteria	g__Sphingobium	o__Sphingomonadales
1-1_NODE_562	3-26_bin.10	d__Bacteria;p__Proteobacteria;c__Alphaproteobacteria;o__Sphingomonadales;f__Sphingomonadaceae;g__Sphingobium;s__	CRISPR_spacer	c__Alphaproteobacteria	g__Sphingobium	o__Sphingomonadales
2-66_NODE_393	3-26_bin.10	d__Bacteria;p__Proteobacteria;c__Alphaproteobacteria;o__Sphingomonadales;f__Sphingomonadaceae;g__Sphingobium;s__	CRISPR_spacer	c__Alphaproteobacteria	g__Sphingobium	o__Sphingomonadales
1-8_NODE_595	3-26_bin.10	d__Bacteria;p__Proteobacteria;c__Alphaproteobacteria;o__Sphingomonadales;f__Sphingomonadaceae;g__Sphingobium;s__	CRISPR_spacer	c__Alphaproteobacteria	g__Sphingobium	o__Sphingomonadales
2-56_NODE_593	3-26_bin.10	d__Bacteria;p__Proteobacteria;c__Alphaproteobacteria;o__Sphingomonadales;f__Sphingomonadaceae;g__Sphingobium;s__	CRISPR_spacer	c__Alphaproteobacteria	g__Sphingobium	o__Sphingomonadales
7-1_NODE_1423	3-26_bin.10	d__Bacteria;p__Proteobacteria;c__Alphaproteobacteria;o__Sphingomonadales;f__Sphingomonadaceae;g__Sphingobium;s__	CRISPR_spacer	c__Alphaproteobacteria	g__Sphingobium	o__Sphingomonadales
5-7_NODE_5343	3-26_bin.10	d__Bacteria;p__Proteobacteria;c__Alphaproteobacteria;o__Sphingomonadales;f__Sphingomonadaceae;g__Sphingobium;s__	CRISPR_spacer	c__Alphaproteobacteria	g__Sphingobium	o__Sphingomonadales
8-5_NODE_243	3-26_bin.10	d__Bacteria;p__Proteobacteria;c__Alphaproteobacteria;o__Sphingomonadales;f__Sphingomonadaceae;g__Sphingobium;s__	CRISPR_spacer	c__Alphaproteobacteria	g__Sphingobium	o__Sphingomonadales
7-6_NODE_4222	3-26_bin.10	d__Bacteria;p__Proteobacteria;c__Alphaproteobacteria;o__Sphingomonadales;f__Sphingomonadaceae;g__Sphingobium;s__	CRISPR_spacer	c__Alphaproteobacteria	g__Sphingobium	o__Sphingomonadales
5-5_NODE_1065	3-26_bin.10	d__Bacteria;p__Proteobacteria;c__Alphaproteobacteria;o__Sphingomonadales;f__Sphingomonadaceae;g__Sphingobium;s__	CRISPR_spacer	c__Alphaproteobacteria	g__Sphingobium	o__Sphingomonadales
1-1_NODE_2358	3-26_bin.10	d__Bacteria;p__Proteobacteria;c__Alphaproteobacteria;o__Sphingomonadales;f__Sphingomonadaceae;g__Sphingobium;s__	CRISPR_spacer	c__Alphaproteobacteria	g__Sphingobium	o__Sphingomonadales
2-56_NODE_1095	3-26_bin.10	d__Bacteria;p__Proteobacteria;c__Alphaproteobacteria;o__Sphingomonadales;f__Sphingomonadaceae;g__Sphingobium;s__	CRISPR_spacer	c__Alphaproteobacteria	g__Sphingobium	o__Sphingomonadales
3-5_NODE_244	3-26_bin.10	d__Bacteria;p__Proteobacteria;c__Alphaproteobacteria;o__Sphingomonadales;f__Sphingomonadaceae;g__Sphingobium;s__	CRISPR_spacer	c__Alphaproteobacteria	g__Sphingobium	o__Sphingomonadales
4-2_NODE_2904	3-26_bin.10	d__Bacteria;p__Proteobacteria;c__Alphaproteobacteria;o__Sphingomonadales;f__Sphingomonadaceae;g__Sphingobium;s__	CRISPR_spacer	c__Alphaproteobacteria	g__Sphingobium	o__Sphingomonadales
3-5_NODE_46	3-26_bin.10	d__Bacteria;p__Proteobacteria;c__Alphaproteobacteria;o__Sphingomonadales;f__Sphingomonadaceae;g__Sphingobium;s__	CRISPR_spacer	c__Alphaproteobacteria	g__Sphingobium	o__Sphingomonadales
3-5_NODE_1244	3-26_bin.10	d__Bacteria;p__Proteobacteria;c__Alphaproteobacteria;o__Sphingomonadales;f__Sphingomonadaceae;g__Sphingobium;s__	CRISPR_spacer	c__Alphaproteobacteria	g__Sphingobium	o__Sphingomonadales
6-3_NODE_4311	3-26_bin.10	d__Bacteria;p__Proteobacteria;c__Alphaproteobacteria;o__Sphingomonadales;f__Sphingomonadaceae;g__Sphingobium;s__	CRISPR_spacer	c__Alphaproteobacteria	g__Sphingobium	o__Sphingomonadales
2-4_NODE_451	3-26_bin.10	d__Bacteria;p__Proteobacteria;c__Alphaproteobacteria;o__Sphingomonadales;f__Sphingomonadaceae;g__Sphingobium;s__	CRISPR_spacer	c__Alphaproteobacteria	g__Sphingobium	o__Sphingomonadales
1-1_NODE_15	3-26_bin.10	d__Bacteria;p__Proteobacteria;c__Alphaproteobacteria;o__Sphingomonadales;f__Sphingomonadaceae;g__Sphingobium;s__	CRISPR_spacer	c__Alphaproteobacteria	g__Sphingobium	o__Sphingomonadales
8-4_NODE_752	3-26_bin.10	d__Bacteria;p__Proteobacteria;c__Alphaproteobacteria;o__Sphingomonadales;f__Sphingomonadaceae;g__Sphingobium;s__	CRISPR_spacer	c__Alphaproteobacteria	g__Sphingobium	o__Sphingomonadales
8-3_NODE_45	3-26_bin.10	d__Bacteria;p__Proteobacteria;c__Alphaproteobacteria;o__Sphingomonadales;f__Sphingomonadaceae;g__Sphingobium;s__	CRISPR_spacer	c__Alphaproteobacteria	g__Sphingobium	o__Sphingomonadales
6-4_NODE_4541	3-26_bin.10	d__Bacteria;p__Proteobacteria;c__Alphaproteobacteria;o__Sphingomonadales;f__Sphingomonadaceae;g__Sphingobium;s__	CRISPR_spacer	c__Alphaproteobacteria	g__Sphingobium	o__Sphingomonadales
6-3_NODE_218	3-26_bin.10	d__Bacteria;p__Proteobacteria;c__Alphaproteobacteria;o__Sphingomonadales;f__Sphingomonadaceae;g__Sphingobium;s__	CRISPR_spacer	c__Alphaproteobacteria	g__Sphingobium	o__Sphingomonadales
6-2_NODE_229	3-26_bin.10	d__Bacteria;p__Proteobacteria;c__Alphaproteobacteria;o__Sphingomonadales;f__Sphingomonadaceae;g__Sphingobium;s__	CRISPR_spacer	c__Alphaproteobacteria	g__Sphingobium	o__Sphingomonadales
6-4_NODE_104	3-26_bin.10	d__Bacteria;p__Proteobacteria;c__Alphaproteobacteria;o__Sphingomonadales;f__Sphingomonadaceae;g__Sphingobium;s__	CRISPR_spacer	c__Alphaproteobacteria	g__Sphingobium	o__Sphingomonadales
4-6_NODE_1683	3-26_bin.10	d__Bacteria;p__Proteobacteria;c__Alphaproteobacteria;o__Sphingomonadales;f__Sphingomonadaceae;g__Sphingobium;s__	CRISPR_spacer	c__Alphaproteobacteria	g__Sphingobium	o__Sphingomonadales
8-5_NODE_102_1	3-26_bin.10	d__Bacteria;p__Proteobacteria;c__Alphaproteobacteria;o__Sphingomonadales;f__Sphingomonadaceae;g__Sphingobium;s__	CRISPR_spacer	c__Alphaproteobacteria	g__Sphingobium	o__Sphingomonadales
7-1_NODE_37	3-26_bin.10	d__Bacteria;p__Proteobacteria;c__Alphaproteobacteria;o__Sphingomonadales;f__Sphingomonadaceae;g__Sphingobium;s__	CRISPR_spacer	c__Alphaproteobacteria	g__Sphingobium	o__Sphingomonadales
4-2_NODE_2928	3-26_bin.10	d__Bacteria;p__Proteobacteria;c__Alphaproteobacteria;o__Sphingomonadales;f__Sphingomonadaceae;g__Sphingobium;s__	CRISPR_spacer	c__Alphaproteobacteria	g__Sphingobium	o__Sphingomonadales
7-2_NODE_3942	3-26_bin.10	d__Bacteria;p__Proteobacteria;c__Alphaproteobacteria;o__Sphingomonadales;f__Sphingomonadaceae;g__Sphingobium;s__	CRISPR_spacer	c__Alphaproteobacteria	g__Sphingobium	o__Sphingomonadales
7-6_NODE_677	3-26_bin.10	d__Bacteria;p__Proteobacteria;c__Alphaproteobacteria;o__Sphingomonadales;f__Sphingomonadaceae;g__Sphingobium;s__	CRISPR_spacer	c__Alphaproteobacteria	g__Sphingobium	o__Sphingomonadales
5-7_NODE_1484	3-26_bin.10	d__Bacteria;p__Proteobacteria;c__Alphaproteobacteria;o__Sphingomonadales;f__Sphingomonadaceae;g__Sphingobium;s__	CRISPR_spacer	c__Alphaproteobacteria	g__Sphingobium	o__Sphingomonadales
5-7_NODE_254	3-26_bin.6	d__Bacteria;p__Acidobacteriota;c__Thermoanaerobaculia;o__UBA5066;f__Gp7-AA6;g__Gp7-AA6;s__	CRISPR_spacer	c__Thermoanaerobaculia	g__Gp7-AA6	o__UBA5066
5-5_NODE_3324	3-26_bin.6	d__Bacteria;p__Acidobacteriota;c__Thermoanaerobaculia;o__UBA5066;f__Gp7-AA6;g__Gp7-AA6;s__	CRISPR_spacer	c__Thermoanaerobaculia	g__Gp7-AA6	o__UBA5066
7-6_NODE_2638	3-26_bin.6	d__Bacteria;p__Acidobacteriota;c__Thermoanaerobaculia;o__UBA5066;f__Gp7-AA6;g__Gp7-AA6;s__	CRISPR_spacer	c__Thermoanaerobaculia	g__Gp7-AA6	o__UBA5066
6-4_NODE_240	3-26_bin.6	d__Bacteria;p__Acidobacteriota;c__Thermoanaerobaculia;o__UBA5066;f__Gp7-AA6;g__Gp7-AA6;s__	CRISPR_spacer	c__Thermoanaerobaculia	g__Gp7-AA6	o__UBA5066
8-4_NODE_1307	3-26_bin.6	d__Bacteria;p__Acidobacteriota;c__Thermoanaerobaculia;o__UBA5066;f__Gp7-AA6;g__Gp7-AA6;s__	CRISPR_spacer	c__Thermoanaerobaculia	g__Gp7-AA6	o__UBA5066
3-5_NODE_1111	3-26_bin.6	d__Bacteria;p__Acidobacteriota;c__Thermoanaerobaculia;o__UBA5066;f__Gp7-AA6;g__Gp7-AA6;s__	CRISPR_spacer	c__Thermoanaerobaculia	g__Gp7-AA6	o__UBA5066
5-7_NODE_2548	3-26_bin.6	d__Bacteria;p__Acidobacteriota;c__Thermoanaerobaculia;o__UBA5066;f__Gp7-AA6;g__Gp7-AA6;s__	CRISPR_spacer	c__Thermoanaerobaculia	g__Gp7-AA6	o__UBA5066
5-5_NODE_4256_1	4-6_bin.3	d__Bacteria;p__Nitrospirota;c__Nitrospiria;o__Nitrospirales;f__Nitrospiraceae;g__Palsa-1315;s__	CRISPR_spacer	c__Nitrospiria	g__Palsa-1315	o__Nitrospirales
4-7_NODE_124	4-6_bin.3	d__Bacteria;p__Nitrospirota;c__Nitrospiria;o__Nitrospirales;f__Nitrospiraceae;g__Palsa-1315;s__	CRISPR_spacer	c__Nitrospiria	g__Palsa-1315	o__Nitrospirales
2-4_NODE_20	6-2_bin.1	d__Bacteria;p__Acidobacteriota;c__Blastocatellia;o__UBA7656;f__UBA7656;g__JADGNW01;s__	CRISPR_spacer	c__Blastocatellia	g__JADGNW01	o__UBA7656
6-3_NODE_139	6-2_bin.1	d__Bacteria;p__Acidobacteriota;c__Blastocatellia;o__UBA7656;f__UBA7656;g__JADGNW01;s__	CRISPR_spacer	c__Blastocatellia	g__JADGNW01	o__UBA7656
6-2_NODE_45	6-2_bin.1	d__Bacteria;p__Acidobacteriota;c__Blastocatellia;o__UBA7656;f__UBA7656;g__JADGNW01;s__	CRISPR_spacer	c__Blastocatellia	g__JADGNW01	o__UBA7656
5-7_NODE_648	6-2_bin.1	d__Bacteria;p__Acidobacteriota;c__Blastocatellia;o__UBA7656;f__UBA7656;g__JADGNW01;s__	CRISPR_spacer	c__Blastocatellia	g__JADGNW01	o__UBA7656
5-6_NODE_2027	6-2_bin.1	d__Bacteria;p__Acidobacteriota;c__Blastocatellia;o__UBA7656;f__UBA7656;g__JADGNW01;s__	CRISPR_spacer	c__Blastocatellia	g__JADGNW01	o__UBA7656
6-3_NODE_73	6-2_bin.1	d__Bacteria;p__Acidobacteriota;c__Blastocatellia;o__UBA7656;f__UBA7656;g__JADGNW01;s__	CRISPR_spacer	c__Blastocatellia	g__JADGNW01	o__UBA7656
8-5_NODE_151	6-2_bin.6	d__Bacteria;p__Acidobacteriota;c__Blastocatellia;o__Pyrinomonadales;f__Pyrinomonadaceae;g__PSRF01;s__	CRISPR_spacer	c__Blastocatellia	g__PSRF01	o__Pyrinomonadales
4-7_NODE_4_fragment_1	6-2_bin.6	d__Bacteria;p__Acidobacteriota;c__Blastocatellia;o__Pyrinomonadales;f__Pyrinomonadaceae;g__PSRF01;s__	CRISPR_spacer	c__Blastocatellia	g__PSRF01	o__Pyrinomonadales
4-7_NODE_4	6-2_bin.6	d__Bacteria;p__Acidobacteriota;c__Blastocatellia;o__Pyrinomonadales;f__Pyrinomonadaceae;g__PSRF01;s__	CRISPR_spacer	c__Blastocatellia	g__PSRF01	o__Pyrinomonadales
7-6_NODE_4486	6-2_bin.6	d__Bacteria;p__Acidobacteriota;c__Blastocatellia;o__Pyrinomonadales;f__Pyrinomonadaceae;g__PSRF01;s__	CRISPR_spacer	c__Blastocatellia	g__PSRF01	o__Pyrinomonadales
7-1_NODE_1262	6-2_bin.6	d__Bacteria;p__Acidobacteriota;c__Blastocatellia;o__Pyrinomonadales;f__Pyrinomonadaceae;g__PSRF01;s__	CRISPR_spacer	c__Blastocatellia	g__PSRF01	o__Pyrinomonadales
3-26_NODE_516	6-2_bin.6	d__Bacteria;p__Acidobacteriota;c__Blastocatellia;o__Pyrinomonadales;f__Pyrinomonadaceae;g__PSRF01;s__	CRISPR_spacer	c__Blastocatellia	g__PSRF01	o__Pyrinomonadales
4-6_NODE_286	6-2_bin.6	d__Bacteria;p__Acidobacteriota;c__Blastocatellia;o__Pyrinomonadales;f__Pyrinomonadaceae;g__PSRF01;s__	CRISPR_spacer	c__Blastocatellia	g__PSRF01	o__Pyrinomonadales
6-2_NODE_7022	6-2_bin.6	d__Bacteria;p__Acidobacteriota;c__Blastocatellia;o__Pyrinomonadales;f__Pyrinomonadaceae;g__PSRF01;s__	CRISPR_spacer	c__Blastocatellia	g__PSRF01	o__Pyrinomonadales
8-4_NODE_77	6-3_bin.6	d__Bacteria;p__Acidobacteriota;c__Blastocatellia;o__UBA7656;f__UBA7656;g__JADGNW01;s__	CRISPR_spacer	c__Blastocatellia	g__JADGNW01	o__UBA7656
6-4_NODE_1886	6-3_bin.6	d__Bacteria;p__Acidobacteriota;c__Blastocatellia;o__UBA7656;f__UBA7656;g__JADGNW01;s__	CRISPR_spacer	c__Blastocatellia	g__JADGNW01	o__UBA7656
6-3_NODE_210	6-3_bin.6	d__Bacteria;p__Acidobacteriota;c__Blastocatellia;o__UBA7656;f__UBA7656;g__JADGNW01;s__	CRISPR_spacer	c__Blastocatellia	g__JADGNW01	o__UBA7656
7-6_NODE_2243	6-3_bin.6	d__Bacteria;p__Acidobacteriota;c__Blastocatellia;o__UBA7656;f__UBA7656;g__JADGNW01;s__	CRISPR_spacer	c__Blastocatellia	g__JADGNW01	o__UBA7656
6-4_NODE_129	6-3_bin.6	d__Bacteria;p__Acidobacteriota;c__Blastocatellia;o__UBA7656;f__UBA7656;g__JADGNW01;s__	CRISPR_spacer	c__Blastocatellia	g__JADGNW01	o__UBA7656
2-4_NODE_831	6-3_bin.6	d__Bacteria;p__Acidobacteriota;c__Blastocatellia;o__UBA7656;f__UBA7656;g__JADGNW01;s__	CRISPR_spacer	c__Blastocatellia	g__JADGNW01	o__UBA7656
4-7_NODE_888	6-3_bin.6	d__Bacteria;p__Acidobacteriota;c__Blastocatellia;o__UBA7656;f__UBA7656;g__JADGNW01;s__	CRISPR_spacer	c__Blastocatellia	g__JADGNW01	o__UBA7656
2-56_NODE_473	6-3_bin.6	d__Bacteria;p__Acidobacteriota;c__Blastocatellia;o__UBA7656;f__UBA7656;g__JADGNW01;s__	CRISPR_spacer	c__Blastocatellia	g__JADGNW01	o__UBA7656
4-6_NODE_256	6-3_bin.6	d__Bacteria;p__Acidobacteriota;c__Blastocatellia;o__UBA7656;f__UBA7656;g__JADGNW01;s__	CRISPR_spacer	c__Blastocatellia	g__JADGNW01	o__UBA7656
7-1_NODE_1387	6-3_bin.6	d__Bacteria;p__Acidobacteriota;c__Blastocatellia;o__UBA7656;f__UBA7656;g__JADGNW01;s__	CRISPR_spacer	c__Blastocatellia	g__JADGNW01	o__UBA7656
8-4_NODE_3634	6-3_bin.6	d__Bacteria;p__Acidobacteriota;c__Blastocatellia;o__UBA7656;f__UBA7656;g__JADGNW01;s__	CRISPR_spacer	c__Blastocatellia	g__JADGNW01	o__UBA7656
7-6_NODE_613	6-3_bin.6	d__Bacteria;p__Acidobacteriota;c__Blastocatellia;o__UBA7656;f__UBA7656;g__JADGNW01;s__	CRISPR_spacer	c__Blastocatellia	g__JADGNW01	o__UBA7656
3-4_NODE_304	7-2_bin.13	d__Bacteria;p__Methylomirabilota;c__Methylomirabilia;o__Rokubacteriales;f__CSP1-6;g__;s__	CRISPR_spacer	c__Methylomirabilia	g__	o__Rokubacteriales
8-5_NODE_182	7-2_bin.13	d__Bacteria;p__Methylomirabilota;c__Methylomirabilia;o__Rokubacteriales;f__CSP1-6;g__;s__	CRISPR_spacer	c__Methylomirabilia	g__	o__Rokubacteriales
4-7_NODE_434	7-2_bin.13	d__Bacteria;p__Methylomirabilota;c__Methylomirabilia;o__Rokubacteriales;f__CSP1-6;g__;s__	CRISPR_spacer	c__Methylomirabilia	g__	o__Rokubacteriales
3-4_NODE_283	7-2_bin.13	d__Bacteria;p__Methylomirabilota;c__Methylomirabilia;o__Rokubacteriales;f__CSP1-6;g__;s__	CRISPR_spacer	c__Methylomirabilia	g__	o__Rokubacteriales
5-6_NODE_719	7-2_bin.13	d__Bacteria;p__Methylomirabilota;c__Methylomirabilia;o__Rokubacteriales;f__CSP1-6;g__;s__	CRISPR_spacer	c__Methylomirabilia	g__	o__Rokubacteriales
6-2_NODE_2938	7-2_bin.13	d__Bacteria;p__Methylomirabilota;c__Methylomirabilia;o__Rokubacteriales;f__CSP1-6;g__;s__	CRISPR_spacer	c__Methylomirabilia	g__	o__Rokubacteriales
6-4_NODE_5917	7-2_bin.13	d__Bacteria;p__Methylomirabilota;c__Methylomirabilia;o__Rokubacteriales;f__CSP1-6;g__;s__	CRISPR_spacer	c__Methylomirabilia	g__	o__Rokubacteriales
8-3_NODE_4388	7-2_bin.13	d__Bacteria;p__Methylomirabilota;c__Methylomirabilia;o__Rokubacteriales;f__CSP1-6;g__;s__	CRISPR_spacer	c__Methylomirabilia	g__	o__Rokubacteriales
2-4_NODE_629	7-2_bin.13	d__Bacteria;p__Methylomirabilota;c__Methylomirabilia;o__Rokubacteriales;f__CSP1-6;g__;s__	CRISPR_spacer	c__Methylomirabilia	g__	o__Rokubacteriales
4-2_NODE_4395	7-2_bin.13	d__Bacteria;p__Methylomirabilota;c__Methylomirabilia;o__Rokubacteriales;f__CSP1-6;g__;s__	CRISPR_spacer	c__Methylomirabilia	g__	o__Rokubacteriales
2-4_NODE_1701	7-2_bin.13	d__Bacteria;p__Methylomirabilota;c__Methylomirabilia;o__Rokubacteriales;f__CSP1-6;g__;s__	CRISPR_spacer	c__Methylomirabilia	g__	o__Rokubacteriales
3-26_NODE_890	7-2_bin.13	d__Bacteria;p__Methylomirabilota;c__Methylomirabilia;o__Rokubacteriales;f__CSP1-6;g__;s__	CRISPR_spacer	c__Methylomirabilia	g__	o__Rokubacteriales
6-3_NODE_1370	7-2_bin.13	d__Bacteria;p__Methylomirabilota;c__Methylomirabilia;o__Rokubacteriales;f__CSP1-6;g__;s__	CRISPR_spacer	c__Methylomirabilia	g__	o__Rokubacteriales
6-3_NODE_5731	7-2_bin.13	d__Bacteria;p__Methylomirabilota;c__Methylomirabilia;o__Rokubacteriales;f__CSP1-6;g__;s__	CRISPR_spacer	c__Methylomirabilia	g__	o__Rokubacteriales
5-5_NODE_1681	7-2_bin.13	d__Bacteria;p__Methylomirabilota;c__Methylomirabilia;o__Rokubacteriales;f__CSP1-6;g__;s__	CRISPR_spacer	c__Methylomirabilia	g__	o__Rokubacteriales
8-5_NODE_43	7-2_bin.13	d__Bacteria;p__Methylomirabilota;c__Methylomirabilia;o__Rokubacteriales;f__CSP1-6;g__;s__	CRISPR_spacer	c__Methylomirabilia	g__	o__Rokubacteriales
6-2_NODE_1499	7-2_bin.13	d__Bacteria;p__Methylomirabilota;c__Methylomirabilia;o__Rokubacteriales;f__CSP1-6;g__;s__	CRISPR_spacer	c__Methylomirabilia	g__	o__Rokubacteriales
6-3_NODE_1790	7-2_bin.13	d__Bacteria;p__Methylomirabilota;c__Methylomirabilia;o__Rokubacteriales;f__CSP1-6;g__;s__	CRISPR_spacer	c__Methylomirabilia	g__	o__Rokubacteriales
8-5_NODE_627	7-2_bin.13	d__Bacteria;p__Methylomirabilota;c__Methylomirabilia;o__Rokubacteriales;f__CSP1-6;g__;s__	CRISPR_spacer	c__Methylomirabilia	g__	o__Rokubacteriales
4-2_NODE_1122	7-2_bin.13	d__Bacteria;p__Methylomirabilota;c__Methylomirabilia;o__Rokubacteriales;f__CSP1-6;g__;s__	CRISPR_spacer	c__Methylomirabilia	g__	o__Rokubacteriales
7-1_NODE_4546	7-2_bin.13	d__Bacteria;p__Methylomirabilota;c__Methylomirabilia;o__Rokubacteriales;f__CSP1-6;g__;s__	CRISPR_spacer	c__Methylomirabilia	g__	o__Rokubacteriales
5-5_NODE_1829	7-2_bin.13	d__Bacteria;p__Methylomirabilota;c__Methylomirabilia;o__Rokubacteriales;f__CSP1-6;g__;s__	CRISPR_spacer	c__Methylomirabilia	g__	o__Rokubacteriales
2-56_NODE_1208	7-2_bin.13	d__Bacteria;p__Methylomirabilota;c__Methylomirabilia;o__Rokubacteriales;f__CSP1-6;g__;s__	CRISPR_spacer	c__Methylomirabilia	g__	o__Rokubacteriales
6-3_NODE_1808	7-2_bin.13	d__Bacteria;p__Methylomirabilota;c__Methylomirabilia;o__Rokubacteriales;f__CSP1-6;g__;s__	CRISPR_spacer	c__Methylomirabilia	g__	o__Rokubacteriales
4-2_NODE_2632	7-2_bin.13	d__Bacteria;p__Methylomirabilota;c__Methylomirabilia;o__Rokubacteriales;f__CSP1-6;g__;s__	CRISPR_spacer	c__Methylomirabilia	g__	o__Rokubacteriales
2-56_NODE_3302	7-2_bin.2	d__Bacteria;p__Tectomicrobia;c__Entotheonellia;o__Entotheonellales;f__Entotheonellaceae;g__SXND01;s__	CRISPR_spacer	c__Entotheonellia	g__SXND01	o__Entotheonellales
7-1_NODE_855	7-2_bin.2	d__Bacteria;p__Tectomicrobia;c__Entotheonellia;o__Entotheonellales;f__Entotheonellaceae;g__SXND01;s__	CRISPR_spacer	c__Entotheonellia	g__SXND01	o__Entotheonellales
2-4_NODE_1924	7-2_bin.2	d__Bacteria;p__Tectomicrobia;c__Entotheonellia;o__Entotheonellales;f__Entotheonellaceae;g__SXND01;s__	CRISPR_spacer	c__Entotheonellia	g__SXND01	o__Entotheonellales
7-6_NODE_1265	7-2_bin.2	d__Bacteria;p__Tectomicrobia;c__Entotheonellia;o__Entotheonellales;f__Entotheonellaceae;g__SXND01;s__	CRISPR_spacer	c__Entotheonellia	g__SXND01	o__Entotheonellales
8-3_NODE_1130	7-2_bin.2	d__Bacteria;p__Tectomicrobia;c__Entotheonellia;o__Entotheonellales;f__Entotheonellaceae;g__SXND01;s__	CRISPR_spacer	c__Entotheonellia	g__SXND01	o__Entotheonellales
8-4_NODE_1132	7-2_bin.2	d__Bacteria;p__Tectomicrobia;c__Entotheonellia;o__Entotheonellales;f__Entotheonellaceae;g__SXND01;s__	CRISPR_spacer	c__Entotheonellia	g__SXND01	o__Entotheonellales
8-5_NODE_19	7-2_vamb_4504	d__Bacteria;p__Proteobacteria;c__Gammaproteobacteria;o__Burkholderiales;f__Burkholderiaceae;g__Janthinobacterium;s__	CRISPR_spacer	c__Gammaproteobacteria	g__Janthinobacterium	o__Burkholderiales
8-4_NODE_39	7-2_vamb_4504	d__Bacteria;p__Proteobacteria;c__Gammaproteobacteria;o__Burkholderiales;f__Burkholderiaceae;g__Janthinobacterium;s__	CRISPR_spacer	c__Gammaproteobacteria	g__Janthinobacterium	o__Burkholderiales
3-4_NODE_1072	7-2_vamb_4504	d__Bacteria;p__Proteobacteria;c__Gammaproteobacteria;o__Burkholderiales;f__Burkholderiaceae;g__Janthinobacterium;s__	CRISPR_spacer	c__Gammaproteobacteria	g__Janthinobacterium	o__Burkholderiales
8-4_NODE_2835	7-2_vamb_4504	d__Bacteria;p__Proteobacteria;c__Gammaproteobacteria;o__Burkholderiales;f__Burkholderiaceae;g__Janthinobacterium;s__	CRISPR_spacer	c__Gammaproteobacteria	g__Janthinobacterium	o__Burkholderiales
8-3_NODE_1500	7-2_vamb_4504	d__Bacteria;p__Proteobacteria;c__Gammaproteobacteria;o__Burkholderiales;f__Burkholderiaceae;g__Janthinobacterium;s__	CRISPR_spacer	c__Gammaproteobacteria	g__Janthinobacterium	o__Burkholderiales
8-3_NODE_1446	7-2_vamb_4504	d__Bacteria;p__Proteobacteria;c__Gammaproteobacteria;o__Burkholderiales;f__Burkholderiaceae;g__Janthinobacterium;s__	CRISPR_spacer	c__Gammaproteobacteria	g__Janthinobacterium	o__Burkholderiales
3-5_NODE_684	7-2_vamb_4504	d__Bacteria;p__Proteobacteria;c__Gammaproteobacteria;o__Burkholderiales;f__Burkholderiaceae;g__Janthinobacterium;s__	CRISPR_spacer	c__Gammaproteobacteria	g__Janthinobacterium	o__Burkholderiales
7-2_NODE_2351	7-2_vamb_4504	d__Bacteria;p__Proteobacteria;c__Gammaproteobacteria;o__Burkholderiales;f__Burkholderiaceae;g__Janthinobacterium;s__	CRISPR_spacer	c__Gammaproteobacteria	g__Janthinobacterium	o__Burkholderiales
5-5_NODE_1628	7-2_vamb_4504	d__Bacteria;p__Proteobacteria;c__Gammaproteobacteria;o__Burkholderiales;f__Burkholderiaceae;g__Janthinobacterium;s__	CRISPR_spacer	c__Gammaproteobacteria	g__Janthinobacterium	o__Burkholderiales
8-4_NODE_3011	7-2_vamb_4504	d__Bacteria;p__Proteobacteria;c__Gammaproteobacteria;o__Burkholderiales;f__Burkholderiaceae;g__Janthinobacterium;s__	CRISPR_spacer	c__Gammaproteobacteria	g__Janthinobacterium	o__Burkholderiales
6-3_NODE_1211	7-2_vamb_4504	d__Bacteria;p__Proteobacteria;c__Gammaproteobacteria;o__Burkholderiales;f__Burkholderiaceae;g__Janthinobacterium;s__	CRISPR_spacer	c__Gammaproteobacteria	g__Janthinobacterium	o__Burkholderiales
7-2_NODE_2005	7-2_vamb_4504	d__Bacteria;p__Proteobacteria;c__Gammaproteobacteria;o__Burkholderiales;f__Burkholderiaceae;g__Janthinobacterium;s__	CRISPR_spacer	c__Gammaproteobacteria	g__Janthinobacterium	o__Burkholderiales
7-6_NODE_655_1	7-2_vamb_4504	d__Bacteria;p__Proteobacteria;c__Gammaproteobacteria;o__Burkholderiales;f__Burkholderiaceae;g__Janthinobacterium;s__	CRISPR_spacer	c__Gammaproteobacteria	g__Janthinobacterium	o__Burkholderiales
4-7_NODE_1026	7-2_vamb_4504	d__Bacteria;p__Proteobacteria;c__Gammaproteobacteria;o__Burkholderiales;f__Burkholderiaceae;g__Janthinobacterium;s__	CRISPR_spacer	c__Gammaproteobacteria	g__Janthinobacterium	o__Burkholderiales
8-5_NODE_1038	7-2_vamb_4504	d__Bacteria;p__Proteobacteria;c__Gammaproteobacteria;o__Burkholderiales;f__Burkholderiaceae;g__Janthinobacterium;s__	CRISPR_spacer	c__Gammaproteobacteria	g__Janthinobacterium	o__Burkholderiales
4-6_NODE_512	7-2_vamb_4504	d__Bacteria;p__Proteobacteria;c__Gammaproteobacteria;o__Burkholderiales;f__Burkholderiaceae;g__Janthinobacterium;s__	CRISPR_spacer	c__Gammaproteobacteria	g__Janthinobacterium	o__Burkholderiales
8-5_NODE_1281	7-2_vamb_4504	d__Bacteria;p__Proteobacteria;c__Gammaproteobacteria;o__Burkholderiales;f__Burkholderiaceae;g__Janthinobacterium;s__	CRISPR_spacer	c__Gammaproteobacteria	g__Janthinobacterium	o__Burkholderiales
2-4_NODE_2974	7-2_vamb_4504	d__Bacteria;p__Proteobacteria;c__Gammaproteobacteria;o__Burkholderiales;f__Burkholderiaceae;g__Janthinobacterium;s__	CRISPR_spacer	c__Gammaproteobacteria	g__Janthinobacterium	o__Burkholderiales
8-4_NODE_4770	7-2_vamb_4504	d__Bacteria;p__Proteobacteria;c__Gammaproteobacteria;o__Burkholderiales;f__Burkholderiaceae;g__Janthinobacterium;s__	CRISPR_spacer	c__Gammaproteobacteria	g__Janthinobacterium	o__Burkholderiales
2-4_NODE_799	7-2_vamb_4504	d__Bacteria;p__Proteobacteria;c__Gammaproteobacteria;o__Burkholderiales;f__Burkholderiaceae;g__Janthinobacterium;s__	CRISPR_spacer	c__Gammaproteobacteria	g__Janthinobacterium	o__Burkholderiales
5-5_NODE_1269	7-2_vamb_4504	d__Bacteria;p__Proteobacteria;c__Gammaproteobacteria;o__Burkholderiales;f__Burkholderiaceae;g__Janthinobacterium;s__	CRISPR_spacer	c__Gammaproteobacteria	g__Janthinobacterium	o__Burkholderiales
7-6_NODE_1077	7-2_vamb_4504	d__Bacteria;p__Proteobacteria;c__Gammaproteobacteria;o__Burkholderiales;f__Burkholderiaceae;g__Janthinobacterium;s__	CRISPR_spacer	c__Gammaproteobacteria	g__Janthinobacterium	o__Burkholderiales
4-2_NODE_3011	7-2_vamb_4504	d__Bacteria;p__Proteobacteria;c__Gammaproteobacteria;o__Burkholderiales;f__Burkholderiaceae;g__Janthinobacterium;s__	CRISPR_spacer	c__Gammaproteobacteria	g__Janthinobacterium	o__Burkholderiales
7-6_NODE_3997	7-2_vamb_4504	d__Bacteria;p__Proteobacteria;c__Gammaproteobacteria;o__Burkholderiales;f__Burkholderiaceae;g__Janthinobacterium;s__	CRISPR_spacer	c__Gammaproteobacteria	g__Janthinobacterium	o__Burkholderiales
3-5_NODE_1310_fragment_2_1	7-2_vamb_4504	d__Bacteria;p__Proteobacteria;c__Gammaproteobacteria;o__Burkholderiales;f__Burkholderiaceae;g__Janthinobacterium;s__	CRISPR_spacer	c__Gammaproteobacteria	g__Janthinobacterium	o__Burkholderiales
6-2_NODE_549	7-2_vamb_4504	d__Bacteria;p__Proteobacteria;c__Gammaproteobacteria;o__Burkholderiales;f__Burkholderiaceae;g__Janthinobacterium;s__	CRISPR_spacer	c__Gammaproteobacteria	g__Janthinobacterium	o__Burkholderiales
4-7_NODE_1198	7-2_vamb_4504	d__Bacteria;p__Proteobacteria;c__Gammaproteobacteria;o__Burkholderiales;f__Burkholderiaceae;g__Janthinobacterium;s__	CRISPR_spacer	c__Gammaproteobacteria	g__Janthinobacterium	o__Burkholderiales
5-6_NODE_941	7-2_vamb_4504	d__Bacteria;p__Proteobacteria;c__Gammaproteobacteria;o__Burkholderiales;f__Burkholderiaceae;g__Janthinobacterium;s__	CRISPR_spacer	c__Gammaproteobacteria	g__Janthinobacterium	o__Burkholderiales
8-5_NODE_2711	7-2_vamb_4504	d__Bacteria;p__Proteobacteria;c__Gammaproteobacteria;o__Burkholderiales;f__Burkholderiaceae;g__Janthinobacterium;s__	CRISPR_spacer	c__Gammaproteobacteria	g__Janthinobacterium	o__Burkholderiales
2-56_NODE_521	7-2_vamb_4504	d__Bacteria;p__Proteobacteria;c__Gammaproteobacteria;o__Burkholderiales;f__Burkholderiaceae;g__Janthinobacterium;s__	CRISPR_spacer	c__Gammaproteobacteria	g__Janthinobacterium	o__Burkholderiales
6-2_NODE_1275	7-2_vamb_4504	d__Bacteria;p__Proteobacteria;c__Gammaproteobacteria;o__Burkholderiales;f__Burkholderiaceae;g__Janthinobacterium;s__	CRISPR_spacer	c__Gammaproteobacteria	g__Janthinobacterium	o__Burkholderiales
6-2_NODE_7324	7-2_vamb_4504	d__Bacteria;p__Proteobacteria;c__Gammaproteobacteria;o__Burkholderiales;f__Burkholderiaceae;g__Janthinobacterium;s__	CRISPR_spacer	c__Gammaproteobacteria	g__Janthinobacterium	o__Burkholderiales
8-5_NODE_1418	7-2_vamb_4504	d__Bacteria;p__Proteobacteria;c__Gammaproteobacteria;o__Burkholderiales;f__Burkholderiaceae;g__Janthinobacterium;s__	CRISPR_spacer	c__Gammaproteobacteria	g__Janthinobacterium	o__Burkholderiales
7-2_NODE_3678	7-2_vamb_4504	d__Bacteria;p__Proteobacteria;c__Gammaproteobacteria;o__Burkholderiales;f__Burkholderiaceae;g__Janthinobacterium;s__	CRISPR_spacer	c__Gammaproteobacteria	g__Janthinobacterium	o__Burkholderiales
4-2_NODE_633	7-2_vamb_4504	d__Bacteria;p__Proteobacteria;c__Gammaproteobacteria;o__Burkholderiales;f__Burkholderiaceae;g__Janthinobacterium;s__	CRISPR_spacer	c__Gammaproteobacteria	g__Janthinobacterium	o__Burkholderiales
5-5_NODE_481	7-2_vamb_4504	d__Bacteria;p__Proteobacteria;c__Gammaproteobacteria;o__Burkholderiales;f__Burkholderiaceae;g__Janthinobacterium;s__	CRISPR_spacer	c__Gammaproteobacteria	g__Janthinobacterium	o__Burkholderiales
5-5_NODE_4900	7-2_vamb_4504	d__Bacteria;p__Proteobacteria;c__Gammaproteobacteria;o__Burkholderiales;f__Burkholderiaceae;g__Janthinobacterium;s__	CRISPR_spacer	c__Gammaproteobacteria	g__Janthinobacterium	o__Burkholderiales
3-5_NODE_2012	7-2_vamb_4504	d__Bacteria;p__Proteobacteria;c__Gammaproteobacteria;o__Burkholderiales;f__Burkholderiaceae;g__Janthinobacterium;s__	CRISPR_spacer	c__Gammaproteobacteria	g__Janthinobacterium	o__Burkholderiales
5-6_NODE_571	7-6_bin.13	d__Archaea;p__Thermoproteota;c__Nitrososphaeria;o__Nitrososphaerales;f__Nitrosopumilaceae;g__TA-20;s__	CRISPR_spacer	c__Nitrososphaeria	g__TA-20	o__Nitrososphaerales
5-5_NODE_209	7-6_bin.13	d__Archaea;p__Thermoproteota;c__Nitrososphaeria;o__Nitrososphaerales;f__Nitrosopumilaceae;g__TA-20;s__	CRISPR_spacer	c__Nitrososphaeria	g__TA-20	o__Nitrososphaerales
7-6_NODE_2023	7-6_bin.13	d__Archaea;p__Thermoproteota;c__Nitrososphaeria;o__Nitrososphaerales;f__Nitrosopumilaceae;g__TA-20;s__	CRISPR_spacer	c__Nitrososphaeria	g__TA-20	o__Nitrososphaerales
4-7_NODE_1421	7-6_bin.13	d__Archaea;p__Thermoproteota;c__Nitrososphaeria;o__Nitrososphaerales;f__Nitrosopumilaceae;g__TA-20;s__	CRISPR_spacer	c__Nitrososphaeria	g__TA-20	o__Nitrososphaerales
1-8_NODE_231	7-6_bin.13	d__Archaea;p__Thermoproteota;c__Nitrososphaeria;o__Nitrososphaerales;f__Nitrosopumilaceae;g__TA-20;s__	CRISPR_spacer	c__Nitrososphaeria	g__TA-20	o__Nitrososphaerales
6-2_NODE_236_fragment_1	7-6_bin.13	d__Archaea;p__Thermoproteota;c__Nitrososphaeria;o__Nitrososphaerales;f__Nitrosopumilaceae;g__TA-20;s__	CRISPR_spacer	c__Nitrososphaeria	g__TA-20	o__Nitrososphaerales
7-6_NODE_4335	7-6_bin.13	d__Archaea;p__Thermoproteota;c__Nitrososphaeria;o__Nitrososphaerales;f__Nitrosopumilaceae;g__TA-20;s__	CRISPR_spacer	c__Nitrososphaeria	g__TA-20	o__Nitrososphaerales
5-6_NODE_2198	7-6_bin.13	d__Archaea;p__Thermoproteota;c__Nitrososphaeria;o__Nitrososphaerales;f__Nitrosopumilaceae;g__TA-20;s__	CRISPR_spacer	c__Nitrososphaeria	g__TA-20	o__Nitrososphaerales
7-6_NODE_2109	7-6_bin.13	d__Archaea;p__Thermoproteota;c__Nitrososphaeria;o__Nitrososphaerales;f__Nitrosopumilaceae;g__TA-20;s__	CRISPR_spacer	c__Nitrososphaeria	g__TA-20	o__Nitrososphaerales
4-6_NODE_1339	7-6_bin.13	d__Archaea;p__Thermoproteota;c__Nitrososphaeria;o__Nitrososphaerales;f__Nitrosopumilaceae;g__TA-20;s__	CRISPR_spacer	c__Nitrososphaeria	g__TA-20	o__Nitrososphaerales
5-5_NODE_799	7-6_bin.13	d__Archaea;p__Thermoproteota;c__Nitrososphaeria;o__Nitrososphaerales;f__Nitrosopumilaceae;g__TA-20;s__	CRISPR_spacer	c__Nitrososphaeria	g__TA-20	o__Nitrososphaerales
6-2_NODE_236	7-6_bin.13	d__Archaea;p__Thermoproteota;c__Nitrososphaeria;o__Nitrososphaerales;f__Nitrosopumilaceae;g__TA-20;s__	CRISPR_spacer	c__Nitrososphaeria	g__TA-20	o__Nitrososphaerales
3-26_NODE_53	7-6_bin.13	d__Archaea;p__Thermoproteota;c__Nitrososphaeria;o__Nitrososphaerales;f__Nitrosopumilaceae;g__TA-20;s__	CRISPR_spacer	c__Nitrososphaeria	g__TA-20	o__Nitrososphaerales
2-56_NODE_723	7-6_bin.13	d__Archaea;p__Thermoproteota;c__Nitrososphaeria;o__Nitrososphaerales;f__Nitrosopumilaceae;g__TA-20;s__	CRISPR_spacer	c__Nitrososphaeria	g__TA-20	o__Nitrososphaerales
6-2_NODE_1494	7-6_bin.13	d__Archaea;p__Thermoproteota;c__Nitrososphaeria;o__Nitrososphaerales;f__Nitrosopumilaceae;g__TA-20;s__	CRISPR_spacer	c__Nitrososphaeria	g__TA-20	o__Nitrososphaerales
5-5_NODE_85	7-6_bin.13	d__Archaea;p__Thermoproteota;c__Nitrososphaeria;o__Nitrososphaerales;f__Nitrosopumilaceae;g__TA-20;s__	CRISPR_spacer	c__Nitrososphaeria	g__TA-20	o__Nitrososphaerales
4-7_NODE_1030	7-6_bin.13	d__Archaea;p__Thermoproteota;c__Nitrososphaeria;o__Nitrososphaerales;f__Nitrosopumilaceae;g__TA-20;s__	CRISPR_spacer	c__Nitrososphaeria	g__TA-20	o__Nitrososphaerales
7-1_NODE_1529_fragment_1	8-4_bin.1	d__Bacteria;p__Acidobacteriota;c__Blastocatellia;o__Chloracidobacteriales;f__Chloracidobacteriaceae;g__;s__	CRISPR_spacer	c__Blastocatellia	g__	o__Chloracidobacteriales
1-4_NODE_301	8-4_bin.1	d__Bacteria;p__Acidobacteriota;c__Blastocatellia;o__Chloracidobacteriales;f__Chloracidobacteriaceae;g__;s__	CRISPR_spacer	c__Blastocatellia	g__	o__Chloracidobacteriales
7-1_NODE_1529	8-4_bin.1	d__Bacteria;p__Acidobacteriota;c__Blastocatellia;o__Chloracidobacteriales;f__Chloracidobacteriaceae;g__;s__	CRISPR_spacer	c__Blastocatellia	g__	o__Chloracidobacteriales
1-4_NODE_504	8-4_bin.1	d__Bacteria;p__Acidobacteriota;c__Blastocatellia;o__Chloracidobacteriales;f__Chloracidobacteriaceae;g__;s__	CRISPR_spacer	c__Blastocatellia	g__	o__Chloracidobacteriales
8-5_NODE_239	8-4_bin.1	d__Bacteria;p__Acidobacteriota;c__Blastocatellia;o__Chloracidobacteriales;f__Chloracidobacteriaceae;g__;s__	CRISPR_spacer	c__Blastocatellia	g__	o__Chloracidobacteriales
6-3_NODE_5630	8-4_bin.1	d__Bacteria;p__Acidobacteriota;c__Blastocatellia;o__Chloracidobacteriales;f__Chloracidobacteriaceae;g__;s__	CRISPR_spacer	c__Blastocatellia	g__	o__Chloracidobacteriales
7-1_NODE_796	8-4_bin.1	d__Bacteria;p__Acidobacteriota;c__Blastocatellia;o__Chloracidobacteriales;f__Chloracidobacteriaceae;g__;s__	CRISPR_spacer	c__Blastocatellia	g__	o__Chloracidobacteriales
8-4_NODE_104	8-4_bin.25	d__Bacteria;p__Methylomirabilota;c__Methylomirabilia;o__Rokubacteriales;f__CSP1-6;g__;s__	CRISPR_spacer	c__Methylomirabilia	g__	o__Rokubacteriales
6-3_NODE_74	8-4_bin.25	d__Bacteria;p__Methylomirabilota;c__Methylomirabilia;o__Rokubacteriales;f__CSP1-6;g__;s__	CRISPR_spacer	c__Methylomirabilia	g__	o__Rokubacteriales
2-56_NODE_2339	8-4_bin.25	d__Bacteria;p__Methylomirabilota;c__Methylomirabilia;o__Rokubacteriales;f__CSP1-6;g__;s__	CRISPR_spacer	c__Methylomirabilia	g__	o__Rokubacteriales
7-6_NODE_2074	8-4_bin.25	d__Bacteria;p__Methylomirabilota;c__Methylomirabilia;o__Rokubacteriales;f__CSP1-6;g__;s__	CRISPR_spacer	c__Methylomirabilia	g__	o__Rokubacteriales
4-6_NODE_390	8-4_bin.25	d__Bacteria;p__Methylomirabilota;c__Methylomirabilia;o__Rokubacteriales;f__CSP1-6;g__;s__	CRISPR_spacer	c__Methylomirabilia	g__	o__Rokubacteriales
6-2_NODE_792	8-4_bin.25	d__Bacteria;p__Methylomirabilota;c__Methylomirabilia;o__Rokubacteriales;f__CSP1-6;g__;s__	CRISPR_spacer	c__Methylomirabilia	g__	o__Rokubacteriales
6-4_NODE_682	8-4_bin.25	d__Bacteria;p__Methylomirabilota;c__Methylomirabilia;o__Rokubacteriales;f__CSP1-6;g__;s__	CRISPR_spacer	c__Methylomirabilia	g__	o__Rokubacteriales
5-6_NODE_1252	8-4_bin.25	d__Bacteria;p__Methylomirabilota;c__Methylomirabilia;o__Rokubacteriales;f__CSP1-6;g__;s__	CRISPR_spacer	c__Methylomirabilia	g__	o__Rokubacteriales
7-1_NODE_1659	8-4_bin.25	d__Bacteria;p__Methylomirabilota;c__Methylomirabilia;o__Rokubacteriales;f__CSP1-6;g__;s__	CRISPR_spacer	c__Methylomirabilia	g__	o__Rokubacteriales
8-3_NODE_1732	8-4_bin.25	d__Bacteria;p__Methylomirabilota;c__Methylomirabilia;o__Rokubacteriales;f__CSP1-6;g__;s__	CRISPR_spacer	c__Methylomirabilia	g__	o__Rokubacteriales
8-4_NODE_2393	8-4_bin.25	d__Bacteria;p__Methylomirabilota;c__Methylomirabilia;o__Rokubacteriales;f__CSP1-6;g__;s__	CRISPR_spacer	c__Methylomirabilia	g__	o__Rokubacteriales
7-1_NODE_2753	8-4_bin.25	d__Bacteria;p__Methylomirabilota;c__Methylomirabilia;o__Rokubacteriales;f__CSP1-6;g__;s__	CRISPR_spacer	c__Methylomirabilia	g__	o__Rokubacteriales
6-2_NODE_853	8-4_bin.25	d__Bacteria;p__Methylomirabilota;c__Methylomirabilia;o__Rokubacteriales;f__CSP1-6;g__;s__	CRISPR_spacer	c__Methylomirabilia	g__	o__Rokubacteriales
8-4_NODE_2844	8-4_bin.25	d__Bacteria;p__Methylomirabilota;c__Methylomirabilia;o__Rokubacteriales;f__CSP1-6;g__;s__	CRISPR_spacer	c__Methylomirabilia	g__	o__Rokubacteriales
5-5_NODE_1421	8-4_bin.25	d__Bacteria;p__Methylomirabilota;c__Methylomirabilia;o__Rokubacteriales;f__CSP1-6;g__;s__	CRISPR_spacer	c__Methylomirabilia	g__	o__Rokubacteriales
3-5_NODE_234	8-4_bin.25	d__Bacteria;p__Methylomirabilota;c__Methylomirabilia;o__Rokubacteriales;f__CSP1-6;g__;s__	CRISPR_spacer	c__Methylomirabilia	g__	o__Rokubacteriales
2-56_NODE_1478	8-4_bin.25	d__Bacteria;p__Methylomirabilota;c__Methylomirabilia;o__Rokubacteriales;f__CSP1-6;g__;s__	CRISPR_spacer	c__Methylomirabilia	g__	o__Rokubacteriales
4-6_NODE_629	8-4_bin.25	d__Bacteria;p__Methylomirabilota;c__Methylomirabilia;o__Rokubacteriales;f__CSP1-6;g__;s__	CRISPR_spacer	c__Methylomirabilia	g__	o__Rokubacteriales
5-5_NODE_1997	8-4_bin.25	d__Bacteria;p__Methylomirabilota;c__Methylomirabilia;o__Rokubacteriales;f__CSP1-6;g__;s__	CRISPR_spacer	c__Methylomirabilia	g__	o__Rokubacteriales
8-3_NODE_226	8-4_bin.25	d__Bacteria;p__Methylomirabilota;c__Methylomirabilia;o__Rokubacteriales;f__CSP1-6;g__;s__	CRISPR_spacer	c__Methylomirabilia	g__	o__Rokubacteriales
2-56_NODE_2180	8-4_bin.25	d__Bacteria;p__Methylomirabilota;c__Methylomirabilia;o__Rokubacteriales;f__CSP1-6;g__;s__	CRISPR_spacer	c__Methylomirabilia	g__	o__Rokubacteriales
2-4_NODE_2004	8-4_bin.25	d__Bacteria;p__Methylomirabilota;c__Methylomirabilia;o__Rokubacteriales;f__CSP1-6;g__;s__	CRISPR_spacer	c__Methylomirabilia	g__	o__Rokubacteriales
4-7_NODE_1074	8-4_bin.25	d__Bacteria;p__Methylomirabilota;c__Methylomirabilia;o__Rokubacteriales;f__CSP1-6;g__;s__	CRISPR_spacer	c__Methylomirabilia	g__	o__Rokubacteriales
2-56_NODE_2427	8-4_bin.25	d__Bacteria;p__Methylomirabilota;c__Methylomirabilia;o__Rokubacteriales;f__CSP1-6;g__;s__	CRISPR_spacer	c__Methylomirabilia	g__	o__Rokubacteriales
5-6_NODE_401	8-4_bin.25	d__Bacteria;p__Methylomirabilota;c__Methylomirabilia;o__Rokubacteriales;f__CSP1-6;g__;s__	CRISPR_spacer	c__Methylomirabilia	g__	o__Rokubacteriales
8-5_NODE_32	8-4_bin.25	d__Bacteria;p__Methylomirabilota;c__Methylomirabilia;o__Rokubacteriales;f__CSP1-6;g__;s__	CRISPR_spacer	c__Methylomirabilia	g__	o__Rokubacteriales
2-4_NODE_216	8-4_bin.25	d__Bacteria;p__Methylomirabilota;c__Methylomirabilia;o__Rokubacteriales;f__CSP1-6;g__;s__	CRISPR_spacer	c__Methylomirabilia	g__	o__Rokubacteriales
4-6_NODE_2927	8-4_bin.25	d__Bacteria;p__Methylomirabilota;c__Methylomirabilia;o__Rokubacteriales;f__CSP1-6;g__;s__	CRISPR_spacer	c__Methylomirabilia	g__	o__Rokubacteriales
2-66_NODE_686	8-4_bin.25	d__Bacteria;p__Methylomirabilota;c__Methylomirabilia;o__Rokubacteriales;f__CSP1-6;g__;s__	CRISPR_spacer	c__Methylomirabilia	g__	o__Rokubacteriales
5-5_NODE_448	8-4_bin.25	d__Bacteria;p__Methylomirabilota;c__Methylomirabilia;o__Rokubacteriales;f__CSP1-6;g__;s__	CRISPR_spacer	c__Methylomirabilia	g__	o__Rokubacteriales
7-1_NODE_2299	8-4_bin.25	d__Bacteria;p__Methylomirabilota;c__Methylomirabilia;o__Rokubacteriales;f__CSP1-6;g__;s__	CRISPR_spacer	c__Methylomirabilia	g__	o__Rokubacteriales
5-7_NODE_247	8-4_bin.25	d__Bacteria;p__Methylomirabilota;c__Methylomirabilia;o__Rokubacteriales;f__CSP1-6;g__;s__	CRISPR_spacer	c__Methylomirabilia	g__	o__Rokubacteriales
3-4_NODE_1269	8-4_bin.25	d__Bacteria;p__Methylomirabilota;c__Methylomirabilia;o__Rokubacteriales;f__CSP1-6;g__;s__	CRISPR_spacer	c__Methylomirabilia	g__	o__Rokubacteriales
2-56_NODE_2315	8-4_bin.25	d__Bacteria;p__Methylomirabilota;c__Methylomirabilia;o__Rokubacteriales;f__CSP1-6;g__;s__	CRISPR_spacer	c__Methylomirabilia	g__	o__Rokubacteriales
8-3_NODE_526	8-4_bin.25	d__Bacteria;p__Methylomirabilota;c__Methylomirabilia;o__Rokubacteriales;f__CSP1-6;g__;s__	CRISPR_spacer	c__Methylomirabilia	g__	o__Rokubacteriales
4-6_NODE_1387	8-4_bin.25	d__Bacteria;p__Methylomirabilota;c__Methylomirabilia;o__Rokubacteriales;f__CSP1-6;g__;s__	CRISPR_spacer	c__Methylomirabilia	g__	o__Rokubacteriales
1-4_NODE_86	8-4_bin.25	d__Bacteria;p__Methylomirabilota;c__Methylomirabilia;o__Rokubacteriales;f__CSP1-6;g__;s__	CRISPR_spacer	c__Methylomirabilia	g__	o__Rokubacteriales
4-6_NODE_173	8-4_bin.25	d__Bacteria;p__Methylomirabilota;c__Methylomirabilia;o__Rokubacteriales;f__CSP1-6;g__;s__	CRISPR_spacer	c__Methylomirabilia	g__	o__Rokubacteriales
6-4_NODE_1680	8-4_bin.25	d__Bacteria;p__Methylomirabilota;c__Methylomirabilia;o__Rokubacteriales;f__CSP1-6;g__;s__	CRISPR_spacer	c__Methylomirabilia	g__	o__Rokubacteriales
5-5_NODE_338	8-4_bin.25	d__Bacteria;p__Methylomirabilota;c__Methylomirabilia;o__Rokubacteriales;f__CSP1-6;g__;s__	CRISPR_spacer	c__Methylomirabilia	g__	o__Rokubacteriales
5-5_NODE_25	8-4_bin.25	d__Bacteria;p__Methylomirabilota;c__Methylomirabilia;o__Rokubacteriales;f__CSP1-6;g__;s__	CRISPR_spacer	c__Methylomirabilia	g__	o__Rokubacteriales
2-66_NODE_348	8-4_bin.25	d__Bacteria;p__Methylomirabilota;c__Methylomirabilia;o__Rokubacteriales;f__CSP1-6;g__;s__	CRISPR_spacer	c__Methylomirabilia	g__	o__Rokubacteriales
8-4_NODE_1305	8-4_bin.25	d__Bacteria;p__Methylomirabilota;c__Methylomirabilia;o__Rokubacteriales;f__CSP1-6;g__;s__	CRISPR_spacer	c__Methylomirabilia	g__	o__Rokubacteriales
2-56_NODE_370	8-4_bin.25	d__Bacteria;p__Methylomirabilota;c__Methylomirabilia;o__Rokubacteriales;f__CSP1-6;g__;s__	CRISPR_spacer	c__Methylomirabilia	g__	o__Rokubacteriales
4-7_NODE_1894	8-4_bin.25	d__Bacteria;p__Methylomirabilota;c__Methylomirabilia;o__Rokubacteriales;f__CSP1-6;g__;s__	CRISPR_spacer	c__Methylomirabilia	g__	o__Rokubacteriales
3-5_NODE_1151	8-4_bin.25	d__Bacteria;p__Methylomirabilota;c__Methylomirabilia;o__Rokubacteriales;f__CSP1-6;g__;s__	CRISPR_spacer	c__Methylomirabilia	g__	o__Rokubacteriales
8-4_NODE_655	8-4_bin.25	d__Bacteria;p__Methylomirabilota;c__Methylomirabilia;o__Rokubacteriales;f__CSP1-6;g__;s__	CRISPR_spacer	c__Methylomirabilia	g__	o__Rokubacteriales
1-4_NODE_17	8-4_bin.25	d__Bacteria;p__Methylomirabilota;c__Methylomirabilia;o__Rokubacteriales;f__CSP1-6;g__;s__	CRISPR_spacer	c__Methylomirabilia	g__	o__Rokubacteriales
4-2_NODE_2624	8-4_bin.25	d__Bacteria;p__Methylomirabilota;c__Methylomirabilia;o__Rokubacteriales;f__CSP1-6;g__;s__	CRISPR_spacer	c__Methylomirabilia	g__	o__Rokubacteriales
7-1_NODE_2592	8-4_bin.25	d__Bacteria;p__Methylomirabilota;c__Methylomirabilia;o__Rokubacteriales;f__CSP1-6;g__;s__	CRISPR_spacer	c__Methylomirabilia	g__	o__Rokubacteriales
8-3_NODE_2136	8-4_bin.25	d__Bacteria;p__Methylomirabilota;c__Methylomirabilia;o__Rokubacteriales;f__CSP1-6;g__;s__	CRISPR_spacer	c__Methylomirabilia	g__	o__Rokubacteriales
6-3_NODE_70	8-4_bin.25	d__Bacteria;p__Methylomirabilota;c__Methylomirabilia;o__Rokubacteriales;f__CSP1-6;g__;s__	CRISPR_spacer	c__Methylomirabilia	g__	o__Rokubacteriales
2-66_NODE_1307	8-4_bin.25	d__Bacteria;p__Methylomirabilota;c__Methylomirabilia;o__Rokubacteriales;f__CSP1-6;g__;s__	CRISPR_spacer	c__Methylomirabilia	g__	o__Rokubacteriales
5-7_NODE_1259	8-4_bin.25	d__Bacteria;p__Methylomirabilota;c__Methylomirabilia;o__Rokubacteriales;f__CSP1-6;g__;s__	CRISPR_spacer	c__Methylomirabilia	g__	o__Rokubacteriales
2-4_NODE_936	8-4_bin.25	d__Bacteria;p__Methylomirabilota;c__Methylomirabilia;o__Rokubacteriales;f__CSP1-6;g__;s__	CRISPR_spacer	c__Methylomirabilia	g__	o__Rokubacteriales
6-4_NODE_1234	8-4_bin.25	d__Bacteria;p__Methylomirabilota;c__Methylomirabilia;o__Rokubacteriales;f__CSP1-6;g__;s__	CRISPR_spacer	c__Methylomirabilia	g__	o__Rokubacteriales
5-6_NODE_1190	8-4_bin.25	d__Bacteria;p__Methylomirabilota;c__Methylomirabilia;o__Rokubacteriales;f__CSP1-6;g__;s__	CRISPR_spacer	c__Methylomirabilia	g__	o__Rokubacteriales
7-1_NODE_1681	8-4_bin.25	d__Bacteria;p__Methylomirabilota;c__Methylomirabilia;o__Rokubacteriales;f__CSP1-6;g__;s__	CRISPR_spacer	c__Methylomirabilia	g__	o__Rokubacteriales
6-2_NODE_361	8-4_bin.25	d__Bacteria;p__Methylomirabilota;c__Methylomirabilia;o__Rokubacteriales;f__CSP1-6;g__;s__	CRISPR_spacer	c__Methylomirabilia	g__	o__Rokubacteriales
2-66_NODE_279	8-4_bin.25	d__Bacteria;p__Methylomirabilota;c__Methylomirabilia;o__Rokubacteriales;f__CSP1-6;g__;s__	CRISPR_spacer	c__Methylomirabilia	g__	o__Rokubacteriales
4-7_NODE_318	8-4_bin.25	d__Bacteria;p__Methylomirabilota;c__Methylomirabilia;o__Rokubacteriales;f__CSP1-6;g__;s__	CRISPR_spacer	c__Methylomirabilia	g__	o__Rokubacteriales
6-2_NODE_2128	8-4_bin.25	d__Bacteria;p__Methylomirabilota;c__Methylomirabilia;o__Rokubacteriales;f__CSP1-6;g__;s__	CRISPR_spacer	c__Methylomirabilia	g__	o__Rokubacteriales
8-3_NODE_3808	8-4_bin.25	d__Bacteria;p__Methylomirabilota;c__Methylomirabilia;o__Rokubacteriales;f__CSP1-6;g__;s__	CRISPR_spacer	c__Methylomirabilia	g__	o__Rokubacteriales
7-1_NODE_2840	8-4_bin.25	d__Bacteria;p__Methylomirabilota;c__Methylomirabilia;o__Rokubacteriales;f__CSP1-6;g__;s__	CRISPR_spacer	c__Methylomirabilia	g__	o__Rokubacteriales
3-26_NODE_172	8-4_bin.25	d__Bacteria;p__Methylomirabilota;c__Methylomirabilia;o__Rokubacteriales;f__CSP1-6;g__;s__	CRISPR_spacer	c__Methylomirabilia	g__	o__Rokubacteriales
4-6_NODE_28	8-4_bin.25	d__Bacteria;p__Methylomirabilota;c__Methylomirabilia;o__Rokubacteriales;f__CSP1-6;g__;s__	CRISPR_spacer	c__Methylomirabilia	g__	o__Rokubacteriales
6-3_NODE_3128	8-4_bin.25	d__Bacteria;p__Methylomirabilota;c__Methylomirabilia;o__Rokubacteriales;f__CSP1-6;g__;s__	CRISPR_spacer	c__Methylomirabilia	g__	o__Rokubacteriales
8-4_NODE_2457	8-4_bin.25	d__Bacteria;p__Methylomirabilota;c__Methylomirabilia;o__Rokubacteriales;f__CSP1-6;g__;s__	CRISPR_spacer	c__Methylomirabilia	g__	o__Rokubacteriales
1-1_NODE_4641	8-4_bin.25	d__Bacteria;p__Methylomirabilota;c__Methylomirabilia;o__Rokubacteriales;f__CSP1-6;g__;s__	CRISPR_spacer	c__Methylomirabilia	g__	o__Rokubacteriales
8-4_NODE_976	8-4_bin.25	d__Bacteria;p__Methylomirabilota;c__Methylomirabilia;o__Rokubacteriales;f__CSP1-6;g__;s__	CRISPR_spacer	c__Methylomirabilia	g__	o__Rokubacteriales
6-2_NODE_1258	8-4_bin.25	d__Bacteria;p__Methylomirabilota;c__Methylomirabilia;o__Rokubacteriales;f__CSP1-6;g__;s__	CRISPR_spacer	c__Methylomirabilia	g__	o__Rokubacteriales
7-2_NODE_226	8-4_bin.25	d__Bacteria;p__Methylomirabilota;c__Methylomirabilia;o__Rokubacteriales;f__CSP1-6;g__;s__	CRISPR_spacer	c__Methylomirabilia	g__	o__Rokubacteriales
7-1_NODE_541	8-4_bin.25	d__Bacteria;p__Methylomirabilota;c__Methylomirabilia;o__Rokubacteriales;f__CSP1-6;g__;s__	CRISPR_spacer	c__Methylomirabilia	g__	o__Rokubacteriales
5-5_NODE_2759	8-4_bin.25	d__Bacteria;p__Methylomirabilota;c__Methylomirabilia;o__Rokubacteriales;f__CSP1-6;g__;s__	CRISPR_spacer	c__Methylomirabilia	g__	o__Rokubacteriales
4-2_NODE_1853	8-4_bin.25	d__Bacteria;p__Methylomirabilota;c__Methylomirabilia;o__Rokubacteriales;f__CSP1-6;g__;s__	CRISPR_spacer	c__Methylomirabilia	g__	o__Rokubacteriales
4-6_NODE_329	8-4_bin.25	d__Bacteria;p__Methylomirabilota;c__Methylomirabilia;o__Rokubacteriales;f__CSP1-6;g__;s__	CRISPR_spacer	c__Methylomirabilia	g__	o__Rokubacteriales
6-4_NODE_4767	8-4_bin.25	d__Bacteria;p__Methylomirabilota;c__Methylomirabilia;o__Rokubacteriales;f__CSP1-6;g__;s__	CRISPR_spacer	c__Methylomirabilia	g__	o__Rokubacteriales
4-2_NODE_1624	8-4_bin.25	d__Bacteria;p__Methylomirabilota;c__Methylomirabilia;o__Rokubacteriales;f__CSP1-6;g__;s__	CRISPR_spacer	c__Methylomirabilia	g__	o__Rokubacteriales
3-5_NODE_321	8-4_bin.25	d__Bacteria;p__Methylomirabilota;c__Methylomirabilia;o__Rokubacteriales;f__CSP1-6;g__;s__	CRISPR_spacer	c__Methylomirabilia	g__	o__Rokubacteriales
7-2_NODE_638	8-4_bin.25	d__Bacteria;p__Methylomirabilota;c__Methylomirabilia;o__Rokubacteriales;f__CSP1-6;g__;s__	CRISPR_spacer	c__Methylomirabilia	g__	o__Rokubacteriales
6-2_NODE_732	8-4_bin.25	d__Bacteria;p__Methylomirabilota;c__Methylomirabilia;o__Rokubacteriales;f__CSP1-6;g__;s__	CRISPR_spacer	c__Methylomirabilia	g__	o__Rokubacteriales
3-5_NODE_1141	8-4_bin.25	d__Bacteria;p__Methylomirabilota;c__Methylomirabilia;o__Rokubacteriales;f__CSP1-6;g__;s__	CRISPR_spacer	c__Methylomirabilia	g__	o__Rokubacteriales
6-4_NODE_80	8-4_bin.25	d__Bacteria;p__Methylomirabilota;c__Methylomirabilia;o__Rokubacteriales;f__CSP1-6;g__;s__	CRISPR_spacer	c__Methylomirabilia	g__	o__Rokubacteriales
6-3_NODE_273	8-4_bin.25	d__Bacteria;p__Methylomirabilota;c__Methylomirabilia;o__Rokubacteriales;f__CSP1-6;g__;s__	CRISPR_spacer	c__Methylomirabilia	g__	o__Rokubacteriales
2-4_NODE_20	8-4_bin.25	d__Bacteria;p__Methylomirabilota;c__Methylomirabilia;o__Rokubacteriales;f__CSP1-6;g__;s__	CRISPR_spacer	c__Methylomirabilia	g__	o__Rokubacteriales
6-2_NODE_2104	8-4_bin.25	d__Bacteria;p__Methylomirabilota;c__Methylomirabilia;o__Rokubacteriales;f__CSP1-6;g__;s__	CRISPR_spacer	c__Methylomirabilia	g__	o__Rokubacteriales
6-2_NODE_45	8-4_bin.25	d__Bacteria;p__Methylomirabilota;c__Methylomirabilia;o__Rokubacteriales;f__CSP1-6;g__;s__	CRISPR_spacer	c__Methylomirabilia	g__	o__Rokubacteriales
6-2_NODE_957	8-4_bin.25	d__Bacteria;p__Methylomirabilota;c__Methylomirabilia;o__Rokubacteriales;f__CSP1-6;g__;s__	CRISPR_spacer	c__Methylomirabilia	g__	o__Rokubacteriales
8-4_NODE_3487	8-4_bin.25	d__Bacteria;p__Methylomirabilota;c__Methylomirabilia;o__Rokubacteriales;f__CSP1-6;g__;s__	CRISPR_spacer	c__Methylomirabilia	g__	o__Rokubacteriales
5-7_NODE_6095	8-4_bin.25	d__Bacteria;p__Methylomirabilota;c__Methylomirabilia;o__Rokubacteriales;f__CSP1-6;g__;s__	CRISPR_spacer	c__Methylomirabilia	g__	o__Rokubacteriales
6-3_NODE_267_1	8-4_bin.25	d__Bacteria;p__Methylomirabilota;c__Methylomirabilia;o__Rokubacteriales;f__CSP1-6;g__;s__	CRISPR_spacer	c__Methylomirabilia	g__	o__Rokubacteriales
6-2_NODE_273	8-4_bin.25	d__Bacteria;p__Methylomirabilota;c__Methylomirabilia;o__Rokubacteriales;f__CSP1-6;g__;s__	CRISPR_spacer	c__Methylomirabilia	g__	o__Rokubacteriales
7-1_NODE_433	8-4_bin.25	d__Bacteria;p__Methylomirabilota;c__Methylomirabilia;o__Rokubacteriales;f__CSP1-6;g__;s__	CRISPR_spacer	c__Methylomirabilia	g__	o__Rokubacteriales
4-7_NODE_397	8-4_bin.25	d__Bacteria;p__Methylomirabilota;c__Methylomirabilia;o__Rokubacteriales;f__CSP1-6;g__;s__	CRISPR_spacer	c__Methylomirabilia	g__	o__Rokubacteriales
4-7_NODE_4	8-4_bin.25	d__Bacteria;p__Methylomirabilota;c__Methylomirabilia;o__Rokubacteriales;f__CSP1-6;g__;s__	CRISPR_spacer	c__Methylomirabilia	g__	o__Rokubacteriales
8-4_NODE_2394	8-4_bin.25	d__Bacteria;p__Methylomirabilota;c__Methylomirabilia;o__Rokubacteriales;f__CSP1-6;g__;s__	CRISPR_spacer	c__Methylomirabilia	g__	o__Rokubacteriales
4-6_NODE_47	8-4_bin.25	d__Bacteria;p__Methylomirabilota;c__Methylomirabilia;o__Rokubacteriales;f__CSP1-6;g__;s__	CRISPR_spacer	c__Methylomirabilia	g__	o__Rokubacteriales
5-6_NODE_144	8-4_bin.25	d__Bacteria;p__Methylomirabilota;c__Methylomirabilia;o__Rokubacteriales;f__CSP1-6;g__;s__	CRISPR_spacer	c__Methylomirabilia	g__	o__Rokubacteriales
7-2_NODE_680	8-4_bin.25	d__Bacteria;p__Methylomirabilota;c__Methylomirabilia;o__Rokubacteriales;f__CSP1-6;g__;s__	CRISPR_spacer	c__Methylomirabilia	g__	o__Rokubacteriales
2-4_NODE_1149	8-4_bin.25	d__Bacteria;p__Methylomirabilota;c__Methylomirabilia;o__Rokubacteriales;f__CSP1-6;g__;s__	CRISPR_spacer	c__Methylomirabilia	g__	o__Rokubacteriales
3-4_NODE_1133	8-4_bin.25	d__Bacteria;p__Methylomirabilota;c__Methylomirabilia;o__Rokubacteriales;f__CSP1-6;g__;s__	CRISPR_spacer	c__Methylomirabilia	g__	o__Rokubacteriales
4-6_NODE_1931	8-4_bin.25	d__Bacteria;p__Methylomirabilota;c__Methylomirabilia;o__Rokubacteriales;f__CSP1-6;g__;s__	CRISPR_spacer	c__Methylomirabilia	g__	o__Rokubacteriales
4-6_NODE_1704	8-4_bin.25	d__Bacteria;p__Methylomirabilota;c__Methylomirabilia;o__Rokubacteriales;f__CSP1-6;g__;s__	CRISPR_spacer	c__Methylomirabilia	g__	o__Rokubacteriales
7-6_NODE_4841	8-4_bin.25	d__Bacteria;p__Methylomirabilota;c__Methylomirabilia;o__Rokubacteriales;f__CSP1-6;g__;s__	CRISPR_spacer	c__Methylomirabilia	g__	o__Rokubacteriales
5-5_NODE_2128	8-4_bin.25	d__Bacteria;p__Methylomirabilota;c__Methylomirabilia;o__Rokubacteriales;f__CSP1-6;g__;s__	CRISPR_spacer	c__Methylomirabilia	g__	o__Rokubacteriales
7-6_NODE_4140	8-4_bin.25	d__Bacteria;p__Methylomirabilota;c__Methylomirabilia;o__Rokubacteriales;f__CSP1-6;g__;s__	CRISPR_spacer	c__Methylomirabilia	g__	o__Rokubacteriales
5-6_NODE_1865	8-4_bin.25	d__Bacteria;p__Methylomirabilota;c__Methylomirabilia;o__Rokubacteriales;f__CSP1-6;g__;s__	CRISPR_spacer	c__Methylomirabilia	g__	o__Rokubacteriales
8-5_NODE_480	8-4_bin.25	d__Bacteria;p__Methylomirabilota;c__Methylomirabilia;o__Rokubacteriales;f__CSP1-6;g__;s__	CRISPR_spacer	c__Methylomirabilia	g__	o__Rokubacteriales
2-4_NODE_724	8-4_bin.25	d__Bacteria;p__Methylomirabilota;c__Methylomirabilia;o__Rokubacteriales;f__CSP1-6;g__;s__	CRISPR_spacer	c__Methylomirabilia	g__	o__Rokubacteriales
7-1_NODE_2303	8-4_bin.25	d__Bacteria;p__Methylomirabilota;c__Methylomirabilia;o__Rokubacteriales;f__CSP1-6;g__;s__	CRISPR_spacer	c__Methylomirabilia	g__	o__Rokubacteriales
6-3_NODE_431	8-4_bin.25	d__Bacteria;p__Methylomirabilota;c__Methylomirabilia;o__Rokubacteriales;f__CSP1-6;g__;s__	CRISPR_spacer	c__Methylomirabilia	g__	o__Rokubacteriales
6-2_NODE_478	8-4_bin.25	d__Bacteria;p__Methylomirabilota;c__Methylomirabilia;o__Rokubacteriales;f__CSP1-6;g__;s__	CRISPR_spacer	c__Methylomirabilia	g__	o__Rokubacteriales
4-2_NODE_2222	8-4_bin.25	d__Bacteria;p__Methylomirabilota;c__Methylomirabilia;o__Rokubacteriales;f__CSP1-6;g__;s__	CRISPR_spacer	c__Methylomirabilia	g__	o__Rokubacteriales
5-5_NODE_4888	8-4_bin.25	d__Bacteria;p__Methylomirabilota;c__Methylomirabilia;o__Rokubacteriales;f__CSP1-6;g__;s__	CRISPR_spacer	c__Methylomirabilia	g__	o__Rokubacteriales
4-2_NODE_3890	8-4_bin.25	d__Bacteria;p__Methylomirabilota;c__Methylomirabilia;o__Rokubacteriales;f__CSP1-6;g__;s__	CRISPR_spacer	c__Methylomirabilia	g__	o__Rokubacteriales
8-4_NODE_2371	8-4_bin.25	d__Bacteria;p__Methylomirabilota;c__Methylomirabilia;o__Rokubacteriales;f__CSP1-6;g__;s__	CRISPR_spacer	c__Methylomirabilia	g__	o__Rokubacteriales
2-56_NODE_313	8-5_bin.8	d__Bacteria;p__Acidobacteriota;c__Blastocatellia;o__Pyrinomonadales;f__Pyrinomonadaceae;g__UBA11740;s__	CRISPR_spacer	c__Blastocatellia	g__UBA11740	o__Pyrinomonadales
2-56_NODE_2	8-5_bin.8	d__Bacteria;p__Acidobacteriota;c__Blastocatellia;o__Pyrinomonadales;f__Pyrinomonadaceae;g__UBA11740;s__	CRISPR_spacer	c__Blastocatellia	g__UBA11740	o__Pyrinomonadales
6-4_NODE_5614	8-5_bin.8	d__Bacteria;p__Acidobacteriota;c__Blastocatellia;o__Pyrinomonadales;f__Pyrinomonadaceae;g__UBA11740;s__	CRISPR_spacer	c__Blastocatellia	g__UBA11740	o__Pyrinomonadales
2-4_NODE_955	8-5_bin.8	d__Bacteria;p__Acidobacteriota;c__Blastocatellia;o__Pyrinomonadales;f__Pyrinomonadaceae;g__UBA11740;s__	CRISPR_spacer	c__Blastocatellia	g__UBA11740	o__Pyrinomonadales
5-6_NODE_426	8-5_bin.8	d__Bacteria;p__Acidobacteriota;c__Blastocatellia;o__Pyrinomonadales;f__Pyrinomonadaceae;g__UBA11740;s__	CRISPR_spacer	c__Blastocatellia	g__UBA11740	o__Pyrinomonadales
3-5_NODE_1030_1	8-5_bin.8	d__Bacteria;p__Acidobacteriota;c__Blastocatellia;o__Pyrinomonadales;f__Pyrinomonadaceae;g__UBA11740;s__	CRISPR_spacer	c__Blastocatellia	g__UBA11740	o__Pyrinomonadales
7-1_NODE_4279	8-5_bin.8	d__Bacteria;p__Acidobacteriota;c__Blastocatellia;o__Pyrinomonadales;f__Pyrinomonadaceae;g__UBA11740;s__	CRISPR_spacer	c__Blastocatellia	g__UBA11740	o__Pyrinomonadales
6-4_NODE_401	8-5_bin.8	d__Bacteria;p__Acidobacteriota;c__Blastocatellia;o__Pyrinomonadales;f__Pyrinomonadaceae;g__UBA11740;s__	CRISPR_spacer	c__Blastocatellia	g__UBA11740	o__Pyrinomonadales
2-4_NODE_213	8-5_bin.8	d__Bacteria;p__Acidobacteriota;c__Blastocatellia;o__Pyrinomonadales;f__Pyrinomonadaceae;g__UBA11740;s__	CRISPR_spacer	c__Blastocatellia	g__UBA11740	o__Pyrinomonadales
5-6_NODE_3196	8-5_bin.8	d__Bacteria;p__Acidobacteriota;c__Blastocatellia;o__Pyrinomonadales;f__Pyrinomonadaceae;g__UBA11740;s__	CRISPR_spacer	c__Blastocatellia	g__UBA11740	o__Pyrinomonadales
5-5_NODE_676	8-5_bin.8	d__Bacteria;p__Acidobacteriota;c__Blastocatellia;o__Pyrinomonadales;f__Pyrinomonadaceae;g__UBA11740;s__	CRISPR_spacer	c__Blastocatellia	g__UBA11740	o__Pyrinomonadales
3-4_NODE_696	8-5_bin.8	d__Bacteria;p__Acidobacteriota;c__Blastocatellia;o__Pyrinomonadales;f__Pyrinomonadaceae;g__UBA11740;s__	CRISPR_spacer	c__Blastocatellia	g__UBA11740	o__Pyrinomonadales
5-6_NODE_1827	8-5_bin.8	d__Bacteria;p__Acidobacteriota;c__Blastocatellia;o__Pyrinomonadales;f__Pyrinomonadaceae;g__UBA11740;s__	CRISPR_spacer	c__Blastocatellia	g__UBA11740	o__Pyrinomonadales
7-1_NODE_4319	8-5_bin.8	d__Bacteria;p__Acidobacteriota;c__Blastocatellia;o__Pyrinomonadales;f__Pyrinomonadaceae;g__UBA11740;s__	CRISPR_spacer	c__Blastocatellia	g__UBA11740	o__Pyrinomonadales
1-4_NODE_77	8-5_bin.8	d__Bacteria;p__Acidobacteriota;c__Blastocatellia;o__Pyrinomonadales;f__Pyrinomonadaceae;g__UBA11740;s__	CRISPR_spacer	c__Blastocatellia	g__UBA11740	o__Pyrinomonadales
5-6_NODE_311	8-5_bin.8	d__Bacteria;p__Acidobacteriota;c__Blastocatellia;o__Pyrinomonadales;f__Pyrinomonadaceae;g__UBA11740;s__	CRISPR_spacer	c__Blastocatellia	g__UBA11740	o__Pyrinomonadales
5-6_NODE_1061	8-5_bin.8	d__Bacteria;p__Acidobacteriota;c__Blastocatellia;o__Pyrinomonadales;f__Pyrinomonadaceae;g__UBA11740;s__	CRISPR_spacer	c__Blastocatellia	g__UBA11740	o__Pyrinomonadales
4-6_NODE_296	8-5_bin.8	d__Bacteria;p__Acidobacteriota;c__Blastocatellia;o__Pyrinomonadales;f__Pyrinomonadaceae;g__UBA11740;s__	CRISPR_spacer	c__Blastocatellia	g__UBA11740	o__Pyrinomonadales
3-5_NODE_1067	8-5_bin.8	d__Bacteria;p__Acidobacteriota;c__Blastocatellia;o__Pyrinomonadales;f__Pyrinomonadaceae;g__UBA11740;s__	CRISPR_spacer	c__Blastocatellia	g__UBA11740	o__Pyrinomonadales
2-56_NODE_318	8-5_bin.8	d__Bacteria;p__Acidobacteriota;c__Blastocatellia;o__Pyrinomonadales;f__Pyrinomonadaceae;g__UBA11740;s__	CRISPR_spacer	c__Blastocatellia	g__UBA11740	o__Pyrinomonadales
6-4_NODE_5893	8-5_bin.8	d__Bacteria;p__Acidobacteriota;c__Blastocatellia;o__Pyrinomonadales;f__Pyrinomonadaceae;g__UBA11740;s__	CRISPR_spacer	c__Blastocatellia	g__UBA11740	o__Pyrinomonadales
4-6_NODE_872	8-5_bin.8	d__Bacteria;p__Acidobacteriota;c__Blastocatellia;o__Pyrinomonadales;f__Pyrinomonadaceae;g__UBA11740;s__	CRISPR_spacer	c__Blastocatellia	g__UBA11740	o__Pyrinomonadales
5-5_NODE_2320	8-5_bin.8	d__Bacteria;p__Acidobacteriota;c__Blastocatellia;o__Pyrinomonadales;f__Pyrinomonadaceae;g__UBA11740;s__	CRISPR_spacer	c__Blastocatellia	g__UBA11740	o__Pyrinomonadales
7-1_NODE_1092	8-5_bin.8	d__Bacteria;p__Acidobacteriota;c__Blastocatellia;o__Pyrinomonadales;f__Pyrinomonadaceae;g__UBA11740;s__	CRISPR_spacer	c__Blastocatellia	g__UBA11740	o__Pyrinomonadales
5-7_NODE_2685	8-5_bin.8	d__Bacteria;p__Acidobacteriota;c__Blastocatellia;o__Pyrinomonadales;f__Pyrinomonadaceae;g__UBA11740;s__	CRISPR_spacer	c__Blastocatellia	g__UBA11740	o__Pyrinomonadales
2-56_NODE_1440	8-5_bin.8	d__Bacteria;p__Acidobacteriota;c__Blastocatellia;o__Pyrinomonadales;f__Pyrinomonadaceae;g__UBA11740;s__	CRISPR_spacer	c__Blastocatellia	g__UBA11740	o__Pyrinomonadales
3-4_NODE_301	8-5_bin.8	d__Bacteria;p__Acidobacteriota;c__Blastocatellia;o__Pyrinomonadales;f__Pyrinomonadaceae;g__UBA11740;s__	CRISPR_spacer	c__Blastocatellia	g__UBA11740	o__Pyrinomonadales
2-56_NODE_1621	8-5_bin.8	d__Bacteria;p__Acidobacteriota;c__Blastocatellia;o__Pyrinomonadales;f__Pyrinomonadaceae;g__UBA11740;s__	CRISPR_spacer	c__Blastocatellia	g__UBA11740	o__Pyrinomonadales
5-6_NODE_65	8-5_bin.8	d__Bacteria;p__Acidobacteriota;c__Blastocatellia;o__Pyrinomonadales;f__Pyrinomonadaceae;g__UBA11740;s__	CRISPR_spacer	c__Blastocatellia	g__UBA11740	o__Pyrinomonadales
7-1_NODE_1225	8-5_bin.8	d__Bacteria;p__Acidobacteriota;c__Blastocatellia;o__Pyrinomonadales;f__Pyrinomonadaceae;g__UBA11740;s__	CRISPR_spacer	c__Blastocatellia	g__UBA11740	o__Pyrinomonadales
7-1_NODE_4413	8-5_bin.8	d__Bacteria;p__Acidobacteriota;c__Blastocatellia;o__Pyrinomonadales;f__Pyrinomonadaceae;g__UBA11740;s__	CRISPR_spacer	c__Blastocatellia	g__UBA11740	o__Pyrinomonadales
4-2_NODE_992	8-5_bin.8	d__Bacteria;p__Acidobacteriota;c__Blastocatellia;o__Pyrinomonadales;f__Pyrinomonadaceae;g__UBA11740;s__	CRISPR_spacer	c__Blastocatellia	g__UBA11740	o__Pyrinomonadales
7-6_NODE_156	8-5_bin.8	d__Bacteria;p__Acidobacteriota;c__Blastocatellia;o__Pyrinomonadales;f__Pyrinomonadaceae;g__UBA11740;s__	CRISPR_spacer	c__Blastocatellia	g__UBA11740	o__Pyrinomonadales
4-6_NODE_1704	8-5_bin.8	d__Bacteria;p__Acidobacteriota;c__Blastocatellia;o__Pyrinomonadales;f__Pyrinomonadaceae;g__UBA11740;s__	CRISPR_spacer	c__Blastocatellia	g__UBA11740	o__Pyrinomonadales
6-3_NODE_2320	8-5_bin.8	d__Bacteria;p__Acidobacteriota;c__Blastocatellia;o__Pyrinomonadales;f__Pyrinomonadaceae;g__UBA11740;s__	CRISPR_spacer	c__Blastocatellia	g__UBA11740	o__Pyrinomonadales
7-1_NODE_2232	8-5_bin.8	d__Bacteria;p__Acidobacteriota;c__Blastocatellia;o__Pyrinomonadales;f__Pyrinomonadaceae;g__UBA11740;s__	CRISPR_spacer	c__Blastocatellia	g__UBA11740	o__Pyrinomonadales
8-4_NODE_1865	8-5_bin.8	d__Bacteria;p__Acidobacteriota;c__Blastocatellia;o__Pyrinomonadales;f__Pyrinomonadaceae;g__UBA11740;s__	CRISPR_spacer	c__Blastocatellia	g__UBA11740	o__Pyrinomonadales
3-4_NODE_1783	8-5_bin.8	d__Bacteria;p__Acidobacteriota;c__Blastocatellia;o__Pyrinomonadales;f__Pyrinomonadaceae;g__UBA11740;s__	CRISPR_spacer	c__Blastocatellia	g__UBA11740	o__Pyrinomonadales
3-5_NODE_1276	8-5_bin.8	d__Bacteria;p__Acidobacteriota;c__Blastocatellia;o__Pyrinomonadales;f__Pyrinomonadaceae;g__UBA11740;s__	CRISPR_spacer	c__Blastocatellia	g__UBA11740	o__Pyrinomonadales
7-6_NODE_304	8-5_bin.8	d__Bacteria;p__Acidobacteriota;c__Blastocatellia;o__Pyrinomonadales;f__Pyrinomonadaceae;g__UBA11740;s__	CRISPR_spacer	c__Blastocatellia	g__UBA11740	o__Pyrinomonadales
8-3_NODE_452	8-5_bin.8	d__Bacteria;p__Acidobacteriota;c__Blastocatellia;o__Pyrinomonadales;f__Pyrinomonadaceae;g__UBA11740;s__	CRISPR_spacer	c__Blastocatellia	g__UBA11740	o__Pyrinomonadales
5-6_NODE_518	8-5_bin.8	d__Bacteria;p__Acidobacteriota;c__Blastocatellia;o__Pyrinomonadales;f__Pyrinomonadaceae;g__UBA11740;s__	CRISPR_spacer	c__Blastocatellia	g__UBA11740	o__Pyrinomonadales
2-4_NODE_444	8-5_bin.8	d__Bacteria;p__Acidobacteriota;c__Blastocatellia;o__Pyrinomonadales;f__Pyrinomonadaceae;g__UBA11740;s__	CRISPR_spacer	c__Blastocatellia	g__UBA11740	o__Pyrinomonadales
8-3_NODE_577	8-5_bin.8	d__Bacteria;p__Acidobacteriota;c__Blastocatellia;o__Pyrinomonadales;f__Pyrinomonadaceae;g__UBA11740;s__	CRISPR_spacer	c__Blastocatellia	g__UBA11740	o__Pyrinomonadales
6-3_NODE_1406_1	8-5_bin.8	d__Bacteria;p__Acidobacteriota;c__Blastocatellia;o__Pyrinomonadales;f__Pyrinomonadaceae;g__UBA11740;s__	CRISPR_spacer	c__Blastocatellia	g__UBA11740	o__Pyrinomonadales
3-26_NODE_673	8-5_bin.8	d__Bacteria;p__Acidobacteriota;c__Blastocatellia;o__Pyrinomonadales;f__Pyrinomonadaceae;g__UBA11740;s__	CRISPR_spacer	c__Blastocatellia	g__UBA11740	o__Pyrinomonadales
7-2_NODE_381	8-5_bin.8	d__Bacteria;p__Acidobacteriota;c__Blastocatellia;o__Pyrinomonadales;f__Pyrinomonadaceae;g__UBA11740;s__	CRISPR_spacer	c__Blastocatellia	g__UBA11740	o__Pyrinomonadales
2-4_NODE_2227	8-5_bin.8	d__Bacteria;p__Acidobacteriota;c__Blastocatellia;o__Pyrinomonadales;f__Pyrinomonadaceae;g__UBA11740;s__	CRISPR_spacer	c__Blastocatellia	g__UBA11740	o__Pyrinomonadales
4-7_NODE_136	8-5_bin.8	d__Bacteria;p__Acidobacteriota;c__Blastocatellia;o__Pyrinomonadales;f__Pyrinomonadaceae;g__UBA11740;s__	CRISPR_spacer	c__Blastocatellia	g__UBA11740	o__Pyrinomonadales
8-3_NODE_1008	8-5_bin.8	d__Bacteria;p__Acidobacteriota;c__Blastocatellia;o__Pyrinomonadales;f__Pyrinomonadaceae;g__UBA11740;s__	CRISPR_spacer	c__Blastocatellia	g__UBA11740	o__Pyrinomonadales
8-3_NODE_1325	8-5_bin.8	d__Bacteria;p__Acidobacteriota;c__Blastocatellia;o__Pyrinomonadales;f__Pyrinomonadaceae;g__UBA11740;s__	CRISPR_spacer	c__Blastocatellia	g__UBA11740	o__Pyrinomonadales
7-2_NODE_260	8-5_bin.8	d__Bacteria;p__Acidobacteriota;c__Blastocatellia;o__Pyrinomonadales;f__Pyrinomonadaceae;g__UBA11740;s__	CRISPR_spacer	c__Blastocatellia	g__UBA11740	o__Pyrinomonadales
5-5_NODE_712	8-5_bin.8	d__Bacteria;p__Acidobacteriota;c__Blastocatellia;o__Pyrinomonadales;f__Pyrinomonadaceae;g__UBA11740;s__	CRISPR_spacer	c__Blastocatellia	g__UBA11740	o__Pyrinomonadales
7-1_NODE_1808	8-5_bin.8	d__Bacteria;p__Acidobacteriota;c__Blastocatellia;o__Pyrinomonadales;f__Pyrinomonadaceae;g__UBA11740;s__	CRISPR_spacer	c__Blastocatellia	g__UBA11740	o__Pyrinomonadales
8-5_NODE_29	8-5_bin.8	d__Bacteria;p__Acidobacteriota;c__Blastocatellia;o__Pyrinomonadales;f__Pyrinomonadaceae;g__UBA11740;s__	CRISPR_spacer	c__Blastocatellia	g__UBA11740	o__Pyrinomonadales
7-6_NODE_270	8-5_bin.8	d__Bacteria;p__Acidobacteriota;c__Blastocatellia;o__Pyrinomonadales;f__Pyrinomonadaceae;g__UBA11740;s__	CRISPR_spacer	c__Blastocatellia	g__UBA11740	o__Pyrinomonadales
3-4_NODE_1130	2-4_bin.28	d__Bacteria;p__Verrucomicrobiota;c__Verrucomicrobiae;o__Pedosphaerales;f__;g__;s__	blastn_homology	c__Verrucomicrobiae	g__	o__Pedosphaerales
8-3_NODE_2109	8-3_bin.1	d__Bacteria;p__Proteobacteria;c__Gammaproteobacteria;o__Burkholderiales;f__Burkholderiaceae;g__Variovorax;s__	blastn_homology	c__Gammaproteobacteria	g__Variovorax	o__Burkholderiales
3-4_NODE_498	3-4_bin.15	d__Bacteria;p__Actinobacteriota;c__Actinomycetia;o__Propionibacteriales;f__Nocardioidaceae;g__Marmoricola;s__	blastn_homology	c__Actinomycetia	g__Marmoricola	o__Propionibacteriales
2-4_NODE_274	2-4_bin.15	d__Bacteria;p__Proteobacteria;c__Gammaproteobacteria;o__REEB76;f__REEB76;g__;s__	blastn_homology	c__Gammaproteobacteria	g__	o__REEB76
2-4_NODE_1341	2-66_bin.1	d__Bacteria;p__Proteobacteria;c__Gammaproteobacteria;o__Burkholderiales;f__RBG-16-58-11;g__;s__	blastn_homology	c__Gammaproteobacteria	g__	o__Burkholderiales
6-2_NODE_2439	8-3_bin.3	d__Bacteria;p__Patescibacteria;c__Paceibacteria;o__UBA9983_A;f__UBA2103;g__C7867-001;s__	blastn_homology	c__Paceibacteria	g__C7867-001	o__UBA9983_A
8-5_NODE_744	6-4_bin.4	d__Bacteria;p__Acidobacteriota;c__Acidobacteriae;o__Acidobacteriales;f__DSPA01;g__DSPA01;s__	blastn_homology	c__Acidobacteriae	g__DSPA01	o__Acidobacteriales
7-1_NODE_2262	6-4_bin.4	d__Bacteria;p__Acidobacteriota;c__Acidobacteriae;o__Acidobacteriales;f__DSPA01;g__DSPA01;s__	blastn_homology	c__Acidobacteriae	g__DSPA01	o__Acidobacteriales
8-4_NODE_3643	5-7_bin.14	d__Bacteria;p__Proteobacteria;c__Gammaproteobacteria;o__Burkholderiales;f__Burkholderiaceae;g__CAIMXF01;s__	blastn_homology	c__Gammaproteobacteria	g__CAIMXF01	o__Burkholderiales
7-1_NODE_467	7-1_bin.2	d__Bacteria;p__Acidobacteriota;c__Vicinamibacteria;o__Fen-336;f__Fen-336;g__CADEEV01;s__	blastn_homology	c__Vicinamibacteria	g__CADEEV01	o__Fen-336
2-4_NODE_2361	2-4_bin.4	d__Bacteria;p__Bacteroidota;c__Bacteroidia;o__Chitinophagales;f__Chitinophagaceae;g__Lacibacter;s__	blastn_homology	c__Bacteroidia	g__Lacibacter	o__Chitinophagales
8-4_NODE_1158	6-3_bin.3	d__Bacteria;p__Actinobacteriota;c__UBA4738;o__UBA4738;f__HRBIN12;g__AC-51;s__	blastn_homology	c__UBA4738	g__AC-51	o__UBA4738
7-6_NODE_1420	7-6_bin.9	d__Bacteria;p__Acidobacteriota;c__Acidobacteriae;o__Acidoferrales;f__UBA7541;g__Palsa-360;s__	blastn_homology	c__Acidobacteriae	g__Palsa-360	o__Acidoferrales
3-4_NODE_1158	3-4_bin.12	d__Bacteria;p__Bacteroidota;c__Bacteroidia;o__Flavobacteriales;f__Flavobacteriaceae;g__Flavobacterium;s__	blastn_homology	c__Bacteroidia	g__Flavobacterium	o__Flavobacteriales
4-7_NODE_874	8-3_bin.3	d__Bacteria;p__Patescibacteria;c__Paceibacteria;o__UBA9983_A;f__UBA2103;g__C7867-001;s__	blastn_homology	c__Paceibacteria	g__C7867-001	o__UBA9983_A
8-5_NODE_958	8-3_bin.3	d__Bacteria;p__Patescibacteria;c__Paceibacteria;o__UBA9983_A;f__UBA2103;g__C7867-001;s__	blastn_homology	c__Paceibacteria	g__C7867-001	o__UBA9983_A
5-6_NODE_879	5-7_bin.26	d__Bacteria;p__Proteobacteria;c__Gammaproteobacteria;o__Steroidobacterales;f__Steroidobacteraceae;g__Bog-1198;s__	blastn_homology	c__Gammaproteobacteria	g__Bog-1198	o__Steroidobacterales
8-5_NODE_262	8-4_bin.3	d__Bacteria;p__Desulfobacterota_B;c__Binatia;o__Bin18;f__Bin18;g__;s__	blastn_homology	c__Binatia	g__	o__Bin18
2-4_NODE_213	6-4_bin.15	d__Bacteria;p__Actinobacteriota;c__Thermoleophilia;o__Solirubrobacterales;f__Solirubrobacteraceae;g__Palsa-744;s__	blastn_homology	c__Thermoleophilia	g__Palsa-744	o__Solirubrobacterales
3-26_NODE_299	3-26_bin.16	d__Bacteria;p__Proteobacteria;c__Gammaproteobacteria;o__Xanthomonadales;f__Xanthomonadaceae;g__Arenimonas;s__	blastn_homology	c__Gammaproteobacteria	g__Arenimonas	o__Xanthomonadales
3-26_NODE_1090	3-26_bin.4	d__Bacteria;p__Actinobacteriota;c__Actinomycetia;o__Propionibacteriales;f__Nocardioidaceae;g__Marmoricola;s__	blastn_homology	c__Actinomycetia	g__Marmoricola	o__Propionibacteriales
3-5_NODE_425	3-4_bin.4	d__Bacteria;p__Proteobacteria;c__Alphaproteobacteria;o__Rhizobiales;f__Aestuariivirgaceae;g__Aestuariivirga;s__	blastn_homology	c__Alphaproteobacteria	g__Aestuariivirga	o__Rhizobiales
3-5_NODE_425	2-4_bin.2	d__Bacteria;p__Nitrospirota;c__Nitrospiria;o__Nitrospirales;f__Nitrospiraceae;g__Nitrospira_F;s__Nitrospira_F sp002083565	blastn_homology	c__Nitrospiria	g__Nitrospira_F	o__Nitrospirales
3-5_NODE_425	4-6_bin.5	d__Bacteria;p__Acidobacteriota;c__Acidobacteriae;o__Acidobacteriales;f__SbA1;g__QIAJ01;s__	blastn_homology	c__Acidobacteriae	g__QIAJ01	o__Acidobacteriales
1-4_NODE_116	1-4_bin.8	d__Bacteria;p__Actinobacteriota;c__Thermoleophilia;o__Solirubrobacterales;f__Solirubrobacteraceae;g__SEOHO-28;s__	blastn_homology	c__Thermoleophilia	g__SEOHO-28	o__Solirubrobacterales
3-5_NODE_2612	3-5_bin.8	d__Bacteria;p__Acidobacteriota;c__Acidobacteriae;o__;f__;g__;s__	blastn_homology	c__Acidobacteriae	g__	o__
7-1_NODE_1641	7-1_bin.3	d__Bacteria;p__Gemmatimonadota;c__Gemmatimonadetes;o__Gemmatimonadales;f__JACORV01;g__;s__	blastn_homology	c__Gemmatimonadetes	g__	o__Gemmatimonadales
1-4_NODE_1678	1-1_bin.8	d__Bacteria;p__Actinobacteriota;c__Acidimicrobiia;o__Acidimicrobiales;f__CADCTF01;g__;s__	blastn_homology	c__Acidimicrobiia	g__	o__Acidimicrobiales
1-4_NODE_2661	1-1_bin.23	d__Bacteria;p__Proteobacteria;c__Gammaproteobacteria;o__SG8-11;f__SG8-11;g__UBA6921;s__	blastn_homology	c__Gammaproteobacteria	g__UBA6921	o__SG8-11
8-4_NODE_35	8-4_bin.3	d__Bacteria;p__Desulfobacterota_B;c__Binatia;o__Bin18;f__Bin18;g__;s__	blastn_homology	c__Binatia	g__	o__Bin18
5-6_NODE_1407	5-6_bin.11	d__Bacteria;p__Proteobacteria;c__Gammaproteobacteria;o__Burkholderiales;f__Burkholderiaceae;g__DSNY01;s__	blastn_homology	c__Gammaproteobacteria	g__DSNY01	o__Burkholderiales
8-3_NODE_3719	8-3_bin.3	d__Bacteria;p__Patescibacteria;c__Paceibacteria;o__UBA9983_A;f__UBA2103;g__C7867-001;s__	blastn_homology	c__Paceibacteria	g__C7867-001	o__UBA9983_A
8-3_NODE_1229	8-3_bin.3	d__Bacteria;p__Patescibacteria;c__Paceibacteria;o__UBA9983_A;f__UBA2103;g__C7867-001;s__	blastn_homology	c__Paceibacteria	g__C7867-001	o__UBA9983_A
1-8_NODE_282	1-8_bin.5	d__Bacteria;p__Patescibacteria;c__Saccharimonadia;o__Saccharimonadales;f__2-12-FULL-41-12;g__;s__	blastn_homology	c__Saccharimonadia	g__	o__Saccharimonadales
6-3_NODE_98	7-1_bin.12	d__Bacteria;p__Proteobacteria;c__Gammaproteobacteria;o__Burkholderiales;f__Burkholderiaceae;g__CADEEN01;s__	blastn_homology	c__Gammaproteobacteria	g__CADEEN01	o__Burkholderiales
2-66_NODE_396	2-56_bin.6	d__Bacteria;p__Verrucomicrobiota;c__Verrucomicrobiae;o__Pedosphaerales;f__;g__;s__	blastn_homology	c__Verrucomicrobiae	g__	o__Pedosphaerales
7-6_NODE_5554	5-6_bin.9	d__Bacteria;p__Proteobacteria;c__Gammaproteobacteria;o__Steroidobacterales;f__Steroidobacteraceae;g__Bog-1198;s__	blastn_homology	c__Gammaproteobacteria	g__Bog-1198	o__Steroidobacterales
5-6_NODE_1622	5-6_bin.9	d__Bacteria;p__Proteobacteria;c__Gammaproteobacteria;o__Steroidobacterales;f__Steroidobacteraceae;g__Bog-1198;s__	blastn_homology	c__Gammaproteobacteria	g__Bog-1198	o__Steroidobacterales
4-6_NODE_1068	4-6_bin.21	d__Bacteria;p__Patescibacteria;c__Paceibacteria;o__UBA9983_A;f__DSPV01;g__;s__	blastn_homology	c__Paceibacteria	g__	o__UBA9983_A
6-4_NODE_1420	6-4_bin.16	d__Bacteria;p__Proteobacteria;c__Gammaproteobacteria;o__Burkholderiales;f__SG8-40;g__JACQAP01;s__	blastn_homology	c__Gammaproteobacteria	g__JACQAP01	o__Burkholderiales
7-6_NODE_1966	7-6_bin.13	d__Archaea;p__Thermoproteota;c__Nitrososphaeria;o__Nitrososphaerales;f__Nitrosopumilaceae;g__TA-20;s__	blastn_homology	c__Nitrososphaeria	g__TA-20	o__Nitrososphaerales
2-4_NODE_232	2-4_bin.18	d__Bacteria;p__Proteobacteria;c__Gammaproteobacteria;o__Steroidobacterales;f__Steroidobacteraceae;g__SCUD01;s__	blastn_homology	c__Gammaproteobacteria	g__SCUD01	o__Steroidobacterales
3-4_NODE_1061	3-4_bin.4	d__Bacteria;p__Proteobacteria;c__Alphaproteobacteria;o__Rhizobiales;f__Aestuariivirgaceae;g__Aestuariivirga;s__	blastn_homology	c__Alphaproteobacteria	g__Aestuariivirga	o__Rhizobiales
7-6_NODE_2883	6-4_bin.4	d__Bacteria;p__Acidobacteriota;c__Acidobacteriae;o__Acidobacteriales;f__DSPA01;g__DSPA01;s__	blastn_homology	c__Acidobacteriae	g__DSPA01	o__Acidobacteriales
5-5_NODE_1125	8-3_bin.3	d__Bacteria;p__Patescibacteria;c__Paceibacteria;o__UBA9983_A;f__UBA2103;g__C7867-001;s__	blastn_homology	c__Paceibacteria	g__C7867-001	o__UBA9983_A
6-4_NODE_1449	8-5_bin.14	d__Bacteria;p__Gemmatimonadota;c__Gemmatimonadetes;o__Gemmatimonadales;f__Gemmatimonadaceae;g__JABWBJ01;s__	blastn_homology	c__Gemmatimonadetes	g__JABWBJ01	o__Gemmatimonadales
8-4_NODE_583	8-4_bin.8	d__Bacteria;p__Proteobacteria;c__Gammaproteobacteria;o__Burkholderiales;f__Burkholderiaceae;g__Albitalea;s__	blastn_homology	c__Gammaproteobacteria	g__Albitalea	o__Burkholderiales
6-4_NODE_1190	3-4_bin.4	d__Bacteria;p__Proteobacteria;c__Alphaproteobacteria;o__Rhizobiales;f__Aestuariivirgaceae;g__Aestuariivirga;s__	blastn_homology	c__Alphaproteobacteria	g__Aestuariivirga	o__Rhizobiales
6-4_NODE_1190	2-4_bin.2	d__Bacteria;p__Nitrospirota;c__Nitrospiria;o__Nitrospirales;f__Nitrospiraceae;g__Nitrospira_F;s__Nitrospira_F sp002083565	blastn_homology	c__Nitrospiria	g__Nitrospira_F	o__Nitrospirales
6-4_NODE_1190	4-6_bin.5	d__Bacteria;p__Acidobacteriota;c__Acidobacteriae;o__Acidobacteriales;f__SbA1;g__QIAJ01;s__	blastn_homology	c__Acidobacteriae	g__QIAJ01	o__Acidobacteriales
6-3_NODE_1404	4-2_bin.12	d__Bacteria;p__Acidobacteriota;c__Acidobacteriae;o__Acidobacteriales;f__Acidobacteriaceae;g__Terracidiphilus;s__	blastn_homology	c__Acidobacteriae	g__Terracidiphilus	o__Acidobacteriales
1-4_NODE_617	8-3_bin.3	d__Bacteria;p__Patescibacteria;c__Paceibacteria;o__UBA9983_A;f__UBA2103;g__C7867-001;s__	blastn_homology	c__Paceibacteria	g__C7867-001	o__UBA9983_A
7-6_NODE_5708	6-4_bin.4	d__Bacteria;p__Acidobacteriota;c__Acidobacteriae;o__Acidobacteriales;f__DSPA01;g__DSPA01;s__	blastn_homology	c__Acidobacteriae	g__DSPA01	o__Acidobacteriales
7-6_NODE_896	5-7_bin.14	d__Bacteria;p__Proteobacteria;c__Gammaproteobacteria;o__Burkholderiales;f__Burkholderiaceae;g__CAIMXF01;s__	blastn_homology	c__Gammaproteobacteria	g__CAIMXF01	o__Burkholderiales
7-1_NODE_2962	7-2_bin.13	d__Bacteria;p__Methylomirabilota;c__Methylomirabilia;o__Rokubacteriales;f__CSP1-6;g__;s__	blastn_homology	c__Methylomirabilia	g__	o__Rokubacteriales
6-4_NODE_2433	6-3_bin.3	d__Bacteria;p__Actinobacteriota;c__UBA4738;o__UBA4738;f__HRBIN12;g__AC-51;s__	blastn_homology	c__UBA4738	g__AC-51	o__UBA4738
8-3_NODE_1976	5-6_bin.13	d__Bacteria;p__Acidobacteriota;c__Acidobacteriae;o__Acidobacteriales;f__SbA1;g__JABCYV01;s__	blastn_homology	c__Acidobacteriae	g__JABCYV01	o__Acidobacteriales
8-4_NODE_2826	6-4_bin.4	d__Bacteria;p__Acidobacteriota;c__Acidobacteriae;o__Acidobacteriales;f__DSPA01;g__DSPA01;s__	blastn_homology	c__Acidobacteriae	g__DSPA01	o__Acidobacteriales
3-5_NODE_1276	3-5_bin.8	d__Bacteria;p__Acidobacteriota;c__Acidobacteriae;o__;f__;g__;s__	blastn_homology	c__Acidobacteriae	g__	o__
2-4_NODE_919	2-66_bin.26	d__Bacteria;p__Chloroflexota;c__Anaerolineae;o__Anaerolineales;f__EnvOPS12;g__OLB14;s__	blastn_homology	c__Anaerolineae	g__OLB14	o__Anaerolineales
8-3_NODE_398	8-3_bin.3	d__Bacteria;p__Patescibacteria;c__Paceibacteria;o__UBA9983_A;f__UBA2103;g__C7867-001;s__	blastn_homology	c__Paceibacteria	g__C7867-001	o__UBA9983_A
3-4_NODE_650	3-4_bin.3	d__Bacteria;p__Actinobacteriota;c__Actinomycetia;o__Actinomycetales;f__Micrococcaceae;g__Pseudarthrobacter;s__Pseudarthrobacter sulfonivorans_A	blastn_homology	c__Actinomycetia	g__Pseudarthrobacter	o__Actinomycetales
6-3_NODE_3987	6-3_bin.3	d__Bacteria;p__Actinobacteriota;c__UBA4738;o__UBA4738;f__HRBIN12;g__AC-51;s__	blastn_homology	c__UBA4738	g__AC-51	o__UBA4738
8-3_NODE_369	8-3_bin.3	d__Bacteria;p__Patescibacteria;c__Paceibacteria;o__UBA9983_A;f__UBA2103;g__C7867-001;s__	blastn_homology	c__Paceibacteria	g__C7867-001	o__UBA9983_A
7-2_NODE_107	1-4_bin.23	d__Bacteria;p__Proteobacteria;c__Gammaproteobacteria;o__Burkholderiales;f__Burkholderiaceae;g__Limnobacter;s__	blastn_homology	c__Gammaproteobacteria	g__Limnobacter	o__Burkholderiales
2-56_NODE_2909	2-4_bin.21	d__Bacteria;p__Bacteroidota;c__Bacteroidia;o__AKYH767;f__Palsa-965;g__GCA-2737665;s__	blastn_homology	c__Bacteroidia	g__GCA-2737665	o__AKYH767
4-7_NODE_240	5-7_bin.18	d__Bacteria;p__Actinobacteriota;c__Acidimicrobiia;o__IMCC26256;f__PALSA-555;g__;s__	blastn_homology	c__Acidimicrobiia	g__	o__IMCC26256
2-4_NODE_1452	2-4_bin.4	d__Bacteria;p__Bacteroidota;c__Bacteroidia;o__Chitinophagales;f__Chitinophagaceae;g__Lacibacter;s__	blastn_homology	c__Bacteroidia	g__Lacibacter	o__Chitinophagales
3-5_NODE_2218	3-5_bin.13	d__Bacteria;p__Acidobacteriota;c__Blastocatellia;o__Pyrinomonadales;f__Pyrinomonadaceae;g__UBA11740;s__	blastn_homology	c__Blastocatellia	g__UBA11740	o__Pyrinomonadales
6-4_NODE_495	6-4_bin.10	d__Archaea;p__Thermoproteota;c__Nitrososphaeria;o__Nitrososphaerales;f__Nitrosopumilaceae;g__TA-20;s__	blastn_homology	c__Nitrososphaeria	g__TA-20	o__Nitrososphaerales
2-4_NODE_1194	2-56_bin.21	d__Bacteria;p__Proteobacteria;c__Gammaproteobacteria;o__Burkholderiales;f__Burkholderiaceae;g__Ramlibacter;s__	blastn_homology	c__Gammaproteobacteria	g__Ramlibacter	o__Burkholderiales
1-1_NODE_3780	1-1_bin.23	d__Bacteria;p__Proteobacteria;c__Gammaproteobacteria;o__SG8-11;f__SG8-11;g__UBA6921;s__	blastn_homology	c__Gammaproteobacteria	g__UBA6921	o__SG8-11
4-7_NODE_956	4-7_bin.6	d__Bacteria;p__Acidobacteriota;c__Acidobacteriae;o__Acidobacteriales;f__SbA1;g__;s__	blastn_homology	c__Acidobacteriae	g__	o__Acidobacteriales
7-2_NODE_4667	6-4_bin.4	d__Bacteria;p__Acidobacteriota;c__Acidobacteriae;o__Acidobacteriales;f__DSPA01;g__DSPA01;s__	blastn_homology	c__Acidobacteriae	g__DSPA01	o__Acidobacteriales
5-6_NODE_804	4-7_bin.6	d__Bacteria;p__Acidobacteriota;c__Acidobacteriae;o__Acidobacteriales;f__SbA1;g__;s__	blastn_homology	c__Acidobacteriae	g__	o__Acidobacteriales
2-4_NODE_399	6-2_bin.14	d__Bacteria;p__Acidobacteriota;c__Mor1;o__Mor1;f__;g__;s__	blastn_homology	c__Mor1	g__	o__Mor1
8-5_NODE_1020	7-2_bin.13	d__Bacteria;p__Methylomirabilota;c__Methylomirabilia;o__Rokubacteriales;f__CSP1-6;g__;s__	blastn_homology	c__Methylomirabilia	g__	o__Rokubacteriales
6-2_NODE_297	1-8_vamb_8486	d__Bacteria;p__Actinobacteriota;c__Actinomycetia;o__Propionibacteriales;f__Nocardioidaceae;g__Nocardioides_B;s__	blastn_homology	c__Actinomycetia	g__Nocardioides_B	o__Propionibacteriales
6-2_NODE_297	1-8_bin.2	d__Bacteria;p__Actinobacteriota;c__Actinomycetia;o__Mycobacteriales;f__SCTD01;g__;s__	blastn_homology	c__Actinomycetia	g__	o__Mycobacteriales
8-3_NODE_220	8-3_bin.3	d__Bacteria;p__Patescibacteria;c__Paceibacteria;o__UBA9983_A;f__UBA2103;g__C7867-001;s__	blastn_homology	c__Paceibacteria	g__C7867-001	o__UBA9983_A
6-2_NODE_8548	7-6_bin.6	d__Bacteria;p__Patescibacteria;c__Paceibacteria;o__UBA9983_A;f__UBA2100;g__UBA10103;s__	blastn_homology	c__Paceibacteria	g__UBA10103	o__UBA9983_A
2-4_NODE_2663	2-4_bin.10	d__Bacteria;p__Verrucomicrobiota;c__Verrucomicrobiae;o__Opitutales;f__Opitutaceae;g__Lacunisphaera;s__	blastn_homology	c__Verrucomicrobiae	g__Lacunisphaera	o__Opitutales
8-5_NODE_2820	8-5_bin.14	d__Bacteria;p__Gemmatimonadota;c__Gemmatimonadetes;o__Gemmatimonadales;f__Gemmatimonadaceae;g__JABWBJ01;s__	blastn_homology	c__Gemmatimonadetes	g__JABWBJ01	o__Gemmatimonadales
1-4_NODE_1844	3-4_bin.4	d__Bacteria;p__Proteobacteria;c__Alphaproteobacteria;o__Rhizobiales;f__Aestuariivirgaceae;g__Aestuariivirga;s__	blastn_homology	c__Alphaproteobacteria	g__Aestuariivirga	o__Rhizobiales
1-4_NODE_1844	4-6_bin.5	d__Bacteria;p__Acidobacteriota;c__Acidobacteriae;o__Acidobacteriales;f__SbA1;g__QIAJ01;s__	blastn_homology	c__Acidobacteriae	g__QIAJ01	o__Acidobacteriales
1-4_NODE_1844	2-4_bin.2	d__Bacteria;p__Nitrospirota;c__Nitrospiria;o__Nitrospirales;f__Nitrospiraceae;g__Nitrospira_F;s__Nitrospira_F sp002083565	blastn_homology	c__Nitrospiria	g__Nitrospira_F	o__Nitrospirales
8-5_NODE_960	8-4_bin.3	d__Bacteria;p__Desulfobacterota_B;c__Binatia;o__Bin18;f__Bin18;g__;s__	blastn_homology	c__Binatia	g__	o__Bin18
7-6_NODE_1752	7-6_bin.8	d__Bacteria;p__Patescibacteria;c__Paceibacteria;o__UBA9983_A;f__CAJBRS01;g__;s__	blastn_homology	c__Paceibacteria	g__	o__UBA9983_A
4-6_NODE_699	4-6_bin.15	d__Bacteria;p__Proteobacteria;c__Gammaproteobacteria;o__Xanthomonadales;f__Xanthomonadaceae;g__Arenimonas;s__	blastn_homology	c__Gammaproteobacteria	g__Arenimonas	o__Xanthomonadales
5-6_NODE_906	5-6_bin.1	d__Bacteria;p__Methylomirabilota;c__Methylomirabilia;o__Rokubacteriales;f__CSP1-6;g__;s__	blastn_homology	c__Methylomirabilia	g__	o__Rokubacteriales
5-6_NODE_865	6-3_bin.3	d__Bacteria;p__Actinobacteriota;c__UBA4738;o__UBA4738;f__HRBIN12;g__AC-51;s__	blastn_homology	c__UBA4738	g__AC-51	o__UBA4738
6-3_NODE_2900	8-4_bin.11	d__Archaea;p__Thermoplasmatota;c__Thermoplasmata;o__;f__;g__;s__	blastn_homology	c__Thermoplasmata	g__	o__
7-6_NODE_180	6-4_bin.4	d__Bacteria;p__Acidobacteriota;c__Acidobacteriae;o__Acidobacteriales;f__DSPA01;g__DSPA01;s__	blastn_homology	c__Acidobacteriae	g__DSPA01	o__Acidobacteriales
8-3_NODE_223	8-3_bin.3	d__Bacteria;p__Patescibacteria;c__Paceibacteria;o__UBA9983_A;f__UBA2103;g__C7867-001;s__	blastn_homology	c__Paceibacteria	g__C7867-001	o__UBA9983_A
5-7_NODE_1089	8-3_bin.1	d__Bacteria;p__Proteobacteria;c__Gammaproteobacteria;o__Burkholderiales;f__Burkholderiaceae;g__Variovorax;s__	blastn_homology	c__Gammaproteobacteria	g__Variovorax	o__Burkholderiales
1-8_NODE_1693	1-8_bin.42	d__Bacteria;p__Actinobacteriota;c__Actinomycetia;o__Mycobacteriales;f__SCTD01;g__;s__	blastn_homology	c__Actinomycetia	g__	o__Mycobacteriales
8-4_NODE_337	6-4_bin.4	d__Bacteria;p__Acidobacteriota;c__Acidobacteriae;o__Acidobacteriales;f__DSPA01;g__DSPA01;s__	blastn_homology	c__Acidobacteriae	g__DSPA01	o__Acidobacteriales
8-3_NODE_106	8-3_bin.3	d__Bacteria;p__Patescibacteria;c__Paceibacteria;o__UBA9983_A;f__UBA2103;g__C7867-001;s__	blastn_homology	c__Paceibacteria	g__C7867-001	o__UBA9983_A
4-2_NODE_3372	4-6_bin.5	d__Bacteria;p__Acidobacteriota;c__Acidobacteriae;o__Acidobacteriales;f__SbA1;g__QIAJ01;s__	blastn_homology	c__Acidobacteriae	g__QIAJ01	o__Acidobacteriales
8-3_NODE_368	7-6_bin.6	d__Bacteria;p__Patescibacteria;c__Paceibacteria;o__UBA9983_A;f__UBA2100;g__UBA10103;s__	blastn_homology	c__Paceibacteria	g__UBA10103	o__UBA9983_A
5-5_NODE_833	5-7_bin.18	d__Bacteria;p__Actinobacteriota;c__Acidimicrobiia;o__IMCC26256;f__PALSA-555;g__;s__	blastn_homology	c__Acidimicrobiia	g__	o__IMCC26256
8-3_NODE_145	8-3_bin.3	d__Bacteria;p__Patescibacteria;c__Paceibacteria;o__UBA9983_A;f__UBA2103;g__C7867-001;s__	blastn_homology	c__Paceibacteria	g__C7867-001	o__UBA9983_A
8-3_NODE_146	8-4_bin.3	d__Bacteria;p__Desulfobacterota_B;c__Binatia;o__Bin18;f__Bin18;g__;s__	blastn_homology	c__Binatia	g__	o__Bin18
8-3_NODE_1178	8-3_bin.3	d__Bacteria;p__Patescibacteria;c__Paceibacteria;o__UBA9983_A;f__UBA2103;g__C7867-001;s__	blastn_homology	c__Paceibacteria	g__C7867-001	o__UBA9983_A
8-3_NODE_1140	8-3_bin.3	d__Bacteria;p__Patescibacteria;c__Paceibacteria;o__UBA9983_A;f__UBA2103;g__C7867-001;s__	blastn_homology	c__Paceibacteria	g__C7867-001	o__UBA9983_A
5-6_NODE_2562	5-6_bin.9	d__Bacteria;p__Proteobacteria;c__Gammaproteobacteria;o__Steroidobacterales;f__Steroidobacteraceae;g__Bog-1198;s__	blastn_homology	c__Gammaproteobacteria	g__Bog-1198	o__Steroidobacterales
7-6_NODE_4113	7-6_bin.13	d__Archaea;p__Thermoproteota;c__Nitrososphaeria;o__Nitrososphaerales;f__Nitrosopumilaceae;g__TA-20;s__	blastn_homology	c__Nitrososphaeria	g__TA-20	o__Nitrososphaerales
3-4_NODE_471	3-26_bin.4	d__Bacteria;p__Actinobacteriota;c__Actinomycetia;o__Propionibacteriales;f__Nocardioidaceae;g__Marmoricola;s__	blastn_homology	c__Actinomycetia	g__Marmoricola	o__Propionibacteriales
6-2_NODE_1049	6-2_bin.14	d__Bacteria;p__Acidobacteriota;c__Mor1;o__Mor1;f__;g__;s__	blastn_homology	c__Mor1	g__	o__Mor1
8-5_NODE_2646	8-5_bin.14	d__Bacteria;p__Gemmatimonadota;c__Gemmatimonadetes;o__Gemmatimonadales;f__Gemmatimonadaceae;g__JABWBJ01;s__	blastn_homology	c__Gemmatimonadetes	g__JABWBJ01	o__Gemmatimonadales
6-2_NODE_2588	7-6_bin.13	d__Archaea;p__Thermoproteota;c__Nitrososphaeria;o__Nitrososphaerales;f__Nitrosopumilaceae;g__TA-20;s__	blastn_homology	c__Nitrososphaeria	g__TA-20	o__Nitrososphaerales
5-5_NODE_1182	8-3_bin.3	d__Bacteria;p__Patescibacteria;c__Paceibacteria;o__UBA9983_A;f__UBA2103;g__C7867-001;s__	blastn_homology	c__Paceibacteria	g__C7867-001	o__UBA9983_A
8-3_NODE_1376	8-3_bin.3	d__Bacteria;p__Patescibacteria;c__Paceibacteria;o__UBA9983_A;f__UBA2103;g__C7867-001;s__	blastn_homology	c__Paceibacteria	g__C7867-001	o__UBA9983_A
6-2_NODE_2846	7-6_bin.6	d__Bacteria;p__Patescibacteria;c__Paceibacteria;o__UBA9983_A;f__UBA2100;g__UBA10103;s__	blastn_homology	c__Paceibacteria	g__UBA10103	o__UBA9983_A
3-4_NODE_1569	5-7_bin.14	d__Bacteria;p__Proteobacteria;c__Gammaproteobacteria;o__Burkholderiales;f__Burkholderiaceae;g__CAIMXF01;s__	blastn_homology	c__Gammaproteobacteria	g__CAIMXF01	o__Burkholderiales
3-4_NODE_2170	4-6_bin.15	d__Bacteria;p__Proteobacteria;c__Gammaproteobacteria;o__Xanthomonadales;f__Xanthomonadaceae;g__Arenimonas;s__	blastn_homology	c__Gammaproteobacteria	g__Arenimonas	o__Xanthomonadales
7-6_NODE_1020	7-2_bin.13	d__Bacteria;p__Methylomirabilota;c__Methylomirabilia;o__Rokubacteriales;f__CSP1-6;g__;s__	blastn_homology	c__Methylomirabilia	g__	o__Rokubacteriales
3-5_NODE_1167	3-5_bin.6	d__Bacteria;p__Proteobacteria;c__Gammaproteobacteria;o__Burkholderiales;f__Burkholderiaceae;g__Polaromonas;s__	blastn_homology	c__Gammaproteobacteria	g__Polaromonas	o__Burkholderiales
7-1_NODE_1811	7-1_bin.4	d__Bacteria;p__Gemmatimonadota;c__Gemmatimonadetes;o__Gemmatimonadales;f__Gemmatimonadaceae;g__UBA4720;s__	blastn_homology	c__Gemmatimonadetes	g__UBA4720	o__Gemmatimonadales
2-4_NODE_442	2-4_bin.23	d__Bacteria;p__Proteobacteria;c__Gammaproteobacteria;o__Acidiferrobacterales;f__UBA6901;g__JACREH01;s__	blastn_homology	c__Gammaproteobacteria	g__JACREH01	o__Acidiferrobacterales
2-56_NODE_821	2-56_bin.3	d__Bacteria;p__Proteobacteria;c__Gammaproteobacteria;o__Nevskiales;f__;g__;s__	blastn_homology	c__Gammaproteobacteria	g__	o__Nevskiales
8-3_NODE_2795	8-3_bin.3	d__Bacteria;p__Patescibacteria;c__Paceibacteria;o__UBA9983_A;f__UBA2103;g__C7867-001;s__	blastn_homology	c__Paceibacteria	g__C7867-001	o__UBA9983_A
8-5_NODE_794	2-56_bin.3	d__Bacteria;p__Proteobacteria;c__Gammaproteobacteria;o__Nevskiales;f__;g__;s__	blastn_homology	c__Gammaproteobacteria	g__	o__Nevskiales
7-2_NODE_1164	7-2_bin.7	d__Bacteria;p__Proteobacteria;c__Alphaproteobacteria;o__Reyranellales;f__Reyranellaceae;g__;s__	blastn_homology	c__Alphaproteobacteria	g__	o__Reyranellales
1-4_NODE_1775	1-4_bin.16	d__Bacteria;p__Proteobacteria;c__Alphaproteobacteria;o__Caulobacterales;f__Hyphomonadaceae;g__UBA7672;s__	blastn_homology	c__Alphaproteobacteria	g__UBA7672	o__Caulobacterales
7-1_NODE_3740	4-2_bin.12	d__Bacteria;p__Acidobacteriota;c__Acidobacteriae;o__Acidobacteriales;f__Acidobacteriaceae;g__Terracidiphilus;s__	blastn_homology	c__Acidobacteriae	g__Terracidiphilus	o__Acidobacteriales
7-1_NODE_3748	7-1_bin.4	d__Bacteria;p__Gemmatimonadota;c__Gemmatimonadetes;o__Gemmatimonadales;f__Gemmatimonadaceae;g__UBA4720;s__	blastn_homology	c__Gemmatimonadetes	g__UBA4720	o__Gemmatimonadales
7-1_NODE_2392	7-1_bin.2	d__Bacteria;p__Acidobacteriota;c__Vicinamibacteria;o__Fen-336;f__Fen-336;g__CADEEV01;s__	blastn_homology	c__Vicinamibacteria	g__CADEEV01	o__Fen-336
6-3_NODE_3245	8-4_bin.3	d__Bacteria;p__Desulfobacterota_B;c__Binatia;o__Bin18;f__Bin18;g__;s__	blastn_homology	c__Binatia	g__	o__Bin18
2-4_NODE_894	2-4_bin.27	d__Bacteria;p__Chloroflexota;c__Limnocylindria;o__Limnocylindrales;f__CSP1-4;g__UBA5189;s__	blastn_homology	c__Limnocylindria	g__UBA5189	o__Limnocylindrales
7-1_NODE_2039	7-1_bin.2	d__Bacteria;p__Acidobacteriota;c__Vicinamibacteria;o__Fen-336;f__Fen-336;g__CADEEV01;s__	blastn_homology	c__Vicinamibacteria	g__CADEEV01	o__Fen-336
1-4_NODE_690	1-4_bin.24	d__Bacteria;p__Verrucomicrobiota;c__Verrucomicrobiae;o__Opitutales;f__Opitutaceae;g__ER46;s__	blastn_homology	c__Verrucomicrobiae	g__ER46	o__Opitutales
8-4_NODE_1558	8-4_bin.3	d__Bacteria;p__Desulfobacterota_B;c__Binatia;o__Bin18;f__Bin18;g__;s__	blastn_homology	c__Binatia	g__	o__Bin18
4-6_NODE_633	4-6_bin.8	d__Bacteria;p__Proteobacteria;c__Alphaproteobacteria;o__Rhizobiales;f__Aestuariivirgaceae;g__Aestuariivirga;s__	blastn_homology	c__Alphaproteobacteria	g__Aestuariivirga	o__Rhizobiales
7-1_NODE_478	7-1_bin.14	d__Bacteria;p__Proteobacteria;c__Gammaproteobacteria;o__Burkholderiales;f__Burkholderiaceae;g__Massilia;s__	blastn_homology	c__Gammaproteobacteria	g__Massilia	o__Burkholderiales
4-6_NODE_241	4-6_bin.8	d__Bacteria;p__Proteobacteria;c__Alphaproteobacteria;o__Rhizobiales;f__Aestuariivirgaceae;g__Aestuariivirga;s__	blastn_homology	c__Alphaproteobacteria	g__Aestuariivirga	o__Rhizobiales
7-1_NODE_857	7-1_bin.14	d__Bacteria;p__Proteobacteria;c__Gammaproteobacteria;o__Burkholderiales;f__Burkholderiaceae;g__Massilia;s__	blastn_homology	c__Gammaproteobacteria	g__Massilia	o__Burkholderiales
8-3_NODE_78	8-3_bin.3	d__Bacteria;p__Patescibacteria;c__Paceibacteria;o__UBA9983_A;f__UBA2103;g__C7867-001;s__	blastn_homology	c__Paceibacteria	g__C7867-001	o__UBA9983_A
7-1_NODE_2130	8-3_bin.3	d__Bacteria;p__Patescibacteria;c__Paceibacteria;o__UBA9983_A;f__UBA2103;g__C7867-001;s__	blastn_homology	c__Paceibacteria	g__C7867-001	o__UBA9983_A
6-3_NODE_34	7-1_bin.4	d__Bacteria;p__Gemmatimonadota;c__Gemmatimonadetes;o__Gemmatimonadales;f__Gemmatimonadaceae;g__UBA4720;s__	blastn_homology	c__Gemmatimonadetes	g__UBA4720	o__Gemmatimonadales
2-56_NODE_660	2-56_bin.16	d__Bacteria;p__Proteobacteria;c__Gammaproteobacteria;o__Burkholderiales;f__SG8-41;g__UBA5216;s__	blastn_homology	c__Gammaproteobacteria	g__UBA5216	o__Burkholderiales
5-5_NODE_1212	5-7_bin.26	d__Bacteria;p__Proteobacteria;c__Gammaproteobacteria;o__Steroidobacterales;f__Steroidobacteraceae;g__Bog-1198;s__	blastn_homology	c__Gammaproteobacteria	g__Bog-1198	o__Steroidobacterales
8-3_NODE_1859	5-6_bin.5	d__Bacteria;p__Proteobacteria;c__Alphaproteobacteria;o__Rhizobiales;f__Xanthobacteraceae;g__Z2-YC6860;s__	blastn_homology	c__Alphaproteobacteria	g__Z2-YC6860	o__Rhizobiales
8-5_NODE_707	8-5_bin.7	d__Bacteria;p__Acidobacteriota;c__Acidobacteriae;o__Acidoferrales;f__UBA7541;g__Acidoferrum;s__	blastn_homology	c__Acidobacteriae	g__Acidoferrum	o__Acidoferrales
8-4_NODE_1983	8-3_bin.3	d__Bacteria;p__Patescibacteria;c__Paceibacteria;o__UBA9983_A;f__UBA2103;g__C7867-001;s__	blastn_homology	c__Paceibacteria	g__C7867-001	o__UBA9983_A
3-5_NODE_2807	3-5_bin.9	d__Bacteria;p__Proteobacteria;c__Gammaproteobacteria;o__Burkholderiales;f__Burkholderiaceae;g__CADEEN01;s__	blastn_homology	c__Gammaproteobacteria	g__CADEEN01	o__Burkholderiales
8-3_NODE_38	8-4_bin.3	d__Bacteria;p__Desulfobacterota_B;c__Binatia;o__Bin18;f__Bin18;g__;s__	blastn_homology	c__Binatia	g__	o__Bin18
1-4_NODE_492	1-4_bin.24	d__Bacteria;p__Verrucomicrobiota;c__Verrucomicrobiae;o__Opitutales;f__Opitutaceae;g__ER46;s__	blastn_homology	c__Verrucomicrobiae	g__ER46	o__Opitutales
3-26_NODE_848	3-26_bin.4	d__Bacteria;p__Actinobacteriota;c__Actinomycetia;o__Propionibacteriales;f__Nocardioidaceae;g__Marmoricola;s__	blastn_homology	c__Actinomycetia	g__Marmoricola	o__Propionibacteriales
8-3_NODE_641	8-3_bin.1	d__Bacteria;p__Proteobacteria;c__Gammaproteobacteria;o__Burkholderiales;f__Burkholderiaceae;g__Variovorax;s__	blastn_homology	c__Gammaproteobacteria	g__Variovorax	o__Burkholderiales
7-1_NODE_2016	7-1_bin.4	d__Bacteria;p__Gemmatimonadota;c__Gemmatimonadetes;o__Gemmatimonadales;f__Gemmatimonadaceae;g__UBA4720;s__	blastn_homology	c__Gemmatimonadetes	g__UBA4720	o__Gemmatimonadales
8-4_NODE_1302	8-3_bin.3	d__Bacteria;p__Patescibacteria;c__Paceibacteria;o__UBA9983_A;f__UBA2103;g__C7867-001;s__	blastn_homology	c__Paceibacteria	g__C7867-001	o__UBA9983_A
8-5_NODE_1058	5-7_bin.14	d__Bacteria;p__Proteobacteria;c__Gammaproteobacteria;o__Burkholderiales;f__Burkholderiaceae;g__CAIMXF01;s__	blastn_homology	c__Gammaproteobacteria	g__CAIMXF01	o__Burkholderiales
8-5_NODE_1093	6-3_bin.3	d__Bacteria;p__Actinobacteriota;c__UBA4738;o__UBA4738;f__HRBIN12;g__AC-51;s__	blastn_homology	c__UBA4738	g__AC-51	o__UBA4738
7-6_NODE_1077	7-6_bin.4	d__Bacteria;p__Chloroflexota;c__Limnocylindria;o__QHBO01;f__QHBO01;g__CF-167;s__	blastn_homology	c__Limnocylindria	g__CF-167	o__QHBO01
8-3_NODE_2874	8-3_bin.3	d__Bacteria;p__Patescibacteria;c__Paceibacteria;o__UBA9983_A;f__UBA2103;g__C7867-001;s__	blastn_homology	c__Paceibacteria	g__C7867-001	o__UBA9983_A
2-4_NODE_15	1-4_bin.5	d__Bacteria;p__Actinobacteriota;c__Actinomycetia;o__Actinomycetales;f__Micrococcaceae;g__Arthrobacter_I;s__	blastn_homology	c__Actinomycetia	g__Arthrobacter_I	o__Actinomycetales
5-5_NODE_628	5-7_bin.14	d__Bacteria;p__Proteobacteria;c__Gammaproteobacteria;o__Burkholderiales;f__Burkholderiaceae;g__CAIMXF01;s__	blastn_homology	c__Gammaproteobacteria	g__CAIMXF01	o__Burkholderiales
5-5_NODE_3736	5-5_bin.2	d__Bacteria;p__Actinobacteriota;c__Actinomycetia;o__Actinomycetales;f__Micrococcaceae;g__Arthrobacter_I;s__	blastn_homology	c__Actinomycetia	g__Arthrobacter_I	o__Actinomycetales
7-2_NODE_1124	7-2_bin.7	d__Bacteria;p__Proteobacteria;c__Alphaproteobacteria;o__Reyranellales;f__Reyranellaceae;g__;s__	blastn_homology	c__Alphaproteobacteria	g__	o__Reyranellales
1-1_NODE_650	1-1_bin.8	d__Bacteria;p__Actinobacteriota;c__Acidimicrobiia;o__Acidimicrobiales;f__CADCTF01;g__;s__	blastn_homology	c__Acidimicrobiia	g__	o__Acidimicrobiales
6-2_NODE_1607	8-3_bin.3	d__Bacteria;p__Patescibacteria;c__Paceibacteria;o__UBA9983_A;f__UBA2103;g__C7867-001;s__	blastn_homology	c__Paceibacteria	g__C7867-001	o__UBA9983_A
6-3_NODE_7	6-2_bin.12	d__Bacteria;p__Proteobacteria;c__Alphaproteobacteria;o__Rhizobiales;f__Xanthobacteraceae;g__Z2-YC6860;s__	blastn_homology	c__Alphaproteobacteria	g__Z2-YC6860	o__Rhizobiales
6-4_NODE_59	6-4_bin.4	d__Bacteria;p__Acidobacteriota;c__Acidobacteriae;o__Acidobacteriales;f__DSPA01;g__DSPA01;s__	blastn_homology	c__Acidobacteriae	g__DSPA01	o__Acidobacteriales
8-3_NODE_2230	8-3_bin.3	d__Bacteria;p__Patescibacteria;c__Paceibacteria;o__UBA9983_A;f__UBA2103;g__C7867-001;s__	blastn_homology	c__Paceibacteria	g__C7867-001	o__UBA9983_A
6-4_NODE_1622	6-4_bin.4	d__Bacteria;p__Acidobacteriota;c__Acidobacteriae;o__Acidobacteriales;f__DSPA01;g__DSPA01;s__	blastn_homology	c__Acidobacteriae	g__DSPA01	o__Acidobacteriales
6-4_NODE_1622	7-2_bin.13	d__Bacteria;p__Methylomirabilota;c__Methylomirabilia;o__Rokubacteriales;f__CSP1-6;g__;s__	blastn_homology	c__Methylomirabilia	g__	o__Rokubacteriales
8-3_NODE_1702	8-3_bin.3	d__Bacteria;p__Patescibacteria;c__Paceibacteria;o__UBA9983_A;f__UBA2103;g__C7867-001;s__	blastn_homology	c__Paceibacteria	g__C7867-001	o__UBA9983_A
8-5_NODE_48	8-4_bin.3	d__Bacteria;p__Desulfobacterota_B;c__Binatia;o__Bin18;f__Bin18;g__;s__	blastn_homology	c__Binatia	g__	o__Bin18
6-3_NODE_4520	8-3_bin.3	d__Bacteria;p__Patescibacteria;c__Paceibacteria;o__UBA9983_A;f__UBA2103;g__C7867-001;s__	blastn_homology	c__Paceibacteria	g__C7867-001	o__UBA9983_A
7-2_NODE_1214	8-5_bin.14	d__Bacteria;p__Gemmatimonadota;c__Gemmatimonadetes;o__Gemmatimonadales;f__Gemmatimonadaceae;g__JABWBJ01;s__	blastn_homology	c__Gemmatimonadetes	g__JABWBJ01	o__Gemmatimonadales
2-4_NODE_1068	2-4_bin.12	d__Bacteria;p__Proteobacteria;c__Gammaproteobacteria;o__Nevskiales;f__Nevskiaceae;g__;s__	blastn_homology	c__Gammaproteobacteria	g__	o__Nevskiales
2-4_NODE_1068	2-4_bin.15	d__Bacteria;p__Proteobacteria;c__Gammaproteobacteria;o__REEB76;f__REEB76;g__;s__	blastn_homology	c__Gammaproteobacteria	g__	o__REEB76
7-2_NODE_3417	6-4_bin.4	d__Bacteria;p__Acidobacteriota;c__Acidobacteriae;o__Acidobacteriales;f__DSPA01;g__DSPA01;s__	blastn_homology	c__Acidobacteriae	g__DSPA01	o__Acidobacteriales
5-5_NODE_3196	4-7_bin.6	d__Bacteria;p__Acidobacteriota;c__Acidobacteriae;o__Acidobacteriales;f__SbA1;g__;s__	blastn_homology	c__Acidobacteriae	g__	o__Acidobacteriales
1-4_NODE_1075	6-3_bin.3	d__Bacteria;p__Actinobacteriota;c__UBA4738;o__UBA4738;f__HRBIN12;g__AC-51;s__	blastn_homology	c__UBA4738	g__AC-51	o__UBA4738
5-7_NODE_702	5-7_bin.14	d__Bacteria;p__Proteobacteria;c__Gammaproteobacteria;o__Burkholderiales;f__Burkholderiaceae;g__CAIMXF01;s__	blastn_homology	c__Gammaproteobacteria	g__CAIMXF01	o__Burkholderiales
3-26_NODE_205	3-26_bin.20	d__Bacteria;p__Proteobacteria;c__Gammaproteobacteria;o__Burkholderiales;f__Burkholderiaceae;g__Massilia;s__Massilia sp900129765	blastn_homology	c__Gammaproteobacteria	g__Massilia	o__Burkholderiales
6-3_NODE_1978	7-6_bin.13	d__Archaea;p__Thermoproteota;c__Nitrososphaeria;o__Nitrososphaerales;f__Nitrosopumilaceae;g__TA-20;s__	blastn_homology	c__Nitrososphaeria	g__TA-20	o__Nitrososphaerales
5-5_NODE_6	8-3_bin.3	d__Bacteria;p__Patescibacteria;c__Paceibacteria;o__UBA9983_A;f__UBA2103;g__C7867-001;s__	blastn_homology	c__Paceibacteria	g__C7867-001	o__UBA9983_A
2-4_NODE_1129	2-56_bin.21	d__Bacteria;p__Proteobacteria;c__Gammaproteobacteria;o__Burkholderiales;f__Burkholderiaceae;g__Ramlibacter;s__	blastn_homology	c__Gammaproteobacteria	g__Ramlibacter	o__Burkholderiales
5-5_NODE_39	5-7_bin.1	d__Bacteria;p__Methylomirabilota;c__Methylomirabilia;o__Rokubacteriales;f__CSP1-6;g__;s__	blastn_homology	c__Methylomirabilia	g__	o__Rokubacteriales
4-6_NODE_594	7-2_bin.13	d__Bacteria;p__Methylomirabilota;c__Methylomirabilia;o__Rokubacteriales;f__CSP1-6;g__;s__	blastn_homology	c__Methylomirabilia	g__	o__Rokubacteriales
5-5_NODE_1614	5-7_bin.26	d__Bacteria;p__Proteobacteria;c__Gammaproteobacteria;o__Steroidobacterales;f__Steroidobacteraceae;g__Bog-1198;s__	blastn_homology	c__Gammaproteobacteria	g__Bog-1198	o__Steroidobacterales
3-4_NODE_1261	3-4_bin.12	d__Bacteria;p__Bacteroidota;c__Bacteroidia;o__Flavobacteriales;f__Flavobacteriaceae;g__Flavobacterium;s__	blastn_homology	c__Bacteroidia	g__Flavobacterium	o__Flavobacteriales
4-2_NODE_1301	4-2_bin.8	d__Bacteria;p__Planctomycetota;c__GCA-002687715;o__GCA-002687715;f__CAIWVZ01;g__;s__	blastn_homology	c__GCA-002687715	g__	o__GCA-002687715
5-6_NODE_920	5-6_bin.7	d__Bacteria;p__Patescibacteria;c__Paceibacteria;o__UBA9983_A;f__UBA9973;g__UBA9973;s__	blastn_homology	c__Paceibacteria	g__UBA9973	o__UBA9983_A
2-4_NODE_342	2-4_bin.16	d__Bacteria;p__Chloroflexota;c__Limnocylindria;o__QHBO01;f__QHBO01;g__;s__	blastn_homology	c__Limnocylindria	g__	o__QHBO01
2-4_NODE_1496	2-4_bin.28	d__Bacteria;p__Verrucomicrobiota;c__Verrucomicrobiae;o__Pedosphaerales;f__;g__;s__	blastn_homology	c__Verrucomicrobiae	g__	o__Pedosphaerales
6-4_NODE_107	2-4_bin.28	d__Bacteria;p__Verrucomicrobiota;c__Verrucomicrobiae;o__Pedosphaerales;f__;g__;s__	blastn_homology	c__Verrucomicrobiae	g__	o__Pedosphaerales
6-4_NODE_104	5-7_bin.1	d__Bacteria;p__Methylomirabilota;c__Methylomirabilia;o__Rokubacteriales;f__CSP1-6;g__;s__	blastn_homology	c__Methylomirabilia	g__	o__Rokubacteriales
2-56_NODE_544	2-56_bin.12	d__Bacteria;p__Chloroflexota;c__Limnocylindria;o__Limnocylindrales;f__CSP1-4;g__UBA5189;s__	blastn_homology	c__Limnocylindria	g__UBA5189	o__Limnocylindrales
4-7_NODE_1044	4-7_bin.3	d__Bacteria;p__Chloroflexota;c__Limnocylindria;o__Limnocylindrales;f__CSP1-4;g__Chersky-267;s__	blastn_homology	c__Limnocylindria	g__Chersky-267	o__Limnocylindrales
3-5_NODE_2125	3-5_bin.8	d__Bacteria;p__Acidobacteriota;c__Acidobacteriae;o__;f__;g__;s__	blastn_homology	c__Acidobacteriae	g__	o__
8-3_NODE_799	8-3_bin.3	d__Bacteria;p__Patescibacteria;c__Paceibacteria;o__UBA9983_A;f__UBA2103;g__C7867-001;s__	blastn_homology	c__Paceibacteria	g__C7867-001	o__UBA9983_A
5-5_NODE_142	5-7_bin.26	d__Bacteria;p__Proteobacteria;c__Gammaproteobacteria;o__Steroidobacterales;f__Steroidobacteraceae;g__Bog-1198;s__	blastn_homology	c__Gammaproteobacteria	g__Bog-1198	o__Steroidobacterales
6-4_NODE_4093	6-4_bin.4	d__Bacteria;p__Acidobacteriota;c__Acidobacteriae;o__Acidobacteriales;f__DSPA01;g__DSPA01;s__	blastn_homology	c__Acidobacteriae	g__DSPA01	o__Acidobacteriales
7-1_NODE_244	7-1_bin.4	d__Bacteria;p__Gemmatimonadota;c__Gemmatimonadetes;o__Gemmatimonadales;f__Gemmatimonadaceae;g__UBA4720;s__	blastn_homology	c__Gemmatimonadetes	g__UBA4720	o__Gemmatimonadales
6-3_NODE_394	5-7_bin.26	d__Bacteria;p__Proteobacteria;c__Gammaproteobacteria;o__Steroidobacterales;f__Steroidobacteraceae;g__Bog-1198;s__	blastn_homology	c__Gammaproteobacteria	g__Bog-1198	o__Steroidobacterales
7-6_NODE_1552	7-6_bin.13	d__Archaea;p__Thermoproteota;c__Nitrososphaeria;o__Nitrososphaerales;f__Nitrosopumilaceae;g__TA-20;s__	blastn_homology	c__Nitrososphaeria	g__TA-20	o__Nitrososphaerales
7-6_NODE_1559	7-6_bin.5	d__Bacteria;p__Actinobacteriota;c__UBA4738;o__UBA4738;f__HRBIN12;g__AC-51;s__	blastn_homology	c__UBA4738	g__AC-51	o__UBA4738
7-1_NODE_57	6-4_bin.4	d__Bacteria;p__Acidobacteriota;c__Acidobacteriae;o__Acidobacteriales;f__DSPA01;g__DSPA01;s__	blastn_homology	c__Acidobacteriae	g__DSPA01	o__Acidobacteriales
7-1_NODE_310	6-4_bin.4	d__Bacteria;p__Acidobacteriota;c__Acidobacteriae;o__Acidobacteriales;f__DSPA01;g__DSPA01;s__	blastn_homology	c__Acidobacteriae	g__DSPA01	o__Acidobacteriales
4-6_NODE_228	4-6_bin.9	d__Bacteria;p__Armatimonadota;c__Fimbriimonadia;o__Fimbriimonadales;f__ATM1;g__JACDEQ01;s__	blastn_homology	c__Fimbriimonadia	g__JACDEQ01	o__Fimbriimonadales
8-4_NODE_2156	5-6_bin.9	d__Bacteria;p__Proteobacteria;c__Gammaproteobacteria;o__Steroidobacterales;f__Steroidobacteraceae;g__Bog-1198;s__	blastn_homology	c__Gammaproteobacteria	g__Bog-1198	o__Steroidobacterales
8-3_NODE_908	8-3_bin.3	d__Bacteria;p__Patescibacteria;c__Paceibacteria;o__UBA9983_A;f__UBA2103;g__C7867-001;s__	blastn_homology	c__Paceibacteria	g__C7867-001	o__UBA9983_A
8-4_NODE_1223	4-7_bin.3	d__Bacteria;p__Chloroflexota;c__Limnocylindria;o__Limnocylindrales;f__CSP1-4;g__Chersky-267;s__	blastn_homology	c__Limnocylindria	g__Chersky-267	o__Limnocylindrales
8-3_NODE_1143	8-3_bin.3	d__Bacteria;p__Patescibacteria;c__Paceibacteria;o__UBA9983_A;f__UBA2103;g__C7867-001;s__	blastn_homology	c__Paceibacteria	g__C7867-001	o__UBA9983_A
6-4_NODE_2500	4-7_bin.3	d__Bacteria;p__Chloroflexota;c__Limnocylindria;o__Limnocylindrales;f__CSP1-4;g__Chersky-267;s__	blastn_homology	c__Limnocylindria	g__Chersky-267	o__Limnocylindrales
1-4_NODE_201	7-1_bin.2	d__Bacteria;p__Acidobacteriota;c__Vicinamibacteria;o__Fen-336;f__Fen-336;g__CADEEV01;s__	blastn_homology	c__Vicinamibacteria	g__CADEEV01	o__Fen-336
1-4_NODE_200	1-4_bin.13	d__Bacteria;p__Actinobacteriota;c__Acidimicrobiia;o__Acidimicrobiales;f__Ilumatobacteraceae;g__UBA668;s__	blastn_homology	c__Acidimicrobiia	g__UBA668	o__Acidimicrobiales
1-8_NODE_912	1-8_bin.42	d__Bacteria;p__Actinobacteriota;c__Actinomycetia;o__Mycobacteriales;f__SCTD01;g__;s__	blastn_homology	c__Actinomycetia	g__	o__Mycobacteriales
1-8_NODE_912	1-8_bin.28	d__Bacteria;p__Actinobacteriota;c__Actinomycetia;o__Propionibacteriales;f__Nocardioidaceae;g__Nocardioides;s__	blastn_homology	c__Actinomycetia	g__Nocardioides	o__Propionibacteriales
8-3_NODE_459	5-6_bin.9	d__Bacteria;p__Proteobacteria;c__Gammaproteobacteria;o__Steroidobacterales;f__Steroidobacteraceae;g__Bog-1198;s__	blastn_homology	c__Gammaproteobacteria	g__Bog-1198	o__Steroidobacterales
4-6_NODE_961	4-6_bin.10	d__Bacteria;p__Proteobacteria;c__Gammaproteobacteria;o__Xanthomonadales;f__Xanthomonadaceae;g__Arenimonas;s__	blastn_homology	c__Gammaproteobacteria	g__Arenimonas	o__Xanthomonadales
2-4_NODE_29	2-4_bin.28	d__Bacteria;p__Verrucomicrobiota;c__Verrucomicrobiae;o__Pedosphaerales;f__;g__;s__	blastn_homology	c__Verrucomicrobiae	g__	o__Pedosphaerales
7-2_NODE_2400	7-2_bin.15	d__Bacteria;p__Gemmatimonadota;c__Gemmatimonadetes;o__Gemmatimonadales;f__Gemmatimonadaceae;g__UBA4720;s__	blastn_homology	c__Gemmatimonadetes	g__UBA4720	o__Gemmatimonadales
3-26_NODE_392	3-26_bin.15	d__Bacteria;p__Acidobacteriota;c__Vicinamibacteria;o__Vicinamibacterales;f__SCN-69-37;g__SYFT01;s__	blastn_homology	c__Vicinamibacteria	g__SYFT01	o__Vicinamibacterales
7-1_NODE_100	1-4_bin.5	d__Bacteria;p__Actinobacteriota;c__Actinomycetia;o__Actinomycetales;f__Micrococcaceae;g__Arthrobacter_I;s__	blastn_homology	c__Actinomycetia	g__Arthrobacter_I	o__Actinomycetales
1-8_NODE_1146	1-8_bin.29	d__Bacteria;p__Acidobacteriota;c__Blastocatellia;o__Pyrinomonadales;f__Pyrinomonadaceae;g__OLB17;s__	blastn_homology	c__Blastocatellia	g__OLB17	o__Pyrinomonadales
1-4_NODE_124	1-4_bin.3	d__Bacteria;p__Verrucomicrobiota;c__Verrucomicrobiae;o__Pedosphaerales;f__SXQI01;g__;s__	blastn_homology	c__Verrucomicrobiae	g__	o__Pedosphaerales
1-4_NODE_126	1-4_bin.5	d__Bacteria;p__Actinobacteriota;c__Actinomycetia;o__Actinomycetales;f__Micrococcaceae;g__Arthrobacter_I;s__	blastn_homology	c__Actinomycetia	g__Arthrobacter_I	o__Actinomycetales
7-6_NODE_981	7-6_bin.13	d__Archaea;p__Thermoproteota;c__Nitrososphaeria;o__Nitrososphaerales;f__Nitrosopumilaceae;g__TA-20;s__	blastn_homology	c__Nitrososphaeria	g__TA-20	o__Nitrososphaerales
1-4_NODE_1930	1-4_bin.16	d__Bacteria;p__Proteobacteria;c__Alphaproteobacteria;o__Caulobacterales;f__Hyphomonadaceae;g__UBA7672;s__	blastn_homology	c__Alphaproteobacteria	g__UBA7672	o__Caulobacterales
6-3_NODE_108	7-2_bin.11	d__Bacteria;p__Proteobacteria;c__Alphaproteobacteria;o__ATCC43930;f__Stellaceae;g__Aliidongia;s__	blastn_homology	c__Alphaproteobacteria	g__Aliidongia	o__ATCC43930
2-56_NODE_3682	2-56_bin.19	d__Bacteria;p__Bacteroidota;c__Bacteroidia;o__AKYH767;f__B-17BO;g__JADJDM01;s__	blastn_homology	c__Bacteroidia	g__JADJDM01	o__AKYH767
2-56_NODE_1321	3-26_bin.4	d__Bacteria;p__Actinobacteriota;c__Actinomycetia;o__Propionibacteriales;f__Nocardioidaceae;g__Marmoricola;s__	blastn_homology	c__Actinomycetia	g__Marmoricola	o__Propionibacteriales
2-4_NODE_1907	2-66_bin.29	d__Bacteria;p__Proteobacteria;c__Gammaproteobacteria;o__Acidiferrobacterales;f__Sulfurifustaceae;g__Sulfuricaulis;s__	blastn_homology	c__Gammaproteobacteria	g__Sulfuricaulis	o__Acidiferrobacterales
8-3_NODE_752	8-3_bin.3	d__Bacteria;p__Patescibacteria;c__Paceibacteria;o__UBA9983_A;f__UBA2103;g__C7867-001;s__	blastn_homology	c__Paceibacteria	g__C7867-001	o__UBA9983_A
8-3_NODE_1676	8-3_bin.3	d__Bacteria;p__Patescibacteria;c__Paceibacteria;o__UBA9983_A;f__UBA2103;g__C7867-001;s__	blastn_homology	c__Paceibacteria	g__C7867-001	o__UBA9983_A
6-3_NODE_343	6-4_bin.4	d__Bacteria;p__Acidobacteriota;c__Acidobacteriae;o__Acidobacteriales;f__DSPA01;g__DSPA01;s__	blastn_homology	c__Acidobacteriae	g__DSPA01	o__Acidobacteriales
8-5_NODE_572	8-3_bin.1	d__Bacteria;p__Proteobacteria;c__Gammaproteobacteria;o__Burkholderiales;f__Burkholderiaceae;g__Variovorax;s__	blastn_homology	c__Gammaproteobacteria	g__Variovorax	o__Burkholderiales
1-1_NODE_423	1-1_bin.8	d__Bacteria;p__Actinobacteriota;c__Acidimicrobiia;o__Acidimicrobiales;f__CADCTF01;g__;s__	blastn_homology	c__Acidimicrobiia	g__	o__Acidimicrobiales
5-5_NODE_2160	4-6_bin.5	d__Bacteria;p__Acidobacteriota;c__Acidobacteriae;o__Acidobacteriales;f__SbA1;g__QIAJ01;s__	blastn_homology	c__Acidobacteriae	g__QIAJ01	o__Acidobacteriales
7-1_NODE_3340	7-1_bin.3	d__Bacteria;p__Gemmatimonadota;c__Gemmatimonadetes;o__Gemmatimonadales;f__JACORV01;g__;s__	blastn_homology	c__Gemmatimonadetes	g__	o__Gemmatimonadales
6-2_NODE_3150	7-6_bin.6	d__Bacteria;p__Patescibacteria;c__Paceibacteria;o__UBA9983_A;f__UBA2100;g__UBA10103;s__	blastn_homology	c__Paceibacteria	g__UBA10103	o__UBA9983_A
6-2_NODE_1686	8-3_bin.3	d__Bacteria;p__Patescibacteria;c__Paceibacteria;o__UBA9983_A;f__UBA2103;g__C7867-001;s__	blastn_homology	c__Paceibacteria	g__C7867-001	o__UBA9983_A
2-4_NODE_587	2-4_bin.15	d__Bacteria;p__Proteobacteria;c__Gammaproteobacteria;o__REEB76;f__REEB76;g__;s__	blastn_homology	c__Gammaproteobacteria	g__	o__REEB76
8-3_NODE_9	8-3_bin.3	d__Bacteria;p__Patescibacteria;c__Paceibacteria;o__UBA9983_A;f__UBA2103;g__C7867-001;s__	blastn_homology	c__Paceibacteria	g__C7867-001	o__UBA9983_A
6-4_NODE_1028	6-4_bin.15	d__Bacteria;p__Actinobacteriota;c__Thermoleophilia;o__Solirubrobacterales;f__Solirubrobacteraceae;g__Palsa-744;s__	blastn_homology	c__Thermoleophilia	g__Palsa-744	o__Solirubrobacterales
6-2_NODE_2029	6-2_bin.17	d__Bacteria;p__Proteobacteria;c__Gammaproteobacteria;o__Burkholderiales;f__SG8-40;g__JACQAP01;s__	blastn_homology	c__Gammaproteobacteria	g__JACQAP01	o__Burkholderiales
7-6_NODE_949	7-6_bin.6	d__Bacteria;p__Patescibacteria;c__Paceibacteria;o__UBA9983_A;f__UBA2100;g__UBA10103;s__	blastn_homology	c__Paceibacteria	g__UBA10103	o__UBA9983_A
5-7_NODE_1330	5-7_bin.26	d__Bacteria;p__Proteobacteria;c__Gammaproteobacteria;o__Steroidobacterales;f__Steroidobacteraceae;g__Bog-1198;s__	blastn_homology	c__Gammaproteobacteria	g__Bog-1198	o__Steroidobacterales
5-6_NODE_2008	5-6_bin.5	d__Bacteria;p__Proteobacteria;c__Alphaproteobacteria;o__Rhizobiales;f__Xanthobacteraceae;g__Z2-YC6860;s__	blastn_homology	c__Alphaproteobacteria	g__Z2-YC6860	o__Rhizobiales
1-4_NODE_988	1-4_bin.1	d__Bacteria;p__Proteobacteria;c__Gammaproteobacteria;o__Burkholderiales;f__Thiobacillaceae;g__;s__	blastn_homology	c__Gammaproteobacteria	g__	o__Burkholderiales
5-7_NODE_298	5-7_bin.26	d__Bacteria;p__Proteobacteria;c__Gammaproteobacteria;o__Steroidobacterales;f__Steroidobacteraceae;g__Bog-1198;s__	blastn_homology	c__Gammaproteobacteria	g__Bog-1198	o__Steroidobacterales
7-1_NODE_2386	6-3_bin.3	d__Bacteria;p__Actinobacteriota;c__UBA4738;o__UBA4738;f__HRBIN12;g__AC-51;s__	blastn_homology	c__UBA4738	g__AC-51	o__UBA4738
7-1_NODE_3407	7-1_bin.4	d__Bacteria;p__Gemmatimonadota;c__Gemmatimonadetes;o__Gemmatimonadales;f__Gemmatimonadaceae;g__UBA4720;s__	blastn_homology	c__Gemmatimonadetes	g__UBA4720	o__Gemmatimonadales
8-3_NODE_271	8-3_bin.3	d__Bacteria;p__Patescibacteria;c__Paceibacteria;o__UBA9983_A;f__UBA2103;g__C7867-001;s__	blastn_homology	c__Paceibacteria	g__C7867-001	o__UBA9983_A
1-4_NODE_443	1-4_bin.8	d__Bacteria;p__Actinobacteriota;c__Thermoleophilia;o__Solirubrobacterales;f__Solirubrobacteraceae;g__SEOHO-28;s__	blastn_homology	c__Thermoleophilia	g__SEOHO-28	o__Solirubrobacterales
1-4_NODE_443	1-4_bin.14	d__Bacteria;p__Actinobacteriota;c__Acidimicrobiia;o__Acidimicrobiales;f__JACDEA01;g__JACCXE01;s__	blastn_homology	c__Acidimicrobiia	g__JACCXE01	o__Acidimicrobiales
1-4_NODE_446	7-1_bin.4	d__Bacteria;p__Gemmatimonadota;c__Gemmatimonadetes;o__Gemmatimonadales;f__Gemmatimonadaceae;g__UBA4720;s__	blastn_homology	c__Gemmatimonadetes	g__UBA4720	o__Gemmatimonadales
2-4_NODE_2531	2-56_bin.3	d__Bacteria;p__Proteobacteria;c__Gammaproteobacteria;o__Nevskiales;f__;g__;s__	blastn_homology	c__Gammaproteobacteria	g__	o__Nevskiales
5-7_NODE_1187	5-7_bin.15	d__Bacteria;p__Nitrospirota;c__Nitrospiria;o__Nitrospirales;f__Nitrospiraceae;g__Palsa-1315;s__	blastn_homology	c__Nitrospiria	g__Palsa-1315	o__Nitrospirales
7-6_NODE_1501	7-6_bin.13	d__Archaea;p__Thermoproteota;c__Nitrososphaeria;o__Nitrososphaerales;f__Nitrosopumilaceae;g__TA-20;s__	blastn_homology	c__Nitrososphaeria	g__TA-20	o__Nitrososphaerales
2-4_NODE_2753	2-4_bin.15	d__Bacteria;p__Proteobacteria;c__Gammaproteobacteria;o__REEB76;f__REEB76;g__;s__	blastn_homology	c__Gammaproteobacteria	g__	o__REEB76
6-4_NODE_36	1-4_bin.5	d__Bacteria;p__Actinobacteriota;c__Actinomycetia;o__Actinomycetales;f__Micrococcaceae;g__Arthrobacter_I;s__	blastn_homology	c__Actinomycetia	g__Arthrobacter_I	o__Actinomycetales
4-7_NODE_1197	4-7_bin.6	d__Bacteria;p__Acidobacteriota;c__Acidobacteriae;o__Acidobacteriales;f__SbA1;g__;s__	blastn_homology	c__Acidobacteriae	g__	o__Acidobacteriales
5-6_NODE_833	5-6_bin.5	d__Bacteria;p__Proteobacteria;c__Alphaproteobacteria;o__Rhizobiales;f__Xanthobacteraceae;g__Z2-YC6860;s__	blastn_homology	c__Alphaproteobacteria	g__Z2-YC6860	o__Rhizobiales
5-6_NODE_839	5-6_bin.9	d__Bacteria;p__Proteobacteria;c__Gammaproteobacteria;o__Steroidobacterales;f__Steroidobacteraceae;g__Bog-1198;s__	blastn_homology	c__Gammaproteobacteria	g__Bog-1198	o__Steroidobacterales
8-3_NODE_3796	8-3_bin.3	d__Bacteria;p__Patescibacteria;c__Paceibacteria;o__UBA9983_A;f__UBA2103;g__C7867-001;s__	blastn_homology	c__Paceibacteria	g__C7867-001	o__UBA9983_A
4-6_NODE_1027	4-6_bin.5	d__Bacteria;p__Acidobacteriota;c__Acidobacteriae;o__Acidobacteriales;f__SbA1;g__QIAJ01;s__	blastn_homology	c__Acidobacteriae	g__QIAJ01	o__Acidobacteriales
4-6_NODE_1020	4-6_bin.18	d__Bacteria;p__Chloroflexota;c__Anaerolineae;o__Anaerolineales;f__UBA6663;g__;s__	blastn_homology	c__Anaerolineae	g__	o__Anaerolineales
2-4_NODE_48	2-4_bin.28	d__Bacteria;p__Verrucomicrobiota;c__Verrucomicrobiae;o__Pedosphaerales;f__;g__;s__	blastn_homology	c__Verrucomicrobiae	g__	o__Pedosphaerales
7-6_NODE_3916	6-4_bin.4	d__Bacteria;p__Acidobacteriota;c__Acidobacteriae;o__Acidobacteriales;f__DSPA01;g__DSPA01;s__	blastn_homology	c__Acidobacteriae	g__DSPA01	o__Acidobacteriales
7-2_NODE_1416	7-2_bin.13	d__Bacteria;p__Methylomirabilota;c__Methylomirabilia;o__Rokubacteriales;f__CSP1-6;g__;s__	blastn_homology	c__Methylomirabilia	g__	o__Rokubacteriales
6-4_NODE_4144	8-3_bin.3	d__Bacteria;p__Patescibacteria;c__Paceibacteria;o__UBA9983_A;f__UBA2103;g__C7867-001;s__	blastn_homology	c__Paceibacteria	g__C7867-001	o__UBA9983_A
7-6_NODE_2617	6-4_bin.4	d__Bacteria;p__Acidobacteriota;c__Acidobacteriae;o__Acidobacteriales;f__DSPA01;g__DSPA01;s__	blastn_homology	c__Acidobacteriae	g__DSPA01	o__Acidobacteriales
7-6_NODE_2617	7-2_bin.13	d__Bacteria;p__Methylomirabilota;c__Methylomirabilia;o__Rokubacteriales;f__CSP1-6;g__;s__	blastn_homology	c__Methylomirabilia	g__	o__Rokubacteriales
8-3_NODE_4758	8-3_bin.3	d__Bacteria;p__Patescibacteria;c__Paceibacteria;o__UBA9983_A;f__UBA2103;g__C7867-001;s__	blastn_homology	c__Paceibacteria	g__C7867-001	o__UBA9983_A
5-5_NODE_2801	5-6_bin.6	d__Bacteria;p__Actinobacteriota;c__Thermoleophilia;o__Solirubrobacterales;f__Solirubrobacteraceae;g__Palsa-744;s__	blastn_homology	c__Thermoleophilia	g__Palsa-744	o__Solirubrobacterales
8-5_NODE_487	8-5_bin.14	d__Bacteria;p__Gemmatimonadota;c__Gemmatimonadetes;o__Gemmatimonadales;f__Gemmatimonadaceae;g__JABWBJ01;s__	blastn_homology	c__Gemmatimonadetes	g__JABWBJ01	o__Gemmatimonadales
2-56_NODE_247	3-4_bin.6	d__Bacteria;p__Zixibacteria;c__MSB-5A5;o__DSPP01;f__WJJR01;g__JACQFV01;s__	blastn_homology	c__MSB-5A5	g__JACQFV01	o__DSPP01
5-7_NODE_1074	5-7_bin.26	d__Bacteria;p__Proteobacteria;c__Gammaproteobacteria;o__Steroidobacterales;f__Steroidobacteraceae;g__Bog-1198;s__	blastn_homology	c__Gammaproteobacteria	g__Bog-1198	o__Steroidobacterales
3-26_NODE_334	3-4_bin.15	d__Bacteria;p__Actinobacteriota;c__Actinomycetia;o__Propionibacteriales;f__Nocardioidaceae;g__Marmoricola;s__	blastn_homology	c__Actinomycetia	g__Marmoricola	o__Propionibacteriales
7-1_NODE_4025	7-1_bin.2	d__Bacteria;p__Acidobacteriota;c__Vicinamibacteria;o__Fen-336;f__Fen-336;g__CADEEV01;s__	blastn_homology	c__Vicinamibacteria	g__CADEEV01	o__Fen-336
7-2_NODE_1254	7-2_bin.15	d__Bacteria;p__Gemmatimonadota;c__Gemmatimonadetes;o__Gemmatimonadales;f__Gemmatimonadaceae;g__UBA4720;s__	blastn_homology	c__Gemmatimonadetes	g__UBA4720	o__Gemmatimonadales
8-4_NODE_1180	7-6_bin.13	d__Archaea;p__Thermoproteota;c__Nitrososphaeria;o__Nitrososphaerales;f__Nitrosopumilaceae;g__TA-20;s__	blastn_homology	c__Nitrososphaeria	g__TA-20	o__Nitrososphaerales
8-3_NODE_804	8-3_bin.3	d__Bacteria;p__Patescibacteria;c__Paceibacteria;o__UBA9983_A;f__UBA2103;g__C7867-001;s__	blastn_homology	c__Paceibacteria	g__C7867-001	o__UBA9983_A
2-56_NODE_3075	2-4_bin.4	d__Bacteria;p__Bacteroidota;c__Bacteroidia;o__Chitinophagales;f__Chitinophagaceae;g__Lacibacter;s__	blastn_homology	c__Bacteroidia	g__Lacibacter	o__Chitinophagales
8-4_NODE_825	8-5_bin.4	d__Bacteria;p__Proteobacteria;c__Alphaproteobacteria;o__Rhizobiales;f__Xanthobacteraceae;g__Z2-YC6860;s__	blastn_homology	c__Alphaproteobacteria	g__Z2-YC6860	o__Rhizobiales
5-5_NODE_3142	4-6_bin.10	d__Bacteria;p__Proteobacteria;c__Gammaproteobacteria;o__Xanthomonadales;f__Xanthomonadaceae;g__Arenimonas;s__	blastn_homology	c__Gammaproteobacteria	g__Arenimonas	o__Xanthomonadales
1-4_NODE_362	1-4_bin.15	d__Bacteria;p__Proteobacteria;c__Gammaproteobacteria;o__Burkholderiales;f__Burkholderiaceae;g__Ramlibacter;s__	blastn_homology	c__Gammaproteobacteria	g__Ramlibacter	o__Burkholderiales
2-56_NODE_1224	2-56_bin.6	d__Bacteria;p__Verrucomicrobiota;c__Verrucomicrobiae;o__Pedosphaerales;f__;g__;s__	blastn_homology	c__Verrucomicrobiae	g__	o__Pedosphaerales
6-2_NODE_313	1-8_bin.28	d__Bacteria;p__Actinobacteriota;c__Actinomycetia;o__Propionibacteriales;f__Nocardioidaceae;g__Nocardioides;s__	blastn_homology	c__Actinomycetia	g__Nocardioides	o__Propionibacteriales
8-4_NODE_1042	6-2_bin.17	d__Bacteria;p__Proteobacteria;c__Gammaproteobacteria;o__Burkholderiales;f__SG8-40;g__JACQAP01;s__	blastn_homology	c__Gammaproteobacteria	g__JACQAP01	o__Burkholderiales
7-1_NODE_1465	7-1_bin.4	d__Bacteria;p__Gemmatimonadota;c__Gemmatimonadetes;o__Gemmatimonadales;f__Gemmatimonadaceae;g__UBA4720;s__	blastn_homology	c__Gemmatimonadetes	g__UBA4720	o__Gemmatimonadales
8-3_NODE_118	8-3_bin.3	d__Bacteria;p__Patescibacteria;c__Paceibacteria;o__UBA9983_A;f__UBA2103;g__C7867-001;s__	blastn_homology	c__Paceibacteria	g__C7867-001	o__UBA9983_A
8-5_NODE_310	8-5_bin.14	d__Bacteria;p__Gemmatimonadota;c__Gemmatimonadetes;o__Gemmatimonadales;f__Gemmatimonadaceae;g__JABWBJ01;s__	blastn_homology	c__Gemmatimonadetes	g__JABWBJ01	o__Gemmatimonadales
1-4_NODE_962	1-4_bin.24	d__Bacteria;p__Verrucomicrobiota;c__Verrucomicrobiae;o__Opitutales;f__Opitutaceae;g__ER46;s__	blastn_homology	c__Verrucomicrobiae	g__ER46	o__Opitutales
7-6_NODE_1890	8-3_bin.3	d__Bacteria;p__Patescibacteria;c__Paceibacteria;o__UBA9983_A;f__UBA2103;g__C7867-001;s__	blastn_homology	c__Paceibacteria	g__C7867-001	o__UBA9983_A
6-4_NODE_3586	6-4_bin.4	d__Bacteria;p__Acidobacteriota;c__Acidobacteriae;o__Acidobacteriales;f__DSPA01;g__DSPA01;s__	blastn_homology	c__Acidobacteriae	g__DSPA01	o__Acidobacteriales
7-1_NODE_470	7-1_bin.4	d__Bacteria;p__Gemmatimonadota;c__Gemmatimonadetes;o__Gemmatimonadales;f__Gemmatimonadaceae;g__UBA4720;s__	blastn_homology	c__Gemmatimonadetes	g__UBA4720	o__Gemmatimonadales
3-4_NODE_1	3-4_bin.12	d__Bacteria;p__Bacteroidota;c__Bacteroidia;o__Flavobacteriales;f__Flavobacteriaceae;g__Flavobacterium;s__	blastn_homology	c__Bacteroidia	g__Flavobacterium	o__Flavobacteriales
3-4_NODE_5	1-4_bin.5	d__Bacteria;p__Actinobacteriota;c__Actinomycetia;o__Actinomycetales;f__Micrococcaceae;g__Arthrobacter_I;s__	blastn_homology	c__Actinomycetia	g__Arthrobacter_I	o__Actinomycetales
3-4_NODE_2669	3-26_bin.4	d__Bacteria;p__Actinobacteriota;c__Actinomycetia;o__Propionibacteriales;f__Nocardioidaceae;g__Marmoricola;s__	blastn_homology	c__Actinomycetia	g__Marmoricola	o__Propionibacteriales
1-8_NODE_38	2-66_bin.27	d__Bacteria;p__Actinobacteriota;c__Actinomycetia;o__Propionibacteriales;f__Nocardioidaceae;g__Nocardioides;s__	blastn_homology	c__Actinomycetia	g__Nocardioides	o__Propionibacteriales
1-8_NODE_38	1-8_bin.12	d__Bacteria;p__Actinobacteriota;c__Actinomycetia;o__Actinomycetales;f__Micrococcaceae;g__Pseudarthrobacter;s__Pseudarthrobacter sulfonivorans_A	blastn_homology	c__Actinomycetia	g__Pseudarthrobacter	o__Actinomycetales
8-4_NODE_3092	8-5_bin.7	d__Bacteria;p__Acidobacteriota;c__Acidobacteriae;o__Acidoferrales;f__UBA7541;g__Acidoferrum;s__	blastn_homology	c__Acidobacteriae	g__Acidoferrum	o__Acidoferrales
6-4_NODE_4130	6-4_bin.4	d__Bacteria;p__Acidobacteriota;c__Acidobacteriae;o__Acidobacteriales;f__DSPA01;g__DSPA01;s__	blastn_homology	c__Acidobacteriae	g__DSPA01	o__Acidobacteriales
8-3_NODE_3330	8-3_bin.3	d__Bacteria;p__Patescibacteria;c__Paceibacteria;o__UBA9983_A;f__UBA2103;g__C7867-001;s__	blastn_homology	c__Paceibacteria	g__C7867-001	o__UBA9983_A
1-8_NODE_2506	1-8_bin.28	d__Bacteria;p__Actinobacteriota;c__Actinomycetia;o__Propionibacteriales;f__Nocardioidaceae;g__Nocardioides;s__	blastn_homology	c__Actinomycetia	g__Nocardioides	o__Propionibacteriales
6-2_NODE_292	6-4_bin.4	d__Bacteria;p__Acidobacteriota;c__Acidobacteriae;o__Acidobacteriales;f__DSPA01;g__DSPA01;s__	blastn_homology	c__Acidobacteriae	g__DSPA01	o__Acidobacteriales
6-2_NODE_292	7-2_bin.13	d__Bacteria;p__Methylomirabilota;c__Methylomirabilia;o__Rokubacteriales;f__CSP1-6;g__;s__	blastn_homology	c__Methylomirabilia	g__	o__Rokubacteriales
4-2_NODE_986	4-2_bin.12	d__Bacteria;p__Acidobacteriota;c__Acidobacteriae;o__Acidobacteriales;f__Acidobacteriaceae;g__Terracidiphilus;s__	blastn_homology	c__Acidobacteriae	g__Terracidiphilus	o__Acidobacteriales
3-26_NODE_1726	3-26_bin.4	d__Bacteria;p__Actinobacteriota;c__Actinomycetia;o__Propionibacteriales;f__Nocardioidaceae;g__Marmoricola;s__	blastn_homology	c__Actinomycetia	g__Marmoricola	o__Propionibacteriales
6-4_NODE_5933	8-3_bin.3	d__Bacteria;p__Patescibacteria;c__Paceibacteria;o__UBA9983_A;f__UBA2103;g__C7867-001;s__	blastn_homology	c__Paceibacteria	g__C7867-001	o__UBA9983_A
2-56_NODE_362	2-56_bin.29	d__Bacteria;p__Proteobacteria;c__Alphaproteobacteria;o__Sphingomonadales;f__Sphingomonadaceae;g__UBA1936;s__	blastn_homology	c__Alphaproteobacteria	g__UBA1936	o__Sphingomonadales
5-6_NODE_1454	5-7_bin.26	d__Bacteria;p__Proteobacteria;c__Gammaproteobacteria;o__Steroidobacterales;f__Steroidobacteraceae;g__Bog-1198;s__	blastn_homology	c__Gammaproteobacteria	g__Bog-1198	o__Steroidobacterales
7-2_NODE_761	5-6_bin.9	d__Bacteria;p__Proteobacteria;c__Gammaproteobacteria;o__Steroidobacterales;f__Steroidobacteraceae;g__Bog-1198;s__	blastn_homology	c__Gammaproteobacteria	g__Bog-1198	o__Steroidobacterales
8-4_NODE_1661	8-3_bin.3	d__Bacteria;p__Patescibacteria;c__Paceibacteria;o__UBA9983_A;f__UBA2103;g__C7867-001;s__	blastn_homology	c__Paceibacteria	g__C7867-001	o__UBA9983_A
1-1_NODE_400	1-1_bin.5	d__Bacteria;p__RBG-13-61-14;c__;o__;f__;g__;s__	blastn_homology	c__	g__	o__
2-66_NODE_124	2-66_bin.9	d__Bacteria;p__Nitrospirota;c__Nitrospiria;o__Nitrospirales;f__Nitrospiraceae;g__Palsa-1315;s__	blastn_homology	c__Nitrospiria	g__Palsa-1315	o__Nitrospirales
2-4_NODE_286	3-4_bin.6	d__Bacteria;p__Zixibacteria;c__MSB-5A5;o__DSPP01;f__WJJR01;g__JACQFV01;s__	blastn_homology	c__MSB-5A5	g__JACQFV01	o__DSPP01
1-4_NODE_476	7-1_bin.3	d__Bacteria;p__Gemmatimonadota;c__Gemmatimonadetes;o__Gemmatimonadales;f__JACORV01;g__;s__	blastn_homology	c__Gemmatimonadetes	g__	o__Gemmatimonadales
1-4_NODE_183	1-4_bin.16	d__Bacteria;p__Proteobacteria;c__Alphaproteobacteria;o__Caulobacterales;f__Hyphomonadaceae;g__UBA7672;s__	blastn_homology	c__Alphaproteobacteria	g__UBA7672	o__Caulobacterales
1-4_NODE_183	1-4_bin.15	d__Bacteria;p__Proteobacteria;c__Gammaproteobacteria;o__Burkholderiales;f__Burkholderiaceae;g__Ramlibacter;s__	blastn_homology	c__Gammaproteobacteria	g__Ramlibacter	o__Burkholderiales
6-2_NODE_133	2-4_bin.4	d__Bacteria;p__Bacteroidota;c__Bacteroidia;o__Chitinophagales;f__Chitinophagaceae;g__Lacibacter;s__	blastn_homology	c__Bacteroidia	g__Lacibacter	o__Chitinophagales
1-4_NODE_1998	1-4_bin.15	d__Bacteria;p__Proteobacteria;c__Gammaproteobacteria;o__Burkholderiales;f__Burkholderiaceae;g__Ramlibacter;s__	blastn_homology	c__Gammaproteobacteria	g__Ramlibacter	o__Burkholderiales
3-26_NODE_631	2-4_bin.12	d__Bacteria;p__Proteobacteria;c__Gammaproteobacteria;o__Nevskiales;f__Nevskiaceae;g__;s__	blastn_homology	c__Gammaproteobacteria	g__	o__Nevskiales
3-26_NODE_631	2-4_bin.15	d__Bacteria;p__Proteobacteria;c__Gammaproteobacteria;o__REEB76;f__REEB76;g__;s__	blastn_homology	c__Gammaproteobacteria	g__	o__REEB76
7-6_NODE_1399	4-7_bin.6	d__Bacteria;p__Acidobacteriota;c__Acidobacteriae;o__Acidobacteriales;f__SbA1;g__;s__	blastn_homology	c__Acidobacteriae	g__	o__Acidobacteriales
8-3_NODE_373	8-3_bin.3	d__Bacteria;p__Patescibacteria;c__Paceibacteria;o__UBA9983_A;f__UBA2103;g__C7867-001;s__	blastn_homology	c__Paceibacteria	g__C7867-001	o__UBA9983_A
5-7_NODE_1446	7-6_bin.13	d__Archaea;p__Thermoproteota;c__Nitrososphaeria;o__Nitrososphaerales;f__Nitrosopumilaceae;g__TA-20;s__	blastn_homology	c__Nitrososphaeria	g__TA-20	o__Nitrososphaerales
2-4_NODE_1781	5-7_bin.14	d__Bacteria;p__Proteobacteria;c__Gammaproteobacteria;o__Burkholderiales;f__Burkholderiaceae;g__CAIMXF01;s__	blastn_homology	c__Gammaproteobacteria	g__CAIMXF01	o__Burkholderiales
8-3_NODE_1310	8-3_bin.3	d__Bacteria;p__Patescibacteria;c__Paceibacteria;o__UBA9983_A;f__UBA2103;g__C7867-001;s__	blastn_homology	c__Paceibacteria	g__C7867-001	o__UBA9983_A
6-3_NODE_1773	5-6_bin.9	d__Bacteria;p__Proteobacteria;c__Gammaproteobacteria;o__Steroidobacterales;f__Steroidobacteraceae;g__Bog-1198;s__	blastn_homology	c__Gammaproteobacteria	g__Bog-1198	o__Steroidobacterales
8-3_NODE_3760	8-3_bin.3	d__Bacteria;p__Patescibacteria;c__Paceibacteria;o__UBA9983_A;f__UBA2103;g__C7867-001;s__	blastn_homology	c__Paceibacteria	g__C7867-001	o__UBA9983_A
6-4_NODE_401	6-4_bin.15	d__Bacteria;p__Actinobacteriota;c__Thermoleophilia;o__Solirubrobacterales;f__Solirubrobacteraceae;g__Palsa-744;s__	blastn_homology	c__Thermoleophilia	g__Palsa-744	o__Solirubrobacterales
8-5_NODE_294	8-3_bin.3	d__Bacteria;p__Patescibacteria;c__Paceibacteria;o__UBA9983_A;f__UBA2103;g__C7867-001;s__	blastn_homology	c__Paceibacteria	g__C7867-001	o__UBA9983_A
5-7_NODE_1628	5-7_bin.26	d__Bacteria;p__Proteobacteria;c__Gammaproteobacteria;o__Steroidobacterales;f__Steroidobacteraceae;g__Bog-1198;s__	blastn_homology	c__Gammaproteobacteria	g__Bog-1198	o__Steroidobacterales
8-3_NODE_1167	8-3_bin.3	d__Bacteria;p__Patescibacteria;c__Paceibacteria;o__UBA9983_A;f__UBA2103;g__C7867-001;s__	blastn_homology	c__Paceibacteria	g__C7867-001	o__UBA9983_A
5-6_NODE_938	5-6_bin.13	d__Bacteria;p__Acidobacteriota;c__Acidobacteriae;o__Acidobacteriales;f__SbA1;g__JABCYV01;s__	blastn_homology	c__Acidobacteriae	g__JABCYV01	o__Acidobacteriales
8-3_NODE_4914	8-3_bin.3	d__Bacteria;p__Patescibacteria;c__Paceibacteria;o__UBA9983_A;f__UBA2103;g__C7867-001;s__	blastn_homology	c__Paceibacteria	g__C7867-001	o__UBA9983_A
8-5_NODE_817	8-5_bin.11	d__Bacteria;p__Gemmatimonadota;c__Gemmatimonadetes;o__Gemmatimonadales;f__GWC2-71-9;g__JACDDX01;s__	blastn_homology	c__Gemmatimonadetes	g__JACDDX01	o__Gemmatimonadales
7-2_NODE_5	3-4_bin.12	d__Bacteria;p__Bacteroidota;c__Bacteroidia;o__Flavobacteriales;f__Flavobacteriaceae;g__Flavobacterium;s__	blastn_homology	c__Bacteroidia	g__Flavobacterium	o__Flavobacteriales
5-7_NODE_136	5-7_bin.1	d__Bacteria;p__Methylomirabilota;c__Methylomirabilia;o__Rokubacteriales;f__CSP1-6;g__;s__	blastn_homology	c__Methylomirabilia	g__	o__Rokubacteriales
3-26_NODE_995	3-26_bin.9	d__Bacteria;p__Proteobacteria;c__Gammaproteobacteria;o__Burkholderiales;f__Burkholderiaceae;g__JACCZX01;s__	blastn_homology	c__Gammaproteobacteria	g__JACCZX01	o__Burkholderiales
1-1_NODE_663	1-1_bin.5	d__Bacteria;p__RBG-13-61-14;c__;o__;f__;g__;s__	blastn_homology	c__	g__	o__
4-2_NODE_1515	5-6_bin.7	d__Bacteria;p__Patescibacteria;c__Paceibacteria;o__UBA9983_A;f__UBA9973;g__UBA9973;s__	blastn_homology	c__Paceibacteria	g__UBA9973	o__UBA9983_A
7-1_NODE_3223	7-1_bin.4	d__Bacteria;p__Gemmatimonadota;c__Gemmatimonadetes;o__Gemmatimonadales;f__Gemmatimonadaceae;g__UBA4720;s__	blastn_homology	c__Gemmatimonadetes	g__UBA4720	o__Gemmatimonadales
3-26_NODE_1401	3-4_bin.15	d__Bacteria;p__Actinobacteriota;c__Actinomycetia;o__Propionibacteriales;f__Nocardioidaceae;g__Marmoricola;s__	blastn_homology	c__Actinomycetia	g__Marmoricola	o__Propionibacteriales
4-2_NODE_1731	5-6_bin.7	d__Bacteria;p__Patescibacteria;c__Paceibacteria;o__UBA9983_A;f__UBA9973;g__UBA9973;s__	blastn_homology	c__Paceibacteria	g__UBA9973	o__UBA9983_A
6-4_NODE_481	6-4_bin.9	d__Bacteria;p__Proteobacteria;c__Gammaproteobacteria;o__Steroidobacterales;f__Steroidobacteraceae;g__13-2-20CM-66-19;s__	blastn_homology	c__Gammaproteobacteria	g__13-2-20CM-66-19	o__Steroidobacterales
5-6_NODE_1831	5-6_bin.7	d__Bacteria;p__Patescibacteria;c__Paceibacteria;o__UBA9983_A;f__UBA9973;g__UBA9973;s__	blastn_homology	c__Paceibacteria	g__UBA9973	o__UBA9983_A
1-4_NODE_467	1-4_bin.1	d__Bacteria;p__Proteobacteria;c__Gammaproteobacteria;o__Burkholderiales;f__Thiobacillaceae;g__;s__	blastn_homology	c__Gammaproteobacteria	g__	o__Burkholderiales
2-56_NODE_234	2-4_bin.15	d__Bacteria;p__Proteobacteria;c__Gammaproteobacteria;o__REEB76;f__REEB76;g__;s__	blastn_homology	c__Gammaproteobacteria	g__	o__REEB76
4-6_NODE_335	4-6_bin.15	d__Bacteria;p__Proteobacteria;c__Gammaproteobacteria;o__Xanthomonadales;f__Xanthomonadaceae;g__Arenimonas;s__	blastn_homology	c__Gammaproteobacteria	g__Arenimonas	o__Xanthomonadales
7-1_NODE_302	6-2_bin.17	d__Bacteria;p__Proteobacteria;c__Gammaproteobacteria;o__Burkholderiales;f__SG8-40;g__JACQAP01;s__	blastn_homology	c__Gammaproteobacteria	g__JACQAP01	o__Burkholderiales
2-4_NODE_3561	2-4_bin.10	d__Bacteria;p__Verrucomicrobiota;c__Verrucomicrobiae;o__Opitutales;f__Opitutaceae;g__Lacunisphaera;s__	blastn_homology	c__Verrucomicrobiae	g__Lacunisphaera	o__Opitutales
6-2_NODE_2879	8-3_bin.3	d__Bacteria;p__Patescibacteria;c__Paceibacteria;o__UBA9983_A;f__UBA2103;g__C7867-001;s__	blastn_homology	c__Paceibacteria	g__C7867-001	o__UBA9983_A
7-1_NODE_649	7-1_bin.4	d__Bacteria;p__Gemmatimonadota;c__Gemmatimonadetes;o__Gemmatimonadales;f__Gemmatimonadaceae;g__UBA4720;s__	blastn_homology	c__Gemmatimonadetes	g__UBA4720	o__Gemmatimonadales
2-4_NODE_1237	2-4_bin.28	d__Bacteria;p__Verrucomicrobiota;c__Verrucomicrobiae;o__Pedosphaerales;f__;g__;s__	blastn_homology	c__Verrucomicrobiae	g__	o__Pedosphaerales
7-1_NODE_1827	7-1_bin.4	d__Bacteria;p__Gemmatimonadota;c__Gemmatimonadetes;o__Gemmatimonadales;f__Gemmatimonadaceae;g__UBA4720;s__	blastn_homology	c__Gemmatimonadetes	g__UBA4720	o__Gemmatimonadales
3-4_NODE_1355	3-4_bin.2	d__Bacteria;p__Proteobacteria;c__Gammaproteobacteria;o__Burkholderiales;f__Burkholderiaceae;g__CAIMXF01;s__	blastn_homology	c__Gammaproteobacteria	g__CAIMXF01	o__Burkholderiales
5-6_NODE_1179	5-6_bin.9	d__Bacteria;p__Proteobacteria;c__Gammaproteobacteria;o__Steroidobacterales;f__Steroidobacteraceae;g__Bog-1198;s__	blastn_homology	c__Gammaproteobacteria	g__Bog-1198	o__Steroidobacterales
2-4_NODE_2170	2-4_bin.16	d__Bacteria;p__Chloroflexota;c__Limnocylindria;o__QHBO01;f__QHBO01;g__;s__	blastn_homology	c__Limnocylindria	g__	o__QHBO01
2-56_NODE_1293	2-56_bin.13	d__Bacteria;p__Proteobacteria;c__Gammaproteobacteria;o__Acidiferrobacterales;f__Sulfurifustaceae;g__Sulfuricaulis;s__	blastn_homology	c__Gammaproteobacteria	g__Sulfuricaulis	o__Acidiferrobacterales
5-7_NODE_1406	4-7_bin.6	d__Bacteria;p__Acidobacteriota;c__Acidobacteriae;o__Acidobacteriales;f__SbA1;g__;s__	blastn_homology	c__Acidobacteriae	g__	o__Acidobacteriales
4-7_NODE_3233	4-7_bin.3	d__Bacteria;p__Chloroflexota;c__Limnocylindria;o__Limnocylindrales;f__CSP1-4;g__Chersky-267;s__	blastn_homology	c__Limnocylindria	g__Chersky-267	o__Limnocylindrales
6-3_NODE_774	6-3_bin.3	d__Bacteria;p__Actinobacteriota;c__UBA4738;o__UBA4738;f__HRBIN12;g__AC-51;s__	blastn_homology	c__UBA4738	g__AC-51	o__UBA4738
8-3_NODE_60	8-3_bin.3	d__Bacteria;p__Patescibacteria;c__Paceibacteria;o__UBA9983_A;f__UBA2103;g__C7867-001;s__	blastn_homology	c__Paceibacteria	g__C7867-001	o__UBA9983_A
8-5_NODE_498	8-5_bin.4	d__Bacteria;p__Proteobacteria;c__Alphaproteobacteria;o__Rhizobiales;f__Xanthobacteraceae;g__Z2-YC6860;s__	blastn_homology	c__Alphaproteobacteria	g__Z2-YC6860	o__Rhizobiales
1-4_NODE_13	1-4_bin.5	d__Bacteria;p__Actinobacteriota;c__Actinomycetia;o__Actinomycetales;f__Micrococcaceae;g__Arthrobacter_I;s__	blastn_homology	c__Actinomycetia	g__Arthrobacter_I	o__Actinomycetales
2-56_NODE_656	2-56_bin.4	d__Bacteria;p__Nitrospirota;c__Nitrospiria;o__2-01-FULL-66-17;f__2-01-FULL-66-17;g__;s__	blastn_homology	c__Nitrospiria	g__	o__2-01-FULL-66-17
6-3_NODE_2239	8-3_bin.3	d__Bacteria;p__Patescibacteria;c__Paceibacteria;o__UBA9983_A;f__UBA2103;g__C7867-001;s__	blastn_homology	c__Paceibacteria	g__C7867-001	o__UBA9983_A
3-26_NODE_751	3-26_bin.15	d__Bacteria;p__Acidobacteriota;c__Vicinamibacteria;o__Vicinamibacterales;f__SCN-69-37;g__SYFT01;s__	blastn_homology	c__Vicinamibacteria	g__SYFT01	o__Vicinamibacterales
1-8_NODE_1257	1-8_bin.23	d__Bacteria;p__Actinobacteriota;c__UBA4738;o__AC-67;f__AC-67;g__;s__	blastn_homology	c__UBA4738	g__	o__AC-67
4-7_NODE_77	5-7_bin.1	d__Bacteria;p__Methylomirabilota;c__Methylomirabilia;o__Rokubacteriales;f__CSP1-6;g__;s__	blastn_homology	c__Methylomirabilia	g__	o__Rokubacteriales
7-1_NODE_1121	7-1_bin.2	d__Bacteria;p__Acidobacteriota;c__Vicinamibacteria;o__Fen-336;f__Fen-336;g__CADEEV01;s__	blastn_homology	c__Vicinamibacteria	g__CADEEV01	o__Fen-336
8-3_NODE_2052	8-3_bin.3	d__Bacteria;p__Patescibacteria;c__Paceibacteria;o__UBA9983_A;f__UBA2103;g__C7867-001;s__	blastn_homology	c__Paceibacteria	g__C7867-001	o__UBA9983_A
7-1_NODE_3421	6-3_bin.3	d__Bacteria;p__Actinobacteriota;c__UBA4738;o__UBA4738;f__HRBIN12;g__AC-51;s__	blastn_homology	c__UBA4738	g__AC-51	o__UBA4738
8-3_NODE_1062	8-3_bin.4	d__Archaea;p__Thermoplasmatota;c__Thermoplasmata;o__UBA184;f__UBA184;g__UBA184;s__	blastn_homology	c__Thermoplasmata	g__UBA184	o__UBA184
3-5_NODE_1480	4-6_bin.10	d__Bacteria;p__Proteobacteria;c__Gammaproteobacteria;o__Xanthomonadales;f__Xanthomonadaceae;g__Arenimonas;s__	blastn_homology	c__Gammaproteobacteria	g__Arenimonas	o__Xanthomonadales
8-3_NODE_4326	8-3_bin.3	d__Bacteria;p__Patescibacteria;c__Paceibacteria;o__UBA9983_A;f__UBA2103;g__C7867-001;s__	blastn_homology	c__Paceibacteria	g__C7867-001	o__UBA9983_A
8-4_NODE_2414	8-3_bin.3	d__Bacteria;p__Patescibacteria;c__Paceibacteria;o__UBA9983_A;f__UBA2103;g__C7867-001;s__	blastn_homology	c__Paceibacteria	g__C7867-001	o__UBA9983_A
5-5_NODE_574	5-7_bin.13	d__Bacteria;p__Proteobacteria;c__Alphaproteobacteria;o__Sphingomonadales;f__Sphingomonadaceae;g__Allosphingosinicella;s__	blastn_homology	c__Alphaproteobacteria	g__Allosphingosinicella	o__Sphingomonadales
8-3_NODE_1647	8-3_bin.3	d__Bacteria;p__Patescibacteria;c__Paceibacteria;o__UBA9983_A;f__UBA2103;g__C7867-001;s__	blastn_homology	c__Paceibacteria	g__C7867-001	o__UBA9983_A
6-2_NODE_229	5-7_bin.1	d__Bacteria;p__Methylomirabilota;c__Methylomirabilia;o__Rokubacteriales;f__CSP1-6;g__;s__	blastn_homology	c__Methylomirabilia	g__	o__Rokubacteriales
8-4_NODE_435	8-4_bin.3	d__Bacteria;p__Desulfobacterota_B;c__Binatia;o__Bin18;f__Bin18;g__;s__	blastn_homology	c__Binatia	g__	o__Bin18
5-6_NODE_3273	7-2_bin.13	d__Bacteria;p__Methylomirabilota;c__Methylomirabilia;o__Rokubacteriales;f__CSP1-6;g__;s__	blastn_homology	c__Methylomirabilia	g__	o__Rokubacteriales
6-3_NODE_2281	4-6_bin.2	d__Bacteria;p__Proteobacteria;c__Gammaproteobacteria;o__Burkholderiales;f__SG8-39;g__;s__	blastn_homology	c__Gammaproteobacteria	g__	o__Burkholderiales
8-3_NODE_3611	8-3_bin.3	d__Bacteria;p__Patescibacteria;c__Paceibacteria;o__UBA9983_A;f__UBA2103;g__C7867-001;s__	blastn_homology	c__Paceibacteria	g__C7867-001	o__UBA9983_A
6-4_NODE_1871	4-7_bin.3	d__Bacteria;p__Chloroflexota;c__Limnocylindria;o__Limnocylindrales;f__CSP1-4;g__Chersky-267;s__	blastn_homology	c__Limnocylindria	g__Chersky-267	o__Limnocylindrales
7-6_NODE_3695	7-2_bin.2	d__Bacteria;p__Tectomicrobia;c__Entotheonellia;o__Entotheonellales;f__Entotheonellaceae;g__SXND01;s__	blastn_homology	c__Entotheonellia	g__SXND01	o__Entotheonellales
6-3_NODE_218	5-7_bin.1	d__Bacteria;p__Methylomirabilota;c__Methylomirabilia;o__Rokubacteriales;f__CSP1-6;g__;s__	blastn_homology	c__Methylomirabilia	g__	o__Rokubacteriales
2-4_NODE_355	2-4_bin.28	d__Bacteria;p__Verrucomicrobiota;c__Verrucomicrobiae;o__Pedosphaerales;f__;g__;s__	blastn_homology	c__Verrucomicrobiae	g__	o__Pedosphaerales
5-7_NODE_1484	4-6_bin.20	d__Bacteria;p__Proteobacteria;c__Gammaproteobacteria;o__Steroidobacterales;f__Steroidobacteraceae;g__FEN-1191;s__	blastn_homology	c__Gammaproteobacteria	g__FEN-1191	o__Steroidobacterales
4-6_NODE_37	5-7_bin.1	d__Bacteria;p__Methylomirabilota;c__Methylomirabilia;o__Rokubacteriales;f__CSP1-6;g__;s__	blastn_homology	c__Methylomirabilia	g__	o__Rokubacteriales
8-4_NODE_403	8-4_bin.3	d__Bacteria;p__Desulfobacterota_B;c__Binatia;o__Bin18;f__Bin18;g__;s__	blastn_homology	c__Binatia	g__	o__Bin18
8-3_NODE_945	8-3_bin.3	d__Bacteria;p__Patescibacteria;c__Paceibacteria;o__UBA9983_A;f__UBA2103;g__C7867-001;s__	blastn_homology	c__Paceibacteria	g__C7867-001	o__UBA9983_A
7-2_NODE_174	8-3_bin.3	d__Bacteria;p__Patescibacteria;c__Paceibacteria;o__UBA9983_A;f__UBA2103;g__C7867-001;s__	blastn_homology	c__Paceibacteria	g__C7867-001	o__UBA9983_A
7-1_NODE_1329	7-1_bin.14	d__Bacteria;p__Proteobacteria;c__Gammaproteobacteria;o__Burkholderiales;f__Burkholderiaceae;g__Massilia;s__	blastn_homology	c__Gammaproteobacteria	g__Massilia	o__Burkholderiales
8-3_NODE_3177	8-3_bin.3	d__Bacteria;p__Patescibacteria;c__Paceibacteria;o__UBA9983_A;f__UBA2103;g__C7867-001;s__	blastn_homology	c__Paceibacteria	g__C7867-001	o__UBA9983_A
5-5_NODE_156	7-2_bin.17	d__Bacteria;p__Proteobacteria;c__Gammaproteobacteria;o__Pseudomonadales;f__Pseudomonadaceae;g__Pseudomonas_E;s__	blastn_homology	c__Gammaproteobacteria	g__Pseudomonas_E	o__Pseudomonadales
5-5_NODE_156	7-6_bin.12	d__Bacteria;p__Proteobacteria;c__Gammaproteobacteria;o__Burkholderiales;f__Burkholderiaceae;g__Collimonas;s__	blastn_homology	c__Gammaproteobacteria	g__Collimonas	o__Burkholderiales
2-56_NODE_795	2-56_bin.13	d__Bacteria;p__Proteobacteria;c__Gammaproteobacteria;o__Acidiferrobacterales;f__Sulfurifustaceae;g__Sulfuricaulis;s__	blastn_homology	c__Gammaproteobacteria	g__Sulfuricaulis	o__Acidiferrobacterales
8-3_NODE_1048	7-6_bin.2	d__Bacteria;p__Proteobacteria;c__Gammaproteobacteria;o__Burkholderiales;f__Burkholderiaceae;g__;s__	blastn_homology	c__Gammaproteobacteria	g__	o__Burkholderiales
2-4_NODE_416	3-4_bin.4	d__Bacteria;p__Proteobacteria;c__Alphaproteobacteria;o__Rhizobiales;f__Aestuariivirgaceae;g__Aestuariivirga;s__	blastn_homology	c__Alphaproteobacteria	g__Aestuariivirga	o__Rhizobiales
2-4_NODE_416	2-4_bin.2	d__Bacteria;p__Nitrospirota;c__Nitrospiria;o__Nitrospirales;f__Nitrospiraceae;g__Nitrospira_F;s__Nitrospira_F sp002083565	blastn_homology	c__Nitrospiria	g__Nitrospira_F	o__Nitrospirales
2-4_NODE_416	4-6_bin.5	d__Bacteria;p__Acidobacteriota;c__Acidobacteriae;o__Acidobacteriales;f__SbA1;g__QIAJ01;s__	blastn_homology	c__Acidobacteriae	g__QIAJ01	o__Acidobacteriales
7-1_NODE_3474	7-1_bin.4	d__Bacteria;p__Gemmatimonadota;c__Gemmatimonadetes;o__Gemmatimonadales;f__Gemmatimonadaceae;g__UBA4720;s__	blastn_homology	c__Gemmatimonadetes	g__UBA4720	o__Gemmatimonadales
2-56_NODE_751	2-56_bin.12	d__Bacteria;p__Chloroflexota;c__Limnocylindria;o__Limnocylindrales;f__CSP1-4;g__UBA5189;s__	blastn_homology	c__Limnocylindria	g__UBA5189	o__Limnocylindrales
6-2_NODE_3683	4-7_bin.3	d__Bacteria;p__Chloroflexota;c__Limnocylindria;o__Limnocylindrales;f__CSP1-4;g__Chersky-267;s__	blastn_homology	c__Limnocylindria	g__Chersky-267	o__Limnocylindrales
1-1_NODE_785	1-1_bin.23	d__Bacteria;p__Proteobacteria;c__Gammaproteobacteria;o__SG8-11;f__SG8-11;g__UBA6921;s__	blastn_homology	c__Gammaproteobacteria	g__UBA6921	o__SG8-11
7-2_NODE_352	7-2_bin.5	d__Bacteria;p__Acidobacteriota;c__Acidobacteriae;o__Acidobacteriales;f__Acidobacteriaceae;g__Edaphobacter;s__	blastn_homology	c__Acidobacteriae	g__Edaphobacter	o__Acidobacteriales
4-7_NODE_4726	5-7_bin.14	d__Bacteria;p__Proteobacteria;c__Gammaproteobacteria;o__Burkholderiales;f__Burkholderiaceae;g__CAIMXF01;s__	blastn_homology	c__Gammaproteobacteria	g__CAIMXF01	o__Burkholderiales
8-3_NODE_498	8-4_bin.8	d__Bacteria;p__Proteobacteria;c__Gammaproteobacteria;o__Burkholderiales;f__Burkholderiaceae;g__Albitalea;s__	blastn_homology	c__Gammaproteobacteria	g__Albitalea	o__Burkholderiales
5-5_NODE_4890	5-6_bin.12	d__Bacteria;p__Proteobacteria;c__Gammaproteobacteria;o__Steroidobacterales;f__Steroidobacteraceae;g__FEN-1191;s__	blastn_homology	c__Gammaproteobacteria	g__FEN-1191	o__Steroidobacterales
8-5_NODE_999	4-7_bin.3	d__Bacteria;p__Chloroflexota;c__Limnocylindria;o__Limnocylindrales;f__CSP1-4;g__Chersky-267;s__	blastn_homology	c__Limnocylindria	g__Chersky-267	o__Limnocylindrales
6-4_NODE_2935	2-56_bin.13	d__Bacteria;p__Proteobacteria;c__Gammaproteobacteria;o__Acidiferrobacterales;f__Sulfurifustaceae;g__Sulfuricaulis;s__	blastn_homology	c__Gammaproteobacteria	g__Sulfuricaulis	o__Acidiferrobacterales
6-2_NODE_7824	4-7_bin.3	d__Bacteria;p__Chloroflexota;c__Limnocylindria;o__Limnocylindrales;f__CSP1-4;g__Chersky-267;s__	blastn_homology	c__Limnocylindria	g__Chersky-267	o__Limnocylindrales
6-4_NODE_3206	6-4_bin.4	d__Bacteria;p__Acidobacteriota;c__Acidobacteriae;o__Acidobacteriales;f__DSPA01;g__DSPA01;s__	blastn_homology	c__Acidobacteriae	g__DSPA01	o__Acidobacteriales
6-3_NODE_4119	8-3_bin.3	d__Bacteria;p__Patescibacteria;c__Paceibacteria;o__UBA9983_A;f__UBA2103;g__C7867-001;s__	blastn_homology	c__Paceibacteria	g__C7867-001	o__UBA9983_A
2-4_NODE_1319	2-4_bin.1	d__Bacteria;p__Acidobacteriota;c__Blastocatellia;o__Pyrinomonadales;f__Pyrinomonadaceae;g__OLB17;s__	blastn_homology	c__Blastocatellia	g__OLB17	o__Pyrinomonadales
8-3_NODE_1024	8-3_bin.3	d__Bacteria;p__Patescibacteria;c__Paceibacteria;o__UBA9983_A;f__UBA2103;g__C7867-001;s__	blastn_homology	c__Paceibacteria	g__C7867-001	o__UBA9983_A
7-6_NODE_1426	7-6_bin.4	d__Bacteria;p__Chloroflexota;c__Limnocylindria;o__QHBO01;f__QHBO01;g__CF-167;s__	blastn_homology	c__Limnocylindria	g__CF-167	o__QHBO01
4-6_NODE_526	4-6_bin.5	d__Bacteria;p__Acidobacteriota;c__Acidobacteriae;o__Acidobacteriales;f__SbA1;g__QIAJ01;s__	blastn_homology	c__Acidobacteriae	g__QIAJ01	o__Acidobacteriales
2-4_NODE_335	2-66_bin.15	d__Bacteria;p__Verrucomicrobiota;c__Verrucomicrobiae;o__Pedosphaerales;f__PALSA-1396;g__PALSA-1396;s__	blastn_homology	c__Verrucomicrobiae	g__PALSA-1396	o__Pedosphaerales
5-6_NODE_700	5-6_bin.1	d__Bacteria;p__Methylomirabilota;c__Methylomirabilia;o__Rokubacteriales;f__CSP1-6;g__;s__	blastn_homology	c__Methylomirabilia	g__	o__Rokubacteriales
1-1_NODE_284	1-4_bin.8	d__Bacteria;p__Actinobacteriota;c__Thermoleophilia;o__Solirubrobacterales;f__Solirubrobacteraceae;g__SEOHO-28;s__	blastn_homology	c__Thermoleophilia	g__SEOHO-28	o__Solirubrobacterales
5-6_NODE_525	5-6_bin.15	d__Bacteria;p__Nitrospirota;c__Nitrospiria;o__Nitrospirales;f__Nitrospiraceae;g__Palsa-1315;s__	blastn_homology	c__Nitrospiria	g__Palsa-1315	o__Nitrospirales
8-4_NODE_118	8-4_bin.3	d__Bacteria;p__Desulfobacterota_B;c__Binatia;o__Bin18;f__Bin18;g__;s__	blastn_homology	c__Binatia	g__	o__Bin18
2-56_NODE_2167	2-56_bin.13	d__Bacteria;p__Proteobacteria;c__Gammaproteobacteria;o__Acidiferrobacterales;f__Sulfurifustaceae;g__Sulfuricaulis;s__	blastn_homology	c__Gammaproteobacteria	g__Sulfuricaulis	o__Acidiferrobacterales
5-7_NODE_2159	5-7_bin.13	d__Bacteria;p__Proteobacteria;c__Alphaproteobacteria;o__Sphingomonadales;f__Sphingomonadaceae;g__Allosphingosinicella;s__	blastn_homology	c__Alphaproteobacteria	g__Allosphingosinicella	o__Sphingomonadales
5-7_NODE_2158	5-7_bin.14	d__Bacteria;p__Proteobacteria;c__Gammaproteobacteria;o__Burkholderiales;f__Burkholderiaceae;g__CAIMXF01;s__	blastn_homology	c__Gammaproteobacteria	g__CAIMXF01	o__Burkholderiales
2-56_NODE_773	2-66_bin.19	d__Bacteria;p__Proteobacteria;c__Gammaproteobacteria;o__CAIRSR01;f__CAIRSR01;g__;s__	blastn_homology	c__Gammaproteobacteria	g__	o__CAIRSR01
2-56_NODE_773	2-56_bin.16	d__Bacteria;p__Proteobacteria;c__Gammaproteobacteria;o__Burkholderiales;f__SG8-41;g__UBA5216;s__	blastn_homology	c__Gammaproteobacteria	g__UBA5216	o__Burkholderiales
6-2_NODE_1080	6-3_bin.3	d__Bacteria;p__Actinobacteriota;c__UBA4738;o__UBA4738;f__HRBIN12;g__AC-51;s__	blastn_homology	c__UBA4738	g__AC-51	o__UBA4738
7-1_NODE_2860	7-1_bin.4	d__Bacteria;p__Gemmatimonadota;c__Gemmatimonadetes;o__Gemmatimonadales;f__Gemmatimonadaceae;g__UBA4720;s__	blastn_homology	c__Gemmatimonadetes	g__UBA4720	o__Gemmatimonadales
6-3_NODE_2563	8-3_bin.3	d__Bacteria;p__Patescibacteria;c__Paceibacteria;o__UBA9983_A;f__UBA2103;g__C7867-001;s__	blastn_homology	c__Paceibacteria	g__C7867-001	o__UBA9983_A
4-6_NODE_979	4-6_bin.5	d__Bacteria;p__Acidobacteriota;c__Acidobacteriae;o__Acidobacteriales;f__SbA1;g__QIAJ01;s__	blastn_homology	c__Acidobacteriae	g__QIAJ01	o__Acidobacteriales
2-56_NODE_3388	1-1_bin.8	d__Bacteria;p__Actinobacteriota;c__Acidimicrobiia;o__Acidimicrobiales;f__CADCTF01;g__;s__	blastn_homology	c__Acidimicrobiia	g__	o__Acidimicrobiales
8-3_NODE_88	8-4_bin.3	d__Bacteria;p__Desulfobacterota_B;c__Binatia;o__Bin18;f__Bin18;g__;s__	blastn_homology	c__Binatia	g__	o__Bin18
6-3_NODE_6219	8-3_bin.3	d__Bacteria;p__Patescibacteria;c__Paceibacteria;o__UBA9983_A;f__UBA2103;g__C7867-001;s__	blastn_homology	c__Paceibacteria	g__C7867-001	o__UBA9983_A
5-6_NODE_886	5-6_bin.13	d__Bacteria;p__Acidobacteriota;c__Acidobacteriae;o__Acidobacteriales;f__SbA1;g__JABCYV01;s__	blastn_homology	c__Acidobacteriae	g__JABCYV01	o__Acidobacteriales
4-7_NODE_652	8-5_bin.14	d__Bacteria;p__Gemmatimonadota;c__Gemmatimonadetes;o__Gemmatimonadales;f__Gemmatimonadaceae;g__JABWBJ01;s__	blastn_homology	c__Gemmatimonadetes	g__JABWBJ01	o__Gemmatimonadales
6-3_NODE_984	6-3_bin.3	d__Bacteria;p__Actinobacteriota;c__UBA4738;o__UBA4738;f__HRBIN12;g__AC-51;s__	blastn_homology	c__UBA4738	g__AC-51	o__UBA4738
5-6_NODE_883	5-6_bin.7	d__Bacteria;p__Patescibacteria;c__Paceibacteria;o__UBA9983_A;f__UBA9973;g__UBA9973;s__	blastn_homology	c__Paceibacteria	g__UBA9973	o__UBA9983_A
5-7_NODE_32	8-3_bin.3	d__Bacteria;p__Patescibacteria;c__Paceibacteria;o__UBA9983_A;f__UBA2103;g__C7867-001;s__	blastn_homology	c__Paceibacteria	g__C7867-001	o__UBA9983_A
7-1_NODE_2267	7-1_bin.4	d__Bacteria;p__Gemmatimonadota;c__Gemmatimonadetes;o__Gemmatimonadales;f__Gemmatimonadaceae;g__UBA4720;s__	blastn_homology	c__Gemmatimonadetes	g__UBA4720	o__Gemmatimonadales
7-1_NODE_4217	7-1_bin.4	d__Bacteria;p__Gemmatimonadota;c__Gemmatimonadetes;o__Gemmatimonadales;f__Gemmatimonadaceae;g__UBA4720;s__	blastn_homology	c__Gemmatimonadetes	g__UBA4720	o__Gemmatimonadales
8-3_NODE_1720	8-3_bin.4	d__Archaea;p__Thermoplasmatota;c__Thermoplasmata;o__UBA184;f__UBA184;g__UBA184;s__	blastn_homology	c__Thermoplasmata	g__UBA184	o__UBA184
1-8_NODE_3369	1-8_bin.30	d__Bacteria;p__Patescibacteria;c__Saccharimonadia;o__Saccharimonadales;f__UBA10212;g__;s__	blastn_homology	c__Saccharimonadia	g__	o__Saccharimonadales
1-8_NODE_3412	1-8_bin.30	d__Bacteria;p__Patescibacteria;c__Saccharimonadia;o__Saccharimonadales;f__UBA10212;g__;s__	blastn_homology	c__Saccharimonadia	g__	o__Saccharimonadales
1-8_NODE_3434	1-1_bin.12	d__Bacteria;p__Patescibacteria;c__Saccharimonadia;o__Saccharimonadales;f__JACDFO01;g__JACDFO01;s__	blastn_homology	c__Saccharimonadia	g__JACDFO01	o__Saccharimonadales
7-6_NODE_4499	4-2_bin.12	d__Bacteria;p__Acidobacteriota;c__Acidobacteriae;o__Acidobacteriales;f__Acidobacteriaceae;g__Terracidiphilus;s__	blastn_homology	c__Acidobacteriae	g__Terracidiphilus	o__Acidobacteriales
3-26_NODE_1939	3-4_bin.4	d__Bacteria;p__Proteobacteria;c__Alphaproteobacteria;o__Rhizobiales;f__Aestuariivirgaceae;g__Aestuariivirga;s__	blastn_homology	c__Alphaproteobacteria	g__Aestuariivirga	o__Rhizobiales
3-26_NODE_1939	4-6_bin.5	d__Bacteria;p__Acidobacteriota;c__Acidobacteriae;o__Acidobacteriales;f__SbA1;g__QIAJ01;s__	blastn_homology	c__Acidobacteriae	g__QIAJ01	o__Acidobacteriales
3-26_NODE_1939	2-4_bin.2	d__Bacteria;p__Nitrospirota;c__Nitrospiria;o__Nitrospirales;f__Nitrospiraceae;g__Nitrospira_F;s__Nitrospira_F sp002083565	blastn_homology	c__Nitrospiria	g__Nitrospira_F	o__Nitrospirales
7-1_NODE_4021	7-1_bin.4	d__Bacteria;p__Gemmatimonadota;c__Gemmatimonadetes;o__Gemmatimonadales;f__Gemmatimonadaceae;g__UBA4720;s__	blastn_homology	c__Gemmatimonadetes	g__UBA4720	o__Gemmatimonadales
7-1_NODE_1899	7-1_bin.4	d__Bacteria;p__Gemmatimonadota;c__Gemmatimonadetes;o__Gemmatimonadales;f__Gemmatimonadaceae;g__UBA4720;s__	blastn_homology	c__Gemmatimonadetes	g__UBA4720	o__Gemmatimonadales
2-56_NODE_4328	2-4_bin.28	d__Bacteria;p__Verrucomicrobiota;c__Verrucomicrobiae;o__Pedosphaerales;f__;g__;s__	blastn_homology	c__Verrucomicrobiae	g__	o__Pedosphaerales
7-6_NODE_1760	6-4_bin.4	d__Bacteria;p__Acidobacteriota;c__Acidobacteriae;o__Acidobacteriales;f__DSPA01;g__DSPA01;s__	blastn_homology	c__Acidobacteriae	g__DSPA01	o__Acidobacteriales
7-6_NODE_6743	8-4_bin.18	d__Bacteria;p__Proteobacteria;c__Alphaproteobacteria;o__Rhizobiales;f__Xanthobacteraceae;g__;s__	blastn_homology	c__Alphaproteobacteria	g__	o__Rhizobiales
7-1_NODE_3120	7-1_bin.4	d__Bacteria;p__Gemmatimonadota;c__Gemmatimonadetes;o__Gemmatimonadales;f__Gemmatimonadaceae;g__UBA4720;s__	blastn_homology	c__Gemmatimonadetes	g__UBA4720	o__Gemmatimonadales
8-4_NODE_452	6-4_bin.4	d__Bacteria;p__Acidobacteriota;c__Acidobacteriae;o__Acidobacteriales;f__DSPA01;g__DSPA01;s__	blastn_homology	c__Acidobacteriae	g__DSPA01	o__Acidobacteriales
5-7_NODE_417	5-7_bin.18	d__Bacteria;p__Actinobacteriota;c__Acidimicrobiia;o__IMCC26256;f__PALSA-555;g__;s__	blastn_homology	c__Acidimicrobiia	g__	o__IMCC26256
7-2_NODE_2586	6-4_bin.4	d__Bacteria;p__Acidobacteriota;c__Acidobacteriae;o__Acidobacteriales;f__DSPA01;g__DSPA01;s__	blastn_homology	c__Acidobacteriae	g__DSPA01	o__Acidobacteriales
6-2_NODE_3485	6-2_bin.14	d__Bacteria;p__Acidobacteriota;c__Mor1;o__Mor1;f__;g__;s__	blastn_homology	c__Mor1	g__	o__Mor1
1-4_NODE_351	3-4_bin.15	d__Bacteria;p__Actinobacteriota;c__Actinomycetia;o__Propionibacteriales;f__Nocardioidaceae;g__Marmoricola;s__	blastn_homology	c__Actinomycetia	g__Marmoricola	o__Propionibacteriales
7-1_NODE_3636	7-1_bin.4	d__Bacteria;p__Gemmatimonadota;c__Gemmatimonadetes;o__Gemmatimonadales;f__Gemmatimonadaceae;g__UBA4720;s__	blastn_homology	c__Gemmatimonadetes	g__UBA4720	o__Gemmatimonadales
8-4_NODE_3114	6-4_bin.4	d__Bacteria;p__Acidobacteriota;c__Acidobacteriae;o__Acidobacteriales;f__DSPA01;g__DSPA01;s__	blastn_homology	c__Acidobacteriae	g__DSPA01	o__Acidobacteriales
7-2_NODE_765	6-4_bin.4	d__Bacteria;p__Acidobacteriota;c__Acidobacteriae;o__Acidobacteriales;f__DSPA01;g__DSPA01;s__	blastn_homology	c__Acidobacteriae	g__DSPA01	o__Acidobacteriales
7-6_NODE_4932	6-4_bin.4	d__Bacteria;p__Acidobacteriota;c__Acidobacteriae;o__Acidobacteriales;f__DSPA01;g__DSPA01;s__	blastn_homology	c__Acidobacteriae	g__DSPA01	o__Acidobacteriales
5-5_NODE_4957	5-6_bin.5	d__Bacteria;p__Proteobacteria;c__Alphaproteobacteria;o__Rhizobiales;f__Xanthobacteraceae;g__Z2-YC6860;s__	blastn_homology	c__Alphaproteobacteria	g__Z2-YC6860	o__Rhizobiales
6-2_NODE_9217	6-3_bin.3	d__Bacteria;p__Actinobacteriota;c__UBA4738;o__UBA4738;f__HRBIN12;g__AC-51;s__	blastn_homology	c__UBA4738	g__AC-51	o__UBA4738
7-1_NODE_3791	7-1_bin.4	d__Bacteria;p__Gemmatimonadota;c__Gemmatimonadetes;o__Gemmatimonadales;f__Gemmatimonadaceae;g__UBA4720;s__	blastn_homology	c__Gemmatimonadetes	g__UBA4720	o__Gemmatimonadales
8-3_NODE_2170	8-3_bin.3	d__Bacteria;p__Patescibacteria;c__Paceibacteria;o__UBA9983_A;f__UBA2103;g__C7867-001;s__	blastn_homology	c__Paceibacteria	g__C7867-001	o__UBA9983_A
8-4_NODE_3969	8-4_bin.3	d__Bacteria;p__Desulfobacterota_B;c__Binatia;o__Bin18;f__Bin18;g__;s__	blastn_homology	c__Binatia	g__	o__Bin18
2-4_NODE_2379	2-4_bin.10	d__Bacteria;p__Verrucomicrobiota;c__Verrucomicrobiae;o__Opitutales;f__Opitutaceae;g__Lacunisphaera;s__	blastn_homology	c__Verrucomicrobiae	g__Lacunisphaera	o__Opitutales
4-6_NODE_414	4-6_bin.5	d__Bacteria;p__Acidobacteriota;c__Acidobacteriae;o__Acidobacteriales;f__SbA1;g__QIAJ01;s__	blastn_homology	c__Acidobacteriae	g__QIAJ01	o__Acidobacteriales
3-5_NODE_1195_fragment_1	3-26_bin.19	d__Bacteria;p__Patescibacteria;c__Saccharimonadia;o__Saccharimonadales;f__UBA5946;g__;s__	blastn_homology	c__Saccharimonadia	g__	o__Saccharimonadales
8-3_NODE_600	4-6_bin.5	d__Bacteria;p__Acidobacteriota;c__Acidobacteriae;o__Acidobacteriales;f__SbA1;g__QIAJ01;s__	blastn_homology	c__Acidobacteriae	g__QIAJ01	o__Acidobacteriales
7-2_NODE_260	6-4_bin.4	d__Bacteria;p__Acidobacteriota;c__Acidobacteriae;o__Acidobacteriales;f__DSPA01;g__DSPA01;s__	blastn_homology	c__Acidobacteriae	g__DSPA01	o__Acidobacteriales
3-26_NODE_1_fragment_4	3-26_bin.19	d__Bacteria;p__Patescibacteria;c__Saccharimonadia;o__Saccharimonadales;f__UBA5946;g__;s__	blastn_homology	c__Saccharimonadia	g__	o__Saccharimonadales
2-66_NODE_19_fragment_2	1-8_bin.2	d__Bacteria;p__Actinobacteriota;c__Actinomycetia;o__Mycobacteriales;f__SCTD01;g__;s__	blastn_homology	c__Actinomycetia	g__	o__Mycobacteriales
2-66_NODE_19_fragment_2	1-8_vamb_8486	d__Bacteria;p__Actinobacteriota;c__Actinomycetia;o__Propionibacteriales;f__Nocardioidaceae;g__Nocardioides_B;s__	blastn_homology	c__Actinomycetia	g__Nocardioides_B	o__Propionibacteriales
2-66_NODE_19_fragment_2	1-8_bin.12	d__Bacteria;p__Actinobacteriota;c__Actinomycetia;o__Actinomycetales;f__Micrococcaceae;g__Pseudarthrobacter;s__Pseudarthrobacter sulfonivorans_A	blastn_homology	c__Actinomycetia	g__Pseudarthrobacter	o__Actinomycetales
6-3_NODE_3251_fragment_1	1-8_bin.43	d__Bacteria;p__Patescibacteria;c__Saccharimonadia;o__Saccharimonadales;f__JACDFO01;g__;s__	blastn_homology	c__Saccharimonadia	g__	o__Saccharimonadales
1-8_NODE_268_fragment_1	1-8_bin.36	d__Bacteria;p__Patescibacteria;c__Saccharimonadia;o__;f__;g__;s__	blastn_homology	c__Saccharimonadia	g__	o__
1-8_NODE_268_fragment_2	1-8_bin.36	d__Bacteria;p__Patescibacteria;c__Saccharimonadia;o__;f__;g__;s__	blastn_homology	c__Saccharimonadia	g__	o__
1-8_NODE_1987_fragment_1	1-8_bin.28	d__Bacteria;p__Actinobacteriota;c__Actinomycetia;o__Propionibacteriales;f__Nocardioidaceae;g__Nocardioides;s__	blastn_homology	c__Actinomycetia	g__Nocardioides	o__Propionibacteriales
1-8_NODE_4064	1-8_bin.4	d__Bacteria;p__Proteobacteria;c__Gammaproteobacteria;o__Xanthomonadales;f__Xanthomonadaceae;g__Lysobacter;s__	blastn_homology	c__Gammaproteobacteria	g__Lysobacter	o__Xanthomonadales
1-8_NODE_4064	1-8_bin.19	d__Bacteria;p__Proteobacteria;c__Gammaproteobacteria;o__Burkholderiales;f__Burkholderiaceae;g__Ramlibacter;s__	blastn_homology	c__Gammaproteobacteria	g__Ramlibacter	o__Burkholderiales
5-7_NODE_13_fragment_1	8-4_bin.18	d__Bacteria;p__Proteobacteria;c__Alphaproteobacteria;o__Rhizobiales;f__Xanthobacteraceae;g__;s__	blastn_homology	c__Alphaproteobacteria	g__	o__Rhizobiales
6-2_NODE_3431_fragment_1	4-2_bin.13	d__Bacteria;p__Actinobacteriota;c__Thermoleophilia;o__Solirubrobacterales;f__Solirubrobacteraceae;g__Palsa-744;s__	blastn_homology	c__Thermoleophilia	g__Palsa-744	o__Solirubrobacterales
2-4_NODE_1189	2-66_bin.24	d__Bacteria;p__Gemmatimonadota;c__Gemmatimonadetes;o__Gemmatimonadales;f__GWC2-71-9;g__JABFSM01;s__	blastn_homology	c__Gemmatimonadetes	g__JABFSM01	o__Gemmatimonadales
2-56_NODE_2777	1-1_bin.8	d__Bacteria;p__Actinobacteriota;c__Acidimicrobiia;o__Acidimicrobiales;f__CADCTF01;g__;s__	blastn_homology	c__Acidimicrobiia	g__	o__Acidimicrobiales
3-26_NODE_255_fragment_1	3-26_bin.19	d__Bacteria;p__Patescibacteria;c__Saccharimonadia;o__Saccharimonadales;f__UBA5946;g__;s__	blastn_homology	c__Saccharimonadia	g__	o__Saccharimonadales
1-8_NODE_149_fragment_1	1-8_bin.5	d__Bacteria;p__Patescibacteria;c__Saccharimonadia;o__Saccharimonadales;f__2-12-FULL-41-12;g__;s__	blastn_homology	c__Saccharimonadia	g__	o__Saccharimonadales
8-3_NODE_4748	8-3_bin.4	d__Archaea;p__Thermoplasmatota;c__Thermoplasmata;o__UBA184;f__UBA184;g__UBA184;s__	blastn_homology	c__Thermoplasmata	g__UBA184	o__UBA184
7-2_NODE_513_fragment_1	1-8_bin.4	d__Bacteria;p__Proteobacteria;c__Gammaproteobacteria;o__Xanthomonadales;f__Xanthomonadaceae;g__Lysobacter;s__	blastn_homology	c__Gammaproteobacteria	g__Lysobacter	o__Xanthomonadales
6-4_NODE_811	2-4_bin.19	d__Bacteria;p__Planctomycetota;c__Planctomycetia;o__Pirellulales;f__Pirellulaceae;g__;s__	blastn_homology	c__Planctomycetia	g__	o__Pirellulales
5-5_NODE_1_fragment_4	7-2_bin.17	d__Bacteria;p__Proteobacteria;c__Gammaproteobacteria;o__Pseudomonadales;f__Pseudomonadaceae;g__Pseudomonas_E;s__	blastn_homology	c__Gammaproteobacteria	g__Pseudomonas_E	o__Pseudomonadales
2-66_NODE_1_fragment_19	1-8_bin.43	d__Bacteria;p__Patescibacteria;c__Saccharimonadia;o__Saccharimonadales;f__JACDFO01;g__;s__	blastn_homology	c__Saccharimonadia	g__	o__Saccharimonadales
2-66_NODE_1_fragment_5	1-8_bin.43	d__Bacteria;p__Patescibacteria;c__Saccharimonadia;o__Saccharimonadales;f__JACDFO01;g__;s__	blastn_homology	c__Saccharimonadia	g__	o__Saccharimonadales
1-8_NODE_7_fragment_9	1-8_bin.43	d__Bacteria;p__Patescibacteria;c__Saccharimonadia;o__Saccharimonadales;f__JACDFO01;g__;s__	blastn_homology	c__Saccharimonadia	g__	o__Saccharimonadales
1-8_NODE_7_fragment_5	1-8_bin.43	d__Bacteria;p__Patescibacteria;c__Saccharimonadia;o__Saccharimonadales;f__JACDFO01;g__;s__	blastn_homology	c__Saccharimonadia	g__	o__Saccharimonadales
1-8_NODE_7_fragment_1	1-8_bin.43	d__Bacteria;p__Patescibacteria;c__Saccharimonadia;o__Saccharimonadales;f__JACDFO01;g__;s__	blastn_homology	c__Saccharimonadia	g__	o__Saccharimonadales
1-8_NODE_7_fragment_2	1-8_bin.43	d__Bacteria;p__Patescibacteria;c__Saccharimonadia;o__Saccharimonadales;f__JACDFO01;g__;s__	blastn_homology	c__Saccharimonadia	g__	o__Saccharimonadales
1-8_NODE_19_fragment_8	1-8_bin.43	d__Bacteria;p__Patescibacteria;c__Saccharimonadia;o__Saccharimonadales;f__JACDFO01;g__;s__	blastn_homology	c__Saccharimonadia	g__	o__Saccharimonadales
2-4_NODE_2573_1	2-56_bin.13	d__Bacteria;p__Proteobacteria;c__Gammaproteobacteria;o__Acidiferrobacterales;f__Sulfurifustaceae;g__Sulfuricaulis;s__	blastn_homology	c__Gammaproteobacteria	g__Sulfuricaulis	o__Acidiferrobacterales
3-5_NODE_4590_1	2-56_bin.32	d__Bacteria;p__Proteobacteria;c__Gammaproteobacteria;o__Burkholderiales;f__Sulfuricellaceae_A;g__;s__	blastn_homology	c__Gammaproteobacteria	g__	o__Burkholderiales
7-1_NODE_183_1	6-4_bin.4	d__Bacteria;p__Acidobacteriota;c__Acidobacteriae;o__Acidobacteriales;f__DSPA01;g__DSPA01;s__	blastn_homology	c__Acidobacteriae	g__DSPA01	o__Acidobacteriales
5-7_NODE_2662_1	7-2_bin.15	d__Bacteria;p__Gemmatimonadota;c__Gemmatimonadetes;o__Gemmatimonadales;f__Gemmatimonadaceae;g__UBA4720;s__	blastn_homology	c__Gemmatimonadetes	g__UBA4720	o__Gemmatimonadales
6-2_NODE_218_1	6-4_bin.4	d__Bacteria;p__Acidobacteriota;c__Acidobacteriae;o__Acidobacteriales;f__DSPA01;g__DSPA01;s__	blastn_homology	c__Acidobacteriae	g__DSPA01	o__Acidobacteriales
6-4_NODE_115_1	6-4_bin.4	d__Bacteria;p__Acidobacteriota;c__Acidobacteriae;o__Acidobacteriales;f__DSPA01;g__DSPA01;s__	blastn_homology	c__Acidobacteriae	g__DSPA01	o__Acidobacteriales
4-7_NODE_1375_1	7-2_bin.13	d__Bacteria;p__Methylomirabilota;c__Methylomirabilia;o__Rokubacteriales;f__CSP1-6;g__;s__	blastn_homology	c__Methylomirabilia	g__	o__Rokubacteriales
2-56_NODE_9863_1	2-4_bin.1	d__Bacteria;p__Acidobacteriota;c__Blastocatellia;o__Pyrinomonadales;f__Pyrinomonadaceae;g__OLB17;s__	blastn_homology	c__Blastocatellia	g__OLB17	o__Pyrinomonadales
8-3_NODE_4625_1	8-3_bin.3	d__Bacteria;p__Patescibacteria;c__Paceibacteria;o__UBA9983_A;f__UBA2103;g__C7867-001;s__	blastn_homology	c__Paceibacteria	g__C7867-001	o__UBA9983_A
5-5_NODE_77_fragment_1_1	7-2_bin.17	d__Bacteria;p__Proteobacteria;c__Gammaproteobacteria;o__Pseudomonadales;f__Pseudomonadaceae;g__Pseudomonas_E;s__	blastn_homology	c__Gammaproteobacteria	g__Pseudomonas_E	o__Pseudomonadales
5-5_NODE_1_fragment_3_1	7-2_bin.17	d__Bacteria;p__Proteobacteria;c__Gammaproteobacteria;o__Pseudomonadales;f__Pseudomonadaceae;g__Pseudomonas_E;s__	blastn_homology	c__Gammaproteobacteria	g__Pseudomonas_E	o__Pseudomonadales
1-1_NODE_100_fragment_1	NA	d__Bacteria;p__Actinobacteriota;c__Actinomycetia;o__Mycobacteriales;f__Mycobacteriaceae;g__Rhodococcus_B	iphop	c__Actinomycetia	g__Rhodococcus_B	o__Mycobacteriales
1-1_NODE_1051_fragment_1	NA	d__Bacteria;p__Actinobacteriota;c__Actinomycetia;o__Propionibacteriales;f__Nocardioidaceae;g__Nocardioides	iphop	c__Actinomycetia	g__Nocardioides	o__Propionibacteriales
1-1_NODE_1062	NA	d__Bacteria;p__Actinobacteriota;c__Actinomycetia;o__Mycobacteriales;f__Mycobacteriaceae;g__Rhodococcus	iphop	c__Actinomycetia	g__Rhodococcus	o__Mycobacteriales
1-1_NODE_1076_fragment_2	NA	d__Bacteria;p__Proteobacteria;c__Alphaproteobacteria;o__Rhizobiales;f__Beijerinckiaceae;g__Methylobacterium	iphop	c__Alphaproteobacteria	g__Methylobacterium	o__Rhizobiales
1-1_NODE_1190_fragment_1	NA	d__Bacteria;p__Proteobacteria;c__Alphaproteobacteria;o__Rhizobiales;f__Beijerinckiaceae;g__Methylobacterium	iphop	c__Alphaproteobacteria	g__Methylobacterium	o__Rhizobiales
1-1_NODE_11_fragment_8	NA	d__Bacteria;p__Proteobacteria;c__Alphaproteobacteria;o__Rhizobiales;f__Beijerinckiaceae;g__Methylobacterium	iphop	c__Alphaproteobacteria	g__Methylobacterium	o__Rhizobiales
1-1_NODE_1205	NA	d__Bacteria;p__Proteobacteria;c__Gammaproteobacteria;o__Burkholderiales;f__Burkholderiaceae;g__Comamonas	iphop	c__Gammaproteobacteria	g__Comamonas	o__Burkholderiales
1-1_NODE_1315	NA	d__Bacteria;p__Proteobacteria;c__Alphaproteobacteria;o__Rhizobiales;f__Beijerinckiaceae;g__Methylobacterium	iphop	c__Alphaproteobacteria	g__Methylobacterium	o__Rhizobiales
1-1_NODE_1339_1	NA	d__Bacteria;p__Proteobacteria;c__Alphaproteobacteria;o__Rhizobiales;f__Beijerinckiaceae;g__Methylobacterium	iphop	c__Alphaproteobacteria	g__Methylobacterium	o__Rhizobiales
1-1_NODE_135_fragment_1	NA	d__Bacteria;p__Proteobacteria;c__Alphaproteobacteria;o__Sphingomonadales;f__Sphingomonadaceae;g__Rhizorhabdus	iphop	c__Alphaproteobacteria	g__Rhizorhabdus	o__Sphingomonadales
1-1_NODE_1417	NA	Unknown	iphop	Unknown	Unknown	Unknown
1-1_NODE_1417	NA	d__Bacteria;p__Proteobacteria;c__Gammaproteobacteria;o__Burkholderiales;f__Burkholderiaceae;g__Variovorax	iphop	c__Gammaproteobacteria	g__Variovorax	o__Burkholderiales
1-1_NODE_142_fragment_2	NA	d__Bacteria;p__Actinobacteriota;c__Actinomycetia;o__Mycobacteriales;f__Mycobacteriaceae;g__Rhodococcus_B	iphop	c__Actinomycetia	g__Rhodococcus_B	o__Mycobacteriales
1-1_NODE_1467_fragment_1	NA	d__Bacteria;p__Proteobacteria;c__Alphaproteobacteria;o__Rhizobiales;f__Beijerinckiaceae;g__Methylobacterium	iphop	c__Alphaproteobacteria	g__Methylobacterium	o__Rhizobiales
1-1_NODE_14740_1	NA	d__Bacteria;p__Proteobacteria;c__Alphaproteobacteria;o__Reyranellales;f__Reyranellaceae;g__Reyranella	iphop	c__Alphaproteobacteria	g__Reyranella	o__Reyranellales
1-1_NODE_14950_1	NA	d__Bacteria;p__Proteobacteria;c__Alphaproteobacteria;o__Rhizobiales;f__Beijerinckiaceae;g__Methylobacterium	iphop	c__Alphaproteobacteria	g__Methylobacterium	o__Rhizobiales
1-1_NODE_151_fragment_1	NA	d__Bacteria;p__Actinobacteriota;c__Actinomycetia;o__Mycobacteriales;f__Mycobacteriaceae;g__Rhodococcus	iphop	c__Actinomycetia	g__Rhodococcus	o__Mycobacteriales
1-1_NODE_1528	NA	d__Bacteria;p__Proteobacteria;c__Alphaproteobacteria;o__Rhizobiales;f__Rhizobiaceae;g__Rhizobium	iphop	c__Alphaproteobacteria	g__Rhizobium	o__Rhizobiales
1-1_NODE_1589_1	NA	d__Bacteria;p__Proteobacteria;c__Alphaproteobacteria;o__Rhizobiales;f__Beijerinckiaceae;g__Methylobacterium	iphop	c__Alphaproteobacteria	g__Methylobacterium	o__Rhizobiales
1-1_NODE_1698	NA	d__Bacteria;p__Proteobacteria;c__Alphaproteobacteria;o__Rhizobiales;f__Beijerinckiaceae;g__Methylobacterium	iphop	c__Alphaproteobacteria	g__Methylobacterium	o__Rhizobiales
1-1_NODE_17475_1	NA	d__Bacteria;p__Proteobacteria;c__Alphaproteobacteria;o__Rhizobiales;f__Beijerinckiaceae;g__Methylobacterium	iphop	c__Alphaproteobacteria	g__Methylobacterium	o__Rhizobiales
1-1_NODE_1762	NA	d__Bacteria;p__Proteobacteria;c__Gammaproteobacteria;o__Burkholderiales;f__Burkholderiaceae;g__Comamonas	iphop	c__Gammaproteobacteria	g__Comamonas	o__Burkholderiales
1-1_NODE_1770	NA	d__Bacteria;p__Proteobacteria;c__Alphaproteobacteria;o__Rhizobiales;f__Rhizobiaceae;g__Rhizobium	iphop	c__Alphaproteobacteria	g__Rhizobium	o__Rhizobiales
1-1_NODE_1774	NA	d__Bacteria;p__Proteobacteria;c__Gammaproteobacteria;o__Enterobacterales;f__Vibrionaceae;g__Vibrio	iphop	c__Gammaproteobacteria	g__Vibrio	o__Enterobacterales
1-1_NODE_1790	NA	d__Bacteria;p__Proteobacteria;c__Gammaproteobacteria;o__Pseudomonadales;f__Moraxellaceae;g__Acinetobacter	iphop	c__Gammaproteobacteria	g__Acinetobacter	o__Pseudomonadales
1-1_NODE_1815	NA	d__Bacteria;p__Bacteroidota;c__Bacteroidia;o__Bacteroidales;f__Bacteroidaceae;g__Bacteroides	iphop	c__Bacteroidia	g__Bacteroides	o__Bacteroidales
1-1_NODE_1905	NA	d__Bacteria;p__Proteobacteria;c__Alphaproteobacteria;o__Rhizobiales;f__Rhizobiaceae;g__Rhizobium	iphop	c__Alphaproteobacteria	g__Rhizobium	o__Rhizobiales
1-1_NODE_1971	NA	d__Bacteria;p__Actinobacteriota;c__Actinomycetia;o__Actinomycetales;f__Microbacteriaceae;g__Microbacterium	iphop	c__Actinomycetia	g__Microbacterium	o__Actinomycetales
1-1_NODE_214_fragment_3	NA	d__Bacteria;p__Bacteroidota;c__Bacteroidia;o__Cytophagales;f__Spirosomaceae;g__Larkinella	iphop	c__Bacteroidia	g__Larkinella	o__Cytophagales
1-1_NODE_2171	NA	d__Bacteria;p__Proteobacteria;c__Alphaproteobacteria;o__Rhizobiales;f__Rhizobiaceae;g__Rhizobium_A	iphop	c__Alphaproteobacteria	g__Rhizobium_A	o__Rhizobiales
1-1_NODE_2182	NA	d__Bacteria;p__Proteobacteria;c__Alphaproteobacteria;o__Rhodobacterales;f__Rhodobacteraceae;g__Phaeovulum	iphop	c__Alphaproteobacteria	g__Phaeovulum	o__Rhodobacterales
1-1_NODE_21833_1	NA	d__Bacteria;p__Actinobacteriota;c__Thermoleophilia;o__Solirubrobacterales;f__Solirubrobacteraceae;g__Solirubrobacter	iphop	c__Thermoleophilia	g__Solirubrobacter	o__Solirubrobacterales
1-1_NODE_2211	NA	d__Bacteria;p__Actinobacteriota;c__Actinomycetia;o__Propionibacteriales;f__Nocardioidaceae;g__Nocardioides	iphop	c__Actinomycetia	g__Nocardioides	o__Propionibacteriales
1-1_NODE_2242_1	NA	d__Bacteria;p__Proteobacteria;c__Gammaproteobacteria;o__Burkholderiales;f__Burkholderiaceae;g__Comamonas	iphop	c__Gammaproteobacteria	g__Comamonas	o__Burkholderiales
1-1_NODE_2260	NA	d__Bacteria;p__Proteobacteria;c__Gammaproteobacteria;o__Burkholderiales;f__Burkholderiaceae;g__Comamonas	iphop	c__Gammaproteobacteria	g__Comamonas	o__Burkholderiales
1-1_NODE_2269_fragment_1	NA	d__Bacteria;p__Actinobacteriota;c__Actinomycetia;o__Actinomycetales;f__Microbacteriaceae;g__Microbacterium	iphop	c__Actinomycetia	g__Microbacterium	o__Actinomycetales
1-1_NODE_2358	NA	d__Bacteria;p__Proteobacteria;c__Alphaproteobacteria;o__Rhizobiales;f__Beijerinckiaceae;g__Methylobacterium	iphop	c__Alphaproteobacteria	g__Methylobacterium	o__Rhizobiales
1-1_NODE_2449	NA	d__Bacteria;p__Proteobacteria;c__Alphaproteobacteria;o__Sphingomonadales;f__Sphingomonadaceae;g__Sphingobium	iphop	c__Alphaproteobacteria	g__Sphingobium	o__Sphingomonadales
1-1_NODE_2480	NA	d__Bacteria;p__Actinobacteriota;c__Actinomycetia;o__Propionibacteriales;f__Nocardioidaceae;g__Nocardioides	iphop	c__Actinomycetia	g__Nocardioides	o__Propionibacteriales
1-1_NODE_2542_1	NA	d__Bacteria;p__Proteobacteria;c__Gammaproteobacteria;o__Burkholderiales;f__Burkholderiaceae;g__Comamonas	iphop	c__Gammaproteobacteria	g__Comamonas	o__Burkholderiales
1-1_NODE_2564_1	NA	d__Bacteria;p__Proteobacteria;c__Gammaproteobacteria;o__Xanthomonadales;f__Xanthomonadaceae;g__Luteimonas	iphop	c__Gammaproteobacteria	g__Luteimonas	o__Xanthomonadales
1-1_NODE_267_fragment_1	NA	d__Bacteria;p__Proteobacteria;c__Alphaproteobacteria;o__Rhizobiales;f__Beijerinckiaceae;g__Methylobacterium	iphop	c__Alphaproteobacteria	g__Methylobacterium	o__Rhizobiales
1-1_NODE_29	NA	d__Bacteria;p__Actinobacteriota;c__Actinomycetia;o__Mycobacteriales;f__Mycobacteriaceae;g__Rhodococcus	iphop	c__Actinomycetia	g__Rhodococcus	o__Mycobacteriales
1-1_NODE_2946	NA	Unknown	iphop	Unknown	Unknown	Unknown
1-1_NODE_3094	NA	d__Bacteria;p__Proteobacteria;c__Gammaproteobacteria;o__Burkholderiales;f__Burkholderiaceae;g__Comamonas	iphop	c__Gammaproteobacteria	g__Comamonas	o__Burkholderiales
1-1_NODE_309_fragment_1	NA	d__Bacteria;p__Proteobacteria;c__Alphaproteobacteria;o__Rhizobiales;f__Rhizobiaceae;g__Agrobacterium	iphop	c__Alphaproteobacteria	g__Agrobacterium	o__Rhizobiales
1-1_NODE_3156	NA	d__Bacteria;p__Proteobacteria;c__Gammaproteobacteria;o__Enterobacterales;f__Enterobacteriaceae;g__Rouxiella	iphop	c__Gammaproteobacteria	g__Rouxiella	o__Enterobacterales
1-1_NODE_3220	NA	d__Bacteria;p__Proteobacteria;c__Alphaproteobacteria;o__Rhizobiales;f__Beijerinckiaceae;g__Methylobacterium	iphop	c__Alphaproteobacteria	g__Methylobacterium	o__Rhizobiales
1-1_NODE_3227	NA	d__Bacteria;p__Proteobacteria;c__Gammaproteobacteria;o__Xanthomonadales;f__Xanthomonadaceae;g__Stenotrophomonas	iphop	c__Gammaproteobacteria	g__Stenotrophomonas	o__Xanthomonadales
1-1_NODE_3275	NA	d__Bacteria;p__Proteobacteria;c__Alphaproteobacteria;o__Sphingomonadales;f__Sphingomonadaceae;g__Sphingopyxis	iphop	c__Alphaproteobacteria	g__Sphingopyxis	o__Sphingomonadales
1-1_NODE_3296	NA	d__Bacteria;p__Proteobacteria;c__Gammaproteobacteria;o__Burkholderiales;f__Burkholderiaceae;g__Comamonas	iphop	c__Gammaproteobacteria	g__Comamonas	o__Burkholderiales
1-1_NODE_3360	NA	d__Bacteria;p__Proteobacteria;c__Gammaproteobacteria;o__Burkholderiales;f__Burkholderiaceae;g__Comamonas	iphop	c__Gammaproteobacteria	g__Comamonas	o__Burkholderiales
1-1_NODE_3413	NA	d__Bacteria;p__Actinobacteriota;c__Actinomycetia;o__Mycobacteriales;f__Mycobacteriaceae;g__Rhodococcus	iphop	c__Actinomycetia	g__Rhodococcus	o__Mycobacteriales
1-1_NODE_348	NA	d__Bacteria;p__Proteobacteria;c__Gammaproteobacteria;o__Burkholderiales;f__Burkholderiaceae;g__Massilia	iphop	c__Gammaproteobacteria	g__Massilia	o__Burkholderiales
1-1_NODE_3480	NA	d__Bacteria;p__Proteobacteria;c__Gammaproteobacteria;o__Burkholderiales;f__Burkholderiaceae;g__Comamonas	iphop	c__Gammaproteobacteria	g__Comamonas	o__Burkholderiales
1-1_NODE_3571	NA	d__Bacteria;p__Proteobacteria;c__Alphaproteobacteria;o__Rhizobiales;f__Beijerinckiaceae;g__Methylobacterium	iphop	c__Alphaproteobacteria	g__Methylobacterium	o__Rhizobiales
1-1_NODE_3609	NA	d__Bacteria;p__Actinobacteriota;c__Actinomycetia;o__Mycobacteriales;f__Mycobacteriaceae;g__Rhodococcus	iphop	c__Actinomycetia	g__Rhodococcus	o__Mycobacteriales
1-1_NODE_3693	NA	d__Bacteria;p__Proteobacteria;c__Gammaproteobacteria;o__Burkholderiales;f__Gallionellaceae;g__Gallionella	iphop	c__Gammaproteobacteria	g__Gallionella	o__Burkholderiales
1-1_NODE_3897	NA	d__Bacteria;p__Proteobacteria;c__Alphaproteobacteria;o__Rhizobiales;f__Beijerinckiaceae;g__Methylobacterium	iphop	c__Alphaproteobacteria	g__Methylobacterium	o__Rhizobiales
1-1_NODE_3907	NA	d__Bacteria;p__Proteobacteria;c__Alphaproteobacteria;o__Rhizobiales;f__Beijerinckiaceae;g__Methylobacterium	iphop	c__Alphaproteobacteria	g__Methylobacterium	o__Rhizobiales
1-1_NODE_3943	NA	d__Bacteria;p__Proteobacteria;c__Gammaproteobacteria;o__Burkholderiales;f__Burkholderiaceae;g__Comamonas	iphop	c__Gammaproteobacteria	g__Comamonas	o__Burkholderiales
1-1_NODE_39_fragment_3	NA	d__Bacteria;p__Actinobacteriota;c__Actinomycetia;o__Mycobacteriales;f__Mycobacteriaceae;g__Rhodococcus_B	iphop	c__Actinomycetia	g__Rhodococcus_B	o__Mycobacteriales
1-1_NODE_4109	NA	d__Bacteria;p__Proteobacteria;c__Alphaproteobacteria;o__Rhizobiales;f__Beijerinckiaceae;g__Methylobacterium	iphop	c__Alphaproteobacteria	g__Methylobacterium	o__Rhizobiales
1-1_NODE_4149	NA	d__Bacteria;p__Actinobacteriota;c__Actinomycetia;o__Mycobacteriales;f__Mycobacteriaceae;g__Rhodococcus	iphop	c__Actinomycetia	g__Rhodococcus	o__Mycobacteriales
1-1_NODE_4154	NA	d__Bacteria;p__Proteobacteria;c__Alphaproteobacteria;o__Rhodobacterales;f__Rhodobacteraceae;g__Palleronia	iphop	c__Alphaproteobacteria	g__Palleronia	o__Rhodobacterales
1-1_NODE_4163	NA	d__Bacteria;p__Proteobacteria;c__Alphaproteobacteria;o__Rhizobiales;f__Beijerinckiaceae;g__Methylobacterium	iphop	c__Alphaproteobacteria	g__Methylobacterium	o__Rhizobiales
1-1_NODE_4250	NA	d__Bacteria;p__Actinobacteriota;c__Thermoleophilia;o__Solirubrobacterales;f__Solirubrobacteraceae;g__Conexibacter	iphop	c__Thermoleophilia	g__Conexibacter	o__Solirubrobacterales
1-1_NODE_4286	NA	d__Bacteria;p__Proteobacteria;c__Gammaproteobacteria;o__Burkholderiales;f__Burkholderiaceae;g__Comamonas	iphop	c__Gammaproteobacteria	g__Comamonas	o__Burkholderiales
1-1_NODE_4367	NA	d__Bacteria;p__Bacteroidota;c__Bacteroidia;o__Cytophagales;f__Spirosomaceae;g__Spirosoma	iphop	c__Bacteroidia	g__Spirosoma	o__Cytophagales
1-1_NODE_4380	NA	d__Bacteria;p__Actinobacteriota;c__Actinomycetia;o__Actinomycetales;f__Microbacteriaceae;g__Protaetiibacter	iphop	c__Actinomycetia	g__Protaetiibacter	o__Actinomycetales
1-1_NODE_4435	NA	d__Bacteria;p__Proteobacteria;c__Alphaproteobacteria;o__Sphingomonadales;f__Sphingomonadaceae;g__Sphingorhabdus_B	iphop	c__Alphaproteobacteria	g__Sphingorhabdus_B	o__Sphingomonadales
1-1_NODE_4448	NA	d__Bacteria;p__Proteobacteria;c__Gammaproteobacteria;o__Burkholderiales;f__Burkholderiaceae;g__Comamonas	iphop	c__Gammaproteobacteria	g__Comamonas	o__Burkholderiales
1-1_NODE_4570	NA	d__Bacteria;p__Proteobacteria;c__Alphaproteobacteria;o__Rhizobiales;f__Rhizobiaceae;g__Pararhizobium	iphop	c__Alphaproteobacteria	g__Pararhizobium	o__Rhizobiales
1-1_NODE_460_1	NA	d__Bacteria;p__Proteobacteria;c__Alphaproteobacteria;o__Rhizobiales;f__Beijerinckiaceae;g__Methylobacterium	iphop	c__Alphaproteobacteria	g__Methylobacterium	o__Rhizobiales
1-1_NODE_4709	NA	d__Bacteria;p__Actinobacteriota;c__Actinomycetia;o__Actinomycetales;f__Microbacteriaceae;g__Microbacterium	iphop	c__Actinomycetia	g__Microbacterium	o__Actinomycetales
1-1_NODE_4831	NA	d__Bacteria;p__Actinobacteriota;c__Actinomycetia;o__Actinomycetales;f__Microbacteriaceae;g__Microbacterium	iphop	c__Actinomycetia	g__Microbacterium	o__Actinomycetales
1-1_NODE_4883	NA	d__Bacteria;p__Proteobacteria;c__Alphaproteobacteria;o__Rhodobacterales;f__Rhodobacteraceae;g__Paracoccus	iphop	c__Alphaproteobacteria	g__Paracoccus	o__Rhodobacterales
1-1_NODE_4888	NA	d__Bacteria;p__Actinobacteriota;c__Actinomycetia;o__Propionibacteriales;f__Nocardioidaceae;g__Aeromicrobium	iphop	c__Actinomycetia	g__Aeromicrobium	o__Propionibacteriales
1-1_NODE_52_1	NA	d__Bacteria;p__Actinobacteriota;c__Actinomycetia;o__Mycobacteriales;f__Mycobacteriaceae;g__Rhodococcus_B	iphop	c__Actinomycetia	g__Rhodococcus_B	o__Mycobacteriales
1-1_NODE_549_fragment_1_1	NA	d__Bacteria;p__Bacteroidota;c__Bacteroidia;o__Cytophagales;f__Spirosomaceae;g__Larkinella	iphop	c__Bacteroidia	g__Larkinella	o__Cytophagales
1-1_NODE_626	NA	d__Bacteria;p__Proteobacteria;c__Alphaproteobacteria;o__Rhizobiales;f__Xanthobacteraceae;g__Pseudolabrys	iphop	c__Alphaproteobacteria	g__Pseudolabrys	o__Rhizobiales
1-1_NODE_648	NA	d__Bacteria;p__Actinobacteriota;c__Actinomycetia;o__Streptomycetales;f__Streptomycetaceae;g__Streptomyces	iphop	c__Actinomycetia	g__Streptomyces	o__Streptomycetales
1-1_NODE_649	NA	d__Bacteria;p__Actinobacteriota;c__Actinomycetia;o__Streptomycetales;f__Streptomycetaceae;g__Streptomyces	iphop	c__Actinomycetia	g__Streptomyces	o__Streptomycetales
1-1_NODE_681	NA	d__Bacteria;p__Actinobacteriota;c__Actinomycetia;o__Mycobacteriales;f__Mycobacteriaceae;g__Corynebacterium	iphop	c__Actinomycetia	g__Corynebacterium	o__Mycobacteriales
1-1_NODE_729_fragment_2	NA	d__Bacteria;p__Proteobacteria;c__Alphaproteobacteria;o__Rhizobiales;f__Beijerinckiaceae;g__Methylobacterium	iphop	c__Alphaproteobacteria	g__Methylobacterium	o__Rhizobiales
1-1_NODE_860_fragment_1	NA	d__Bacteria;p__Proteobacteria;c__Alphaproteobacteria;o__Sphingomonadales;f__Sphingomonadaceae;g__Sphingomonas	iphop	c__Alphaproteobacteria	g__Sphingomonas	o__Sphingomonadales
1-1_NODE_8964_1	NA	d__Bacteria;p__Actinobacteriota;c__Actinomycetia;o__Propionibacteriales;f__Nocardioidaceae;g__Nocardioides	iphop	c__Actinomycetia	g__Nocardioides	o__Propionibacteriales
1-1_NODE_903	NA	d__Bacteria;p__Proteobacteria;c__Alphaproteobacteria;o__Rhizobiales;f__Rhizobiaceae;g__Rhizobium	iphop	c__Alphaproteobacteria	g__Rhizobium	o__Rhizobiales
1-1_NODE_923	NA	d__Bacteria;p__Actinobacteriota;c__Actinomycetia;o__Mycobacteriales;f__Mycobacteriaceae;g__Rhodococcus	iphop	c__Actinomycetia	g__Rhodococcus	o__Mycobacteriales
1-4_NODE_1001	NA	d__Bacteria;p__Actinobacteriota;c__Actinomycetia;o__Mycobacteriales;f__Mycobacteriaceae;g__Mycobacterium	iphop	c__Actinomycetia	g__Mycobacterium	o__Mycobacteriales
1-4_NODE_1181	NA	d__Bacteria;p__Actinobacteriota;c__Actinomycetia;o__Actinomycetales;f__Microbacteriaceae;g__Microbacterium	iphop	c__Actinomycetia	g__Microbacterium	o__Actinomycetales
1-4_NODE_1204	NA	d__Bacteria;p__Actinobacteriota;c__Actinomycetia;o__Mycobacteriales;f__Mycobacteriaceae;g__Mycobacterium	iphop	c__Actinomycetia	g__Mycobacterium	o__Mycobacteriales
1-4_NODE_1272	NA	d__Bacteria;p__Actinobacteriota;c__Actinomycetia;o__Propionibacteriales;f__Nocardioidaceae;g__Nocardioides	iphop	c__Actinomycetia	g__Nocardioides	o__Propionibacteriales
1-4_NODE_1279	NA	d__Bacteria;p__Actinobacteriota;c__Actinomycetia;o__Mycobacteriales;f__Mycobacteriaceae;g__Mycobacterium	iphop	c__Actinomycetia	g__Mycobacterium	o__Mycobacteriales
1-4_NODE_1281	NA	d__Bacteria;p__Proteobacteria;c__Alphaproteobacteria;o__Rhizobiales;f__Beijerinckiaceae;g__Methylobacterium	iphop	c__Alphaproteobacteria	g__Methylobacterium	o__Rhizobiales
1-4_NODE_1396	NA	d__Bacteria;p__Chloroflexota;c__Anaerolineae;o__SBR1031;f__A4b;g__UBA6055	iphop	c__Anaerolineae	g__UBA6055	o__SBR1031
1-4_NODE_14	NA	d__Bacteria;p__Actinobacteriota;c__Acidimicrobiia;o__Acidimicrobiales;f__Ilumatobacteraceae;g__UBA2093	iphop	c__Acidimicrobiia	g__UBA2093	o__Acidimicrobiales
1-4_NODE_151	NA	d__Bacteria;p__Proteobacteria;c__Alphaproteobacteria;o__Rhizobiales;f__Xanthobacteraceae;g__Bradyrhizobium	iphop	c__Alphaproteobacteria	g__Bradyrhizobium	o__Rhizobiales
1-4_NODE_152	NA	d__Bacteria;p__Actinobacteriota;c__Actinomycetia;o__Mycobacteriales;f__Mycobacteriaceae;g__Mycobacterium	iphop	c__Actinomycetia	g__Mycobacterium	o__Mycobacteriales
1-4_NODE_156	NA	d__Bacteria;p__Proteobacteria;c__Alphaproteobacteria;o__Caulobacterales;f__Caulobacteraceae;g__Phenylobacterium	iphop	c__Alphaproteobacteria	g__Phenylobacterium	o__Caulobacterales
1-4_NODE_1566	NA	d__Bacteria;p__Bacteroidota;c__Bacteroidia;o__Flavobacteriales;f__Flavobacteriaceae;g__Flavobacterium	iphop	c__Bacteroidia	g__Flavobacterium	o__Flavobacteriales
1-4_NODE_160	NA	d__Bacteria;p__Bacteroidota;c__Bacteroidia;o__Flavobacteriales;f__Flavobacteriaceae;g__Flavobacterium	iphop	c__Bacteroidia	g__Flavobacterium	o__Flavobacteriales
1-4_NODE_1678	NA	d__Bacteria;p__Actinobacteriota;c__Actinomycetia;o__Actinomycetales;f__Micrococcaceae;g__Pseudarthrobacter	iphop	c__Actinomycetia	g__Pseudarthrobacter	o__Actinomycetales
1-4_NODE_1905	NA	d__Bacteria;p__Actinobacteriota;c__Actinomycetia;o__Propionibacteriales;f__Nocardioidaceae;g__Aeromicrobium	iphop	c__Actinomycetia	g__Aeromicrobium	o__Propionibacteriales
1-4_NODE_2061_1	NA	d__Bacteria;p__Actinobacteriota;c__Actinomycetia;o__Actinomycetales;f__Microbacteriaceae;g__Microbacterium	iphop	c__Actinomycetia	g__Microbacterium	o__Actinomycetales
1-4_NODE_2063	NA	d__Bacteria;p__Proteobacteria;c__Gammaproteobacteria;o__Burkholderiales;f__Burkholderiaceae;g__Variovorax	iphop	c__Gammaproteobacteria	g__Variovorax	o__Burkholderiales
1-4_NODE_2093	NA	d__Bacteria;p__Bacteroidota;c__Bacteroidia;o__Bacteroidales;f__Bacteroidaceae;g__Bacteroides	iphop	c__Bacteroidia	g__Bacteroides	o__Bacteroidales
1-4_NODE_2147	NA	d__Bacteria;p__Firmicutes;c__Bacilli;o__Staphylococcales;f__Staphylococcaceae;g__Staphylococcus	iphop	c__Bacilli	g__Staphylococcus	o__Staphylococcales
1-4_NODE_2155	NA	d__Bacteria;p__Actinobacteriota;c__Actinomycetia;o__Actinomycetales;f__Microbacteriaceae;g__Leucobacter	iphop	c__Actinomycetia	g__Leucobacter	o__Actinomycetales
1-4_NODE_2337	NA	d__Bacteria;p__Firmicutes;c__Bacilli;o__ML615J-28;f__CAG-313;g__DUOG01	iphop	c__Bacilli	g__DUOG01	o__ML615J-28
1-4_NODE_238	NA	d__Bacteria;p__Bacteroidota;c__Bacteroidia;o__Bacteroidales;f__Bacteroidaceae;g__Bacteroides	iphop	c__Bacteroidia	g__Bacteroides	o__Bacteroidales
1-4_NODE_240_fragment_1	NA	d__Bacteria;p__Actinobacteriota;c__Actinomycetia;o__Mycobacteriales;f__Mycobacteriaceae;g__Rhodococcus	iphop	c__Actinomycetia	g__Rhodococcus	o__Mycobacteriales
1-4_NODE_2518	NA	d__Bacteria;p__Actinobacteriota;c__Actinomycetia;o__Propionibacteriales;f__Nocardioidaceae;g__Nocardioides	iphop	c__Actinomycetia	g__Nocardioides	o__Propionibacteriales
1-4_NODE_267	NA	d__Bacteria;p__Planctomycetota;c__Phycisphaerae;o__UBA1845;f__UTPLA1;g__PLA4	iphop	c__Phycisphaerae	g__PLA4	o__UBA1845
1-4_NODE_276_fragment_2	NA	d__Bacteria;p__Patescibacteria;c__Saccharimonadia;o__Saccharimonadales;f__Saccharimonadaceae;g__UBA6175	iphop	c__Saccharimonadia	g__UBA6175	o__Saccharimonadales
1-4_NODE_283	NA	d__Bacteria;p__Proteobacteria;c__Gammaproteobacteria;o__Burkholderiales;f__Burkholderiaceae;g__Variovorax	iphop	c__Gammaproteobacteria	g__Variovorax	o__Burkholderiales
1-4_NODE_287	NA	d__Bacteria;p__Bacteroidota;c__Bacteroidia;o__Flavobacteriales;f__Flavobacteriaceae;g__Flavobacterium	iphop	c__Bacteroidia	g__Flavobacterium	o__Flavobacteriales
1-4_NODE_301_fragment_1	NA	d__Bacteria;p__Proteobacteria;c__Gammaproteobacteria;o__Burkholderiales;f__Burkholderiaceae;g__Caballeronia	iphop	c__Gammaproteobacteria	g__Caballeronia	o__Burkholderiales
1-4_NODE_306	NA	d__Bacteria;p__Proteobacteria;c__Gammaproteobacteria;o__Burkholderiales;f__Neisseriaceae;g__Neisseria	iphop	c__Gammaproteobacteria	g__Neisseria	o__Burkholderiales
1-4_NODE_315	NA	d__Bacteria;p__Actinobacteriota;c__Actinomycetia;o__Actinomycetales;f__Microbacteriaceae;g__Microbacterium	iphop	c__Actinomycetia	g__Microbacterium	o__Actinomycetales
1-4_NODE_380	NA	d__Bacteria;p__Proteobacteria;c__Gammaproteobacteria;o__Burkholderiales;f__Burkholderiaceae;g__Polaromonas	iphop	c__Gammaproteobacteria	g__Polaromonas	o__Burkholderiales
1-4_NODE_390	NA	d__Bacteria;p__Proteobacteria;c__Gammaproteobacteria;o__Burkholderiales;f__Neisseriaceae;g__Neisseria	iphop	c__Gammaproteobacteria	g__Neisseria	o__Burkholderiales
1-4_NODE_396	NA	d__Bacteria;p__Proteobacteria;c__Gammaproteobacteria;o__Burkholderiales;f__Burkholderiaceae;g__Variovorax	iphop	c__Gammaproteobacteria	g__Variovorax	o__Burkholderiales
1-4_NODE_423	NA	d__Bacteria;p__Proteobacteria;c__Alphaproteobacteria;o__Rhizobiales;f__Rhizobiaceae;g__Rhizobium	iphop	c__Alphaproteobacteria	g__Rhizobium	o__Rhizobiales
1-4_NODE_450	NA	d__Bacteria;p__Proteobacteria;c__Gammaproteobacteria;o__Burkholderiales;f__Burkholderiaceae;g__Burkholderia	iphop	c__Gammaproteobacteria	g__Burkholderia	o__Burkholderiales
1-4_NODE_554	NA	d__Bacteria;p__Proteobacteria;c__Alphaproteobacteria;o__Rhizobiales;f__Beijerinckiaceae;g__Bosea	iphop	c__Alphaproteobacteria	g__Bosea	o__Rhizobiales
1-4_NODE_59	NA	d__Bacteria;p__Bacteroidota;c__Bacteroidia;o__Flavobacteriales;f__Flavobacteriaceae;g__Flavobacterium	iphop	c__Bacteroidia	g__Flavobacterium	o__Flavobacteriales
1-4_NODE_616	NA	d__Bacteria;p__Proteobacteria;c__Gammaproteobacteria;o__Burkholderiales;f__Burkholderiaceae;g__Variovorax	iphop	c__Gammaproteobacteria	g__Variovorax	o__Burkholderiales
1-4_NODE_67	NA	d__Bacteria;p__Bacteroidota;c__Bacteroidia;o__Bacteroidales;f__Bacteroidaceae;g__Bacteroides	iphop	c__Bacteroidia	g__Bacteroides	o__Bacteroidales
1-4_NODE_7259_1	NA	d__Bacteria;p__Firmicutes;c__Bacilli;o__Lactobacillales;f__Lactobacillaceae;g__Companilactobacillus	iphop	c__Bacilli	g__Companilactobacillus	o__Lactobacillales
1-4_NODE_756	NA	d__Bacteria;p__Proteobacteria;c__Alphaproteobacteria;o__Rhizobiales;f__Beijerinckiaceae;g__Bosea	iphop	c__Alphaproteobacteria	g__Bosea	o__Rhizobiales
1-4_NODE_781	NA	d__Bacteria;p__Synergistota;c__Synergistia;o__Synergistales;f__Aminobacteriaceae;g__Aminivibrio	iphop	c__Synergistia	g__Aminivibrio	o__Synergistales
1-4_NODE_798	NA	d__Bacteria;p__Proteobacteria;c__Alphaproteobacteria;o__Sphingomonadales;f__Sphingomonadaceae;g__Novosphingobium	iphop	c__Alphaproteobacteria	g__Novosphingobium	o__Sphingomonadales
1-4_NODE_847	NA	d__Bacteria;p__Actinobacteriota;c__Actinomycetia;o__Actinomycetales;f__Dermatophilaceae;g__Janibacter	iphop	c__Actinomycetia	g__Janibacter	o__Actinomycetales
1-4_NODE_855	NA	d__Bacteria;p__Proteobacteria;c__Gammaproteobacteria;o__Burkholderiales;f__Burkholderiaceae;g__Variovorax	iphop	c__Gammaproteobacteria	g__Variovorax	o__Burkholderiales
1-8_NODE_1020	NA	d__Bacteria;p__Proteobacteria;c__Alphaproteobacteria;o__Rhizobiales;f__Methylopilaceae;g__Hansschlegelia	iphop	c__Alphaproteobacteria	g__Hansschlegelia	o__Rhizobiales
1-8_NODE_1074_fragment_1	NA	d__Bacteria;p__Proteobacteria;c__Alphaproteobacteria;o__Rhizobiales;f__Rhizobiaceae;g__Rhizobium_A	iphop	c__Alphaproteobacteria	g__Rhizobium_A	o__Rhizobiales
1-8_NODE_1148_1	NA	d__Bacteria;p__Proteobacteria;c__Gammaproteobacteria;o__Burkholderiales;f__Burkholderiaceae;g__Massilia	iphop	c__Gammaproteobacteria	g__Massilia	o__Burkholderiales
1-8_NODE_1160_fragment_1_1	NA	d__Bacteria;p__Actinobacteriota;c__Actinomycetia;o__Propionibacteriales;f__Nocardioidaceae;g__Nocardioides	iphop	c__Actinomycetia	g__Nocardioides	o__Propionibacteriales
1-8_NODE_1181	NA	d__Bacteria;p__Proteobacteria;c__Alphaproteobacteria;o__Rhizobiales;f__Beijerinckiaceae;g__Methylobacterium	iphop	c__Alphaproteobacteria	g__Methylobacterium	o__Rhizobiales
1-8_NODE_12106_1	NA	d__Bacteria;p__Proteobacteria;c__Alphaproteobacteria;o__Rhizobiales;f__Beijerinckiaceae;g__Methylobacterium	iphop	c__Alphaproteobacteria	g__Methylobacterium	o__Rhizobiales
1-8_NODE_1249	NA	d__Bacteria;p__Actinobacteriota;c__Actinomycetia;o__Actinomycetales;f__Microbacteriaceae;g__Microbacterium	iphop	c__Actinomycetia	g__Microbacterium	o__Actinomycetales
1-8_NODE_124_1	NA	d__Bacteria;p__Actinobacteriota;c__Actinomycetia;o__Actinomycetales;f__Microbacteriaceae;g__Microbacterium	iphop	c__Actinomycetia	g__Microbacterium	o__Actinomycetales
1-8_NODE_1327_fragment_1	NA	d__Bacteria;p__Proteobacteria;c__Alphaproteobacteria;o__Rhizobiales;f__Beijerinckiaceae;g__Methylobacterium	iphop	c__Alphaproteobacteria	g__Methylobacterium	o__Rhizobiales
1-8_NODE_1329	NA	d__Bacteria;p__Proteobacteria;c__Alphaproteobacteria;o__Rhizobiales;f__Beijerinckiaceae;g__Methylobacterium	iphop	c__Alphaproteobacteria	g__Methylobacterium	o__Rhizobiales
1-8_NODE_1382	NA	d__Bacteria;p__Proteobacteria;c__Alphaproteobacteria;o__Rhizobiales;f__Beijerinckiaceae;g__Methylobacterium	iphop	c__Alphaproteobacteria	g__Methylobacterium	o__Rhizobiales
1-8_NODE_1438_1	NA	d__Bacteria;p__Proteobacteria;c__Alphaproteobacteria;o__Rhizobiales;f__Beijerinckiaceae;g__Methylobacterium	iphop	c__Alphaproteobacteria	g__Methylobacterium	o__Rhizobiales
1-8_NODE_1453	NA	d__Bacteria;p__Proteobacteria;c__Alphaproteobacteria;o__Rhizobiales;f__Beijerinckiaceae;g__Methylobacterium	iphop	c__Alphaproteobacteria	g__Methylobacterium	o__Rhizobiales
1-8_NODE_14709_1	NA	d__Bacteria;p__Proteobacteria;c__Alphaproteobacteria;o__Sphingomonadales;f__Sphingomonadaceae;g__Sphingobium	iphop	c__Alphaproteobacteria	g__Sphingobium	o__Sphingomonadales
1-8_NODE_148_fragment_1	NA	d__Bacteria;p__Actinobacteriota;c__Actinomycetia;o__Mycobacteriales;f__Nakamurellaceae;g__Nakamurella	iphop	c__Actinomycetia	g__Nakamurella	o__Mycobacteriales
1-8_NODE_1557_fragment_1	NA	d__Bacteria;p__Proteobacteria;c__Alphaproteobacteria;o__Rhizobiales;f__Rhizobiaceae;g__Rhizobium	iphop	c__Alphaproteobacteria	g__Rhizobium	o__Rhizobiales
1-8_NODE_1631_fragment_1	NA	d__Bacteria;p__Proteobacteria;c__Alphaproteobacteria;o__Caulobacterales;f__Caulobacteraceae;g__Brevundimonas	iphop	c__Alphaproteobacteria	g__Brevundimonas	o__Caulobacterales
1-8_NODE_1658	NA	d__Bacteria;p__Proteobacteria;c__Alphaproteobacteria;o__Rhizobiales;f__Rhizobiaceae;g__Rhizobium	iphop	c__Alphaproteobacteria	g__Rhizobium	o__Rhizobiales
1-8_NODE_1674	NA	d__Bacteria;p__Proteobacteria;c__Alphaproteobacteria;o__Sphingomonadales;f__Sphingomonadaceae;g__Alteriqipengyuania	iphop	c__Alphaproteobacteria	g__Alteriqipengyuania	o__Sphingomonadales
1-8_NODE_1693	NA	d__Bacteria;p__Actinobacteriota;c__Actinomycetia;o__Propionibacteriales;f__Nocardioidaceae;g__Nocardioides	iphop	c__Actinomycetia	g__Nocardioides	o__Propionibacteriales
1-8_NODE_1841_fragment_1	NA	d__Bacteria;p__Actinobacteriota;c__Actinomycetia;o__Actinomycetales;f__Microbacteriaceae;g__Microbacterium	iphop	c__Actinomycetia	g__Microbacterium	o__Actinomycetales
1-8_NODE_1848	NA	d__Bacteria;p__Proteobacteria;c__Alphaproteobacteria;o__Rhizobiales;f__Beijerinckiaceae;g__Methylobacterium	iphop	c__Alphaproteobacteria	g__Methylobacterium	o__Rhizobiales
1-8_NODE_188_fragment_1_1	NA	d__Bacteria;p__Proteobacteria;c__Alphaproteobacteria;o__Rhizobiales;f__Beijerinckiaceae;g__Methylobacterium	iphop	c__Alphaproteobacteria	g__Methylobacterium	o__Rhizobiales
1-8_NODE_1934	NA	Unknown	iphop	Unknown	Unknown	Unknown
1-8_NODE_1995	NA	d__Bacteria;p__Proteobacteria;c__Alphaproteobacteria;o__Rhizobiales;f__Beijerinckiaceae;g__Methylobacterium	iphop	c__Alphaproteobacteria	g__Methylobacterium	o__Rhizobiales
1-8_NODE_2063	NA	d__Bacteria;p__Actinobacteriota;c__Actinomycetia;o__Mycobacteriales;f__Mycobacteriaceae;g__Rhodococcus	iphop	c__Actinomycetia	g__Rhodococcus	o__Mycobacteriales
1-8_NODE_2102	NA	d__Bacteria;p__Proteobacteria;c__Alphaproteobacteria;o__Rhizobiales;f__Beijerinckiaceae;g__Methylobacterium	iphop	c__Alphaproteobacteria	g__Methylobacterium	o__Rhizobiales
1-8_NODE_2132	NA	d__Bacteria;p__Actinobacteriota;c__Actinomycetia;o__Mycobacteriales;f__Pseudonocardiaceae;g__Pseudonocardia	iphop	c__Actinomycetia	g__Pseudonocardia	o__Mycobacteriales
1-8_NODE_2188	NA	d__Bacteria;p__Proteobacteria;c__Alphaproteobacteria;o__Rhizobiales;f__Beijerinckiaceae;g__Methylobacterium	iphop	c__Alphaproteobacteria	g__Methylobacterium	o__Rhizobiales
1-8_NODE_2196	NA	d__Bacteria;p__Proteobacteria;c__Gammaproteobacteria;o__Enterobacterales;f__Enterobacteriaceae;g__Dickeya	iphop	c__Gammaproteobacteria	g__Dickeya	o__Enterobacterales
1-8_NODE_2210	NA	d__Bacteria;p__Proteobacteria;c__Alphaproteobacteria;o__Rhizobiales;f__Beijerinckiaceae;g__Methylobacterium	iphop	c__Alphaproteobacteria	g__Methylobacterium	o__Rhizobiales
1-8_NODE_2342	NA	d__Bacteria;p__Proteobacteria;c__Alphaproteobacteria;o__Rhizobiales;f__Beijerinckiaceae;g__Methylobacterium	iphop	c__Alphaproteobacteria	g__Methylobacterium	o__Rhizobiales
1-8_NODE_237_fragment_1	NA	d__Bacteria;p__Actinobacteriota;c__Thermoleophilia;o__Solirubrobacterales;f__Solirubrobacteraceae;g__Conexibacter	iphop	c__Thermoleophilia	g__Conexibacter	o__Solirubrobacterales
1-8_NODE_241	NA	d__Bacteria;p__Actinobacteriota;c__Actinomycetia;o__Streptomycetales;f__Streptomycetaceae;g__Streptomyces	iphop	c__Actinomycetia	g__Streptomyces	o__Streptomycetales
1-8_NODE_2439_1	NA	d__Bacteria;p__Proteobacteria;c__Alphaproteobacteria;o__Rhizobiales;f__Beijerinckiaceae;g__Methylobacterium	iphop	c__Alphaproteobacteria	g__Methylobacterium	o__Rhizobiales
1-8_NODE_2472_fragment_1	NA	d__Bacteria;p__Patescibacteria;c__Saccharimonadia;o__Saccharimonadales;f__JACDFO01;g__JACDFO01	iphop	c__Saccharimonadia	g__JACDFO01	o__Saccharimonadales
1-8_NODE_268_fragment_2	NA	Unknown	iphop	Unknown	Unknown	Unknown
1-8_NODE_2755	NA	d__Bacteria;p__Actinobacteriota;c__Actinomycetia;o__Actinomycetales;f__Microbacteriaceae;g__Microbacterium	iphop	c__Actinomycetia	g__Microbacterium	o__Actinomycetales
1-8_NODE_2760	NA	d__Bacteria;p__Proteobacteria;c__Alphaproteobacteria;o__Rhizobiales;f__Beijerinckiaceae;g__Methylobacterium	iphop	c__Alphaproteobacteria	g__Methylobacterium	o__Rhizobiales
1-8_NODE_2808	NA	d__Bacteria;p__Proteobacteria;c__Alphaproteobacteria;o__Rhizobiales;f__Beijerinckiaceae;g__Methylobacterium	iphop	c__Alphaproteobacteria	g__Methylobacterium	o__Rhizobiales
1-8_NODE_2842	NA	d__Bacteria;p__Proteobacteria;c__Alphaproteobacteria;o__Rhizobiales;f__Beijerinckiaceae;g__Methylobacterium	iphop	c__Alphaproteobacteria	g__Methylobacterium	o__Rhizobiales
1-8_NODE_2974	NA	d__Bacteria;p__Proteobacteria;c__Alphaproteobacteria;o__Rhizobiales;f__Beijerinckiaceae;g__Methylobacterium	iphop	c__Alphaproteobacteria	g__Methylobacterium	o__Rhizobiales
1-8_NODE_29_fragment_1	NA	d__Bacteria;p__Actinobacteriota;c__Actinomycetia;o__Mycobacteriales;f__Mycobacteriaceae;g__Mycobacterium	iphop	c__Actinomycetia	g__Mycobacterium	o__Mycobacteriales
1-8_NODE_3029	NA	d__Bacteria;p__Proteobacteria;c__Alphaproteobacteria;o__Rhizobiales;f__Beijerinckiaceae;g__Methylobacterium	iphop	c__Alphaproteobacteria	g__Methylobacterium	o__Rhizobiales
1-8_NODE_305	NA	d__Bacteria;p__Proteobacteria;c__Alphaproteobacteria;o__Rhizobiales;f__Beijerinckiaceae;g__Methylobacterium	iphop	c__Alphaproteobacteria	g__Methylobacterium	o__Rhizobiales
1-8_NODE_3067	NA	d__Bacteria;p__Actinobacteriota;c__Actinomycetia;o__Mycobacteriales;f__Mycobacteriaceae;g__Mycobacterium	iphop	c__Actinomycetia	g__Mycobacterium	o__Mycobacteriales
1-8_NODE_3185	NA	d__Bacteria;p__Proteobacteria;c__Alphaproteobacteria;o__Rhizobiales;f__Beijerinckiaceae;g__Methylobacterium	iphop	c__Alphaproteobacteria	g__Methylobacterium	o__Rhizobiales
1-8_NODE_3219	NA	d__Bacteria;p__Actinobacteriota;c__Actinomycetia;o__Actinomycetales;f__Microbacteriaceae;g__Microbacterium	iphop	c__Actinomycetia	g__Microbacterium	o__Actinomycetales
1-8_NODE_3221	NA	d__Bacteria;p__Proteobacteria;c__Alphaproteobacteria;o__Rhizobiales;f__Beijerinckiaceae;g__Methylobacterium	iphop	c__Alphaproteobacteria	g__Methylobacterium	o__Rhizobiales
1-8_NODE_3226	NA	d__Bacteria;p__Proteobacteria;c__Alphaproteobacteria;o__Rhizobiales;f__Beijerinckiaceae;g__Methylobacterium	iphop	c__Alphaproteobacteria	g__Methylobacterium	o__Rhizobiales
1-8_NODE_3359	NA	d__Bacteria;p__Proteobacteria;c__Alphaproteobacteria;o__Rhizobiales;f__Beijerinckiaceae;g__Methylobacterium	iphop	c__Alphaproteobacteria	g__Methylobacterium	o__Rhizobiales
1-8_NODE_3369	NA	Unknown	iphop	Unknown	Unknown	Unknown
1-8_NODE_3381	NA	d__Bacteria;p__Actinobacteriota;c__Thermoleophilia;o__Solirubrobacterales;f__Solirubrobacteraceae;g__Conexibacter	iphop	c__Thermoleophilia	g__Conexibacter	o__Solirubrobacterales
1-8_NODE_3434	NA	Unknown	iphop	Unknown	Unknown	Unknown
1-8_NODE_3458	NA	d__Bacteria;p__Proteobacteria;c__Alphaproteobacteria;o__Rhizobiales;f__Beijerinckiaceae;g__Methylobacterium	iphop	c__Alphaproteobacteria	g__Methylobacterium	o__Rhizobiales
1-8_NODE_3482	NA	d__Bacteria;p__Proteobacteria;c__Alphaproteobacteria;o__Sphingomonadales;f__Sphingomonadaceae;g__Sphingomonas	iphop	c__Alphaproteobacteria	g__Sphingomonas	o__Sphingomonadales
1-8_NODE_348_fragment_2	NA	d__Bacteria;p__Proteobacteria;c__Alphaproteobacteria;o__Rhizobiales;f__Beijerinckiaceae;g__Methylobacterium	iphop	c__Alphaproteobacteria	g__Methylobacterium	o__Rhizobiales
1-8_NODE_3661	NA	d__Bacteria;p__Proteobacteria;c__Gammaproteobacteria;o__Burkholderiales;f__Burkholderiaceae;g__Massilia	iphop	c__Gammaproteobacteria	g__Massilia	o__Burkholderiales
1-8_NODE_3694	NA	d__Bacteria;p__Proteobacteria;c__Alphaproteobacteria;o__Rhizobiales;f__Beijerinckiaceae;g__Methylobacterium	iphop	c__Alphaproteobacteria	g__Methylobacterium	o__Rhizobiales
1-8_NODE_3699	NA	d__Bacteria;p__Proteobacteria;c__Alphaproteobacteria;o__Rhizobiales;f__Beijerinckiaceae;g__Methylobacterium	iphop	c__Alphaproteobacteria	g__Methylobacterium	o__Rhizobiales
1-8_NODE_36_1	NA	d__Bacteria;p__Proteobacteria;c__Alphaproteobacteria;o__Rhizobiales;f__Beijerinckiaceae;g__Methylobacterium	iphop	c__Alphaproteobacteria	g__Methylobacterium	o__Rhizobiales
1-8_NODE_3748	NA	d__Bacteria;p__Proteobacteria;c__Alphaproteobacteria;o__Rhizobiales;f__Beijerinckiaceae;g__Methylobacterium	iphop	c__Alphaproteobacteria	g__Methylobacterium	o__Rhizobiales
1-8_NODE_3806	NA	d__Bacteria;p__Proteobacteria;c__Alphaproteobacteria;o__Rhizobiales;f__Rhizobiaceae;g__Sinorhizobium	iphop	c__Alphaproteobacteria	g__Sinorhizobium	o__Rhizobiales
1-8_NODE_3864	NA	d__Bacteria;p__Proteobacteria;c__Alphaproteobacteria;o__Rhizobiales;f__Rhizobiaceae;g__Shinella	iphop	c__Alphaproteobacteria	g__Shinella	o__Rhizobiales
1-8_NODE_4005	NA	d__Bacteria;p__Actinobacteriota;c__Actinomycetia;o__Mycobacteriales;f__Micromonosporaceae;g__Micromonospora	iphop	c__Actinomycetia	g__Micromonospora	o__Mycobacteriales
1-8_NODE_4062	NA	d__Bacteria;p__Proteobacteria;c__Alphaproteobacteria;o__Rhizobiales;f__Beijerinckiaceae;g__Methylobacterium	iphop	c__Alphaproteobacteria	g__Methylobacterium	o__Rhizobiales
1-8_NODE_4064	NA	d__Bacteria;p__Proteobacteria;c__Alphaproteobacteria;o__Rhizobiales;f__Beijerinckiaceae;g__Methylobacterium	iphop	c__Alphaproteobacteria	g__Methylobacterium	o__Rhizobiales
1-8_NODE_450	NA	Unknown	iphop	Unknown	Unknown	Unknown
1-8_NODE_4845_1	NA	d__Bacteria;p__Proteobacteria;c__Alphaproteobacteria;o__Rhizobiales;f__Beijerinckiaceae;g__Methylobacterium	iphop	c__Alphaproteobacteria	g__Methylobacterium	o__Rhizobiales
1-8_NODE_497_fragment_1	NA	d__Bacteria;p__Proteobacteria;c__Alphaproteobacteria;o__Rhizobiales;f__Beijerinckiaceae;g__Methylobacterium	iphop	c__Alphaproteobacteria	g__Methylobacterium	o__Rhizobiales
1-8_NODE_55_fragment_2	NA	d__Bacteria;p__Proteobacteria;c__Alphaproteobacteria;o__Sphingomonadales;f__Sphingomonadaceae;g__Rhizorhabdus	iphop	c__Alphaproteobacteria	g__Rhizorhabdus	o__Sphingomonadales
1-8_NODE_56_fragment_1_1	NA	d__Bacteria;p__Actinobacteriota;c__Actinomycetia;o__Mycobacteriales;f__Mycobacteriaceae;g__Mycobacterium	iphop	c__Actinomycetia	g__Mycobacterium	o__Mycobacteriales
1-8_NODE_596	NA	d__Bacteria;p__Actinobacteriota;c__Actinomycetia;o__Mycobacteriales;f__Pseudonocardiaceae;g__Pseudonocardia	iphop	c__Actinomycetia	g__Pseudonocardia	o__Mycobacteriales
1-8_NODE_602_fragment_2	NA	d__Bacteria;p__Proteobacteria;c__Alphaproteobacteria;o__Rhizobiales;f__Beijerinckiaceae;g__Methylobacterium	iphop	c__Alphaproteobacteria	g__Methylobacterium	o__Rhizobiales
1-8_NODE_615_fragment_1	NA	d__Bacteria;p__Actinobacteriota;c__Actinomycetia;o__Actinomycetales;f__Microbacteriaceae;g__Microbacterium	iphop	c__Actinomycetia	g__Microbacterium	o__Actinomycetales
1-8_NODE_622_fragment_1	NA	d__Bacteria;p__Patescibacteria;c__Saccharimonadia;o__Saccharimonadales;f__Saccharimonadaceae;g__UBA1020	iphop	c__Saccharimonadia	g__UBA1020	o__Saccharimonadales
1-8_NODE_676_fragment_1_1	NA	d__Bacteria;p__Actinobacteriota;c__Actinomycetia;o__Mycobacteriales;f__Micromonosporaceae;g__Micromonospora	iphop	c__Actinomycetia	g__Micromonospora	o__Mycobacteriales
1-8_NODE_709_fragment_1	NA	d__Bacteria;p__Actinobacteriota;c__Actinomycetia;o__Propionibacteriales;f__Nocardioidaceae;g__Nocardioides	iphop	c__Actinomycetia	g__Nocardioides	o__Propionibacteriales
1-8_NODE_76	NA	d__Bacteria;p__Actinobacteriota;c__Thermoleophilia;o__Solirubrobacterales;f__Solirubrobacteraceae;g__Conexibacter	iphop	c__Thermoleophilia	g__Conexibacter	o__Solirubrobacterales
1-8_NODE_762_fragment_1_1	NA	d__Bacteria;p__Proteobacteria;c__Alphaproteobacteria;o__Rhodobacterales;f__Rhodobacteraceae;g__Paracoccus	iphop	c__Alphaproteobacteria	g__Paracoccus	o__Rhodobacterales
1-8_NODE_767	NA	d__Bacteria;p__Proteobacteria;c__Alphaproteobacteria;o__Rhizobiales;f__Beijerinckiaceae;g__Methylobacterium	iphop	c__Alphaproteobacteria	g__Methylobacterium	o__Rhizobiales
1-8_NODE_768_fragment_1	NA	d__Bacteria;p__Actinobacteriota;c__Actinomycetia;o__Actinomycetales;f__Microbacteriaceae;g__Microbacterium	iphop	c__Actinomycetia	g__Microbacterium	o__Actinomycetales
1-8_NODE_7785_1	NA	d__Bacteria;p__Actinobacteriota;c__Actinomycetia;o__Actinomycetales;f__Microbacteriaceae;g__Microbacterium	iphop	c__Actinomycetia	g__Microbacterium	o__Actinomycetales
1-8_NODE_7799_1	NA	d__Bacteria;p__Proteobacteria;c__Alphaproteobacteria;o__Rhizobiales;f__Beijerinckiaceae;g__Methylobacterium	iphop	c__Alphaproteobacteria	g__Methylobacterium	o__Rhizobiales
1-8_NODE_7805_1	NA	d__Bacteria;p__Proteobacteria;c__Alphaproteobacteria;o__Rhizobiales;f__Beijerinckiaceae;g__Methylobacterium	iphop	c__Alphaproteobacteria	g__Methylobacterium	o__Rhizobiales
1-8_NODE_7_fragment_1	NA	Unknown	iphop	Unknown	Unknown	Unknown
1-8_NODE_7_fragment_5	NA	Unknown	iphop	Unknown	Unknown	Unknown
1-8_NODE_7_fragment_9	NA	Unknown	iphop	Unknown	Unknown	Unknown
1-8_NODE_808_fragment_1	NA	d__Bacteria;p__Proteobacteria;c__Alphaproteobacteria;o__Rhizobiales;f__Beijerinckiaceae;g__Methylobacterium	iphop	c__Alphaproteobacteria	g__Methylobacterium	o__Rhizobiales
1-8_NODE_818_fragment_2	NA	d__Bacteria;p__Proteobacteria;c__Alphaproteobacteria;o__Caulobacterales;f__Caulobacteraceae;g__Brevundimonas	iphop	c__Alphaproteobacteria	g__Brevundimonas	o__Caulobacterales
1-8_NODE_842_fragment_1	NA	d__Bacteria;p__Proteobacteria;c__Alphaproteobacteria;o__Rhizobiales;f__Beijerinckiaceae;g__Methylobacterium	iphop	c__Alphaproteobacteria	g__Methylobacterium	o__Rhizobiales
1-8_NODE_897	NA	d__Bacteria;p__Actinobacteriota;c__Actinomycetia;o__Streptomycetales;f__Streptomycetaceae;g__Streptomyces	iphop	c__Actinomycetia	g__Streptomyces	o__Streptomycetales
1-8_NODE_964	NA	d__Bacteria;p__Proteobacteria;c__Alphaproteobacteria;o__Rhizobiales;f__Beijerinckiaceae;g__Methylobacterium	iphop	c__Alphaproteobacteria	g__Methylobacterium	o__Rhizobiales
1-8_NODE_9782_1	NA	d__Bacteria;p__Actinobacteriota;c__Actinomycetia;o__Actinomycetales;f__Microbacteriaceae;g__Microbacterium	iphop	c__Actinomycetia	g__Microbacterium	o__Actinomycetales
1-8_NODE_988_fragment_1	NA	d__Bacteria;p__Actinobacteriota;c__Actinomycetia;o__Mycobacteriales;f__Pseudonocardiaceae;g__Pseudonocardia	iphop	c__Actinomycetia	g__Pseudonocardia	o__Mycobacteriales
2-4_NODE_1022	NA	d__Bacteria;p__Proteobacteria;c__Alphaproteobacteria;o__Sphingomonadales;f__Sphingomonadaceae;g__Sphingobium	iphop	c__Alphaproteobacteria	g__Sphingobium	o__Sphingomonadales
2-4_NODE_10361_1	NA	d__Bacteria;p__Actinobacteriota;c__Actinomycetia;o__Actinomycetales;f__Micrococcaceae;g__Arthrobacter_I	iphop	c__Actinomycetia	g__Arthrobacter_I	o__Actinomycetales
2-4_NODE_1068	NA	d__Bacteria;p__Proteobacteria;c__Gammaproteobacteria;o__Burkholderiales;f__Burkholderiaceae;g__Variovorax	iphop	c__Gammaproteobacteria	g__Variovorax	o__Burkholderiales
2-4_NODE_1078	NA	d__Bacteria;p__Proteobacteria;c__Gammaproteobacteria;o__Xanthomonadales;f__Xanthomonadaceae;g__Arenimonas	iphop	c__Gammaproteobacteria	g__Arenimonas	o__Xanthomonadales
2-4_NODE_1102	NA	d__Bacteria;p__Proteobacteria;c__Gammaproteobacteria;o__Enterobacterales;f__Enterobacteriaceae;g__Edaphovirga	iphop	c__Gammaproteobacteria	g__Edaphovirga	o__Enterobacterales
2-4_NODE_1108	NA	d__Bacteria;p__Proteobacteria;c__Gammaproteobacteria;o__Enterobacterales;f__Enterobacteriaceae;g__Serratia	iphop	c__Gammaproteobacteria	g__Serratia	o__Enterobacterales
2-4_NODE_11589_1	NA	d__Bacteria;p__Proteobacteria;c__Alphaproteobacteria;o__Caulobacterales;f__Caulobacteraceae;g__Brevundimonas	iphop	c__Alphaproteobacteria	g__Brevundimonas	o__Caulobacterales
2-4_NODE_1170	NA	d__Bacteria;p__Proteobacteria;c__Gammaproteobacteria;o__Burkholderiales;f__Burkholderiaceae;g__Ramlibacter	iphop	c__Gammaproteobacteria	g__Ramlibacter	o__Burkholderiales
2-4_NODE_1216	NA	d__Bacteria;p__Proteobacteria;c__Gammaproteobacteria;o__Burkholderiales;f__Burkholderiaceae;g__Variovorax	iphop	c__Gammaproteobacteria	g__Variovorax	o__Burkholderiales
2-4_NODE_12213_1	NA	d__Bacteria;p__Acidobacteriota;c__Acidobacteriae;o__Acidobacteriales;f__Koribacteraceae;g__Sulfotelmatobacter	iphop	c__Acidobacteriae	g__Sulfotelmatobacter	o__Acidobacteriales
2-4_NODE_1240	NA	d__Bacteria;p__Actinobacteriota;c__Actinomycetia;o__Mycobacteriales;f__Mycobacteriaceae;g__Mycobacterium	iphop	c__Actinomycetia	g__Mycobacterium	o__Mycobacteriales
2-4_NODE_1291_fragment_1	NA	d__Bacteria;p__Actinobacteriota;c__Actinomycetia;o__Propionibacteriales;f__Nocardioidaceae;g__Aeromicrobium	iphop	c__Actinomycetia	g__Aeromicrobium	o__Propionibacteriales
2-4_NODE_1322	NA	d__Bacteria;p__Actinobacteriota;c__Actinomycetia;o__Mycobacteriales;f__Mycobacteriaceae;g__Mycobacterium	iphop	c__Actinomycetia	g__Mycobacterium	o__Mycobacteriales
2-4_NODE_1362	NA	d__Bacteria;p__Proteobacteria;c__Alphaproteobacteria;o__Rhizobiales;f__Rhizobiaceae;g__Mesorhizobium	iphop	c__Alphaproteobacteria	g__Mesorhizobium	o__Rhizobiales
2-4_NODE_1373	NA	d__Bacteria;p__Bacteroidota;c__Bacteroidia;o__Bacteroidales;f__UBA932;g__RC9	iphop	c__Bacteroidia	g__RC9	o__Bacteroidales
2-4_NODE_1559	NA	d__Bacteria;p__Bacteroidota;c__Bacteroidia;o__Bacteroidales;f__Bacteroidaceae;g__Prevotella	iphop	c__Bacteroidia	g__Prevotella	o__Bacteroidales
2-4_NODE_159	NA	d__Bacteria;p__Bacteroidota;c__Bacteroidia;o__Cytophagales;f__Cyclobacteriaceae;g__ELB16-189	iphop	c__Bacteroidia	g__ELB16-189	o__Cytophagales
2-4_NODE_1755	NA	d__Bacteria;p__Proteobacteria;c__Gammaproteobacteria;o__Enterobacterales;f__Enterobacteriaceae;g__Pectobacterium	iphop	c__Gammaproteobacteria	g__Pectobacterium	o__Enterobacterales
2-4_NODE_1783	NA	d__Bacteria;p__Actinobacteriota;c__Actinomycetia;o__Mycobacteriales;f__Micromonosporaceae;g__Actinoplanes	iphop	c__Actinomycetia	g__Actinoplanes	o__Mycobacteriales
2-4_NODE_1847	NA	d__Bacteria;p__Actinobacteriota;c__Actinomycetia;o__Mycobacteriales;f__Mycobacteriaceae;g__Mycobacterium	iphop	c__Actinomycetia	g__Mycobacterium	o__Mycobacteriales
2-4_NODE_1893	NA	d__Bacteria;p__Proteobacteria;c__Alphaproteobacteria;o__Sphingomonadales;f__Sphingomonadaceae;g__Parerythrobacter	iphop	c__Alphaproteobacteria	g__Parerythrobacter	o__Sphingomonadales
2-4_NODE_196	NA	d__Bacteria;p__Bacteroidota;c__Bacteroidia;o__Bacteroidales;f__Bacteroidaceae;g__Bacteroides	iphop	c__Bacteroidia	g__Bacteroides	o__Bacteroidales
2-4_NODE_196	NA	d__Bacteria;p__Bacteroidota;c__Bacteroidia;o__Flavobacteriales;f__Flavobacteriaceae;g__Flavobacterium	iphop	c__Bacteroidia	g__Flavobacterium	o__Flavobacteriales
2-4_NODE_2001	NA	d__Bacteria;p__Proteobacteria;c__Alphaproteobacteria;o__Rhizobiales;f__Rhizobiaceae;g__Aminobacter	iphop	c__Alphaproteobacteria	g__Aminobacter	o__Rhizobiales
2-4_NODE_2042	NA	d__Bacteria;p__Proteobacteria;c__Gammaproteobacteria;o__Burkholderiales;f__Burkholderiaceae;g__Hylemonella	iphop	c__Gammaproteobacteria	g__Hylemonella	o__Burkholderiales
2-4_NODE_2043	NA	d__Bacteria;p__Actinobacteriota;c__Actinomycetia;o__Streptomycetales;f__Streptomycetaceae;g__Streptomyces	iphop	c__Actinomycetia	g__Streptomyces	o__Streptomycetales
2-4_NODE_2151	NA	d__Bacteria;p__Proteobacteria;c__Gammaproteobacteria;o__Xanthomonadales;f__Xanthomonadaceae;g__Pseudoxanthomonas_A	iphop	c__Gammaproteobacteria	g__Pseudoxanthomonas_A	o__Xanthomonadales
2-4_NODE_2254	NA	d__Bacteria;p__Actinobacteriota;c__Actinomycetia;o__Streptomycetales;f__Streptomycetaceae;g__Streptomyces	iphop	c__Actinomycetia	g__Streptomyces	o__Streptomycetales
2-4_NODE_2275	NA	d__Bacteria;p__Proteobacteria;c__Gammaproteobacteria;o__Enterobacterales;f__Vibrionaceae;g__Vibrio	iphop	c__Gammaproteobacteria	g__Vibrio	o__Enterobacterales
2-4_NODE_2289	NA	d__Bacteria;p__Proteobacteria;c__Gammaproteobacteria;o__Burkholderiales;f__Burkholderiaceae;g__Variovorax	iphop	c__Gammaproteobacteria	g__Variovorax	o__Burkholderiales
2-4_NODE_2294	NA	d__Bacteria;p__Proteobacteria;c__Gammaproteobacteria;o__Burkholderiales;f__Burkholderiaceae;g__Acidovorax	iphop	c__Gammaproteobacteria	g__Acidovorax	o__Burkholderiales
2-4_NODE_2379	NA	Unknown	iphop	Unknown	Unknown	Unknown
2-4_NODE_2398	NA	d__Bacteria;p__Bacteroidota;c__Bacteroidia;o__Flavobacteriales;f__Flavobacteriaceae;g__Flavobacterium	iphop	c__Bacteroidia	g__Flavobacterium	o__Flavobacteriales
2-4_NODE_247	NA	d__Bacteria;p__Proteobacteria;c__Gammaproteobacteria;o__Burkholderiales;f__Burkholderiaceae;g__Variovorax	iphop	c__Gammaproteobacteria	g__Variovorax	o__Burkholderiales
2-4_NODE_2544	NA	d__Bacteria;p__Proteobacteria;c__Gammaproteobacteria;o__Pseudomonadales;f__Moraxellaceae;g__Acinetobacter	iphop	c__Gammaproteobacteria	g__Acinetobacter	o__Pseudomonadales
2-4_NODE_2837	NA	d__Bacteria;p__Actinobacteriota;c__Coriobacteriia;o__Coriobacteriales;f__Coriobacteriaceae;g__Collinsella	iphop	c__Coriobacteriia	g__Collinsella	o__Coriobacteriales
2-4_NODE_29653_1	NA	d__Bacteria;p__Actinobacteriota;c__Actinomycetia;o__Mycobacteriales;f__Mycobacteriaceae;g__Mycobacterium	iphop	c__Actinomycetia	g__Mycobacterium	o__Mycobacteriales
2-4_NODE_3004	NA	d__Bacteria;p__Actinobacteriota;c__Actinomycetia;o__Actinomycetales;f__Microbacteriaceae;g__Agromyces	iphop	c__Actinomycetia	g__Agromyces	o__Actinomycetales
2-4_NODE_3048	NA	d__Bacteria;p__Proteobacteria;c__Alphaproteobacteria;o__Rhizobiales;f__Xanthobacteraceae;g__Bradyrhizobium	iphop	c__Alphaproteobacteria	g__Bradyrhizobium	o__Rhizobiales
2-4_NODE_3099	NA	d__Bacteria;p__Actinobacteriota;c__Actinomycetia;o__Mycobacteriales;f__Mycobacteriaceae;g__Mycobacterium	iphop	c__Actinomycetia	g__Mycobacterium	o__Mycobacteriales
2-4_NODE_3177	NA	d__Bacteria;p__Proteobacteria;c__Gammaproteobacteria;o__Burkholderiales;f__Burkholderiaceae;g__Paraburkholderia	iphop	c__Gammaproteobacteria	g__Paraburkholderia	o__Burkholderiales
2-4_NODE_3279	NA	d__Bacteria;p__Proteobacteria;c__Gammaproteobacteria;o__Pseudomonadales;f__Moraxellaceae;g__Acinetobacter	iphop	c__Gammaproteobacteria	g__Acinetobacter	o__Pseudomonadales
2-4_NODE_3322	NA	d__Bacteria;p__Actinobacteriota;c__Actinomycetia;o__Propionibacteriales;f__Nocardioidaceae;g__Nocardioides_A	iphop	c__Actinomycetia	g__Nocardioides_A	o__Propionibacteriales
2-4_NODE_3334	NA	d__Bacteria;p__Firmicutes;c__Bacilli;o__Lactobacillales;f__Streptococcaceae;g__Streptococcus	iphop	c__Bacilli	g__Streptococcus	o__Lactobacillales
2-4_NODE_3379	NA	d__Bacteria;p__Proteobacteria;c__Alphaproteobacteria;o__Sphingomonadales;f__Sphingomonadaceae;g__Sphingobium	iphop	c__Alphaproteobacteria	g__Sphingobium	o__Sphingomonadales
2-4_NODE_3398	NA	d__Bacteria;p__Proteobacteria;c__Alphaproteobacteria;o__Sphingomonadales;f__Sphingomonadaceae;g__Novosphingobium	iphop	c__Alphaproteobacteria	g__Novosphingobium	o__Sphingomonadales
2-4_NODE_34	NA	d__Bacteria;p__Cyanobacteria;c__Cyanobacteriia;o__PCC-6307;f__Cyanobiaceae;g__Prochlorococcus_A	iphop	c__Cyanobacteriia	g__Prochlorococcus_A	o__PCC-6307
2-4_NODE_3478	NA	d__Bacteria;p__Actinobacteriota;c__Actinomycetia;o__Mycobacteriales;f__Mycobacteriaceae;g__Mycobacterium	iphop	c__Actinomycetia	g__Mycobacterium	o__Mycobacteriales
2-4_NODE_3561	NA	Unknown	iphop	Unknown	Unknown	Unknown
2-4_NODE_3742	NA	d__Bacteria;p__Proteobacteria;c__Gammaproteobacteria;o__Enterobacterales;f__Enterobacteriaceae;g__Lonsdalea	iphop	c__Gammaproteobacteria	g__Lonsdalea	o__Enterobacterales
2-4_NODE_3861	NA	d__Bacteria;p__Proteobacteria;c__Gammaproteobacteria;o__Pseudomonadales;f__Pseudomonadaceae;g__Pseudomonas_E	iphop	c__Gammaproteobacteria	g__Pseudomonas_E	o__Pseudomonadales
2-4_NODE_3876	NA	d__Bacteria;p__Proteobacteria;c__Gammaproteobacteria;o__Xanthomonadales;f__Rhodanobacteraceae;g__Rhodanobacter	iphop	c__Gammaproteobacteria	g__Rhodanobacter	o__Xanthomonadales
2-4_NODE_3921	NA	d__Bacteria;p__Actinobacteriota;c__Actinomycetia;o__Streptomycetales;f__Streptomycetaceae;g__Streptomyces	iphop	c__Actinomycetia	g__Streptomyces	o__Streptomycetales
2-4_NODE_4043	NA	d__Bacteria;p__Actinobacteriota;c__Actinomycetia;o__Streptomycetales;f__Streptomycetaceae;g__Streptomyces	iphop	c__Actinomycetia	g__Streptomyces	o__Streptomycetales
2-4_NODE_4093	NA	d__Bacteria;p__Patescibacteria;c__ABY1;o__BM507;f__UBA12465;g__UBA12465	iphop	c__ABY1	g__UBA12465	o__BM507
2-4_NODE_4164	NA	d__Bacteria;p__Planctomycetota;c__Phycisphaerae;o__UBA1845;f__UBA1845;g__JABFSN01	iphop	c__Phycisphaerae	g__JABFSN01	o__UBA1845
2-4_NODE_4164	NA	d__Bacteria;p__Planctomycetota;c__Planctomycetes;o__Pirellulales;f__Pirellulaceae;g__SKKK01	iphop	c__Planctomycetes	g__SKKK01	o__Pirellulales
2-4_NODE_4308	NA	d__Bacteria;p__Firmicutes;c__Bacilli;o__Lactobacillales;f__Streptococcaceae;g__Streptococcus	iphop	c__Bacilli	g__Streptococcus	o__Lactobacillales
2-4_NODE_4328	NA	d__Bacteria;p__Actinobacteriota;c__Actinomycetia;o__Mycobacteriales;f__Mycobacteriaceae;g__Mycobacterium	iphop	c__Actinomycetia	g__Mycobacterium	o__Mycobacteriales
2-4_NODE_490	NA	d__Bacteria;p__Actinobacteriota;c__Actinomycetia;o__Mycobacteriales;f__Micromonosporaceae;g__Micromonospora	iphop	c__Actinomycetia	g__Micromonospora	o__Mycobacteriales
2-4_NODE_508_fragment_1	NA	d__Bacteria;p__Actinobacteriota;c__Actinomycetia;o__Propionibacteriales;f__Nocardioidaceae;g__Aeromicrobium	iphop	c__Actinomycetia	g__Aeromicrobium	o__Propionibacteriales
2-4_NODE_559	NA	d__Bacteria;p__Proteobacteria;c__Gammaproteobacteria;o__Enterobacterales;f__Vibrionaceae;g__Vibrio	iphop	c__Gammaproteobacteria	g__Vibrio	o__Enterobacterales
2-4_NODE_583	NA	d__Bacteria;p__Proteobacteria;c__Gammaproteobacteria;o__Burkholderiales;f__Burkholderiaceae;g__Hydrogenophaga	iphop	c__Gammaproteobacteria	g__Hydrogenophaga	o__Burkholderiales
2-4_NODE_6306_1	NA	d__Bacteria;p__Proteobacteria;c__Gammaproteobacteria;o__Pseudomonadales;f__Moraxellaceae;g__Acinetobacter	iphop	c__Gammaproteobacteria	g__Acinetobacter	o__Pseudomonadales
2-4_NODE_659	NA	d__Bacteria;p__Proteobacteria;c__Alphaproteobacteria;o__Rhizobiales;f__Rhizobiaceae;g__Mesorhizobium	iphop	c__Alphaproteobacteria	g__Mesorhizobium	o__Rhizobiales
2-4_NODE_672	NA	d__Bacteria;p__Proteobacteria;c__Gammaproteobacteria;o__Burkholderiales;f__Burkholderiaceae;g__MESE01	iphop	c__Gammaproteobacteria	g__MESE01	o__Burkholderiales
2-4_NODE_673	NA	d__Bacteria;p__Actinobacteriota;c__Actinomycetia;o__Mycobacteriales;f__Mycobacteriaceae;g__Mycobacterium	iphop	c__Actinomycetia	g__Mycobacterium	o__Mycobacteriales
2-4_NODE_697	NA	d__Bacteria;p__Proteobacteria;c__Gammaproteobacteria;o__Burkholderiales;f__Burkholderiaceae;g__Rubrivivax	iphop	c__Gammaproteobacteria	g__Rubrivivax	o__Burkholderiales
2-4_NODE_700	NA	d__Bacteria;p__Proteobacteria;c__Alphaproteobacteria;o__Sphingomonadales;f__Sphingomonadaceae;g__Sphingopyxis	iphop	c__Alphaproteobacteria	g__Sphingopyxis	o__Sphingomonadales
2-4_NODE_724	NA	d__Bacteria;p__Actinobacteriota;c__Actinomycetia;o__Streptomycetales;f__Streptomycetaceae;g__Streptomyces	iphop	c__Actinomycetia	g__Streptomyces	o__Streptomycetales
2-4_NODE_794	NA	d__Bacteria;p__Proteobacteria;c__Alphaproteobacteria;o__Rhizobiales;f__Rhizobiaceae;g__Sinorhizobium	iphop	c__Alphaproteobacteria	g__Sinorhizobium	o__Rhizobiales
2-4_NODE_8	NA	d__Bacteria;p__Bacteroidota;c__Kapabacteria;o__Kapabacteriales;f__UBA2268;g__SpSt-478	iphop	c__Kapabacteria	g__SpSt-478	o__Kapabacteriales
2-4_NODE_823	NA	d__Bacteria;p__Proteobacteria;c__Gammaproteobacteria;o__Pseudomonadales;f__Pseudomonadaceae;g__Pseudomonas_E	iphop	c__Gammaproteobacteria	g__Pseudomonas_E	o__Pseudomonadales
2-4_NODE_856	NA	d__Bacteria;p__Proteobacteria;c__Alphaproteobacteria;o__Rhizobiales;f__Beijerinckiaceae;g__Bosea	iphop	c__Alphaproteobacteria	g__Bosea	o__Rhizobiales
2-4_NODE_893	NA	d__Bacteria;p__Actinobacteriota;c__Actinomycetia;o__Mycobacteriales;f__Mycobacteriaceae;g__Mycobacterium	iphop	c__Actinomycetia	g__Mycobacterium	o__Mycobacteriales
2-4_NODE_910	NA	d__Bacteria;p__Proteobacteria;c__Alphaproteobacteria;o__Rickettsiales;f__Anaplasmataceae;g__Neorickettsia	iphop	c__Alphaproteobacteria	g__Neorickettsia	o__Rickettsiales
2-4_NODE_950	NA	Unknown	iphop	Unknown	Unknown	Unknown
2-56_NODE_1008	NA	d__Bacteria;p__Proteobacteria;c__Gammaproteobacteria;o__Legionellales;f__Legionellaceae;g__Legionella	iphop	c__Gammaproteobacteria	g__Legionella	o__Legionellales
2-56_NODE_1042	NA	d__Bacteria;p__Proteobacteria;c__Gammaproteobacteria;o__Burkholderiales;f__Rhodocyclaceae;g__Thauera	iphop	c__Gammaproteobacteria	g__Thauera	o__Burkholderiales
2-56_NODE_1113	NA	d__Bacteria;p__Proteobacteria;c__Gammaproteobacteria;o__Burkholderiales;f__Burkholderiaceae;g__Variovorax	iphop	c__Gammaproteobacteria	g__Variovorax	o__Burkholderiales
2-56_NODE_1122	NA	d__Bacteria;p__Bacteroidota;c__Bacteroidia;o__Flavobacteriales;f__Flavobacteriaceae;g__Flavobacterium	iphop	c__Bacteroidia	g__Flavobacterium	o__Flavobacteriales
2-56_NODE_1139	NA	d__Bacteria;p__Proteobacteria;c__Gammaproteobacteria;o__Legionellales;f__Legionellaceae;g__Legionella	iphop	c__Gammaproteobacteria	g__Legionella	o__Legionellales
2-56_NODE_1186	NA	d__Bacteria;p__Proteobacteria;c__Gammaproteobacteria;o__Burkholderiales;f__Gallionellaceae;g__CAITJF01	iphop	c__Gammaproteobacteria	g__CAITJF01	o__Burkholderiales
2-56_NODE_1219	NA	d__Bacteria;p__Proteobacteria;c__Gammaproteobacteria;o__Burkholderiales;f__Burkholderiaceae;g__Variovorax	iphop	c__Gammaproteobacteria	g__Variovorax	o__Burkholderiales
2-56_NODE_1293	NA	Unknown	iphop	Unknown	Unknown	Unknown
2-56_NODE_1370	NA	d__Bacteria;p__Proteobacteria;c__Gammaproteobacteria;o__Burkholderiales;f__Burkholderiaceae;g__Comamonas	iphop	c__Gammaproteobacteria	g__Comamonas	o__Burkholderiales
2-56_NODE_1450	NA	d__Bacteria;p__Proteobacteria;c__Gammaproteobacteria;o__Methylococcales;f__Methylomonadaceae;g__Methylovulum	iphop	c__Gammaproteobacteria	g__Methylovulum	o__Methylococcales
2-56_NODE_1472_fragment_1	NA	d__Bacteria;p__Actinobacteriota;c__Actinomycetia;o__Actinomycetales;f__Microbacteriaceae;g__Microbacterium	iphop	c__Actinomycetia	g__Microbacterium	o__Actinomycetales
2-56_NODE_1488	NA	d__Bacteria;p__Proteobacteria;c__Gammaproteobacteria;o__Burkholderiales;f__Burkholderiaceae;g__Paraburkholderia	iphop	c__Gammaproteobacteria	g__Paraburkholderia	o__Burkholderiales
2-56_NODE_1569_1	NA	d__Bacteria;p__Actinobacteriota;c__Actinomycetia;o__Actinomycetales;f__Microbacteriaceae;g__Microbacterium	iphop	c__Actinomycetia	g__Microbacterium	o__Actinomycetales
2-56_NODE_1615	NA	d__Bacteria;p__Proteobacteria;c__Gammaproteobacteria;o__Burkholderiales;f__Burkholderiaceae;g__Diaphorobacter_A	iphop	c__Gammaproteobacteria	g__Diaphorobacter_A	o__Burkholderiales
2-56_NODE_1623	NA	d__Bacteria;p__Proteobacteria;c__Gammaproteobacteria;o__Enterobacterales;f__Enterobacteriaceae;g__Pectobacterium	iphop	c__Gammaproteobacteria	g__Pectobacterium	o__Enterobacterales
2-56_NODE_167	NA	d__Bacteria;p__Proteobacteria;c__Alphaproteobacteria;o__Rhizobiales;f__Rhizobiaceae;g__Agrobacterium	iphop	c__Alphaproteobacteria	g__Agrobacterium	o__Rhizobiales
2-56_NODE_1674	NA	d__Bacteria;p__Actinobacteriota;c__Actinomycetia;o__Actinomycetales;f__Microbacteriaceae;g__Microbacterium	iphop	c__Actinomycetia	g__Microbacterium	o__Actinomycetales
2-56_NODE_18	NA	d__Bacteria;p__Actinobacteriota;c__Actinomycetia;o__Actinomycetales;f__Microbacteriaceae;g__Microbacterium	iphop	c__Actinomycetia	g__Microbacterium	o__Actinomycetales
2-56_NODE_1825	NA	d__Bacteria;p__Proteobacteria;c__Gammaproteobacteria;o__Burkholderiales;f__Burkholderiaceae;g__Variovorax	iphop	c__Gammaproteobacteria	g__Variovorax	o__Burkholderiales
2-56_NODE_1880	NA	d__Bacteria;p__Proteobacteria;c__Gammaproteobacteria;o__Legionellales;f__Legionellaceae;g__Legionella	iphop	c__Gammaproteobacteria	g__Legionella	o__Legionellales
2-56_NODE_1904	NA	d__Bacteria;p__Bacteroidota;c__Bacteroidia;o__Flavobacteriales;f__Flavobacteriaceae;g__Flavobacterium	iphop	c__Bacteroidia	g__Flavobacterium	o__Flavobacteriales
2-56_NODE_1953	NA	d__Bacteria;p__Proteobacteria;c__Gammaproteobacteria;o__Enterobacterales;f__Vibrionaceae;g__Vibrio	iphop	c__Gammaproteobacteria	g__Vibrio	o__Enterobacterales
2-56_NODE_2232	NA	d__Bacteria;p__Firmicutes;c__Bacilli;o__Lactobacillales;f__Lactobacillaceae;g__Companilactobacillus	iphop	c__Bacilli	g__Companilactobacillus	o__Lactobacillales
2-56_NODE_2243	NA	d__Bacteria;p__Bacteroidota;c__Bacteroidia;o__Sphingobacteriales;f__Sphingobacteriaceae;g__Pedobacter	iphop	c__Bacteroidia	g__Pedobacter	o__Sphingobacteriales
2-56_NODE_229	NA	d__Bacteria;p__Proteobacteria;c__Gammaproteobacteria;o__Burkholderiales;f__Burkholderiaceae;g__UBA3064	iphop	c__Gammaproteobacteria	g__UBA3064	o__Burkholderiales
2-56_NODE_2307	NA	d__Bacteria;p__Bacteroidota;c__Bacteroidia;o__Chitinophagales;f__Saprospiraceae;g__Haliscomenobacter	iphop	c__Bacteroidia	g__Haliscomenobacter	o__Chitinophagales
2-56_NODE_2407	NA	d__Bacteria;p__Proteobacteria;c__Alphaproteobacteria;o__Rhizobiales;f__Beijerinckiaceae;g__Methylobacterium	iphop	c__Alphaproteobacteria	g__Methylobacterium	o__Rhizobiales
2-56_NODE_2414	NA	d__Bacteria;p__Actinobacteriota;c__Actinomycetia;o__Mycobacteriales;f__Mycobacteriaceae;g__Mycobacterium	iphop	c__Actinomycetia	g__Mycobacterium	o__Mycobacteriales
2-56_NODE_2453	NA	d__Bacteria;p__Actinobacteriota;c__Actinomycetia;o__Mycobacteriales;f__Mycobacteriaceae;g__Corynebacterium	iphop	c__Actinomycetia	g__Corynebacterium	o__Mycobacteriales
2-56_NODE_2464	NA	d__Bacteria;p__Bacteroidota;c__Bacteroidia;o__Bacteroidales;f__Bacteroidaceae;g__Bacteroides	iphop	c__Bacteroidia	g__Bacteroides	o__Bacteroidales
2-56_NODE_2472	NA	d__Bacteria;p__Proteobacteria;c__Gammaproteobacteria;o__Burkholderiales;f__Burkholderiaceae;g__Aquincola	iphop	c__Gammaproteobacteria	g__Aquincola	o__Burkholderiales
2-56_NODE_2678	NA	d__Bacteria;p__Bacteroidota;c__Bacteroidia;o__Bacteroidales;f__Bacteroidaceae;g__Prevotella	iphop	c__Bacteroidia	g__Prevotella	o__Bacteroidales
2-56_NODE_2710_fragment_1_1	NA	d__Bacteria;p__Proteobacteria;c__Alphaproteobacteria;o__Rhizobiales;f__Beijerinckiaceae;g__Methylobacterium	iphop	c__Alphaproteobacteria	g__Methylobacterium	o__Rhizobiales
2-56_NODE_280	NA	d__Bacteria;p__Actinobacteriota;c__Actinomycetia;o__Streptomycetales;f__Streptomycetaceae;g__Streptomyces	iphop	c__Actinomycetia	g__Streptomyces	o__Streptomycetales
2-56_NODE_2829	NA	d__Bacteria;p__Proteobacteria;c__Alphaproteobacteria;o__Rhizobiales;f__Hyphomicrobiaceae;g__AWTP1-13	iphop	c__Alphaproteobacteria	g__AWTP1-13	o__Rhizobiales
2-56_NODE_2839	NA	d__Bacteria;p__Verrucomicrobiota;c__Verrucomicrobiae;o__Verrucomicrobiales;f__Akkermansiaceae;g__UBA1315	iphop	c__Verrucomicrobiae	g__UBA1315	o__Verrucomicrobiales
2-56_NODE_2899	NA	d__Bacteria;p__Proteobacteria;c__Alphaproteobacteria;o__Rhizobiales;f__Beijerinckiaceae;g__Methylobacterium	iphop	c__Alphaproteobacteria	g__Methylobacterium	o__Rhizobiales
2-56_NODE_29210_1	NA	d__Bacteria;p__Actinobacteriota;c__Actinomycetia;o__Actinomycetales;f__Microbacteriaceae;g__Microbacterium	iphop	c__Actinomycetia	g__Microbacterium	o__Actinomycetales
2-56_NODE_3028	NA	d__Bacteria;p__Proteobacteria;c__Alphaproteobacteria;o__Sphingomonadales;f__Sphingomonadaceae;g__Sphingomonas	iphop	c__Alphaproteobacteria	g__Sphingomonas	o__Sphingomonadales
2-56_NODE_3073	NA	d__Bacteria;p__Actinobacteriota;c__Actinomycetia;o__Actinomycetales;f__Microbacteriaceae;g__Microbacterium	iphop	c__Actinomycetia	g__Microbacterium	o__Actinomycetales
2-56_NODE_31	NA	d__Bacteria;p__Verrucomicrobiota;c__Verrucomicrobiae;o__Pedosphaerales;f__UBA9464;g__CAIWAH01	iphop	c__Verrucomicrobiae	g__CAIWAH01	o__Pedosphaerales
2-56_NODE_314_fragment_1	NA	d__Bacteria;p__Actinobacteriota;c__Actinomycetia;o__Actinomycetales;f__Microbacteriaceae;g__Microbacterium	iphop	c__Actinomycetia	g__Microbacterium	o__Actinomycetales
2-56_NODE_3177	NA	d__Bacteria;p__Bacteroidota;c__Bacteroidia;o__Bacteroidales;f__Bacteroidaceae;g__Prevotella	iphop	c__Bacteroidia	g__Prevotella	o__Bacteroidales
2-56_NODE_339	NA	d__Bacteria;p__Proteobacteria;c__Gammaproteobacteria;o__Enterobacterales;f__Enterobacteriaceae;g__Citrobacter_C	iphop	c__Gammaproteobacteria	g__Citrobacter_C	o__Enterobacterales
2-56_NODE_3405	NA	d__Bacteria;p__Patescibacteria;c__Microgenomatia;o__UBA12405;f__UBA12405;g__UBA2283	iphop	c__Microgenomatia	g__UBA2283	o__UBA12405
2-56_NODE_3435	NA	d__Bacteria;p__Proteobacteria;c__Alphaproteobacteria;o__Sphingomonadales;f__Sphingomonadaceae;g__Sphingomonas	iphop	c__Alphaproteobacteria	g__Sphingomonas	o__Sphingomonadales
2-56_NODE_3655	NA	d__Bacteria;p__Firmicutes;c__Bacilli;o__Lactobacillales;f__Lactobacillaceae;g__Companilactobacillus	iphop	c__Bacilli	g__Companilactobacillus	o__Lactobacillales
2-56_NODE_370	NA	d__Bacteria;p__Chloroflexota;c__Anaerolineae;o__UBA2200;f__UBA2200;g__UBA2200	iphop	c__Anaerolineae	g__UBA2200	o__UBA2200
2-56_NODE_3727	NA	Unknown	iphop	Unknown	Unknown	Unknown
2-56_NODE_376	NA	d__Bacteria;p__Bacteroidota;c__Bacteroidia;o__Flavobacteriales;f__TMED113;g__GCA-2696965	iphop	c__Bacteroidia	g__GCA-2696965	o__Flavobacteriales
2-56_NODE_3800	NA	d__Bacteria;p__Proteobacteria;c__Gammaproteobacteria;o__Burkholderiales;f__Burkholderiaceae;g__Acidovorax	iphop	c__Gammaproteobacteria	g__Acidovorax	o__Burkholderiales
2-56_NODE_3849	NA	d__Bacteria;p__Proteobacteria;c__Gammaproteobacteria;o__SAR86;f__D2472;g__D2472	iphop	c__Gammaproteobacteria	g__D2472	o__SAR86
2-56_NODE_3890	NA	d__Bacteria;p__Proteobacteria;c__Gammaproteobacteria;o__Pseudomonadales;f__Pseudohongiellaceae;g__UBA5078	iphop	c__Gammaproteobacteria	g__UBA5078	o__Pseudomonadales
2-56_NODE_3964	NA	d__Bacteria;p__Proteobacteria;c__Gammaproteobacteria;o__Burkholderiales;f__Burkholderiaceae;g__Caballeronia	iphop	c__Gammaproteobacteria	g__Caballeronia	o__Burkholderiales
2-56_NODE_397	NA	d__Bacteria;p__Proteobacteria;c__Gammaproteobacteria;o__Burkholderiales;f__Burkholderiaceae;g__Variovorax	iphop	c__Gammaproteobacteria	g__Variovorax	o__Burkholderiales
2-56_NODE_4077	NA	d__Bacteria;p__Proteobacteria;c__Alphaproteobacteria;o__Caulobacterales;f__Caulobacteraceae;g__Phenylobacterium	iphop	c__Alphaproteobacteria	g__Phenylobacterium	o__Caulobacterales
2-56_NODE_4167	NA	d__Bacteria;p__Actinobacteriota;c__Actinomycetia;o__Propionibacteriales;f__Nocardioidaceae;g__Aeromicrobium	iphop	c__Actinomycetia	g__Aeromicrobium	o__Propionibacteriales
2-56_NODE_423_fragment_1	NA	d__Bacteria;p__Actinobacteriota;c__Actinomycetia;o__Actinomycetales;f__Microbacteriaceae;g__Curtobacterium	iphop	c__Actinomycetia	g__Curtobacterium	o__Actinomycetales
2-56_NODE_4322	NA	d__Bacteria;p__Actinobacteriota;c__Actinomycetia;o__Mycobacteriales;f__Mycobacteriaceae;g__Mycobacterium	iphop	c__Actinomycetia	g__Mycobacterium	o__Mycobacteriales
2-56_NODE_485	NA	d__Bacteria;p__Proteobacteria;c__Gammaproteobacteria;o__Legionellales;f__Legionellaceae;g__Tatlockia	iphop	c__Gammaproteobacteria	g__Tatlockia	o__Legionellales
2-56_NODE_489	NA	d__Bacteria;p__Proteobacteria;c__Alphaproteobacteria;o__Dongiales;f__Dongiaceae;g__VFKA01	iphop	c__Alphaproteobacteria	g__VFKA01	o__Dongiales
2-56_NODE_49_fragment_1	NA	d__Bacteria;p__Actinobacteriota;c__Actinomycetia;o__Streptosporangiales;f__Streptosporangiaceae;g__Spirillospora	iphop	c__Actinomycetia	g__Spirillospora	o__Streptosporangiales
2-56_NODE_521	NA	d__Bacteria;p__Proteobacteria;c__Gammaproteobacteria;o__Pseudomonadales;f__Pseudomonadaceae;g__Pseudomonas_E	iphop	c__Gammaproteobacteria	g__Pseudomonas_E	o__Pseudomonadales
2-56_NODE_564	NA	d__Bacteria;p__Proteobacteria;c__Gammaproteobacteria;o__Pseudomonadales;f__Pseudomonadaceae;g__Pseudomonas_E	iphop	c__Gammaproteobacteria	g__Pseudomonas_E	o__Pseudomonadales
2-56_NODE_630_fragment_1	NA	d__Bacteria;p__Actinobacteriota;c__Actinomycetia;o__Actinomycetales;f__Microbacteriaceae;g__Microbacterium	iphop	c__Actinomycetia	g__Microbacterium	o__Actinomycetales
2-56_NODE_731	NA	d__Bacteria;p__Proteobacteria;c__Gammaproteobacteria;o__Enterobacterales;f__Vibrionaceae;g__Vibrio	iphop	c__Gammaproteobacteria	g__Vibrio	o__Enterobacterales
2-56_NODE_763	NA	d__Bacteria;p__Actinobacteriota;c__Actinomycetia;o__Mycobacteriales;f__Mycobacteriaceae;g__Mycobacterium	iphop	c__Actinomycetia	g__Mycobacterium	o__Mycobacteriales
2-56_NODE_766	NA	d__Bacteria;p__Firmicutes;c__Bacilli;o__Lactobacillales;f__Streptococcaceae;g__Streptococcus	iphop	c__Bacilli	g__Streptococcus	o__Lactobacillales
2-56_NODE_773	NA	Unknown	iphop	Unknown	Unknown	Unknown
2-56_NODE_797	NA	d__Bacteria;p__Proteobacteria;c__Gammaproteobacteria;o__Enterobacterales;f__Enterobacteriaceae;g__Pectobacterium	iphop	c__Gammaproteobacteria	g__Pectobacterium	o__Enterobacterales
2-56_NODE_9092_1	NA	d__Bacteria;p__Actinobacteriota;c__Actinomycetia;o__Mycobacteriales;f__Mycobacteriaceae;g__Gordonia	iphop	c__Actinomycetia	g__Gordonia	o__Mycobacteriales
2-56_NODE_916_fragment_1	NA	d__Bacteria;p__Actinobacteriota;c__Actinomycetia;o__Actinomycetales;f__Microbacteriaceae;g__Microbacterium	iphop	c__Actinomycetia	g__Microbacterium	o__Actinomycetales
2-56_NODE_963	NA	d__Bacteria;p__Proteobacteria;c__Gammaproteobacteria;o__Pseudomonadales;f__Pseudomonadaceae;g__Pseudomonas_E	iphop	c__Gammaproteobacteria	g__Pseudomonas_E	o__Pseudomonadales
2-56_NODE_978	NA	d__Bacteria;p__Proteobacteria;c__Alphaproteobacteria;o__Rhizobiales;f__Beijerinckiaceae;g__Methylobacterium	iphop	c__Alphaproteobacteria	g__Methylobacterium	o__Rhizobiales
2-56_NODE_9863_1	NA	Unknown	iphop	Unknown	Unknown	Unknown
2-56_NODE_990	NA	d__Bacteria;p__Desulfobacterota;c__Desulfovibrionia;o__Desulfovibrionales;f__Desulfovibrionaceae;g__Humidesulfovibrio	iphop	c__Desulfovibrionia	g__Humidesulfovibrio	o__Desulfovibrionales
2-66_NODE_1216	NA	d__Bacteria;p__Proteobacteria;c__Gammaproteobacteria;o__Burkholderiales;f__Burkholderiaceae;g__Variovorax	iphop	c__Gammaproteobacteria	g__Variovorax	o__Burkholderiales
2-66_NODE_122	NA	d__Bacteria;p__Planctomycetota;c__Planctomycetes;o__Gemmatales;f__Gemmataceae;g__Zavarzinella	iphop	c__Planctomycetes	g__Zavarzinella	o__Gemmatales
2-66_NODE_1235	NA	Unknown	iphop	Unknown	Unknown	Unknown
2-66_NODE_1256	NA	d__Bacteria;p__Acidobacteriota;c__Acidobacteriae;o__Acidobacteriales;f__Acidobacteriaceae;g__Terracidiphilus	iphop	c__Acidobacteriae	g__Terracidiphilus	o__Acidobacteriales
2-66_NODE_1262	NA	d__Bacteria;p__Proteobacteria;c__Alphaproteobacteria;o__Sphingomonadales;f__Sphingomonadaceae;g__Erythrobacter_A	iphop	c__Alphaproteobacteria	g__Erythrobacter_A	o__Sphingomonadales
2-66_NODE_1317	NA	d__Bacteria;p__Proteobacteria;c__Alphaproteobacteria;o__Rhizobiales;f__Xanthobacteraceae;g__Bradyrhizobium	iphop	c__Alphaproteobacteria	g__Bradyrhizobium	o__Rhizobiales
2-66_NODE_1325	NA	d__Bacteria;p__Actinobacteriota;c__Actinomycetia;o__Mycobacteriales;f__Mycobacteriaceae;g__Mycobacterium	iphop	c__Actinomycetia	g__Mycobacterium	o__Mycobacteriales
2-66_NODE_180	NA	d__Bacteria;p__Proteobacteria;c__Alphaproteobacteria;o__Sphingomonadales;f__Sphingomonadaceae;g__Erythrobacter	iphop	c__Alphaproteobacteria	g__Erythrobacter	o__Sphingomonadales
2-66_NODE_186	NA	d__Bacteria;p__Actinobacteriota;c__Actinomycetia;o__Streptomycetales;f__Streptomycetaceae;g__Streptomyces	iphop	c__Actinomycetia	g__Streptomyces	o__Streptomycetales
2-66_NODE_1_fragment_19	NA	Unknown	iphop	Unknown	Unknown	Unknown
2-66_NODE_1_fragment_5	NA	Unknown	iphop	Unknown	Unknown	Unknown
2-66_NODE_206_fragment_1	NA	d__Bacteria;p__Proteobacteria;c__Alphaproteobacteria;o__Rhizobiales;f__Xanthobacteraceae;g__Bradyrhizobium	iphop	c__Alphaproteobacteria	g__Bradyrhizobium	o__Rhizobiales
2-66_NODE_211	NA	d__Bacteria;p__Proteobacteria;c__Alphaproteobacteria;o__Rhizobiales;f__Devosiaceae;g__Devosia	iphop	c__Alphaproteobacteria	g__Devosia	o__Rhizobiales
2-66_NODE_225	NA	d__Bacteria;p__Proteobacteria;c__Gammaproteobacteria;o__Enterobacterales;f__Enterobacteriaceae;g__Pectobacterium	iphop	c__Gammaproteobacteria	g__Pectobacterium	o__Enterobacterales
2-66_NODE_229	NA	d__Bacteria;p__Actinobacteriota;c__Actinomycetia;o__Mycobacteriales;f__Mycobacteriaceae;g__Mycobacterium	iphop	c__Actinomycetia	g__Mycobacterium	o__Mycobacteriales
2-66_NODE_243	NA	d__Bacteria;p__Proteobacteria;c__Gammaproteobacteria;o__Burkholderiales;f__Burkholderiaceae;g__Hydrogenophaga	iphop	c__Gammaproteobacteria	g__Hydrogenophaga	o__Burkholderiales
2-66_NODE_26_fragment_2	NA	d__Bacteria;p__Proteobacteria;c__Alphaproteobacteria;o__Rhizobiales;f__Xanthobacteraceae;g__Bradyrhizobium	iphop	c__Alphaproteobacteria	g__Bradyrhizobium	o__Rhizobiales
2-66_NODE_29_fragment_1	NA	d__Bacteria;p__Proteobacteria;c__Alphaproteobacteria;o__Rhizobiales;f__Xanthobacteraceae;g__Bradyrhizobium	iphop	c__Alphaproteobacteria	g__Bradyrhizobium	o__Rhizobiales
2-66_NODE_310	NA	d__Bacteria;p__Bacteroidota;c__Bacteroidia;o__Bacteroidales;f__Bacteroidaceae;g__Bacteroides	iphop	c__Bacteroidia	g__Bacteroides	o__Bacteroidales
2-66_NODE_35	NA	d__Bacteria;p__Actinobacteriota;c__Actinomycetia;o__Actinomycetales;f__Microbacteriaceae;g__Microbacterium	iphop	c__Actinomycetia	g__Microbacterium	o__Actinomycetales
2-66_NODE_360	NA	d__Bacteria;p__Proteobacteria;c__Gammaproteobacteria;o__Burkholderiales;f__Burkholderiaceae;g__Variovorax	iphop	c__Gammaproteobacteria	g__Variovorax	o__Burkholderiales
2-66_NODE_382	NA	d__Bacteria;p__Proteobacteria;c__Gammaproteobacteria;o__Enterobacterales;f__Enterobacteriaceae;g__Samsonia	iphop	c__Gammaproteobacteria	g__Samsonia	o__Enterobacterales
2-66_NODE_407	NA	d__Bacteria;p__Proteobacteria;c__Alphaproteobacteria;o__Rhizobiales;f__Beijerinckiaceae;g__Bosea	iphop	c__Alphaproteobacteria	g__Bosea	o__Rhizobiales
2-66_NODE_4632_1	NA	d__Bacteria;p__Proteobacteria;c__Alphaproteobacteria;o__Rhizobiales;f__Rhizobiaceae;g__Shinella	iphop	c__Alphaproteobacteria	g__Shinella	o__Rhizobiales
2-66_NODE_493	NA	d__Bacteria;p__Actinobacteriota;c__Actinomycetia;o__Mycobacteriales;f__Mycobacteriaceae;g__Mycobacterium	iphop	c__Actinomycetia	g__Mycobacterium	o__Mycobacteriales
2-66_NODE_510	NA	Unknown	iphop	Unknown	Unknown	Unknown
2-66_NODE_523	NA	Unknown	iphop	Unknown	Unknown	Unknown
2-66_NODE_539	NA	d__Bacteria;p__Actinobacteriota;c__Actinomycetia;o__Propionibacteriales;f__Nocardioidaceae;g__Nocardioides	iphop	c__Actinomycetia	g__Nocardioides	o__Propionibacteriales
2-66_NODE_56_fragment_1	NA	d__Bacteria;p__Proteobacteria;c__Alphaproteobacteria;o__Rhizobiales;f__Xanthobacteraceae;g__Bradyrhizobium	iphop	c__Alphaproteobacteria	g__Bradyrhizobium	o__Rhizobiales
2-66_NODE_588	NA	d__Bacteria;p__Proteobacteria;c__Alphaproteobacteria;o__Sphingomonadales;f__Sphingomonadaceae;g__Sphingopyxis	iphop	c__Alphaproteobacteria	g__Sphingopyxis	o__Sphingomonadales
2-66_NODE_66_fragment_1	NA	d__Bacteria;p__Proteobacteria;c__Alphaproteobacteria;o__Rhizobiales;f__Xanthobacteraceae;g__Bradyrhizobium	iphop	c__Alphaproteobacteria	g__Bradyrhizobium	o__Rhizobiales
2-66_NODE_684	NA	d__Bacteria;p__Proteobacteria;c__Gammaproteobacteria;o__Enterobacterales;f__Pasteurellaceae;g__Gallibacterium	iphop	c__Gammaproteobacteria	g__Gallibacterium	o__Enterobacterales
2-66_NODE_686	NA	d__Bacteria;p__Actinobacteriota;c__Actinomycetia;o__Mycobacteriales;f__Micromonosporaceae;g__Catellatospora	iphop	c__Actinomycetia	g__Catellatospora	o__Mycobacteriales
2-66_NODE_741	NA	d__Bacteria;p__Proteobacteria;c__Alphaproteobacteria;o__Rhizobiales;f__Beijerinckiaceae;g__Bosea	iphop	c__Alphaproteobacteria	g__Bosea	o__Rhizobiales
2-66_NODE_748	NA	d__Bacteria;p__Proteobacteria;c__Gammaproteobacteria;o__Enterobacterales;f__Enterobacteriaceae;g__Enterobacter	iphop	c__Gammaproteobacteria	g__Enterobacter	o__Enterobacterales
2-66_NODE_865	NA	d__Bacteria;p__Firmicutes;c__Bacilli;o__Lactobacillales;f__Streptococcaceae;g__Lactococcus	iphop	c__Bacilli	g__Lactococcus	o__Lactobacillales
2-66_NODE_89	NA	d__Bacteria;p__Cyanobacteria;c__Cyanobacteriia;o__Cyanobacteriales;f__Nostocaceae;g__Nostoc	iphop	c__Cyanobacteriia	g__Nostoc	o__Cyanobacteriales
2-66_NODE_92	NA	d__Bacteria;p__Proteobacteria;c__Alphaproteobacteria;o__Rhizobiales;f__Xanthobacteraceae;g__Bradyrhizobium	iphop	c__Alphaproteobacteria	g__Bradyrhizobium	o__Rhizobiales
2-66_NODE_920	NA	d__Bacteria;p__Bacteroidota;c__Bacteroidia;o__Flavobacteriales;f__Flavobacteriaceae;g__Flavobacterium	iphop	c__Bacteroidia	g__Flavobacterium	o__Flavobacteriales
2-66_NODE_951	NA	d__Bacteria;p__Actinobacteriota;c__Actinomycetia;o__Propionibacteriales;f__Nocardioidaceae;g__Nocardioides	iphop	c__Actinomycetia	g__Nocardioides	o__Propionibacteriales
2-66_NODE_972	NA	d__Bacteria;p__Proteobacteria;c__Gammaproteobacteria;o__Enterobacterales;f__Enterobacteriaceae;g__Dickeya	iphop	c__Gammaproteobacteria	g__Dickeya	o__Enterobacterales
3-26_NODE_102	NA	d__Bacteria;p__Actinobacteriota;c__Actinomycetia;o__Streptomycetales;f__Streptomycetaceae;g__Streptomyces	iphop	c__Actinomycetia	g__Streptomyces	o__Streptomycetales
3-26_NODE_1020	NA	d__Bacteria;p__Actinobacteriota;c__Actinomycetia;o__Streptomycetales;f__Streptomycetaceae;g__Streptomyces	iphop	c__Actinomycetia	g__Streptomyces	o__Streptomycetales
3-26_NODE_1068	NA	d__Bacteria;p__Bacteroidota;c__Bacteroidia;o__Flavobacteriales;f__Flavobacteriaceae;g__MED-G11	iphop	c__Bacteroidia	g__MED-G11	o__Flavobacteriales
3-26_NODE_1136	NA	d__Bacteria;p__Actinobacteriota;c__Actinomycetia;o__Streptomycetales;f__Streptomycetaceae;g__Streptomyces	iphop	c__Actinomycetia	g__Streptomyces	o__Streptomycetales
3-26_NODE_1179	NA	d__Bacteria;p__Proteobacteria;c__Gammaproteobacteria;o__Burkholderiales;f__Burkholderiaceae;g__Pandoraea	iphop	c__Gammaproteobacteria	g__Pandoraea	o__Burkholderiales
3-26_NODE_1185	NA	d__Bacteria;p__Bacteroidota;c__Bacteroidia;o__Bacteroidales;f__Bacteroidaceae;g__Bacteroides	iphop	c__Bacteroidia	g__Bacteroides	o__Bacteroidales
3-26_NODE_1204	NA	d__Bacteria;p__Proteobacteria;c__Gammaproteobacteria;o__Burkholderiales;f__Burkholderiaceae;g__PNNH01	iphop	c__Gammaproteobacteria	g__PNNH01	o__Burkholderiales
3-26_NODE_1287	NA	d__Bacteria;p__Proteobacteria;c__Gammaproteobacteria;o__Enterobacterales;f__Enterobacteriaceae;g__Serratia_F	iphop	c__Gammaproteobacteria	g__Serratia_F	o__Enterobacterales
3-26_NODE_1337	NA	d__Bacteria;p__Actinobacteriota;c__Actinomycetia;o__Mycobacteriales;f__Micromonosporaceae;g__Actinoplanes	iphop	c__Actinomycetia	g__Actinoplanes	o__Mycobacteriales
3-26_NODE_1361	NA	d__Bacteria;p__Actinobacteriota;c__Actinomycetia;o__Mycobacteriales;f__Micromonosporaceae;g__Actinoplanes	iphop	c__Actinomycetia	g__Actinoplanes	o__Mycobacteriales
3-26_NODE_1367	NA	d__Bacteria;p__Actinobacteriota;c__Actinomycetia;o__Streptomycetales;f__Streptomycetaceae;g__Streptomyces	iphop	c__Actinomycetia	g__Streptomyces	o__Streptomycetales
3-26_NODE_1401	NA	Unknown	iphop	Unknown	Unknown	Unknown
3-26_NODE_144	NA	d__Bacteria;p__Actinobacteriota;c__Actinomycetia;o__Mycobacteriales;f__Mycobacteriaceae;g__Nocardia	iphop	c__Actinomycetia	g__Nocardia	o__Mycobacteriales
3-26_NODE_1456	NA	d__Bacteria;p__Proteobacteria;c__Gammaproteobacteria;o__Xanthomonadales;f__Xanthomonadaceae;g__Arenimonas	iphop	c__Gammaproteobacteria	g__Arenimonas	o__Xanthomonadales
3-26_NODE_1480	NA	d__Bacteria;p__Acidobacteriota;c__Acidobacteriae;o__Bryobacterales;f__Bryobacteraceae;g__BOG-234	iphop	c__Acidobacteriae	g__BOG-234	o__Bryobacterales
3-26_NODE_151	NA	d__Bacteria;p__Proteobacteria;c__Alphaproteobacteria;o__Micropepsales;f__Micropepsaceae;g__Rhizomicrobium	iphop	c__Alphaproteobacteria	g__Rhizomicrobium	o__Micropepsales
3-26_NODE_1535	NA	d__Bacteria;p__Proteobacteria;c__Alphaproteobacteria;o__Rhizobiales;f__Xanthobacteraceae;g__Bradyrhizobium	iphop	c__Alphaproteobacteria	g__Bradyrhizobium	o__Rhizobiales
3-26_NODE_162	NA	d__Bacteria;p__Bacteroidota;c__Bacteroidia;o__Bacteroidales;f__Bacteroidaceae;g__Bacteroides	iphop	c__Bacteroidia	g__Bacteroides	o__Bacteroidales
3-26_NODE_1644	NA	d__Bacteria;p__Actinobacteriota;c__Acidimicrobiia;o__Acidimicrobiales;f__Ilumatobacteraceae;g__UBA2093	iphop	c__Acidimicrobiia	g__UBA2093	o__Acidimicrobiales
3-26_NODE_167	NA	d__Bacteria;p__Bacteroidota;c__Bacteroidia;o__Bacteroidales;f__Bacteroidaceae;g__Bacteroides	iphop	c__Bacteroidia	g__Bacteroides	o__Bacteroidales
3-26_NODE_1672	NA	d__Bacteria;p__Actinobacteriota;c__Actinomycetia;o__Streptomycetales;f__Streptomycetaceae;g__Streptomyces	iphop	c__Actinomycetia	g__Streptomyces	o__Streptomycetales
3-26_NODE_1795	NA	d__Bacteria;p__Acidobacteriota;c__Acidobacteriae;o__Bryobacterales;f__Bryobacteraceae;g__BOG-234	iphop	c__Acidobacteriae	g__BOG-234	o__Bryobacterales
3-26_NODE_180	NA	d__Bacteria;p__Actinobacteriota;c__Actinomycetia;o__Mycobacteriales;f__Mycobacteriaceae;g__Mycobacterium	iphop	c__Actinomycetia	g__Mycobacterium	o__Mycobacteriales
3-26_NODE_1806	NA	d__Bacteria;p__Actinobacteriota;c__Actinomycetia;o__Streptomycetales;f__Streptomycetaceae;g__Streptomyces	iphop	c__Actinomycetia	g__Streptomyces	o__Streptomycetales
3-26_NODE_1828	NA	d__Bacteria;p__Proteobacteria;c__Gammaproteobacteria;o__Enterobacterales;f__Enterobacteriaceae;g__Kosakonia	iphop	c__Gammaproteobacteria	g__Kosakonia	o__Enterobacterales
3-26_NODE_19	NA	d__Bacteria;p__Actinobacteriota;c__Acidimicrobiia;o__Acidimicrobiales;f__Ilumatobacteraceae;g__UBA2093	iphop	c__Acidimicrobiia	g__UBA2093	o__Acidimicrobiales
3-26_NODE_1903	NA	d__Bacteria;p__Actinobacteriota;c__Actinomycetia;o__Actinomycetales;f__Dermatophilaceae;g__Phycicoccus	iphop	c__Actinomycetia	g__Phycicoccus	o__Actinomycetales
3-26_NODE_1950	NA	d__Bacteria;p__Proteobacteria;c__Gammaproteobacteria;o__Burkholderiales;f__Burkholderiaceae;g__Comamonas	iphop	c__Gammaproteobacteria	g__Comamonas	o__Burkholderiales
3-26_NODE_1_fragment_4	NA	Unknown	iphop	Unknown	Unknown	Unknown
3-26_NODE_2	NA	d__Bacteria;p__Cyanobacteria;c__Cyanobacteriia;o__PCC-6307;f__Cyanobiaceae;g__Prochlorococcus_A	iphop	c__Cyanobacteriia	g__Prochlorococcus_A	o__PCC-6307
3-26_NODE_2002	NA	d__Bacteria;p__Proteobacteria;c__Gammaproteobacteria;o__Burkholderiales;f__Burkholderiaceae;g__Comamonas	iphop	c__Gammaproteobacteria	g__Comamonas	o__Burkholderiales
3-26_NODE_2018	NA	d__Bacteria;p__Proteobacteria;c__Alphaproteobacteria;o__Rhizobiales;f__Rhizobiaceae;g__Rhizobium	iphop	c__Alphaproteobacteria	g__Rhizobium	o__Rhizobiales
3-26_NODE_2054	NA	d__Bacteria;p__Actinobacteriota;c__Actinomycetia;o__Streptomycetales;f__Streptomycetaceae;g__Streptomyces	iphop	c__Actinomycetia	g__Streptomyces	o__Streptomycetales
3-26_NODE_2056	NA	d__Bacteria;p__Actinobacteriota;c__Actinomycetia;o__Streptomycetales;f__Streptomycetaceae;g__Streptomyces	iphop	c__Actinomycetia	g__Streptomyces	o__Streptomycetales
3-26_NODE_215	NA	d__Bacteria;p__Proteobacteria;c__Gammaproteobacteria;o__Burkholderiales;f__Burkholderiaceae;g__Duganella	iphop	c__Gammaproteobacteria	g__Duganella	o__Burkholderiales
3-26_NODE_30	NA	d__Bacteria;p__Actinobacteriota;c__Actinomycetia;o__Streptomycetales;f__Streptomycetaceae;g__Streptomyces	iphop	c__Actinomycetia	g__Streptomyces	o__Streptomycetales
3-26_NODE_300	NA	d__Bacteria;p__Proteobacteria;c__Alphaproteobacteria;o__Rhizobiales;f__Rhizobiaceae;g__Sinorhizobium	iphop	c__Alphaproteobacteria	g__Sinorhizobium	o__Rhizobiales
3-26_NODE_309	NA	d__Bacteria;p__Proteobacteria;c__Alphaproteobacteria;o__Rhizobiales;f__Xanthobacteraceae;g__Bradyrhizobium	iphop	c__Alphaproteobacteria	g__Bradyrhizobium	o__Rhizobiales
3-26_NODE_313	NA	d__Bacteria;p__Proteobacteria;c__Gammaproteobacteria;o__Burkholderiales;f__Burkholderiaceae;g__WNDY01	iphop	c__Gammaproteobacteria	g__WNDY01	o__Burkholderiales
3-26_NODE_318	NA	d__Bacteria;p__Actinobacteriota;c__Acidimicrobiia;o__Acidimicrobiales;f__JACDCH01;g__JACDCH01	iphop	c__Acidimicrobiia	g__JACDCH01	o__Acidimicrobiales
3-26_NODE_3339_1	NA	d__Bacteria;p__Proteobacteria;c__Gammaproteobacteria;o__Burkholderiales;f__Burkholderiaceae;g__Comamonas	iphop	c__Gammaproteobacteria	g__Comamonas	o__Burkholderiales
3-26_NODE_35	NA	Unknown	iphop	Unknown	Unknown	Unknown
3-26_NODE_359	NA	d__Bacteria;p__Proteobacteria;c__Alphaproteobacteria;o__Rhizobiales;f__Rhizobiaceae;g__Mesorhizobium	iphop	c__Alphaproteobacteria	g__Mesorhizobium	o__Rhizobiales
3-26_NODE_394	NA	d__Bacteria;p__Proteobacteria;c__Alphaproteobacteria;o__Rhizobiales;f__Rhizobiaceae;g__Mesorhizobium	iphop	c__Alphaproteobacteria	g__Mesorhizobium	o__Rhizobiales
3-26_NODE_430	NA	d__Bacteria;p__Proteobacteria;c__Gammaproteobacteria;o__Burkholderiales;f__Burkholderiaceae;g__Variovorax	iphop	c__Gammaproteobacteria	g__Variovorax	o__Burkholderiales
3-26_NODE_449	NA	d__Bacteria;p__Proteobacteria;c__Gammaproteobacteria;o__Burkholderiales;f__SG8-39;g__SCGC-AG-212-J23	iphop	c__Gammaproteobacteria	g__SCGC-AG-212-J23	o__Burkholderiales
3-26_NODE_460	NA	d__Bacteria;p__Proteobacteria;c__Gammaproteobacteria;o__Burkholderiales;f__Burkholderiaceae;g__Xylophilus	iphop	c__Gammaproteobacteria	g__Xylophilus	o__Burkholderiales
3-26_NODE_5	NA	d__Archaea;p__Methanobacteriota;c__Methanobacteria;o__Methanobacteriales;f__Methanobacteriaceae;g__Methanobacterium_B	iphop	c__Methanobacteria	g__Methanobacterium_B	o__Methanobacteriales
3-26_NODE_540	NA	d__Bacteria;p__Actinobacteriota;c__Actinomycetia;o__Streptomycetales;f__Streptomycetaceae;g__Streptomyces	iphop	c__Actinomycetia	g__Streptomyces	o__Streptomycetales
3-26_NODE_550	NA	d__Bacteria;p__Bacteroidota;c__Bacteroidia;o__Bacteroidales;f__P3;g__UBA1711	iphop	c__Bacteroidia	g__UBA1711	o__Bacteroidales
3-26_NODE_59	NA	d__Bacteria;p__Actinobacteriota;c__Actinomycetia;o__Mycobacteriales;f__Pseudonocardiaceae;g__Lentzea	iphop	c__Actinomycetia	g__Lentzea	o__Mycobacteriales
3-26_NODE_613	NA	d__Bacteria;p__Proteobacteria;c__Gammaproteobacteria;o__Burkholderiales;f__Burkholderiaceae;g__Massilia	iphop	c__Gammaproteobacteria	g__Massilia	o__Burkholderiales
3-26_NODE_65	NA	d__Bacteria;p__Bacteroidota;c__Bacteroidia;o__Bacteroidales;f__Bacteroidaceae;g__Prevotella	iphop	c__Bacteroidia	g__Prevotella	o__Bacteroidales
3-26_NODE_657	NA	d__Bacteria;p__Actinobacteriota;c__Actinomycetia;o__Mycobacteriales;f__Micromonosporaceae;g__Actinoplanes	iphop	c__Actinomycetia	g__Actinoplanes	o__Mycobacteriales
3-26_NODE_691	NA	d__Bacteria;p__Actinobacteriota;c__Actinomycetia;o__Streptomycetales;f__Streptomycetaceae;g__Streptomyces	iphop	c__Actinomycetia	g__Streptomyces	o__Streptomycetales
3-26_NODE_711	NA	d__Bacteria;p__Bacteroidota;c__Bacteroidia;o__Bacteroidales;f__Bacteroidaceae;g__Bacteroides	iphop	c__Bacteroidia	g__Bacteroides	o__Bacteroidales
3-26_NODE_714	NA	d__Bacteria;p__Actinobacteriota;c__Actinomycetia;o__Mycobacteriales;f__Mycobacteriaceae;g__Mycobacterium	iphop	c__Actinomycetia	g__Mycobacterium	o__Mycobacteriales
3-26_NODE_758	NA	d__Bacteria;p__Proteobacteria;c__Alphaproteobacteria;o__Rhizobiales;f__Rhizobiaceae;g__Pseudaminobacter	iphop	c__Alphaproteobacteria	g__Pseudaminobacter	o__Rhizobiales
3-26_NODE_771	NA	d__Bacteria;p__Proteobacteria;c__Alphaproteobacteria;o__Rhizobiales;f__Rhizobiaceae;g__Mesorhizobium	iphop	c__Alphaproteobacteria	g__Mesorhizobium	o__Rhizobiales
3-26_NODE_782	NA	d__Bacteria;p__Proteobacteria;c__Alphaproteobacteria;o__Rhizobiales;f__Xanthobacteraceae;g__Bradyrhizobium	iphop	c__Alphaproteobacteria	g__Bradyrhizobium	o__Rhizobiales
3-26_NODE_792	NA	d__Bacteria;p__Actinobacteriota;c__Actinomycetia;o__Mycobacteriales;f__Mycobacteriaceae;g__Mycobacterium	iphop	c__Actinomycetia	g__Mycobacterium	o__Mycobacteriales
3-26_NODE_807	NA	d__Bacteria;p__Actinobacteriota;c__Actinomycetia;o__Streptomycetales;f__Streptomycetaceae;g__Streptomyces	iphop	c__Actinomycetia	g__Streptomyces	o__Streptomycetales
3-26_NODE_811	NA	d__Bacteria;p__Proteobacteria;c__Gammaproteobacteria;o__Burkholderiales;f__Burkholderiaceae;g__Variovorax	iphop	c__Gammaproteobacteria	g__Variovorax	o__Burkholderiales
3-26_NODE_818	NA	d__Bacteria;p__Proteobacteria;c__Alphaproteobacteria;o__Rhizobiales;f__Rhizobiaceae;g__Ensifer	iphop	c__Alphaproteobacteria	g__Ensifer	o__Rhizobiales
3-26_NODE_83	NA	d__Bacteria;p__Actinobacteriota;c__Actinomycetia;o__Mycobacteriales;f__Mycobacteriaceae;g__Nocardia	iphop	c__Actinomycetia	g__Nocardia	o__Mycobacteriales
3-26_NODE_866	NA	d__Bacteria;p__Proteobacteria;c__Gammaproteobacteria;o__Burkholderiales;f__Burkholderiaceae;g__Variovorax	iphop	c__Gammaproteobacteria	g__Variovorax	o__Burkholderiales
3-26_NODE_931	NA	d__Bacteria;p__Bacteroidota;c__Bacteroidia;o__Bacteroidales;f__Bacteroidaceae;g__Prevotella	iphop	c__Bacteroidia	g__Prevotella	o__Bacteroidales
3-26_NODE_936	NA	d__Bacteria;p__Actinobacteriota;c__Actinomycetia;o__Streptomycetales;f__Streptomycetaceae;g__Streptomyces	iphop	c__Actinomycetia	g__Streptomyces	o__Streptomycetales
3-26_NODE_950	NA	d__Bacteria;p__Proteobacteria;c__Gammaproteobacteria;o__Pseudomonadales;f__Pseudomonadaceae;g__Pseudomonas_E	iphop	c__Gammaproteobacteria	g__Pseudomonas_E	o__Pseudomonadales
3-26_NODE_961	NA	d__Bacteria;p__Proteobacteria;c__Gammaproteobacteria;o__Burkholderiales;f__Burkholderiaceae;g__Variovorax	iphop	c__Gammaproteobacteria	g__Variovorax	o__Burkholderiales
3-26_NODE_98	NA	d__Bacteria;p__Actinobacteriota;c__Actinomycetia;o__Streptomycetales;f__Streptomycetaceae;g__Streptomyces	iphop	c__Actinomycetia	g__Streptomyces	o__Streptomycetales
3-26_NODE_992	NA	d__Bacteria;p__Proteobacteria;c__Gammaproteobacteria;o__Pseudomonadales;f__Pseudomonadaceae;g__Pseudomonas_E	iphop	c__Gammaproteobacteria	g__Pseudomonas_E	o__Pseudomonadales
3-26_NODE_996	NA	d__Bacteria;p__Proteobacteria;c__Alphaproteobacteria;o__Sphingomonadales;f__Sphingomonadaceae;g__Sphingopyxis	iphop	c__Alphaproteobacteria	g__Sphingopyxis	o__Sphingomonadales
3-4_NODE_1002	NA	d__Bacteria;p__Proteobacteria;c__Gammaproteobacteria;o__Pseudomonadales;f__Pseudomonadaceae;g__Pseudomonas_E	iphop	c__Gammaproteobacteria	g__Pseudomonas_E	o__Pseudomonadales
3-4_NODE_104	NA	d__Bacteria;p__Actinobacteriota;c__Actinomycetia;o__Streptomycetales;f__Streptomycetaceae;g__Streptomyces_B	iphop	c__Actinomycetia	g__Streptomyces_B	o__Streptomycetales
3-4_NODE_1051	NA	d__Bacteria;p__Proteobacteria;c__Gammaproteobacteria;o__Burkholderiales;f__Burkholderiaceae;g__Rhizobacter	iphop	c__Gammaproteobacteria	g__Rhizobacter	o__Burkholderiales
3-4_NODE_1092	NA	d__Bacteria;p__Proteobacteria;c__Gammaproteobacteria;o__Enterobacterales;f__Vibrionaceae;g__Vibrio	iphop	c__Gammaproteobacteria	g__Vibrio	o__Enterobacterales
3-4_NODE_110	NA	d__Bacteria;p__Bacteroidota;c__Bacteroidia;o__Bacteroidales;f__Bacteroidaceae;g__Bacteroides	iphop	c__Bacteroidia	g__Bacteroides	o__Bacteroidales
3-4_NODE_1170_1	NA	d__Bacteria;p__Proteobacteria;c__Gammaproteobacteria;o__Enterobacterales;f__Enterobacteriaceae;g__Brenneria	iphop	c__Gammaproteobacteria	g__Brenneria	o__Enterobacterales
3-4_NODE_118	NA	d__Bacteria;p__Actinobacteriota;c__Actinomycetia;o__Streptomycetales;f__Streptomycetaceae;g__Streptomyces	iphop	c__Actinomycetia	g__Streptomyces	o__Streptomycetales
3-4_NODE_1204	NA	d__Bacteria;p__Proteobacteria;c__Gammaproteobacteria;o__Pseudomonadales;f__Pseudomonadaceae;g__Pseudomonas_E	iphop	c__Gammaproteobacteria	g__Pseudomonas_E	o__Pseudomonadales
3-4_NODE_1262	NA	d__Bacteria;p__Firmicutes;c__Bacilli;o__Lactobacillales;f__Lactobacillaceae;g__Oenococcus	iphop	c__Bacilli	g__Oenococcus	o__Lactobacillales
3-4_NODE_1264	NA	d__Bacteria;p__Proteobacteria;c__Alphaproteobacteria;o__Rhizobiales;f__Rhizobiaceae;g__Mesorhizobium	iphop	c__Alphaproteobacteria	g__Mesorhizobium	o__Rhizobiales
3-4_NODE_1337	NA	d__Bacteria;p__Proteobacteria;c__Alphaproteobacteria;o__Rhizobiales;f__Rhizobiaceae;g__Mesorhizobium	iphop	c__Alphaproteobacteria	g__Mesorhizobium	o__Rhizobiales
3-4_NODE_1343	NA	d__Bacteria;p__Chloroflexota;c__Dehalococcoidia;o__UBA2979;f__UBA2979;g__SURF-43	iphop	c__Dehalococcoidia	g__SURF-43	o__UBA2979
3-4_NODE_1354_1	NA	d__Bacteria;p__Proteobacteria;c__Alphaproteobacteria;o__Rhizobiales;f__Rhizobiaceae;g__Mesorhizobium	iphop	c__Alphaproteobacteria	g__Mesorhizobium	o__Rhizobiales
3-4_NODE_1355	NA	Unknown	iphop	Unknown	Unknown	Unknown
3-4_NODE_1363	NA	d__Bacteria;p__Actinobacteriota;c__Actinomycetia;o__Streptomycetales;f__Streptomycetaceae;g__Streptomyces	iphop	c__Actinomycetia	g__Streptomyces	o__Streptomycetales
3-4_NODE_1373	NA	d__Bacteria;p__Actinobacteriota;c__Actinomycetia;o__Mycobacteriales;f__Micromonosporaceae;g__Actinoplanes	iphop	c__Actinomycetia	g__Actinoplanes	o__Mycobacteriales
3-4_NODE_1533	NA	Unknown	iphop	Unknown	Unknown	Unknown
3-4_NODE_1543	NA	d__Bacteria;p__Bacteroidota;c__Bacteroidia;o__Bacteroidales;f__UBA932;g__RC9	iphop	c__Bacteroidia	g__RC9	o__Bacteroidales
3-4_NODE_1611	NA	d__Bacteria;p__Proteobacteria;c__Alphaproteobacteria;o__Rhizobiales;f__Rhizobiaceae;g__Rhizobium	iphop	c__Alphaproteobacteria	g__Rhizobium	o__Rhizobiales
3-4_NODE_1631	NA	d__Bacteria;p__Firmicutes;c__Bacilli;o__Lactobacillales;f__Lactobacillaceae;g__Oenococcus	iphop	c__Bacilli	g__Oenococcus	o__Lactobacillales
3-4_NODE_1691	NA	d__Bacteria;p__Proteobacteria;c__Gammaproteobacteria;o__Burkholderiales;f__Burkholderiaceae;g__Variovorax	iphop	c__Gammaproteobacteria	g__Variovorax	o__Burkholderiales
3-4_NODE_1776	NA	d__Bacteria;p__Proteobacteria;c__Alphaproteobacteria;o__Rhizobiales;f__Rhizobiaceae;g__Mesorhizobium	iphop	c__Alphaproteobacteria	g__Mesorhizobium	o__Rhizobiales
3-4_NODE_1783	NA	Unknown	iphop	Unknown	Unknown	Unknown
3-4_NODE_181	NA	d__Bacteria;p__Actinobacteriota;c__Actinomycetia;o__Streptomycetales;f__Streptomycetaceae;g__Streptomyces	iphop	c__Actinomycetia	g__Streptomyces	o__Streptomycetales
3-4_NODE_1842	NA	d__Bacteria;p__Proteobacteria;c__Alphaproteobacteria;o__Rhizobiales;f__Rhizobiaceae;g__Mesorhizobium	iphop	c__Alphaproteobacteria	g__Mesorhizobium	o__Rhizobiales
3-4_NODE_1843	NA	d__Bacteria;p__Proteobacteria;c__Gammaproteobacteria;o__Pseudomonadales;f__Moraxellaceae;g__Acinetobacter	iphop	c__Gammaproteobacteria	g__Acinetobacter	o__Pseudomonadales
3-4_NODE_1897	NA	d__Bacteria;p__Proteobacteria;c__Alphaproteobacteria;o__Caulobacterales;f__Caulobacteraceae;g__Brevundimonas	iphop	c__Alphaproteobacteria	g__Brevundimonas	o__Caulobacterales
3-4_NODE_1898	NA	d__Bacteria;p__Proteobacteria;c__Alphaproteobacteria;o__Bin65;f__Bin65;g__SBBV01	iphop	c__Alphaproteobacteria	g__SBBV01	o__Bin65
3-4_NODE_1900	NA	d__Bacteria;p__Proteobacteria;c__Alphaproteobacteria;o__Rhizobiales;f__Rhizobiaceae;g__Mesorhizobium	iphop	c__Alphaproteobacteria	g__Mesorhizobium	o__Rhizobiales
3-4_NODE_1917	NA	d__Bacteria;p__Proteobacteria;c__Gammaproteobacteria;o__Burkholderiales;f__SG8-39;g__SCGC-AG-212-J23	iphop	c__Gammaproteobacteria	g__SCGC-AG-212-J23	o__Burkholderiales
3-4_NODE_192	NA	d__Bacteria;p__Proteobacteria;c__Gammaproteobacteria;o__Burkholderiales;f__Burkholderiaceae;g__CAIKVZ01	iphop	c__Gammaproteobacteria	g__CAIKVZ01	o__Burkholderiales
3-4_NODE_1949	NA	d__Bacteria;p__Actinobacteriota;c__Actinomycetia;o__Streptomycetales;f__Streptomycetaceae;g__Streptomyces	iphop	c__Actinomycetia	g__Streptomyces	o__Streptomycetales
3-4_NODE_1953	NA	d__Bacteria;p__Proteobacteria;c__Alphaproteobacteria;o__Rhizobiales;f__Rhizobiaceae;g__Mesorhizobium	iphop	c__Alphaproteobacteria	g__Mesorhizobium	o__Rhizobiales
3-4_NODE_2074	NA	d__Bacteria;p__Proteobacteria;c__Gammaproteobacteria;o__Enterobacterales;f__Enterobacteriaceae;g__Serratia	iphop	c__Gammaproteobacteria	g__Serratia	o__Enterobacterales
3-4_NODE_2124	NA	d__Bacteria;p__Actinobacteriota;c__Coriobacteriia;o__Coriobacteriales;f__Coriobacteriaceae;g__Collinsella	iphop	c__Coriobacteriia	g__Collinsella	o__Coriobacteriales
3-4_NODE_215	NA	d__Bacteria;p__Actinobacteriota;c__Actinomycetia;o__Streptomycetales;f__Streptomycetaceae;g__Streptomyces	iphop	c__Actinomycetia	g__Streptomyces	o__Streptomycetales
3-4_NODE_2154	NA	d__Bacteria;p__Verrucomicrobiota;c__Verrucomicrobiae;o__Opitutales;f__Opitutaceae;g__ER46	iphop	c__Verrucomicrobiae	g__ER46	o__Opitutales
3-4_NODE_2174	NA	d__Bacteria;p__Cyanobacteria;c__Cyanobacteriia;o__PCC-6307;f__Cyanobiaceae;g__AG-363-J23	iphop	c__Cyanobacteriia	g__AG-363-J23	o__PCC-6307
3-4_NODE_2279	NA	d__Bacteria;p__Actinobacteriota;c__Actinomycetia;o__Actinomycetales;f__Microbacteriaceae;g__Rhodoglobus	iphop	c__Actinomycetia	g__Rhodoglobus	o__Actinomycetales
3-4_NODE_228	NA	d__Bacteria;p__Bacteroidota;c__Bacteroidia;o__Flavobacteriales;f__Flavobacteriaceae;g__Flavobacterium	iphop	c__Bacteroidia	g__Flavobacterium	o__Flavobacteriales
3-4_NODE_23	NA	d__Bacteria;p__Bacteroidota;c__Bacteroidia;o__Flavobacteriales;f__UBA10066;g__GCA-002727735	iphop	c__Bacteroidia	g__GCA-002727735	o__Flavobacteriales
3-4_NODE_2315	NA	d__Bacteria;p__Actinobacteriota;c__Actinomycetia;o__Streptomycetales;f__Catenulisporaceae;g__Catenulispora	iphop	c__Actinomycetia	g__Catenulispora	o__Streptomycetales
3-4_NODE_2323	NA	d__Bacteria;p__Bacteroidota;c__Bacteroidia;o__Flavobacteriales;f__Flavobacteriaceae;g__Flavobacterium	iphop	c__Bacteroidia	g__Flavobacterium	o__Flavobacteriales
3-4_NODE_2426	NA	d__Bacteria;p__Actinobacteriota;c__Actinomycetia;o__Streptomycetales;f__Streptomycetaceae;g__Streptomyces	iphop	c__Actinomycetia	g__Streptomyces	o__Streptomycetales
3-4_NODE_2488	NA	Unknown	iphop	Unknown	Unknown	Unknown
3-4_NODE_2548	NA	d__Bacteria;p__Chloroflexota;c__Ellin6529;o__CSP1-4;f__CSP1-4;g__CAIXZV01	iphop	c__Ellin6529	g__CAIXZV01	o__CSP1-4
3-4_NODE_2551	NA	d__Bacteria;p__Actinobacteriota;c__Actinomycetia;o__Streptomycetales;f__Streptomycetaceae;g__Streptomyces	iphop	c__Actinomycetia	g__Streptomyces	o__Streptomycetales
3-4_NODE_2654	NA	d__Bacteria;p__Proteobacteria;c__Alphaproteobacteria;o__Rhizobiales;f__Rhizobiaceae;g__Mesorhizobium	iphop	c__Alphaproteobacteria	g__Mesorhizobium	o__Rhizobiales
3-4_NODE_2694	NA	d__Bacteria;p__Chloroflexota;c__Ellin6529;o__CSP1-4;f__CSP1-4;g__CF-46	iphop	c__Ellin6529	g__CF-46	o__CSP1-4
3-4_NODE_2704	NA	d__Bacteria;p__Firmicutes;c__Bacilli;o__Lactobacillales;f__Lactobacillaceae;g__Weissella	iphop	c__Bacilli	g__Weissella	o__Lactobacillales
3-4_NODE_2759	NA	d__Bacteria;p__Patescibacteria;c__Paceibacteria;o__UBA9983_A;f__UBA9973;g__UBA8515	iphop	c__Paceibacteria	g__UBA8515	o__UBA9983_A
3-4_NODE_277	NA	d__Bacteria;p__Proteobacteria;c__Alphaproteobacteria;o__Sphingomonadales;f__Sphingomonadaceae;g__Croceibacterium	iphop	c__Alphaproteobacteria	g__Croceibacterium	o__Sphingomonadales
3-4_NODE_2825	NA	d__Bacteria;p__Proteobacteria;c__Alphaproteobacteria;o__Rhizobiales;f__Rhizobiaceae;g__Pararhizobium	iphop	c__Alphaproteobacteria	g__Pararhizobium	o__Rhizobiales
3-4_NODE_2836	NA	d__Bacteria;p__Actinobacteriota;c__Actinomycetia;o__Streptomycetales;f__Streptomycetaceae;g__Streptomyces	iphop	c__Actinomycetia	g__Streptomyces	o__Streptomycetales
3-4_NODE_2837	NA	d__Bacteria;p__Proteobacteria;c__Gammaproteobacteria;o__Burkholderiales;f__Burkholderiaceae;g__Variovorax	iphop	c__Gammaproteobacteria	g__Variovorax	o__Burkholderiales
3-4_NODE_2904	NA	d__Bacteria;p__Chloroflexota;c__Anaerolineae;o__Anaerolineales;f__EnvOPS12;g__UBA12294	iphop	c__Anaerolineae	g__UBA12294	o__Anaerolineales
3-4_NODE_3041	NA	d__Bacteria;p__Actinobacteriota;c__Actinomycetia;o__Mycobacteriales;f__Pseudonocardiaceae;g__Saccharomonospora	iphop	c__Actinomycetia	g__Saccharomonospora	o__Mycobacteriales
3-4_NODE_3171	NA	d__Bacteria;p__Proteobacteria;c__Gammaproteobacteria;o__Enterobacterales;f__Enterobacteriaceae;g__Yersinia	iphop	c__Gammaproteobacteria	g__Yersinia	o__Enterobacterales
3-4_NODE_329	NA	d__Bacteria;p__Acidobacteriota;c__Acidobacteriae;o__Bryobacterales;f__Bryobacteraceae;g__BOG-234	iphop	c__Acidobacteriae	g__BOG-234	o__Bryobacterales
3-4_NODE_33	NA	d__Bacteria;p__Proteobacteria;c__Alphaproteobacteria;o__Rhizobiales;f__Rhizobiaceae;g__Mesorhizobium	iphop	c__Alphaproteobacteria	g__Mesorhizobium	o__Rhizobiales
3-4_NODE_373	NA	d__Bacteria;p__Proteobacteria;c__Alphaproteobacteria;o__Rhizobiales;f__Beijerinckiaceae;g__Bosea	iphop	c__Alphaproteobacteria	g__Bosea	o__Rhizobiales
3-4_NODE_395	NA	d__Bacteria;p__Proteobacteria;c__Alphaproteobacteria;o__Rhizobiales;f__Rhizobiaceae;g__Rhizobium	iphop	c__Alphaproteobacteria	g__Rhizobium	o__Rhizobiales
3-4_NODE_397	NA	d__Bacteria;p__Actinobacteriota;c__Actinomycetia;o__Streptomycetales;f__Streptomycetaceae;g__Streptomyces	iphop	c__Actinomycetia	g__Streptomyces	o__Streptomycetales
3-4_NODE_398	NA	d__Bacteria;p__Actinobacteriota;c__Actinomycetia;o__Propionibacteriales;f__Nocardioidaceae;g__Nocardioides	iphop	c__Actinomycetia	g__Nocardioides	o__Propionibacteriales
3-4_NODE_400	NA	d__Bacteria;p__Proteobacteria;c__Gammaproteobacteria;o__Burkholderiales;f__Burkholderiaceae;g__Variovorax	iphop	c__Gammaproteobacteria	g__Variovorax	o__Burkholderiales
3-4_NODE_400	NA	Unknown	iphop	Unknown	Unknown	Unknown
3-4_NODE_41	NA	d__Bacteria;p__Proteobacteria;c__Alphaproteobacteria;o__Rhizobiales;f__Xanthobacteraceae;g__Pseudolabrys	iphop	c__Alphaproteobacteria	g__Pseudolabrys	o__Rhizobiales
3-4_NODE_430	NA	d__Bacteria;p__Proteobacteria;c__Gammaproteobacteria;o__Burkholderiales;f__Burkholderiaceae;g__Variovorax	iphop	c__Gammaproteobacteria	g__Variovorax	o__Burkholderiales
3-4_NODE_450	NA	d__Bacteria;p__Proteobacteria;c__Gammaproteobacteria;o__Burkholderiales;f__Burkholderiaceae;g__Variovorax	iphop	c__Gammaproteobacteria	g__Variovorax	o__Burkholderiales
3-4_NODE_470	NA	d__Bacteria;p__Bacteroidota;c__Bacteroidia;o__Bacteroidales;f__Bacteroidaceae;g__Bacteroides	iphop	c__Bacteroidia	g__Bacteroides	o__Bacteroidales
3-4_NODE_49	NA	d__Bacteria;p__Actinobacteriota;c__Actinomycetia;o__Mycobacteriales;f__Micromonosporaceae;g__Catellatospora	iphop	c__Actinomycetia	g__Catellatospora	o__Mycobacteriales
3-4_NODE_532	NA	d__Bacteria;p__Bacteroidota;c__Bacteroidia;o__Flavobacteriales;f__Flavobacteriaceae;g__Flavobacterium	iphop	c__Bacteroidia	g__Flavobacterium	o__Flavobacteriales
3-4_NODE_536	NA	d__Bacteria;p__Bacteroidota;c__Bacteroidia;o__Bacteroidales;f__Bacteroidaceae;g__Bacteroides	iphop	c__Bacteroidia	g__Bacteroides	o__Bacteroidales
3-4_NODE_551	NA	d__Bacteria;p__Proteobacteria;c__Alphaproteobacteria;o__Rhodobacterales;f__Rhodobacteraceae;g__Rubellimicrobium	iphop	c__Alphaproteobacteria	g__Rubellimicrobium	o__Rhodobacterales
3-4_NODE_609	NA	d__Bacteria;p__Proteobacteria;c__Gammaproteobacteria;o__Enterobacterales;f__Enterobacteriaceae;g__Pectobacterium	iphop	c__Gammaproteobacteria	g__Pectobacterium	o__Enterobacterales
3-4_NODE_61	NA	d__Bacteria;p__Bacteroidota;c__Bacteroidia;o__Bacteroidales;f__Bacteroidaceae;g__Prevotella	iphop	c__Bacteroidia	g__Prevotella	o__Bacteroidales
3-4_NODE_696	NA	d__Bacteria;p__Proteobacteria;c__Alphaproteobacteria;o__Rhizobiales;f__Xanthobacteraceae;g__Bradyrhizobium	iphop	c__Alphaproteobacteria	g__Bradyrhizobium	o__Rhizobiales
3-4_NODE_710	NA	d__Bacteria;p__Firmicutes_A;c__Clostridia;o__Peptostreptococcales;f__Peptostreptococcaceae;g__Clostridioides	iphop	c__Clostridia	g__Clostridioides	o__Peptostreptococcales
3-4_NODE_722	NA	d__Bacteria;p__Proteobacteria;c__Alphaproteobacteria;o__Sphingomonadales;f__Sphingomonadaceae;g__Altericroceibacterium	iphop	c__Alphaproteobacteria	g__Altericroceibacterium	o__Sphingomonadales
3-4_NODE_730	NA	d__Bacteria;p__Proteobacteria;c__Gammaproteobacteria;o__Burkholderiales;f__CADEHE01;g__CADEHE01	iphop	c__Gammaproteobacteria	g__CADEHE01	o__Burkholderiales
3-4_NODE_740	NA	d__Bacteria;p__Actinobacteriota;c__Actinomycetia;o__Mycobacteriales;f__Mycobacteriaceae;g__Mycobacterium	iphop	c__Actinomycetia	g__Mycobacterium	o__Mycobacteriales
3-4_NODE_754	NA	d__Bacteria;p__Proteobacteria;c__Gammaproteobacteria;o__Burkholderiales;f__Burkholderiaceae;g__Hylemonella	iphop	c__Gammaproteobacteria	g__Hylemonella	o__Burkholderiales
3-4_NODE_755	NA	d__Bacteria;p__Actinobacteriota;c__Actinomycetia;o__Actinomycetales;f__Dermatophilaceae;g__Phycicoccus	iphop	c__Actinomycetia	g__Phycicoccus	o__Actinomycetales
3-4_NODE_7667_1	NA	d__Bacteria;p__Proteobacteria;c__Alphaproteobacteria;o__Rhodobacterales;f__Rhodobacteraceae;g__Tropicimonas	iphop	c__Alphaproteobacteria	g__Tropicimonas	o__Rhodobacterales
3-4_NODE_821	NA	d__Bacteria;p__Actinobacteriota;c__Actinomycetia;o__Mycobacteriales;f__Mycobacteriaceae;g__Mycobacterium	iphop	c__Actinomycetia	g__Mycobacterium	o__Mycobacteriales
3-4_NODE_822	NA	Unknown	iphop	Unknown	Unknown	Unknown
3-4_NODE_850	NA	d__Bacteria;p__Proteobacteria;c__Gammaproteobacteria;o__Pseudomonadales;f__Pseudomonadaceae;g__Pseudomonas_E	iphop	c__Gammaproteobacteria	g__Pseudomonas_E	o__Pseudomonadales
3-4_NODE_862	NA	d__Bacteria;p__Proteobacteria;c__Alphaproteobacteria;o__Sphingomonadales;f__Sphingomonadaceae;g__Alteraurantiacibacter	iphop	c__Alphaproteobacteria	g__Alteraurantiacibacter	o__Sphingomonadales
3-4_NODE_869_1	NA	d__Bacteria;p__Proteobacteria;c__Alphaproteobacteria;o__Sphingomonadales;f__Sphingomonadaceae;g__Erythrobacter	iphop	c__Alphaproteobacteria	g__Erythrobacter	o__Sphingomonadales
3-4_NODE_9	NA	Unknown	iphop	Unknown	Unknown	Unknown
3-4_NODE_924	NA	d__Bacteria;p__Proteobacteria;c__Gammaproteobacteria;o__Pseudomonadales;f__Pseudomonadaceae;g__Pseudomonas_A	iphop	c__Gammaproteobacteria	g__Pseudomonas_A	o__Pseudomonadales
3-4_NODE_971	NA	d__Bacteria;p__Proteobacteria;c__Gammaproteobacteria;o__Burkholderiales;f__Burkholderiaceae;g__Variovorax	iphop	c__Gammaproteobacteria	g__Variovorax	o__Burkholderiales
3-4_NODE_973	NA	d__Bacteria;p__Proteobacteria;c__Alphaproteobacteria;o__Rhizobiales;f__Rhizobiaceae;g__Sinorhizobium	iphop	c__Alphaproteobacteria	g__Sinorhizobium	o__Rhizobiales
3-4_NODE_992	NA	d__Bacteria;p__Proteobacteria;c__Gammaproteobacteria;o__Burkholderiales;f__Burkholderiaceae;g__Variovorax	iphop	c__Gammaproteobacteria	g__Variovorax	o__Burkholderiales
3-4_NODE_992	NA	Unknown	iphop	Unknown	Unknown	Unknown
3-5_NODE_1057	NA	d__Bacteria;p__Proteobacteria;c__Gammaproteobacteria;o__Steroidobacterales;f__Steroidobacteraceae;g__ZC4RG24	iphop	c__Gammaproteobacteria	g__ZC4RG24	o__Steroidobacterales
3-5_NODE_1077	NA	d__Bacteria;p__Actinobacteriota;c__Actinomycetia;o__Propionibacteriales;f__Nocardioidaceae;g__Nocardioides	iphop	c__Actinomycetia	g__Nocardioides	o__Propionibacteriales
3-5_NODE_1149	NA	d__Bacteria;p__Actinobacteriota;c__Actinomycetia;o__Streptomycetales;f__Streptomycetaceae;g__Streptomyces	iphop	c__Actinomycetia	g__Streptomyces	o__Streptomycetales
3-5_NODE_116	NA	d__Bacteria;p__Firmicutes_C;c__Negativicutes;o__Acidaminococcales;f__Acidaminococcaceae;g__RZYP01	iphop	c__Negativicutes	g__RZYP01	o__Acidaminococcales
3-5_NODE_1179	NA	d__Bacteria;p__Actinobacteriota;c__Actinomycetia;o__Mycobacteriales;f__Micromonosporaceae;g__Catellatospora	iphop	c__Actinomycetia	g__Catellatospora	o__Mycobacteriales
3-5_NODE_1258	NA	d__Bacteria;p__Actinobacteriota;c__Actinomycetia;o__Mycobacteriales;f__Mycobacteriaceae;g__Mycobacterium	iphop	c__Actinomycetia	g__Mycobacterium	o__Mycobacteriales
3-5_NODE_132	NA	d__Bacteria;p__Bacteroidota;c__Bacteroidia;o__Bacteroidales;f__Bacteroidaceae;g__Prevotella	iphop	c__Bacteroidia	g__Prevotella	o__Bacteroidales
3-5_NODE_1339	NA	Unknown	iphop	Unknown	Unknown	Unknown
3-5_NODE_1348	NA	d__Bacteria;p__Actinobacteriota;c__Actinomycetia;o__Mycobacteriales;f__Mycobacteriaceae;g__Mycobacterium	iphop	c__Actinomycetia	g__Mycobacterium	o__Mycobacteriales
3-5_NODE_147_fragment_1	NA	d__Bacteria;p__Proteobacteria;c__Alphaproteobacteria;o__Rhizobiales;f__Beijerinckiaceae;g__Methylobacterium	iphop	c__Alphaproteobacteria	g__Methylobacterium	o__Rhizobiales
3-5_NODE_1480	NA	d__Bacteria;p__Proteobacteria;c__Gammaproteobacteria;o__Pseudomonadales;f__Pseudomonadaceae;g__Pseudomonas_E	iphop	c__Gammaproteobacteria	g__Pseudomonas_E	o__Pseudomonadales
3-5_NODE_1499	NA	d__Bacteria;p__Proteobacteria;c__Alphaproteobacteria;o__Rhizobiales;f__Rhizobiaceae;g__Rhizobium	iphop	c__Alphaproteobacteria	g__Rhizobium	o__Rhizobiales
3-5_NODE_1503	NA	d__Bacteria;p__Proteobacteria;c__Gammaproteobacteria;o__Burkholderiales;f__Burkholderiaceae;g__Variovorax	iphop	c__Gammaproteobacteria	g__Variovorax	o__Burkholderiales
3-5_NODE_1550	NA	d__Bacteria;p__Actinobacteriota;c__Actinomycetia;o__Mycobacteriales;f__Mycobacteriaceae;g__Mycobacterium	iphop	c__Actinomycetia	g__Mycobacterium	o__Mycobacteriales
3-5_NODE_1559	NA	d__Bacteria;p__Proteobacteria;c__Gammaproteobacteria;o__Pseudomonadales;f__Pseudomonadaceae;g__Pseudomonas_E	iphop	c__Gammaproteobacteria	g__Pseudomonas_E	o__Pseudomonadales
3-5_NODE_1657	NA	d__Bacteria;p__Proteobacteria;c__Gammaproteobacteria;o__Enterobacterales;f__Enterobacteriaceae;g__Citrobacter	iphop	c__Gammaproteobacteria	g__Citrobacter	o__Enterobacterales
3-5_NODE_1658	NA	d__Bacteria;p__Actinobacteriota;c__Actinomycetia;o__Mycobacteriales;f__Mycobacteriaceae;g__Mycobacterium	iphop	c__Actinomycetia	g__Mycobacterium	o__Mycobacteriales
3-5_NODE_1739_1	NA	d__Bacteria;p__Proteobacteria;c__Gammaproteobacteria;o__Burkholderiales;f__Neisseriaceae;g__Neisseria	iphop	c__Gammaproteobacteria	g__Neisseria	o__Burkholderiales
3-5_NODE_1897	NA	d__Bacteria;p__Bacteroidota;c__Bacteroidia;o__Flavobacteriales;f__Flavobacteriaceae;g__Flavobacterium	iphop	c__Bacteroidia	g__Flavobacterium	o__Flavobacteriales
3-5_NODE_1933	NA	d__Bacteria;p__Actinobacteriota;c__Actinomycetia;o__Mycobacteriales;f__Micromonosporaceae;g__Actinoplanes	iphop	c__Actinomycetia	g__Actinoplanes	o__Mycobacteriales
3-5_NODE_1953	NA	d__Bacteria;p__Proteobacteria;c__Gammaproteobacteria;o__Pseudomonadales;f__Pseudomonadaceae;g__Pseudomonas_E	iphop	c__Gammaproteobacteria	g__Pseudomonas_E	o__Pseudomonadales
3-5_NODE_1984	NA	d__Bacteria;p__Proteobacteria;c__Gammaproteobacteria;o__Pseudomonadales;f__Pseudomonadaceae;g__Pseudomonas_A	iphop	c__Gammaproteobacteria	g__Pseudomonas_A	o__Pseudomonadales
3-5_NODE_2037	NA	d__Bacteria;p__Proteobacteria;c__Alphaproteobacteria;o__Rhizobiales;f__Beijerinckiaceae;g__Methylobacterium	iphop	c__Alphaproteobacteria	g__Methylobacterium	o__Rhizobiales
3-5_NODE_2040	NA	d__Bacteria;p__Proteobacteria;c__Gammaproteobacteria;o__Burkholderiales;f__Burkholderiaceae;g__Paraburkholderia	iphop	c__Gammaproteobacteria	g__Paraburkholderia	o__Burkholderiales
3-5_NODE_2148	NA	d__Bacteria;p__Proteobacteria;c__Gammaproteobacteria;o__SAR86;f__D2472;g__SAR86A	iphop	c__Gammaproteobacteria	g__SAR86A	o__SAR86
3-5_NODE_2237	NA	d__Bacteria;p__Proteobacteria;c__Gammaproteobacteria;o__Enterobacterales;f__Alteromonadaceae;g__Alteromonas	iphop	c__Gammaproteobacteria	g__Alteromonas	o__Enterobacterales
3-5_NODE_2237	NA	d__Bacteria;p__Proteobacteria;c__Gammaproteobacteria;o__Pseudomonadales;f__Cellvibrionaceae;g__Cellvibrio	iphop	c__Gammaproteobacteria	g__Cellvibrio	o__Pseudomonadales
3-5_NODE_2248_fragment_1	NA	d__Bacteria;p__Proteobacteria;c__Alphaproteobacteria;o__Rhizobiales;f__Beijerinckiaceae;g__Methylobacterium	iphop	c__Alphaproteobacteria	g__Methylobacterium	o__Rhizobiales
3-5_NODE_2324	NA	d__Bacteria;p__Proteobacteria;c__Gammaproteobacteria;o__Burkholderiales;f__Burkholderiaceae;g__ALPHA2B	iphop	c__Gammaproteobacteria	g__ALPHA2B	o__Burkholderiales
3-5_NODE_234	NA	d__Bacteria;p__Actinobacteriota;c__Actinomycetia;o__Mycobacteriales;f__Mycobacteriaceae;g__Corynebacterium	iphop	c__Actinomycetia	g__Corynebacterium	o__Mycobacteriales
3-5_NODE_2412	NA	d__Bacteria;p__Actinobacteriota;c__Actinomycetia;o__Mycobacteriales;f__Pseudonocardiaceae;g__Saccharomonospora	iphop	c__Actinomycetia	g__Saccharomonospora	o__Mycobacteriales
3-5_NODE_2671	NA	d__Bacteria;p__Actinobacteriota;c__Actinomycetia;o__Streptomycetales;f__Streptomycetaceae;g__Streptomyces_B	iphop	c__Actinomycetia	g__Streptomyces_B	o__Streptomycetales
3-5_NODE_2708	NA	d__Bacteria;p__Actinobacteriota;c__Actinomycetia;o__Mycobacteriales;f__Mycobacteriaceae;g__Mycobacterium	iphop	c__Actinomycetia	g__Mycobacterium	o__Mycobacteriales
3-5_NODE_2728	NA	d__Bacteria;p__Proteobacteria;c__Alphaproteobacteria;o__Sphingomonadales;f__Sphingomonadaceae;g__Sphingomonas	iphop	c__Alphaproteobacteria	g__Sphingomonas	o__Sphingomonadales
3-5_NODE_28	NA	Unknown	iphop	Unknown	Unknown	Unknown
3-5_NODE_2819	NA	d__Bacteria;p__Actinobacteriota;c__Actinomycetia;o__Mycobacteriales;f__Mycobacteriaceae;g__Mycobacterium	iphop	c__Actinomycetia	g__Mycobacterium	o__Mycobacteriales
3-5_NODE_2894	NA	d__Bacteria;p__Proteobacteria;c__Gammaproteobacteria;o__Enterobacterales;f__Enterobacteriaceae;g__Pectobacterium	iphop	c__Gammaproteobacteria	g__Pectobacterium	o__Enterobacterales
3-5_NODE_2897	NA	d__Bacteria;p__Actinobacteriota;c__Coriobacteriia;o__Coriobacteriales;f__Coriobacteriaceae;g__Collinsella	iphop	c__Coriobacteriia	g__Collinsella	o__Coriobacteriales
3-5_NODE_293	NA	Unknown	iphop	Unknown	Unknown	Unknown
3-5_NODE_2985	NA	d__Bacteria;p__Proteobacteria;c__Gammaproteobacteria;o__Pseudomonadales;f__Moraxellaceae;g__Acinetobacter	iphop	c__Gammaproteobacteria	g__Acinetobacter	o__Pseudomonadales
3-5_NODE_3024	NA	d__Bacteria;p__Actinobacteriota;c__Actinomycetia;o__Actinomycetales;f__Microbacteriaceae;g__Microbacterium	iphop	c__Actinomycetia	g__Microbacterium	o__Actinomycetales
3-5_NODE_3061	NA	d__Bacteria;p__Proteobacteria;c__Gammaproteobacteria;o__Enterobacterales;f__Enterobacteriaceae;g__Pectobacterium	iphop	c__Gammaproteobacteria	g__Pectobacterium	o__Enterobacterales
3-5_NODE_3104	NA	d__Bacteria;p__Actinobacteriota;c__Actinomycetia;o__Mycobacteriales;f__Pseudonocardiaceae;g__Umezawaea	iphop	c__Actinomycetia	g__Umezawaea	o__Mycobacteriales
3-5_NODE_3124	NA	d__Bacteria;p__Proteobacteria;c__Gammaproteobacteria;o__Enterobacterales;f__Enterobacteriaceae;g__Pectobacterium	iphop	c__Gammaproteobacteria	g__Pectobacterium	o__Enterobacterales
3-5_NODE_3143	NA	d__Bacteria;p__Bacteroidota;c__Bacteroidia;o__Flavobacteriales;f__BACL11;g__GCA-2711125	iphop	c__Bacteroidia	g__GCA-2711125	o__Flavobacteriales
3-5_NODE_3151	NA	d__Bacteria;p__Bacteroidota;c__Bacteroidia;o__Bacteroidales;f__Bacteroidaceae;g__Bacteroides	iphop	c__Bacteroidia	g__Bacteroides	o__Bacteroidales
3-5_NODE_3235	NA	d__Bacteria;p__Proteobacteria;c__Gammaproteobacteria;o__Enterobacterales;f__Enterobacteriaceae;g__Brenneria	iphop	c__Gammaproteobacteria	g__Brenneria	o__Enterobacterales
3-5_NODE_3346	NA	d__Bacteria;p__Actinobacteriota;c__Actinomycetia;o__Mycobacteriales;f__Mycobacteriaceae;g__Mycobacterium	iphop	c__Actinomycetia	g__Mycobacterium	o__Mycobacteriales
3-5_NODE_3349	NA	d__Bacteria;p__Proteobacteria;c__Gammaproteobacteria;o__Pseudomonadales;f__Pseudomonadaceae;g__Pseudomonas_E	iphop	c__Gammaproteobacteria	g__Pseudomonas_E	o__Pseudomonadales
3-5_NODE_360	NA	d__Bacteria;p__Chloroflexota;c__Anaerolineae;o__Anaerolineales;f__EnvOPS12;g__OLB14	iphop	c__Anaerolineae	g__OLB14	o__Anaerolineales
3-5_NODE_363	NA	d__Bacteria;p__Proteobacteria;c__Alphaproteobacteria;o__Caulobacterales;f__Parvularculaceae;g__CV81	iphop	c__Alphaproteobacteria	g__CV81	o__Caulobacterales
3-5_NODE_383	NA	d__Bacteria;p__Acidobacteriota;c__Acidobacteriae;o__Bryobacterales;f__Bryobacteraceae;g__BOG-234	iphop	c__Acidobacteriae	g__BOG-234	o__Bryobacterales
3-5_NODE_385	NA	d__Bacteria;p__Proteobacteria;c__Alphaproteobacteria;o__Reyranellales;f__Reyranellaceae;g__Reyranella	iphop	c__Alphaproteobacteria	g__Reyranella	o__Reyranellales
3-5_NODE_43	NA	d__Bacteria;p__Cyanobacteria;c__Cyanobacteriia;o__PCC-6307;f__Cyanobiaceae;g__Prochlorococcus_B	iphop	c__Cyanobacteriia	g__Prochlorococcus_B	o__PCC-6307
3-5_NODE_446	NA	d__Bacteria;p__Proteobacteria;c__Gammaproteobacteria;o__Burkholderiales;f__Burkholderiaceae;g__Burkholderia	iphop	c__Gammaproteobacteria	g__Burkholderia	o__Burkholderiales
3-5_NODE_4705_1	NA	d__Bacteria;p__Proteobacteria;c__Gammaproteobacteria;o__Burkholderiales;f__Burkholderiaceae;g__Ralstonia	iphop	c__Gammaproteobacteria	g__Ralstonia	o__Burkholderiales
3-5_NODE_51	NA	d__Bacteria;p__Bacteroidota;c__Bacteroidia;o__Flavobacteriales;f__UBA10066;g__MED-G20	iphop	c__Bacteroidia	g__MED-G20	o__Flavobacteriales
3-5_NODE_608	NA	d__Bacteria;p__Proteobacteria;c__Gammaproteobacteria;o__Pseudomonadales;f__Pseudomonadaceae;g__Pseudomonas_E	iphop	c__Gammaproteobacteria	g__Pseudomonas_E	o__Pseudomonadales
3-5_NODE_631	NA	d__Bacteria;p__Proteobacteria;c__Gammaproteobacteria;o__Pseudomonadales;f__Pseudomonadaceae;g__Pseudomonas_E	iphop	c__Gammaproteobacteria	g__Pseudomonas_E	o__Pseudomonadales
3-5_NODE_670	NA	d__Bacteria;p__Bacteroidota;c__Bacteroidia;o__Flavobacteriales;f__Flavobacteriaceae;g__Flavobacterium	iphop	c__Bacteroidia	g__Flavobacterium	o__Flavobacteriales
3-5_NODE_672	NA	d__Bacteria;p__Proteobacteria;c__Gammaproteobacteria;o__Burkholderiales;f__Burkholderiaceae;g__Rhodoferax_B	iphop	c__Gammaproteobacteria	g__Rhodoferax_B	o__Burkholderiales
3-5_NODE_681	NA	d__Bacteria;p__Proteobacteria;c__Gammaproteobacteria;o__Burkholderiales;f__Burkholderiaceae;g__Bordetella_C	iphop	c__Gammaproteobacteria	g__Bordetella_C	o__Burkholderiales
3-5_NODE_683	NA	d__Bacteria;p__Actinobacteriota;c__Actinomycetia;o__Mycobacteriales;f__Mycobacteriaceae;g__Mycobacterium	iphop	c__Actinomycetia	g__Mycobacterium	o__Mycobacteriales
3-5_NODE_69	NA	d__Bacteria;p__Proteobacteria;c__Alphaproteobacteria;o__Rhizobiales;f__Rhizobiaceae;g__Mesorhizobium	iphop	c__Alphaproteobacteria	g__Mesorhizobium	o__Rhizobiales
3-5_NODE_695	NA	d__Bacteria;p__Proteobacteria;c__Alphaproteobacteria;o__Sphingomonadales;f__Sphingomonadaceae;g__Sphingomicrobium	iphop	c__Alphaproteobacteria	g__Sphingomicrobium	o__Sphingomonadales
3-5_NODE_753_2	NA	d__Bacteria;p__Proteobacteria;c__Alphaproteobacteria;o__Sphingomonadales;f__Sphingomonadaceae;g__Novosphingobium	iphop	c__Alphaproteobacteria	g__Novosphingobium	o__Sphingomonadales
3-5_NODE_814	NA	d__Bacteria;p__Proteobacteria;c__Gammaproteobacteria;o__Pseudomonadales;f__Pseudomonadaceae;g__Pseudomonas_E	iphop	c__Gammaproteobacteria	g__Pseudomonas_E	o__Pseudomonadales
3-5_NODE_826	NA	d__Bacteria;p__Verrucomicrobiota;c__Verrucomicrobiae;o__Verrucomicrobiales;f__Akkermansiaceae;g__UBA1315	iphop	c__Verrucomicrobiae	g__UBA1315	o__Verrucomicrobiales
3-5_NODE_878	NA	d__Bacteria;p__Proteobacteria;c__Gammaproteobacteria;o__Burkholderiales;f__SG8-39;g__SCGC-AG-212-J23	iphop	c__Gammaproteobacteria	g__SCGC-AG-212-J23	o__Burkholderiales
3-5_NODE_921	NA	d__Bacteria;p__Proteobacteria;c__Gammaproteobacteria;o__SAR86;f__D2472;g__D2472	iphop	c__Gammaproteobacteria	g__D2472	o__SAR86
3-5_NODE_926	NA	d__Bacteria;p__Actinobacteriota;c__Actinomycetia;o__Propionibacteriales;f__Nocardioidaceae;g__Nocardioides	iphop	c__Actinomycetia	g__Nocardioides	o__Propionibacteriales
3-5_NODE_938	NA	d__Bacteria;p__Proteobacteria;c__Alphaproteobacteria;o__Caulobacterales;f__Caulobacteraceae;g__Brevundimonas	iphop	c__Alphaproteobacteria	g__Brevundimonas	o__Caulobacterales
3-5_NODE_971	NA	d__Bacteria;p__Proteobacteria;c__Gammaproteobacteria;o__Pseudomonadales;f__Pseudomonadaceae;g__Pseudomonas_E	iphop	c__Gammaproteobacteria	g__Pseudomonas_E	o__Pseudomonadales
4-2_NODE_1015	NA	d__Bacteria;p__Proteobacteria;c__Gammaproteobacteria;o__Enterobacterales;f__Enterobacteriaceae;g__Yersinia	iphop	c__Gammaproteobacteria	g__Yersinia	o__Enterobacterales
4-2_NODE_1018	NA	d__Bacteria;p__Chloroflexota;c__Anaerolineae;o__4572-78;f__J111;g__DSQQ01	iphop	c__Anaerolineae	g__DSQQ01	o__4572-78
4-2_NODE_1035	NA	d__Bacteria;p__Proteobacteria;c__Alphaproteobacteria;o__Micropepsales;f__Micropepsaceae;g__Rhizomicrobium	iphop	c__Alphaproteobacteria	g__Rhizomicrobium	o__Micropepsales
4-2_NODE_1051	NA	d__Bacteria;p__Proteobacteria;c__Alphaproteobacteria;o__Sphingomonadales;f__Sphingomonadaceae;g__Sphingomonas	iphop	c__Alphaproteobacteria	g__Sphingomonas	o__Sphingomonadales
4-2_NODE_10515_1	NA	d__Bacteria;p__Proteobacteria;c__Alphaproteobacteria;o__Rhizobiales;f__Rhizobiaceae;g__Sinorhizobium	iphop	c__Alphaproteobacteria	g__Sinorhizobium	o__Rhizobiales
4-2_NODE_1104	NA	d__Bacteria;p__Proteobacteria;c__Alphaproteobacteria;o__Rhizobiales;f__Xanthobacteraceae;g__Bradyrhizobium	iphop	c__Alphaproteobacteria	g__Bradyrhizobium	o__Rhizobiales
4-2_NODE_1107	NA	d__Bacteria;p__Proteobacteria;c__Alphaproteobacteria;o__Rhizobiales;f__Beijerinckiaceae;g__Methylobacterium	iphop	c__Alphaproteobacteria	g__Methylobacterium	o__Rhizobiales
4-2_NODE_1110	NA	d__Bacteria;p__Proteobacteria;c__Alphaproteobacteria;o__Reyranellales;f__Reyranellaceae;g__Reyranella	iphop	c__Alphaproteobacteria	g__Reyranella	o__Reyranellales
4-2_NODE_1119	NA	d__Bacteria;p__Proteobacteria;c__Alphaproteobacteria;o__Rhizobiales;f__Xanthobacteraceae;g__Bradyrhizobium	iphop	c__Alphaproteobacteria	g__Bradyrhizobium	o__Rhizobiales
4-2_NODE_1147	NA	d__Bacteria;p__Patescibacteria;c__Paceibacteria;o__UBA9983_A;f__CAIZLB01;g__CAIJKW01	iphop	c__Paceibacteria	g__CAIJKW01	o__UBA9983_A
4-2_NODE_1170	NA	d__Bacteria;p__Proteobacteria;c__Gammaproteobacteria;o__Legionellales;f__Legionellaceae;g__Legionella	iphop	c__Gammaproteobacteria	g__Legionella	o__Legionellales
4-2_NODE_1307	NA	d__Bacteria;p__Proteobacteria;c__Gammaproteobacteria;o__Enterobacterales;f__Vibrionaceae;g__Vibrio	iphop	c__Gammaproteobacteria	g__Vibrio	o__Enterobacterales
4-2_NODE_133_fragment_1	NA	d__Bacteria;p__Proteobacteria;c__Gammaproteobacteria;o__Burkholderiales;f__Burkholderiaceae;g__Pandoraea	iphop	c__Gammaproteobacteria	g__Pandoraea	o__Burkholderiales
4-2_NODE_1413	NA	d__Bacteria;p__Proteobacteria;c__Gammaproteobacteria;o__Burkholderiales;f__Burkholderiaceae;g__Ralstonia	iphop	c__Gammaproteobacteria	g__Ralstonia	o__Burkholderiales
4-2_NODE_143	NA	d__Bacteria;p__Bacteroidota;c__Bacteroidia;o__Bacteroidales;f__Bacteroidaceae;g__Bacteroides	iphop	c__Bacteroidia	g__Bacteroides	o__Bacteroidales
4-2_NODE_1437	NA	d__Bacteria;p__Proteobacteria;c__Alphaproteobacteria;o__Reyranellales;f__Reyranellaceae;g__Reyranella	iphop	c__Alphaproteobacteria	g__Reyranella	o__Reyranellales
4-2_NODE_1539	NA	d__Bacteria;p__Dependentiae;c__Babeliae;o__Babeliales;f__Babeliaceae;g__BOG-1370	iphop	c__Babeliae	g__BOG-1370	o__Babeliales
4-2_NODE_155	NA	d__Bacteria;p__Bacteroidota;c__Bacteroidia;o__Chitinophagales;f__Chitinophagaceae;g__Puia	iphop	c__Bacteroidia	g__Puia	o__Chitinophagales
4-2_NODE_15_fragment_2	NA	d__Bacteria;p__Proteobacteria;c__Alphaproteobacteria;o__Rhizobiales;f__Beijerinckiaceae;g__Methylobacterium	iphop	c__Alphaproteobacteria	g__Methylobacterium	o__Rhizobiales
4-2_NODE_1606	NA	d__Bacteria;p__Cyanobacteria;c__Cyanobacteriia;o__PCC-6307;f__Cyanobiaceae;g__Prochlorococcus_A	iphop	c__Cyanobacteriia	g__Prochlorococcus_A	o__PCC-6307
4-2_NODE_1609	NA	d__Bacteria;p__Proteobacteria;c__Gammaproteobacteria;o__Burkholderiales;f__Burkholderiaceae;g__Paraburkholderia	iphop	c__Gammaproteobacteria	g__Paraburkholderia	o__Burkholderiales
4-2_NODE_1668	NA	d__Bacteria;p__Acidobacteriota;c__Acidobacteriae;o__Acidobacteriales;f__Koribacteraceae;g__QIAJ01	iphop	c__Acidobacteriae	g__QIAJ01	o__Acidobacteriales
4-2_NODE_17	NA	Unknown	iphop	Unknown	Unknown	Unknown
4-2_NODE_1713	NA	d__Bacteria;p__Bacteroidota;c__Bacteroidia;o__Bacteroidales;f__Dysgonomonadaceae;g__Dysgonomonas	iphop	c__Bacteroidia	g__Dysgonomonas	o__Bacteroidales
4-2_NODE_1723	NA	d__Archaea;p__Halobacteriota;c__Methanosarcinia;o__Methanosarcinales;f__Methanosarcinaceae;g__Methanosarcina	iphop	c__Methanosarcinia	g__Methanosarcina	o__Methanosarcinales
4-2_NODE_1740	NA	d__Bacteria;p__Proteobacteria;c__Gammaproteobacteria;o__Xanthomonadales;f__Xanthomonadaceae;g__Arenimonas	iphop	c__Gammaproteobacteria	g__Arenimonas	o__Xanthomonadales
4-2_NODE_1800	NA	d__Bacteria;p__Proteobacteria;c__Alphaproteobacteria;o__Rhizobiales;f__Rhizobiaceae;g__Rhizobium	iphop	c__Alphaproteobacteria	g__Rhizobium	o__Rhizobiales
4-2_NODE_1830	NA	d__Bacteria;p__Proteobacteria;c__Gammaproteobacteria;o__Legionellales;f__Legionellaceae;g__Legionella	iphop	c__Gammaproteobacteria	g__Legionella	o__Legionellales
4-2_NODE_186	NA	d__Bacteria;p__Bacteroidota;c__Bacteroidia;o__Bacteroidales;f__Bacteroidaceae;g__Bacteroides	iphop	c__Bacteroidia	g__Bacteroides	o__Bacteroidales
4-2_NODE_1893	NA	d__Bacteria;p__Proteobacteria;c__Gammaproteobacteria;o__Legionellales;f__Legionellaceae;g__Tatlockia	iphop	c__Gammaproteobacteria	g__Tatlockia	o__Legionellales
4-2_NODE_1934	NA	d__Bacteria;p__Proteobacteria;c__Gammaproteobacteria;o__Legionellales;f__Legionellaceae;g__Legionella	iphop	c__Gammaproteobacteria	g__Legionella	o__Legionellales
4-2_NODE_195	NA	d__Bacteria;p__Firmicutes;c__Bacilli;o__Lactobacillales;f__Streptococcaceae;g__Streptococcus	iphop	c__Bacilli	g__Streptococcus	o__Lactobacillales
4-2_NODE_1996	NA	d__Bacteria;p__Proteobacteria;c__Gammaproteobacteria;o__Enterobacterales;f__Enterobacteriaceae;g__Yersinia	iphop	c__Gammaproteobacteria	g__Yersinia	o__Enterobacterales
4-2_NODE_2014	NA	d__Bacteria;p__Proteobacteria;c__Gammaproteobacteria;o__Enterobacterales;f__Vibrionaceae;g__Vibrio	iphop	c__Gammaproteobacteria	g__Vibrio	o__Enterobacterales
4-2_NODE_2015	NA	d__Bacteria;p__Proteobacteria;c__Gammaproteobacteria;o__Enterobacterales;f__Enterobacteriaceae;g__Yersinia	iphop	c__Gammaproteobacteria	g__Yersinia	o__Enterobacterales
4-2_NODE_2049	NA	d__Bacteria;p__Proteobacteria;c__Gammaproteobacteria;o__Enterobacterales;f__Enterobacteriaceae;g__Photorhabdus	iphop	c__Gammaproteobacteria	g__Photorhabdus	o__Enterobacterales
4-2_NODE_2074	NA	d__Bacteria;p__Firmicutes;c__Bacilli;o__Paenibacillales;f__Paenibacillaceae;g__Paenibacillus_C	iphop	c__Bacilli	g__Paenibacillus_C	o__Paenibacillales
4-2_NODE_2077	NA	d__Bacteria;p__Actinobacteriota;c__Coriobacteriia;o__Coriobacteriales;f__Coriobacteriaceae;g__Collinsella	iphop	c__Coriobacteriia	g__Collinsella	o__Coriobacteriales
4-2_NODE_2088	NA	d__Bacteria;p__Actinobacteriota;c__Actinomycetia;o__Mycobacteriales;f__Mycobacteriaceae;g__Mycobacterium	iphop	c__Actinomycetia	g__Mycobacterium	o__Mycobacteriales
4-2_NODE_21268_1	NA	d__Bacteria;p__Actinobacteriota;c__Actinomycetia;o__Mycobacteriales;f__Mycobacteriaceae;g__Mycobacterium	iphop	c__Actinomycetia	g__Mycobacterium	o__Mycobacteriales
4-2_NODE_2133	NA	d__Bacteria;p__Proteobacteria;c__Gammaproteobacteria;o__Burkholderiales;f__Burkholderiaceae;g__Polynucleobacter	iphop	c__Gammaproteobacteria	g__Polynucleobacter	o__Burkholderiales
4-2_NODE_2152	NA	d__Bacteria;p__Proteobacteria;c__Alphaproteobacteria;o__Rhizobiales;f__Beijerinckiaceae;g__Methylobacterium	iphop	c__Alphaproteobacteria	g__Methylobacterium	o__Rhizobiales
4-2_NODE_2167	NA	d__Bacteria;p__Proteobacteria;c__Gammaproteobacteria;o__Burkholderiales;f__Burkholderiaceae;g__Cupriavidus	iphop	c__Gammaproteobacteria	g__Cupriavidus	o__Burkholderiales
4-2_NODE_2209	NA	d__Bacteria;p__Proteobacteria;c__Gammaproteobacteria;o__Burkholderiales;f__Burkholderiaceae;g__Polynucleobacter	iphop	c__Gammaproteobacteria	g__Polynucleobacter	o__Burkholderiales
4-2_NODE_2214_fragment_1	NA	d__Bacteria;p__Proteobacteria;c__Alphaproteobacteria;o__Azospirillales;f__Azospirillaceae;g__Azospirillum	iphop	c__Alphaproteobacteria	g__Azospirillum	o__Azospirillales
4-2_NODE_2244	NA	d__Bacteria;p__Proteobacteria;c__Alphaproteobacteria;o__Rhizobiales;f__Xanthobacteraceae;g__Nitrobacter	iphop	c__Alphaproteobacteria	g__Nitrobacter	o__Rhizobiales
4-2_NODE_2268_fragment_1	NA	d__Bacteria;p__Proteobacteria;c__Alphaproteobacteria;o__Rhizobiales;f__Beijerinckiaceae;g__Methylobacterium	iphop	c__Alphaproteobacteria	g__Methylobacterium	o__Rhizobiales
4-2_NODE_2388	NA	d__Bacteria;p__Actinobacteriota;c__Actinomycetia;o__Actinomycetales;f__Dermatophilaceae;g__Lapillicoccus	iphop	c__Actinomycetia	g__Lapillicoccus	o__Actinomycetales
4-2_NODE_239_fragment_1	NA	d__Bacteria;p__Proteobacteria;c__Alphaproteobacteria;o__Sphingomonadales;f__Sphingomonadaceae;g__Sphingomonas	iphop	c__Alphaproteobacteria	g__Sphingomonas	o__Sphingomonadales
4-2_NODE_23_fragment_1	NA	d__Bacteria;p__Bacteroidota;c__Bacteroidia;o__Bacteroidales;f__Bacteroidaceae;g__Bacteroides	iphop	c__Bacteroidia	g__Bacteroides	o__Bacteroidales
4-2_NODE_2416	NA	Unknown	iphop	Unknown	Unknown	Unknown
4-2_NODE_2435	NA	d__Archaea;p__Methanobacteriota;c__Methanobacteria;o__Methanobacteriales;f__Methanobacteriaceae;g__Methanobacterium_B	iphop	c__Methanobacteria	g__Methanobacterium_B	o__Methanobacteriales
4-2_NODE_2461	NA	d__Bacteria;p__Proteobacteria;c__Gammaproteobacteria;o__Enterobacterales;f__Vibrionaceae;g__Vibrio	iphop	c__Gammaproteobacteria	g__Vibrio	o__Enterobacterales
4-2_NODE_2532	NA	d__Bacteria;p__Proteobacteria;c__Alphaproteobacteria;o__Rhizobiales;f__Rhizobiaceae;g__Mesorhizobium	iphop	c__Alphaproteobacteria	g__Mesorhizobium	o__Rhizobiales
4-2_NODE_2547	NA	d__Bacteria;p__Firmicutes;c__Bacilli;o__Lactobacillales;f__Lactobacillaceae;g__Oenococcus	iphop	c__Bacilli	g__Oenococcus	o__Lactobacillales
4-2_NODE_2553	NA	d__Bacteria;p__Actinobacteriota;c__Thermoleophilia;o__Solirubrobacterales;f__Solirubrobacteraceae;g__Palsa-465	iphop	c__Thermoleophilia	g__Palsa-465	o__Solirubrobacterales
4-2_NODE_2613	NA	d__Bacteria;p__Proteobacteria;c__Alphaproteobacteria;o__Rhizobiales;f__Xanthobacteraceae;g__Nitrobacter	iphop	c__Alphaproteobacteria	g__Nitrobacter	o__Rhizobiales
4-2_NODE_2741_1	NA	d__Bacteria;p__Bacteroidota;c__Bacteroidia;o__Flavobacteriales;f__Flavobacteriaceae;g__Flavobacterium	iphop	c__Bacteroidia	g__Flavobacterium	o__Flavobacteriales
4-2_NODE_2763	NA	d__Bacteria;p__Bacteroidota;c__Bacteroidia;o__Cytophagales;f__Spirosomaceae;g__Spirosoma	iphop	c__Bacteroidia	g__Spirosoma	o__Cytophagales
4-2_NODE_277	NA	d__Bacteria;p__Bdellovibrionota;c__Oligoflexia;o__Oligoflexales;f__Bog-1112;g__BOG-1112	iphop	c__Oligoflexia	g__BOG-1112	o__Oligoflexales
4-2_NODE_2779	NA	d__Bacteria;p__Proteobacteria;c__Alphaproteobacteria;o__Azospirillales;f__Azospirillaceae;g__Azospirillum	iphop	c__Alphaproteobacteria	g__Azospirillum	o__Azospirillales
4-2_NODE_278	NA	d__Bacteria;p__Proteobacteria;c__Alphaproteobacteria;o__Rhizobiales;f__Beijerinckiaceae;g__Methylobacterium	iphop	c__Alphaproteobacteria	g__Methylobacterium	o__Rhizobiales
4-2_NODE_2869	NA	d__Bacteria;p__Bacteroidota;c__Bacteroidia;o__Flavobacteriales;f__Flavobacteriaceae;g__Flavobacterium	iphop	c__Bacteroidia	g__Flavobacterium	o__Flavobacteriales
4-2_NODE_2874	NA	d__Bacteria;p__Firmicutes;c__Bacilli;o__Lactobacillales;f__Lactobacillaceae;g__Companilactobacillus	iphop	c__Bacilli	g__Companilactobacillus	o__Lactobacillales
4-2_NODE_2896	NA	d__Bacteria;p__Proteobacteria;c__Alphaproteobacteria;o__Rhodobacterales;f__Rhodobacteraceae;g__CACIIZ01	iphop	c__Alphaproteobacteria	g__CACIIZ01	o__Rhodobacterales
4-2_NODE_2928	NA	d__Bacteria;p__Proteobacteria;c__Alphaproteobacteria;o__Azospirillales;f__Azospirillaceae;g__Azospirillum	iphop	c__Alphaproteobacteria	g__Azospirillum	o__Azospirillales
4-2_NODE_2977	NA	d__Bacteria;p__Firmicutes;c__Bacilli;o__Lactobacillales;f__Lactobacillaceae;g__Companilactobacillus	iphop	c__Bacilli	g__Companilactobacillus	o__Lactobacillales
4-2_NODE_2993	NA	d__Bacteria;p__Proteobacteria;c__Alphaproteobacteria;o__Rhizobiales;f__Beijerinckiaceae;g__Methylobacterium	iphop	c__Alphaproteobacteria	g__Methylobacterium	o__Rhizobiales
4-2_NODE_3131	NA	d__Bacteria;p__Actinobacteriota;c__Actinomycetia;o__Streptomycetales;f__Streptomycetaceae;g__Streptomyces	iphop	c__Actinomycetia	g__Streptomyces	o__Streptomycetales
4-2_NODE_3167	NA	d__Bacteria;p__Proteobacteria;c__Gammaproteobacteria;o__Legionellales;f__Legionellaceae;g__Legionella	iphop	c__Gammaproteobacteria	g__Legionella	o__Legionellales
4-2_NODE_3253	NA	d__Bacteria;p__Proteobacteria;c__Gammaproteobacteria;o__Legionellales;f__Legionellaceae;g__Legionella	iphop	c__Gammaproteobacteria	g__Legionella	o__Legionellales
4-2_NODE_333	NA	d__Bacteria;p__Proteobacteria;c__Alphaproteobacteria;o__Rhizobiales;f__Beijerinckiaceae;g__28-YEA-48	iphop	c__Alphaproteobacteria	g__28-YEA-48	o__Rhizobiales
4-2_NODE_3341	NA	d__Bacteria;p__Proteobacteria;c__Gammaproteobacteria;o__Burkholderiales;f__Burkholderiaceae;g__Rhodoferax_B	iphop	c__Gammaproteobacteria	g__Rhodoferax_B	o__Burkholderiales
4-2_NODE_3370	NA	d__Bacteria;p__Proteobacteria;c__Gammaproteobacteria;o__Burkholderiales;f__UBA11063;g__UBA11063	iphop	c__Gammaproteobacteria	g__UBA11063	o__Burkholderiales
4-2_NODE_3370	NA	d__Bacteria;p__Proteobacteria;c__Gammaproteobacteria;o__UBA6186;f__UBA6186;g__UBA6186	iphop	c__Gammaproteobacteria	g__UBA6186	o__UBA6186
4-2_NODE_3381	NA	d__Bacteria;p__Proteobacteria;c__Gammaproteobacteria;o__Legionellales;f__Legionellaceae;g__Legionella	iphop	c__Gammaproteobacteria	g__Legionella	o__Legionellales
4-2_NODE_3387	NA	d__Bacteria;p__Actinobacteriota;c__Actinomycetia;o__Streptomycetales;f__Catenulisporaceae;g__Catenulispora	iphop	c__Actinomycetia	g__Catenulispora	o__Streptomycetales
4-2_NODE_3391	NA	d__Bacteria;p__Proteobacteria;c__Gammaproteobacteria;o__Legionellales;f__Legionellaceae;g__Legionella	iphop	c__Gammaproteobacteria	g__Legionella	o__Legionellales
4-2_NODE_3458	NA	d__Bacteria;p__Actinobacteriota;c__Actinomycetia;o__Mycobacteriales;f__Mycobacteriaceae;g__Mycobacterium	iphop	c__Actinomycetia	g__Mycobacterium	o__Mycobacteriales
4-2_NODE_3560	NA	d__Bacteria;p__Proteobacteria;c__Gammaproteobacteria;o__Enterobacterales;f__Enterobacteriaceae;g__Chania	iphop	c__Gammaproteobacteria	g__Chania	o__Enterobacterales
4-2_NODE_3625	NA	d__Bacteria;p__Proteobacteria;c__Alphaproteobacteria;o__Rhizobiales;f__Beijerinckiaceae;g__Methylobacterium	iphop	c__Alphaproteobacteria	g__Methylobacterium	o__Rhizobiales
4-2_NODE_3626	NA	d__Bacteria;p__Actinobacteriota;c__Actinomycetia;o__Propionibacteriales;f__Nocardioidaceae;g__Nocardioides	iphop	c__Actinomycetia	g__Nocardioides	o__Propionibacteriales
4-2_NODE_3633	NA	Unknown	iphop	Unknown	Unknown	Unknown
4-2_NODE_3702	NA	d__Archaea;p__Methanobacteriota;c__Methanobacteria;o__Methanobacteriales;f__Methanobacteriaceae;g__Methanobacterium_D	iphop	c__Methanobacteria	g__Methanobacterium_D	o__Methanobacteriales
4-2_NODE_3706	NA	d__Bacteria;p__Actinobacteriota;c__Actinomycetia;o__Streptomycetales;f__Streptomycetaceae;g__Streptomyces	iphop	c__Actinomycetia	g__Streptomyces	o__Streptomycetales
4-2_NODE_3804	NA	d__Bacteria;p__Proteobacteria;c__Gammaproteobacteria;o__Enterobacterales;f__Enterobacteriaceae;g__Chania	iphop	c__Gammaproteobacteria	g__Chania	o__Enterobacterales
4-2_NODE_4024	NA	d__Bacteria;p__Proteobacteria;c__Alphaproteobacteria;o__Rhizobiales;f__Beijerinckiaceae;g__Methylobacterium	iphop	c__Alphaproteobacteria	g__Methylobacterium	o__Rhizobiales
4-2_NODE_4043	NA	d__Bacteria;p__Acidobacteriota;c__Acidobacteriae;o__Acidobacteriales;f__Koribacteraceae;g__Sulfotelmatobacter	iphop	c__Acidobacteriae	g__Sulfotelmatobacter	o__Acidobacteriales
4-2_NODE_404_1	NA	d__Bacteria;p__Proteobacteria;c__Alphaproteobacteria;o__Rhizobiales;f__Beijerinckiaceae;g__Chelatococcus_A	iphop	c__Alphaproteobacteria	g__Chelatococcus_A	o__Rhizobiales
4-2_NODE_40_fragment_1	NA	d__Bacteria;p__Proteobacteria;c__Gammaproteobacteria;o__Burkholderiales;f__Burkholderiaceae;g__Cupriavidus	iphop	c__Gammaproteobacteria	g__Cupriavidus	o__Burkholderiales
4-2_NODE_40_fragment_2	NA	d__Bacteria;p__Proteobacteria;c__Gammaproteobacteria;o__Burkholderiales;f__Burkholderiaceae;g__Cupriavidus	iphop	c__Gammaproteobacteria	g__Cupriavidus	o__Burkholderiales
4-2_NODE_4105	NA	d__Bacteria;p__Proteobacteria;c__Gammaproteobacteria;o__Enterobacterales;f__Vibrionaceae;g__Vibrio	iphop	c__Gammaproteobacteria	g__Vibrio	o__Enterobacterales
4-2_NODE_4145	NA	d__Bacteria;p__Proteobacteria;c__Gammaproteobacteria;o__Pseudomonadales;f__HTCC2089;g__UBA7455	iphop	c__Gammaproteobacteria	g__UBA7455	o__Pseudomonadales
4-2_NODE_4145	NA	d__Bacteria;p__Firmicutes;c__Bacilli;o__Lactobacillales;f__Lactobacillaceae;g__Companilactobacillus	iphop	c__Bacilli	g__Companilactobacillus	o__Lactobacillales
4-2_NODE_4151	NA	d__Bacteria;p__Proteobacteria;c__Alphaproteobacteria;o__Sphingomonadales;f__Sphingomonadaceae;g__Sphingomonas	iphop	c__Alphaproteobacteria	g__Sphingomonas	o__Sphingomonadales
4-2_NODE_4254	NA	Unknown	iphop	Unknown	Unknown	Unknown
4-2_NODE_4276	NA	d__Bacteria;p__Proteobacteria;c__Alphaproteobacteria;o__Rhizobiales;f__Beijerinckiaceae;g__Methylobacterium	iphop	c__Alphaproteobacteria	g__Methylobacterium	o__Rhizobiales
4-2_NODE_4307	NA	d__Bacteria;p__Proteobacteria;c__Alphaproteobacteria;o__Rhizobiales;f__Beijerinckiaceae;g__Methylobacterium	iphop	c__Alphaproteobacteria	g__Methylobacterium	o__Rhizobiales
4-2_NODE_4347	NA	d__Bacteria;p__Actinobacteriota;c__Thermoleophilia;o__Solirubrobacterales;f__Solirubrobacteraceae;g__Palsa-465	iphop	c__Thermoleophilia	g__Palsa-465	o__Solirubrobacterales
4-2_NODE_4392	NA	d__Bacteria;p__Proteobacteria;c__Gammaproteobacteria;o__Enterobacterales;f__Vibrionaceae;g__Vibrio	iphop	c__Gammaproteobacteria	g__Vibrio	o__Enterobacterales
4-2_NODE_4416	NA	d__Bacteria;p__Proteobacteria;c__Alphaproteobacteria;o__Rhizobiales;f__Beijerinckiaceae;g__Methylobacterium	iphop	c__Alphaproteobacteria	g__Methylobacterium	o__Rhizobiales
4-2_NODE_4442	NA	d__Bacteria;p__Bacteroidota;c__Bacteroidia;o__Chitinophagales;f__Chitinophagaceae;g__Flavipsychrobacter	iphop	c__Bacteroidia	g__Flavipsychrobacter	o__Chitinophagales
4-2_NODE_447	NA	d__Bacteria;p__Proteobacteria;c__Alphaproteobacteria;o__Rhizobiales;f__Beijerinckiaceae;g__Methylobacterium	iphop	c__Alphaproteobacteria	g__Methylobacterium	o__Rhizobiales
4-2_NODE_4510	NA	d__Bacteria;p__Firmicutes;c__Bacilli;o__Lactobacillales;f__Streptococcaceae;g__Streptococcus	iphop	c__Bacilli	g__Streptococcus	o__Lactobacillales
4-2_NODE_4518	NA	d__Bacteria;p__Proteobacteria;c__Alphaproteobacteria;o__Rhizobiales;f__Stappiaceae;g__Pseudovibrio	iphop	c__Alphaproteobacteria	g__Pseudovibrio	o__Rhizobiales
4-2_NODE_4538	NA	d__Bacteria;p__Proteobacteria;c__Alphaproteobacteria;o__Rhizobiales;f__Beijerinckiaceae;g__Methylobacterium	iphop	c__Alphaproteobacteria	g__Methylobacterium	o__Rhizobiales
4-2_NODE_4548	NA	d__Bacteria;p__Proteobacteria;c__Gammaproteobacteria;o__Burkholderiales;f__Burkholderiaceae;g__Variovorax	iphop	c__Gammaproteobacteria	g__Variovorax	o__Burkholderiales
4-2_NODE_4594	NA	d__Bacteria;p__Proteobacteria;c__Alphaproteobacteria;o__Rhizobiales;f__Beijerinckiaceae;g__Methylobacterium	iphop	c__Alphaproteobacteria	g__Methylobacterium	o__Rhizobiales
4-2_NODE_4603	NA	Unknown	iphop	Unknown	Unknown	Unknown
4-2_NODE_4603	NA	d__Bacteria;p__Proteobacteria;c__Gammaproteobacteria;o__Burkholderiales;f__Burkholderiaceae;g__Variovorax	iphop	c__Gammaproteobacteria	g__Variovorax	o__Burkholderiales
4-2_NODE_4622	NA	d__Bacteria;p__Proteobacteria;c__Alphaproteobacteria;o__Rhizobiales;f__Beijerinckiaceae;g__Methylobacterium	iphop	c__Alphaproteobacteria	g__Methylobacterium	o__Rhizobiales
4-2_NODE_4665	NA	d__Bacteria;p__Proteobacteria;c__Alphaproteobacteria;o__Rhodobacterales;f__Rhodobacteraceae;g__Roseovarius	iphop	c__Alphaproteobacteria	g__Roseovarius	o__Rhodobacterales
4-2_NODE_4703	NA	d__Bacteria;p__Proteobacteria;c__Alphaproteobacteria;o__Rhizobiales;f__Beijerinckiaceae;g__Methylobacterium	iphop	c__Alphaproteobacteria	g__Methylobacterium	o__Rhizobiales
4-2_NODE_4768	NA	d__Bacteria;p__Proteobacteria;c__Alphaproteobacteria;o__Rhizobiales;f__Beijerinckiaceae;g__Methylobacterium	iphop	c__Alphaproteobacteria	g__Methylobacterium	o__Rhizobiales
4-2_NODE_4788	NA	d__Bacteria;p__Proteobacteria;c__Alphaproteobacteria;o__Rhizobiales;f__Beijerinckiaceae;g__Methylobacterium	iphop	c__Alphaproteobacteria	g__Methylobacterium	o__Rhizobiales
4-2_NODE_4801	NA	d__Bacteria;p__Proteobacteria;c__Alphaproteobacteria;o__Rhizobiales;f__Beijerinckiaceae;g__Methylobacterium	iphop	c__Alphaproteobacteria	g__Methylobacterium	o__Rhizobiales
4-2_NODE_4817	NA	d__Bacteria;p__Proteobacteria;c__Alphaproteobacteria;o__Rhizobiales;f__Beijerinckiaceae;g__Methylobacterium	iphop	c__Alphaproteobacteria	g__Methylobacterium	o__Rhizobiales
4-2_NODE_4904	NA	d__Bacteria;p__Firmicutes;c__Bacilli;o__Lactobacillales;f__Lactobacillaceae;g__Companilactobacillus	iphop	c__Bacilli	g__Companilactobacillus	o__Lactobacillales
4-2_NODE_4905	NA	d__Bacteria;p__Proteobacteria;c__Alphaproteobacteria;o__Rhizobiales;f__Xanthobacteraceae;g__Bradyrhizobium	iphop	c__Alphaproteobacteria	g__Bradyrhizobium	o__Rhizobiales
4-2_NODE_4929	NA	d__Bacteria;p__Actinobacteriota;c__Actinomycetia;o__Mycobacteriales;f__Mycobacteriaceae;g__Mycobacterium	iphop	c__Actinomycetia	g__Mycobacterium	o__Mycobacteriales
[truncated: 1,559 more rows]

## Sheet: Table S9
viruses	host	host_taxonomy	tool	order	viral geography
[truncated: 160 more rows]

## Sheet: Table 10
viruses	host	host_taxonomy	tool	class	genus	order
[truncated: 14 more rows]
